# Supplementary material for: Tumor Cell Marker PVRL4 (Nectin 4) Is an Epithelial Cell Receptor for Measles Virus
Source: PubMed Central journal article supplement (PMC3161989; doi:10.1371/journal.ppat.1002240), 2011-08-25

## Supporting Information

### Supporting Figures and Legends

**Figure S1. Human SAEC grown in 10% fetal calf serum and many adenocarcinoma cell lines are susceptible to infection by IC323-EGFP wtMV.** MGH24 (lung), NCI-H358 (lung), RVH6847 (lung), MCF7 (breast), MDA-MB-468 (breast), T47D (breast), Huh7 (liver) adenocarcinoma cell lines and SAEC (with serum) were visibly infected with the IC323-EGFP wtMV virus after 48 hrs incubation. SAEC (serum free), A549 (lung adenocarcinoma), SBC-3 (small cell lung carcinoma), MDA-MB-231 (breast adenocarcinoma), and HeLa (cervical carcinoma) were non-permissive for wtMV infections. Scale bar=100 $\mu$ m. See also Table 1.

**Figure S2. PVRL4 (Nectin 4) and CD150 (SLAM) expression renders cells susceptible to IC323-EGFP wtMV.** Non-permissive OMK, HeLa, A549, and MDA-MB-231 cells were transfected with expression plasmids expressing either CD150/SLAM or PVRL4 (Nectin 4) and incubated for 36 hrs. The transfected cells were infected with IC323-EGFP wtMV (m.o.i. 10) and incubated a further 48 hrs. Scale bar=100 $\mu$ m. See also Figure 3.

**Figure S3. Expression of (A) DDK- and (B) V5-tagged candidate receptors in COS-1 cells.** COS-1 cells were transfected with expression plasmids containing the coding sequences for candidate membrane protein receptors. After 36 hrs the cells were lysed and 10  $\mu$ g of whole cell lysate was separated by SDS-PAGE followed by Western immunoblot. Horseradish peroxidase-conjugated Flag antibodies (IB: DDK) or V5 antibodies (IB: V5) were incubated with the membranes and developed with enhanced chemiluminescence. (A) Duplicate expression clones of CDH1, F11R, GPC4, TMEM125, and a single clone of SUSD4 were transfected into COS-1 cells and analyzed with DDK(Flag) antibodies. These clones were purchased from Origene Systems. (B) Expression clones for CLDN1, CLDN4, CLDN7, RAB25, STX6, FAM84, JUP,

TACSTD2, and PVRL2 were prepared from the Open Biosystems Plasma Membrane Donor Library using Gateway Cloning technology and LR Clonase II (see Materials and Methods). The resulting clones contained a V5 tag sequence fused to the coding sequence of a particular gene to produce a recombinant protein with a V5 tag at its carboxyl terminus. See Figure 2 and Table 2.

**Figure S4. Comparison of protein sequences for human PVRL1, PVRL2, PVRL3, and PVRL4.** Sequences were aligned using the Clustal method from the DNASTar Lasergene analysis software. Shaded residues represent amino acids that are identical to the consensus sequence shared by the 4 proteins. PVRL4 exhibits 38% identity with the consensus. Sequences were obtained from the NCBI GeneBank. [PVRL1 NM\_002855.4; PVRL2 NM\_002856.2; PVRL3 NM\_015480.1; PVRL4 NM\_030916.2]. See also Figure 3.

**Figure S5. Immune histological analysis of PVRL4 in human tissues.** Formalin fixed paraffin embedded tissue slices from placenta, NCI-H358 xenografts grown in mice, lung adenocarcinoma, lung squamous carcinoma, reactive pneumocytes from the lung, and tonsil tissue were incubated with goat anti-PVRL4 antibody (1:1000) directed against a specific peptide sequence. Antibody binding was detected by incubating the tissue sections with biotin-anti-goat IgG, horse-radish peroxidase (HRP)-streptavidin, and diaminobenzidine (DAB) substrate. Labeled PVRL4 protein located in adherens junctions stained brown. Representative lighter staining structures in the pneumocytes and tonsils are indicated with arrows. Scale bar = 100 $\mu$ m. See also Figure 6.

**Figure S6. Comparison of protein sequences for human, orangutan (pongo), canine, rat, and mouse PVRL4 (Nectin 4).** Sequences were aligned using the Clustal method from the DNASTar Lasergene analysis software. Shaded residues represent differences from the human sequence. Human and orangutan sequences were almost 100% identical. Mouse and rat

sequences were 92% identical to that of humans. The canine PVRL4 sequence was 95% identical to the human sequence. Sequences were obtained from the NCBI GeneBank. [Human NM\_030916.2; Orangutan(Pongo) XM\_002809905.1; Cow NM\_001024494.1; Dog XM\_847277.1; Rat NM\_001109076.1; Mouse NM\_027893.3]. See also Figure 9.

**Figure S7. Other wild type strains of MV (Montefiore 89 and WTF) and the Edmonston vaccine strain of MV can also use PVRL4 as a receptor.** (A,B) Following transfection of the PVRL4 expression vector, OMK (owl monkey kidney) cells which lack a complete CD46 receptor, became susceptible to Edmonston vaccine MV. (C,D) HeLa cells transfected with the PVRL4 expression plasmid became susceptible to WTFH-EGFP MV infection. (E,F) HEK (293) cells transfected with PVRL4 become permissive to Montefiore 89 wtMV infections. In this case cells were fixed with paraformaldehyde, permeabilized with 0.1% TX-100 detergent, and stained with measles (H, M) antibodies and detected with Alexa Fluor 488 conjugated goat anti-mouse secondary antibodies. Nuclei were stained with Hoechst stain. Scale bar=100µm. See also Figures 2, S1, and S2.

**Table S1. Excel file showing normalized probe set intensity values and % up-regulation of membrane protein expression in MV permissive breast, lung, and primary SAEC.** Text files from Expression Console were exported to Microsoft Excel. Control data and non-annotated entries were discarded. Data was filtered for membrane proteins by using the Excel filter function for the GO cellular component term “membrane”, and this data was retained. Intensity values for the non-permissive cells (MDA-MB-231 and A549) were averaged and compared to the averaged probe set values of permissive breast and lung arrays and expressed as a percentage up or down regulation (Sheets 1 and 2). Regulation of membrane protein gene products in serum

activated SAEC compared to SAEC grown in serum was calculated in a similar fashion (Sheet 3). Probe set gene entries for each of the tissue types (breast, lung, SAEC) were ranked in descending order (percentage up/down regulation - high to low). See also Table 2.

## **Supplemental Experimental Procedures**

### **Microarray Analysis**

Total RNA was extracted from SAEC and adenocarcinoma cell lines using the Qiagen RNeasy kit. The quality and quantity of RNA was assessed by both A260/A280 values and using an Agilent RNA BioAnalyzer. Microarray analysis was performed at the Applied Genomics Centre associated with the Toronto Hospital for Sick Children by Xiolin Wang. The Applied Genomics Centre is an accredited Affymetrix Service Provider. cDNA (5.5µg in 220µl) was transcribed and biotin end-labeled using the Affymetrix IVT kit. The fragmented probe was hybridized to the Human Gene 1.0 ST Array cartridge and washed using the FS450\_0007 protocol, and stained with streptavidin-PE. The GeneChip was scanned with an Affymetrix GeneChip Scanner 3000. Chip data was analyzed by GCOS 1.4 and archived on DVD discs as GCOS DTT Files which included raw intensity CEL files and normalized CHP files. Microarray data was evaluated for Quality Control by the Applied Genomics Centre and transmitted to our laboratory. Data was further analyzed with Affymetrix Expression Console 1.1 software using the hugene-1\_0st v.1 na30.hg19 annotation file. Normalized probe set intensity values on a scale of 0 (no signal) to 14 (strongest signal) were converted to a text file and exported to Microsoft Excel 2003 for further analysis. Negative and positive control data was discarded and the Probe Set's were filtered using the Excel filter function for the GO cellular component term "membrane", and this data was retained. Gene up-regulation was calculated by applying the formula  $[(\text{SAEC with FCS}) - (\text{SAEC without FCS})] / (\text{SAEC without FCS})$  to the normalized microarray intensity values and

expressing up-regulation as a percentage. Gene up-regulation in permissive vs. non-permissive cells lines was obtained by applying the formula  $[(\text{permissive}) - (\text{non-permissive})] / (\text{non-permissive})$  to the microarray intensity values and expressing up-regulation as a percentage. Average gene up-regulation was determined for breast cancer (MCF7, MDA-MB-468, and T47D), lung cancer (MGH-24, NCI-H125, and NCI-H358) and SAEC cell lines (Table S1). Membrane protein genes which were up-regulated >20% were compared between permissive breast cell lines and permissive lung cell lines, and then with serum activated permissive SAEC using the Excel function  $[(\text{ISERROR}(\text{MATCH}(\text{A1}, \$\text{C}\$1:\$ \text{C}\$ \text{N}, 0)), "", \text{A1})]$ , where A contains the Gene Names in the cell type (eg. Breast) compared to the Gene Names (C) in another cell type (eg. Lung). N represents the number of entries in the list being compared. Up-regulated gene products that were common between the different permissive cell lines are tabulated in Figure 2.

### **Immune histochemistry protocol for staining PVRL4 in human tissue sections**

Formalin fixed paraffin embedded tissue was sliced at a 4  $\mu\text{m}$  thickness with a microtome and dried in a 60°C oven overnight. Sections were dewaxed in xylene and rehydrated through graded concentrations of alcohol to water. Endogenous peroxidase was blocked with 3% hydrogen peroxide. Heat induced epitope retrieval in 10 mM citrate buffer, pH 6.0 was performed in a Milestone T/T Mega microwave oven. After blocking for endogenous biotin using Vector's biotin blocking kit, sections were incubated in primary antibody (anti-Nectin-4, R&D Systems, goat polyclonal, 1:1000 dilution) for 16 hours at room temperature in a humidified chamber. After washing the sections in PBS, secondary incubations were carried out with biotin-anti-goat IgG (Vector Laboratories), followed by incubation with streptavidin-HRP (ID Laboratories) for 30 min. Antibody binding was revealed by treating the sections with DAB substrate (Dako

North America, Inc) for 5 min. Samples were counterstained with Mayer's haematoxylin and mounted in Permout.

Figure S1

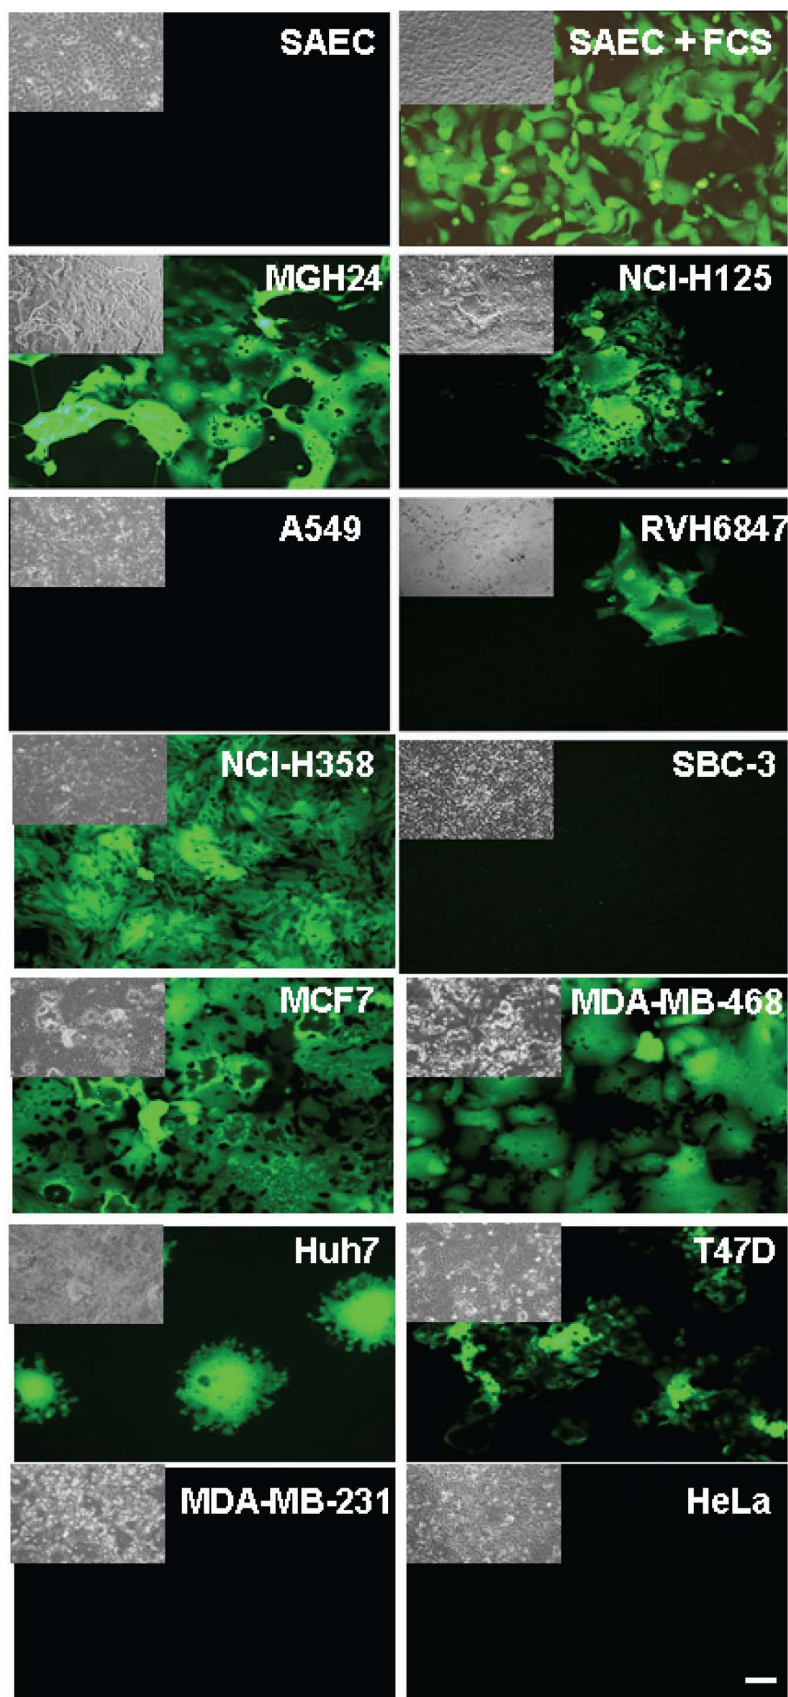

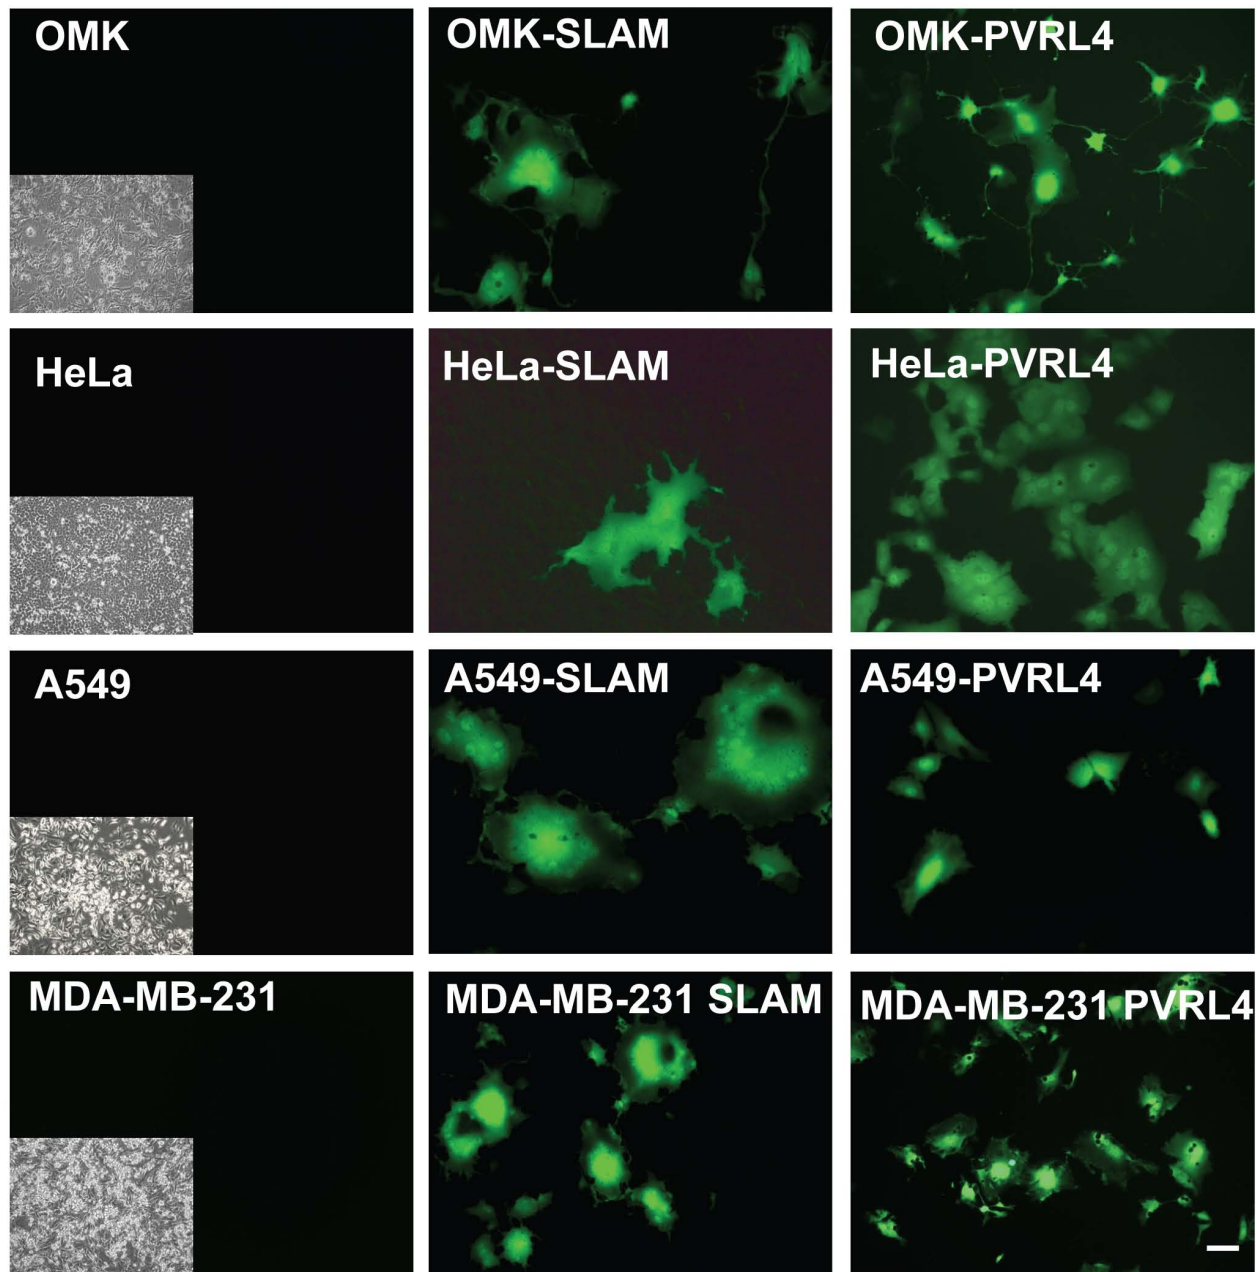



A

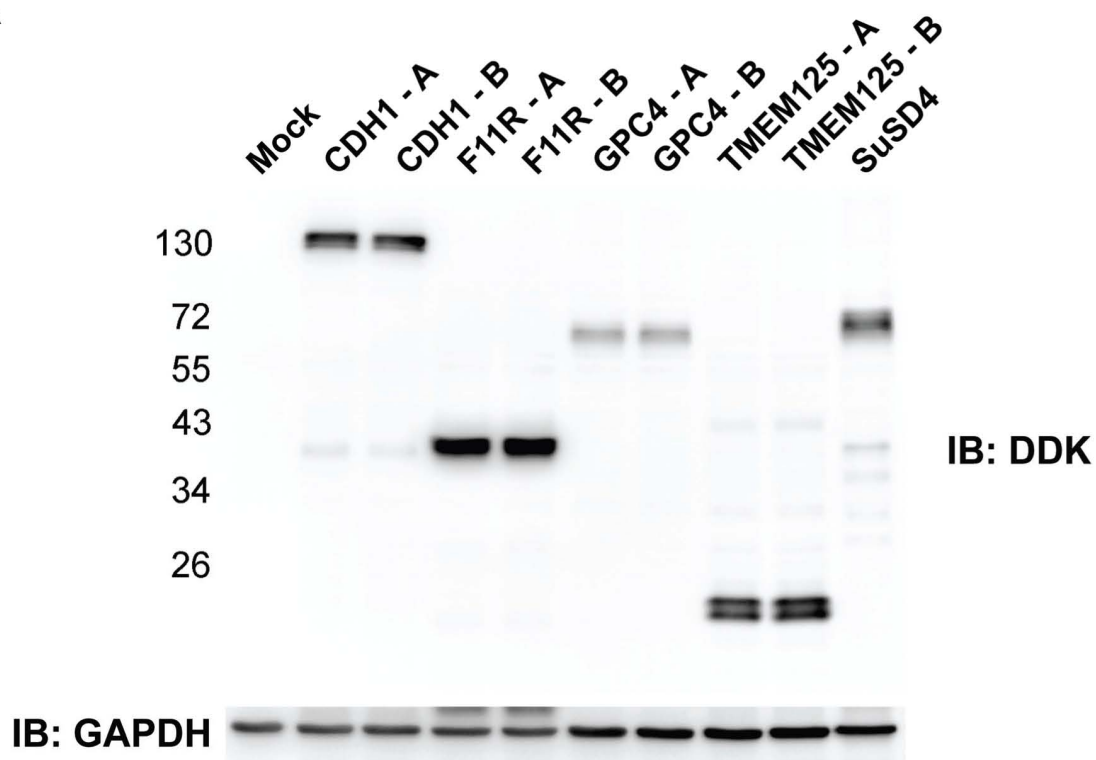

B

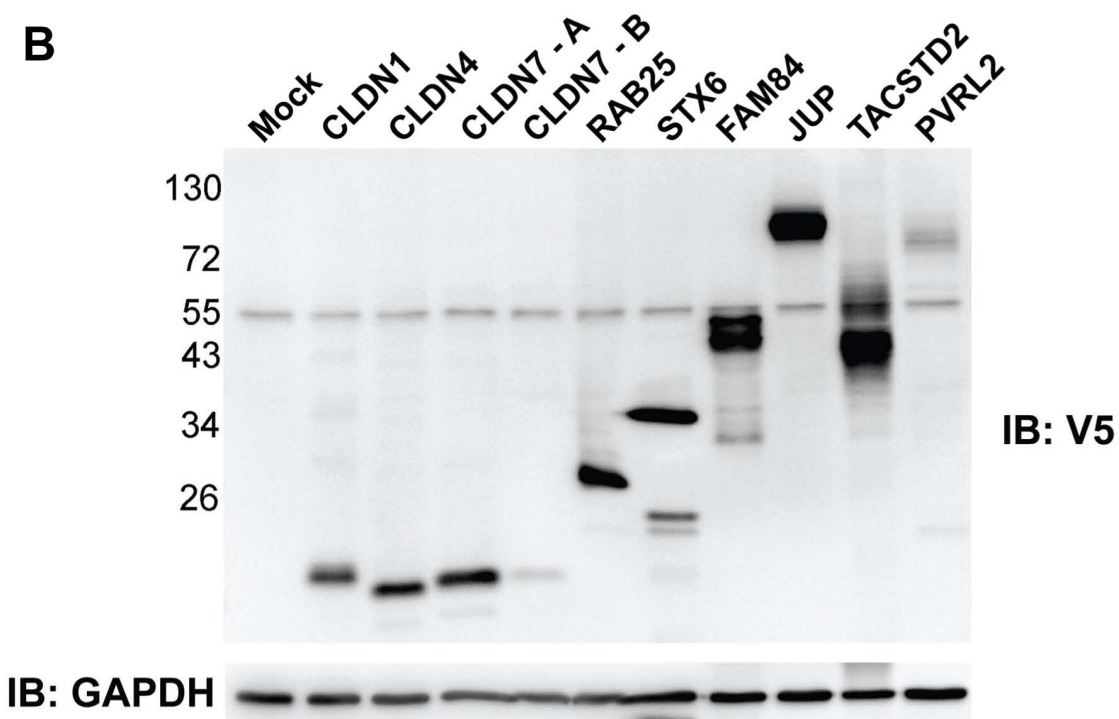

Figure S4

|                 |                                                                         |     |
|-----------------|-------------------------------------------------------------------------|-----|
| Human PVRL1.pro | MARM- --- GLAGAAGR- ----- WWGLALGLTA- ----- FF- ----- LPGVHSQVV         | 33  |
| Human PVRL2.pro | MAR- ----- AAALLPSRSPPTLLVPLLLLLLLET- - GAQDVRV                         | 36  |
| Human PVRL3.pro | MARTLRPSPLCPGGGKAQLSSASLLGAGLLLQPPTPPLLLLLFPLLLFSRLCGALAGPI             | 60  |
| Human PVRL4.pro | MPLSL- ----- GAEMWG- ----- PEAWLLLLLLLASFTRGCPAGEL                      | 34  |
| Human PVRL1.pro | QVNSMYGFI GTDVVLHCSFANPLPSVKI TQVTWQKSTNGSK- QNVAI YNPMSG- - VSVL       | 90  |
| Human PVRL2.pro | QVLPEVRGQLGGTVELPCHLLPPVPGLY SLVTWQRPDAPANHQNVAAFHPKMGPSFSP             | 96  |
| Human PVRL3.pro | I VEPHVTAVWGKNVSLKCLI E- - - VNETI TQI SVEKI HGKSS- QTVAVHHPQYG- - FSVQ | 114 |
| Human PVRL4.pro | ETSDVVTVVLGQDAKLPCFYRGD- SGEQVGVAVARVDAGEGAQELALLHSHKYG- - LHVS         | 91  |
| Human PVRL1.pro | APYRERVEFLRPS- ----- FTDGTIRLSRLELEDEGVYI CEFATFPTGNRESQLNL             | 140 |
| Human PVRL2.pro | KPGSERL SFVSAKQSTGQDTEAELQDATALHGLTVEDEGNYTCEFATFPKGSVRGMTWL            | 156 |
| Human PVRL3.pro | GEYQGRVLFKNYS- ----- LNDATITLHNI GFSDSGKYI CKAVTFPLGNAQSSTTV            | 164 |
| Human PVRL4.pro | PAYEGRVEQPPPPRNP- ----- LDGSVLLRNAVQADEGEYECRVSTFPAGSFQARLRL            | 143 |
| Human PVRL1.pro | TYMAKPT- NW EGTQAVLRRAKKGQDDKVLVATCTSANGKPPSVVSWETRLKGEAEYQEIR          | 199 |
| Human PVRL2.pro | RVI AKPK- ----- NQAEAQKVTFSQDPTTVALCISKEGRPPARI SVLSSL DWEAKETQVS       | 210 |
| Human PVRL3.pro | TVLVEPTVSLIKGPDSLI- - - - DGGNETVAACI AATGKPAHI DWEGDL- GEMESTTTS       | 219 |
| Human PVRL4.pro | RVLVPLPSLNPGR- ----- ALEEGQGLTLAASCTA- EGSPAPSVTWTEVKGTTSSRSFK          | 197 |
| Human PVRL1.pro | NP- NGTVTVI SRYRLVPSREAHQQLACI VNYH- MDR- FKESLTLNVQYEPPEVTI EGF DG     | 256 |
| Human PVRL2.pro | GTLAGTVTVTSRFTLVPSGRADGVTVTCKVEHESFEEPALIPVTL SVRYPPPEVSI SGYDD         | 270 |
| Human PVRL3.pro | FP- NETATI I SQYKLFPTFRARGRI TCVVKHPALEKDI RYSFI LDI QYAPEVSVTGYDG      | 278 |
| Human PVRL4.pro | H- - SRSAAVTSEFHLVPSRSMNGQPLTCVVSHPGLLQDQRI THILHVSFLAEASVRGLED         | 255 |
| Human PVRL1.pro | N- - WYLQRMDVKLTCKADANPPATEYHWTTLNGSLPKGVEAQRNRLF KGPINYSLAGTY          | 314 |
| Human PVRL2.pro | N- - WYLGRTDATALSCDVRSNPEPTGYDWSTTSGTFPTSAVAQGSQQLVI- HAVDSL FNTTF      | 327 |
| Human PVRL3.pro | N- - WYVGRKGVNLKCNADANPPPFKSVWSRLDGQWPDGLLASDNTLHFVHPLTFNYSGVY          | 336 |
| Human PVRL4.pro | QNLWHI GREGAMLKCLSEGQPPP- SYNWTRLDGPLPSGVRVDGDTLGF- PPLTTEHSGI Y        | 313 |
| Human PVRL1.pro | I CEATNPI GTRSGQVEVNI TE- ----- FPYTPSPPEH                              | 345 |
| Human PVRL2.pro | VCTVTNAVGMGRAEQVI FVRETPNTAGAGAT- ----- GGI GGI IAAI ATAVAATGILI        | 381 |
| Human PVRL3.pro | ICKVTNSLQGRSDQKVI YI SDPPTTTTLQPTIQWHPSTADI EDLATEPKKLPF- PLSTLA        | 395 |
| Human PVRL4.pro | VCHVSNEFSSRDSQVTVDVLDPEQEDSGKQ- - VDLVSASVVVVGVIAALLFCLLVVVVVL M        | 371 |
| Human PVRL1.pro | GRRAGPVPTAI I GGVAGSILLVLI VVGGI VVALRRRRHTFKGDYSTKKHVYNGYSGAGI         | 405 |
| Human PVRL2.pro | C- RQQRKEQTLQGAEEDEDLEGPPSYKPTPKAKLEAQEMPSQLFTLGA SEHSPLKTPYF           | 440 |
| Human PVRL3.pro | TI KDDTI ATIIASVGGALFIVLVSVLAGI FCYRRRR- TFRGDYFAKNI PPSDMQKE- -        | 452 |
| Human PVRL4.pro | SRYHRRKAQMQTKYEEELTLTRENSIRRLHSHHTDPRSQPEESVGLRAEGHPDSLKDNS             | 431 |
| Human PVRL1.pro | PQHHPMAQNLQ- YPD- DSDDEKKA- - GPLGGSSYYYYYYYYEGGGGGERKVGPHPKYD          | 461 |
| Human PVRL2.pro | DAGASCTEQEMPRYHELPTLEERSGPLHP- - GATSLGSPIPVPPGPPAVEDVSLDLEDEE          | 498 |
| Human PVRL3.pro | SQIDVLQQDELDSYPD- SVKKNKNPVNNLI RKDYLEEPEKTQ- ----- WNNVENLNRFE         | 505 |
| Human PVRL4.pro | SCSVMSEEPGRSYSTLTTVREI ETQTELLS- ----- PGSG- ----- RAE                  | 469 |
| Human PVRL1.pro | EDAKRPFYTVDEAEARQDGYGDRTLGYQYDPEQL- - DLAENMVSQNDGSFI SKKEWYV           | 517 |
| Human PVRL2.pro | EEEEEEYL- ----- DKINPIYDALSYS- - - SPDSYQGGK- ----- FVMSRAMYV           | 538 |
| Human PVRL3.pro | - - - - RP- ----- MDYYEDLKMGMKFVSDHYDENEDDLVSHVDGSI SRREWYV             | 549 |
| Human PVRL4.pro | EEEDQD- - - - EGI KQAMNHVQENGTLRAKPTG- ----- NGIYI NGRGHLV              | 510 |

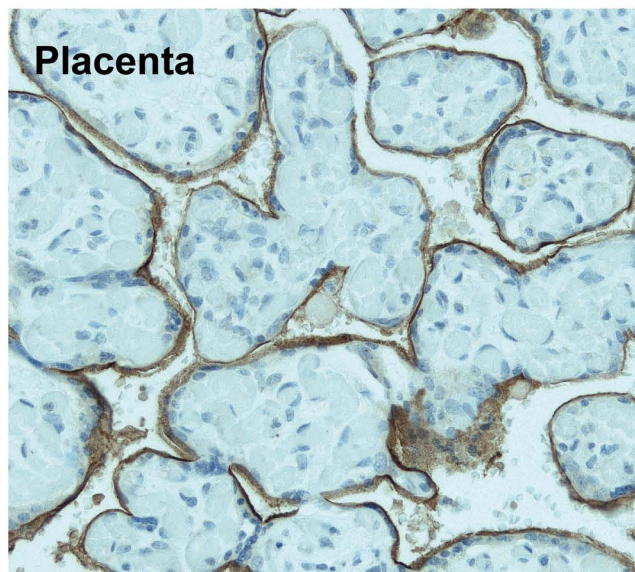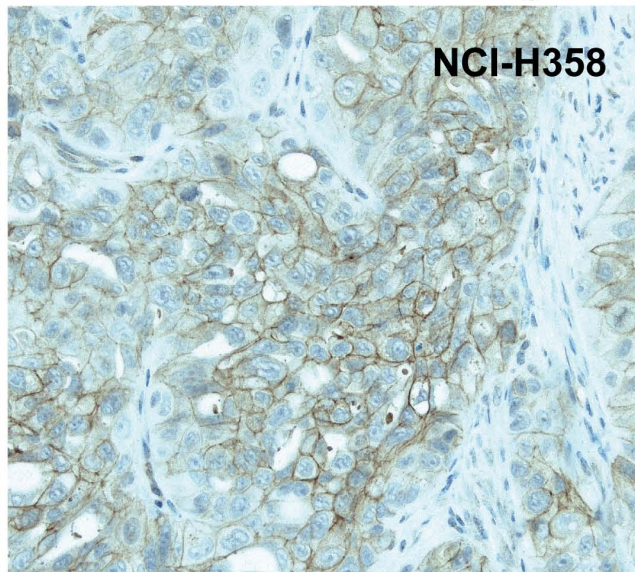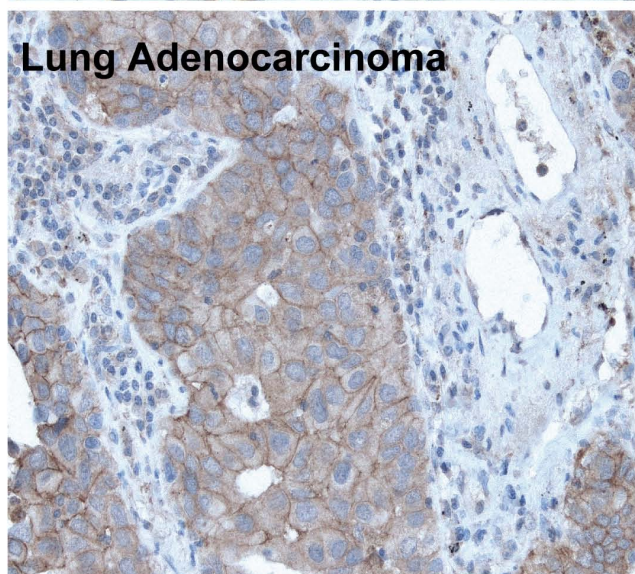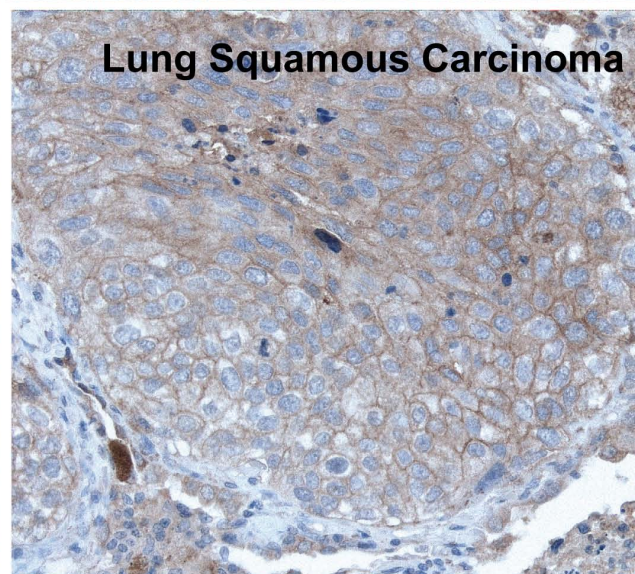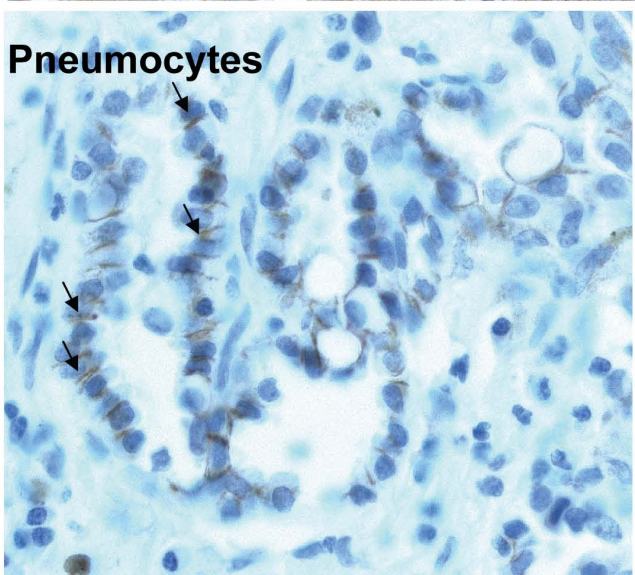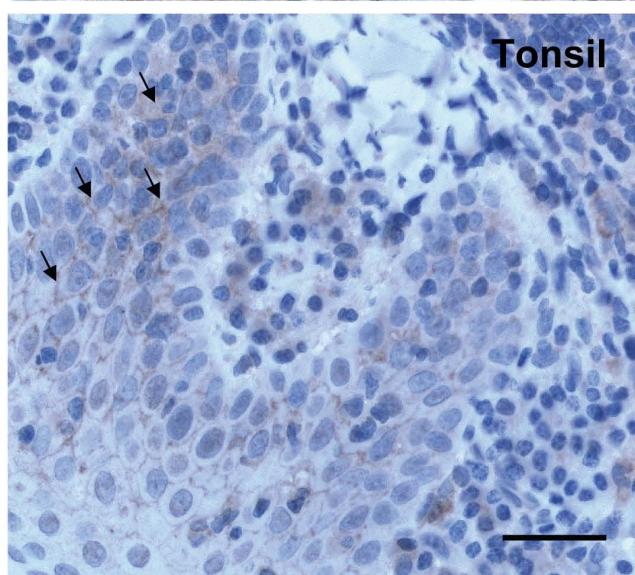

# Figure S6

|                  |                                                                    |     |
|------------------|--------------------------------------------------------------------|-----|
| Human PVRL4.pro  | MPLSLGAEMWGPEAWLLLLLLLASFTGRCPAGELETSDVVTVVLGQDAKLPCFYRGDSGE       | 60  |
| Pongo PVRL4.pro  | MPLSLGAEMWGPEAWLLLLLLLASFTGRCPAGELETSDVVTVVLGQDAKLPCFYRGDSGE       | 60  |
| Canine PVRL4.pro | MPLSLGAEMWGPEV·LLLLLLLASFTGRCPAGELETSDVVTVVLGQDAKLPCFYRGDPGE       | 59  |
| Rat PVRL4.pro    | MPLSLGAEMWGPEAWLLLLFL·ASFTGRYSAGELETSDVVTVVLGQDAKLPCFYRGDPDE       | 59  |
| Mouse PVRL4.pro  | MPLSLGAEMWGPEAWRL·LLFL·ASFTGQYSAGELETSDVVTVVLGQDAKLPCFYRGDPDE      | 59  |
| Human PVRL4.pro  | QVGQVAWARVDAGEGAQELALLHSKYGLHVSPAYEGRVEQPPPPRNPLDGSVLLRNAVQA       | 120 |
| Pongo PVRL4.pro  | QVGQVAWARVDAGEGAQELALLHSKYGLHVSPAYEGRVEQPPPPRNPLDGSVLLRNAVQA       | 120 |
| Canine PVRL4.pro | QVGQVAWARVDAGEGAQELALLHSKYGLHVS·AYEGRVEQPPPPRNPLDGSVLLRNAVQA       | 119 |
| Rat PVRL4.pro    | QVGQVAWARVDPNEGTRELALLHSKYGLHVSPAYEDRVEQPPPPRPDPLDGSVLLRNAVQA      | 119 |
| Mouse PVRL4.pro  | QVGQVAWARVDPNEGI·RELALLHSKYGLHV·NPAYEDRVEQPPPPRPDPLDGSVLLRNAVQA    | 119 |
| Human PVRL4.pro  | DEGEYECRVSTFFPAGSFQARLRRLVLPPLPSLNPGPAL EEGQGLTLAASCTAEGSPAPS      | 180 |
| Pongo PVRL4.pro  | DEGEYECRVSTFFPAGSFQARLRRLVLPPLPSLNPGPAL EEGQGLTLAASCTAEGSPAPS      | 180 |
| Canine PVRL4.pro | DEGEYECRVSTFFPAGSFQARLRRLVLPPLPSLNPGPAL EEGQGLTLAASCTAEGSPAPS      | 179 |
| Rat PVRL4.pro    | DEGEYECRVSTFFPAGSFQARMRLRVLVPPLPSLNPGP·LEEQGLTLAASCTAEGSPAPS       | 179 |
| Mouse PVRL4.pro  | DEGEYECRVSTFFPAGSFQARMRLRVLVPPLPSLNPGP·LEEQGLTLAASCTAEGSPAPS       | 179 |
| Human PVRL4.pro  | VTWDTEVKGTTSSRSFKHSRSAAVTSEFHLVPSRSMNGQPLTCVVSHPGLLQDQRI THIL      | 240 |
| Pongo PVRL4.pro  | VTWDTEVKGTTSSRSFKHSRSAAVTSEFHLVPSRSMNGQPLTCVVSHPGLLQDQRI THIL      | 240 |
| Canine PVRL4.pro | VTWDTEVKGTTSSRSFKHSRSAAVTSEFHLVPSRSMNGQPLTCVVSHPGLLQDQRI THVL      | 239 |
| Rat PVRL4.pro    | VTWDTEVKGTQSSRSFKHSRSAAVTSEFHLVPSRSMNGQPLTCVVSHPGLLQDQRI THTL      | 239 |
| Mouse PVRL4.pro  | VTWDTEVKGTQSSRSFT·HPSRSAAVTSEFHLVPSRSMNGQPLTCVVSHPGLLQDQRI THTL    | 239 |
| Human PVRL4.pro  | HVSFLAEASVRGLEDQNLWHI GREGAMLKCLSEGQPPPSYNWTRL DGPLPSGVRVDGDTL     | 300 |
| Pongo PVRL4.pro  | HVSFLAEASVRGLEDQNLWHV GREGAMLKCLSEGQPPPSYNWTRL DGPLPSGVQVDGDTL     | 300 |
| Canine PVRL4.pro | QVAF·FLAEASVRGLEDQKLWQV GREGATL KCLSEGHPPPSYNWTRL DGPLPSGVRVQDGL   | 299 |
| Rat PVRL4.pro    | QVAF·FLAEASVRGLEDQNLWHV GREGATL KCLSEGQPPPKYNWTRL DGPLPSGVRVKGDTL  | 299 |
| Mouse PVRL4.pro  | QVAF·FLAEASVRGLEDQNLWQV GREGATL KCLSEGQPPPKYNWTRL DGPLPSGVRVKGDTL  | 299 |
| Human PVRL4.pro  | GF PPLTTEHSGI YVCHVSNEFSSRDSQVTVDVLDPQEDSGKQVDLVSASVVVVGVI AALL    | 360 |
| Pongo PVRL4.pro  | GF PPLTTEHSGI YVCHVSNEFSSRDSQVTVDVLDPQEDSGKQVDLVSASVVVVGVI AALL    | 360 |
| Canine PVRL4.pro | GF PPLTAEHSGI YVCHVSNELSSRDSQVTVDVLDPEEAPGKQVDLVSASVVVVGVI AALL    | 359 |
| Rat PVRL4.pro    | GF PPLTTEHSGVYVCHVSNELSSRASQVTVEVLDP·EDPGKQVDLVSASVVVVGVI AALL     | 358 |
| Mouse PVRL4.pro  | GF PPLTTEHSGVYVCHVSNELSSRDSQVTVEVLDP·EDPGKQVDLVSASVITVGVIAALL      | 358 |
| Human PVRL4.pro  | FCLLVVVVVVLM·SRYHRRKAQQMTQKYEELTLTRENSI RRLHSHHTDPRSQPEESVGLRA     | 420 |
| Pongo PVRL4.pro  | FCLLVVVVVVLM·SRYHRRKAQQMTQKYEELTLTRENSI RRLHSHHTDPRSQPEESVGLRA     | 420 |
| Canine PVRL4.pro | FCLLVVVVVVLM·SRYHRRKAQQMTQKYEELTLTRENSI RRLHSHHS·DPRSQPEESVGLRA    | 419 |
| Rat PVRL4.pro    | FCLLVVVVVVLM·SRYHRRKAQQMTQKYEELTLTRENSI RRLHSHHTDPRSQPEESVGLRA     | 418 |
| Mouse PVRL4.pro  | FCLLVVVVVVLM·SRYHRRKAQQMTQKYEELTLTRENSI RRLHSHHS·DPRSQPEESVGLRA    | 418 |
| Human PVRL4.pro  | EGHPDSLKD·NSSCSVMSEEP·EGRSYSTLTTVREI ETQTELLSPGSGRAEEEEEDQDEGI KQ  | 480 |
| Pongo PVRL4.pro  | EGHPDSLKD·NSSCSVMSEEP·EGRSYSTLTTVREI ETQTELLSPGSGRAEEEE·DQDEGI KQ  | 479 |
| Canine PVRL4.pro | EGHPDSLKD·NSSCSVMSEEP·EGRSYSTLTTVREI ETQTELLSPGSGRAEEEEEDRDEGI KQ  | 479 |
| Rat PVRL4.pro    | EGHPDSLKD·NSSCSVMSEEP·EGRSYSTLTTVREI ETQTELLSPGSGRTEEEEDDQDEGI KQ  | 478 |
| Mouse PVRL4.pro  | EGHPDSLKD·NSSCSVMSEEP·EGRSYSTLTTVREI ETQTELLSPGSGRTEEEEDDDQDEGI KQ | 478 |
| Human PVRL4.pro  | AMNHFVQENGLRAKPTGNGI YI NGRGHLV                                    | 510 |
| Pongo PVRL4.pro  | AMNHFVQENGLRAKPTGNGI YI NGRGHLV                                    | 509 |
| Canine PVRL4.pro | AMNHFVQENGLRAKPTGNGI YI NGRGHLV                                    | 509 |
| Rat PVRL4.pro    | AMNHFVQENGLRAKPTGNGI YI NGRGHLV                                    | 508 |
| Mouse PVRL4.pro  | AMNHFVQENGLRAKPTGNGI YI NGRGHLV                                    | 508 |

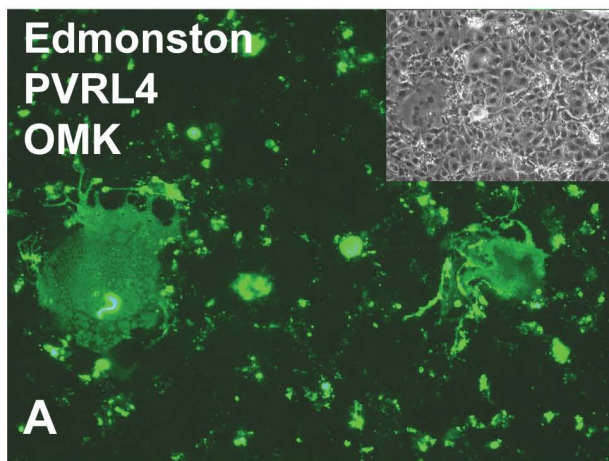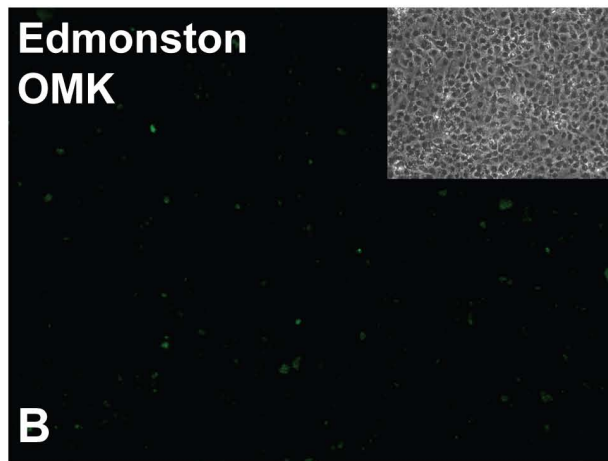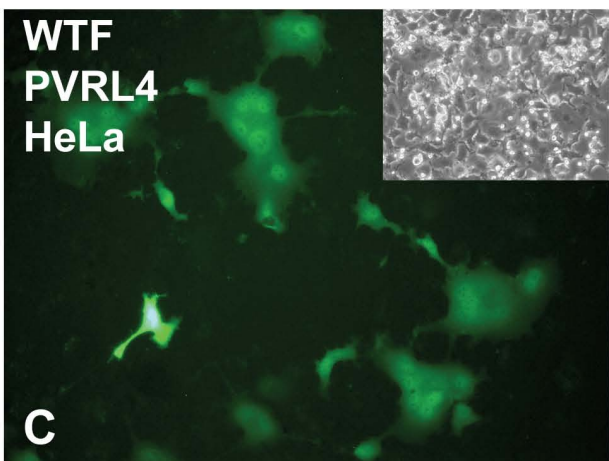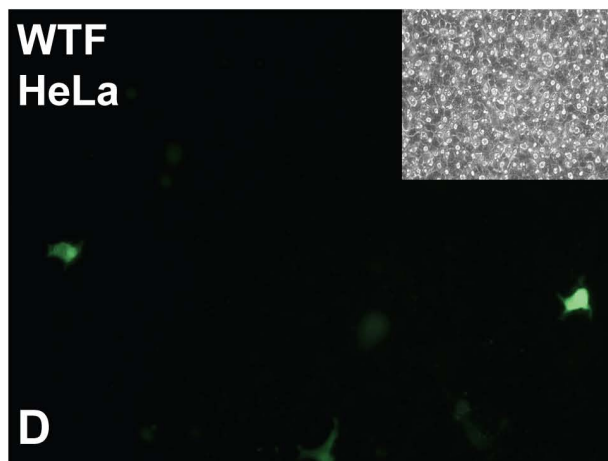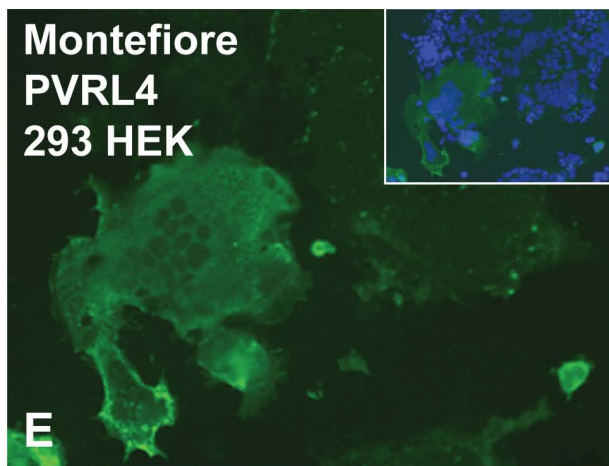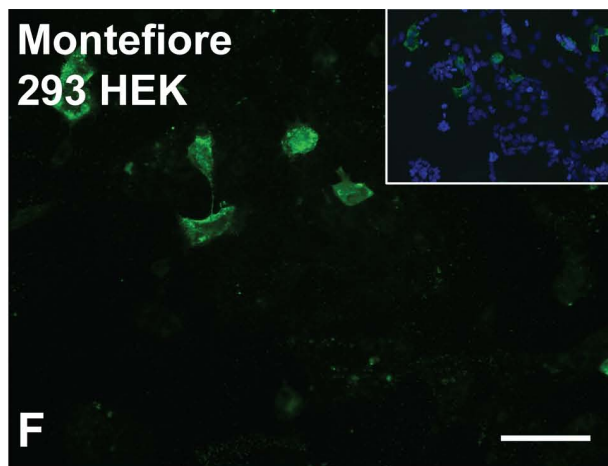

Supplement: ppat.1002240.s001.pdf [file ppat.1002240.s001.pdf]
