# Supplementary material for: Tumor Cell Marker PVRL4 (Nectin 4) Is an Epithelial Cell Receptor for Measles Virus
Source: PLoS Pathog. 2011 Aug 25;7(8):e1002240. doi: 10.1371/journal.ppat.1002240 (PMC3161989; doi:10.1371/journal.ppat.1002240)
Supplement: Table S1 — Excel file showing normalized probe intensity values and % up-regulation of membrane protein expression in breast, lung, and primary SAEC. Related to Table 2 showing data used to determine common gene products that were >20% up-regulated in susceptible breast adenocarcinoma, lung adenocarcinoma, and serum activated SAEC. (XLSX) [file ppat.1002240.s002.xlsx]

## Sheet: Breast Arrays
MDA-231 (1)	MDA-231 (2)	MDA-231 (3)		MDA-231 Avg		MCF-7	MDA-468	T47D		Avg of Positives		%Up/Down		Gene Description	Gene Accession	Gene Symbol	Cytoband	GO Cellular Component Term	Probe Set ID
3.40313	3.00006	3.28061		3.22793		11.2458	10.3442	10.3977		10.6625		230.321		histone cluster 1, H2bf	NM_003522	HIST1H2BF	6p21.3	---	8117395
3.32526	3.21329	4.10305		3.5472		6.39113	12.6411	12.5476		10.5266		196.759		matrix Gla protein	NM_000900	MGP	12p13.1-p12.3	extracellular region // proteinaceous extracellular matrix // extracellular space // endoplasmic reticulum // protein complex	7961514
4.51759	3.8005	4.40411		4.24073		12.2436	11.6495	11.5994		11.8309		178.981		epithelial splicing regulatory protein 1	NM_017697	ESRP1	8q22.1	nucleus	8147351
3.01936	3.35896	3.2054		3.19457		9.32402	9.80068	7.56229		8.89566		178.462		neuropilin (NRP) and tolloid (TLL)-like 2	NM_018092	NETO2	16q11	membrane // integral to membrane	8001197
3.55894	3.07029	3.88612		3.50512		11.156	9.43643	8.12931		9.57393		173.141		solute carrier family 6 (amino acid transporter), member 14	NM_007231	SLC6A14	Xq23-q24	integral to plasma membrane // membrane // brush border membrane	8169504
3.01936	2.93079	3.50863		3.15293		4.41795	8.66485	12.4393		8.50737		169.825		CD36 molecule (thrombospondin receptor)	NM_001001548	CD36	7q11.2	membrane fraction // Golgi apparatus // plasma membrane // integral to plasma membrane // cell surface // cell surface // platelet alpha granule membrane	8133876
4.63258	3.8005	4.63735		4.35681		11.2135	11.0475	11.9789		11.4133		161.964		RAB25, member RAS oncogene family	NM_020387	RAB25	1q22	cytoplasm // plasma membrane	7906079
5.18012	4.28851	4.87803		4.78222		12.6204	12.3912	12.1861		12.3993		159.278		histone cluster 1, H1b	NM_005322	HIST1H1B	6p22-p21.3	nucleosome // nucleus // chromosome	8124527
3.86664	3.28585	3.13083		3.42778		9.28061	7.78701	8.74485		8.60416		151.013		histone cluster 1, H2ae	NM_021052	HIST1H2AE	6p22.2-p21.1	---	8117408
3.94156	3.35896	3.81174		3.70409		4.35621	12.3812	9.98158		8.90634		140.446		cysteine-rich secretory protein 3	NM_006061	CRISP3	6p12.3	extracellular region // proteinaceous extracellular matrix // specific granule	8126905
3.71401	3.32241	3.28161		3.43934		8.25214	7.96489	8.44793		8.22166		139.047		vav 3 guanine nucleotide exchange factor	NM_006113	VAV3	1p13.3	intracellular	7918157
5.29432	4.73062	5.0788		5.03458		12.4558	10.0336	12.4177		11.6357		131.115		cadherin 1, type 1, E-cadherin (epithelial)	NM_004360	CDH1	16q22.1	cytoplasm // Golgi apparatus // plasma membrane // plasma membrane // cell-cell adherens junction // focal adhesion // actin cytoskeleton // integral to membrane // lateral plasma membrane // catenin complex // cell junction // perinuclear region of cytoplasm	7996837
3.2094	2.93079	3.39436		3.17818		7.36442	7.20302	7.36994		7.31246		130.083		elongation of very long chain fatty acids (FEN1/Elo2, SUR4/Elo3, yeast)-like 4	NM_022726	ELOVL4	6q14	cellular_component // endoplasmic reticulum // membrane // integral to membrane	8127767
4.29464	3.94488	4.36905		4.20285		12.8405	7.74381	8.23682		9.60705		128.584		chromosome 3 open reading frame 57	NM_001040100	C3orf57	3q26.1	endoplasmic reticulum // membrane // integral to membrane // serine C-palmitoyltransferase complex	8091799
3.40304	3.1414	3.50863		3.35102		3.5374	10.1496	9.15483		7.61393		127.212		selenoprotein P, plasma, 1	NM_005410	SEPP1	5q31	extracellular region // extracellular space	8111915
3.67534	3.28613	3.66093		3.5408		11.8698	2.89855	9.32026		8.02954		126.772		---	---	---	---	---	8130209
4.49021	4.59996	4.10883		4.39966		10.299	9.0921	10.4965		9.96256		126.439		histone cluster 1, H1d	NM_005320	HIST1H1D	6p21.3	nucleosome // nucleus // chromosome	8124430
4.87153	4.12066	5.34462		4.77894		10.5155	9.60949	11.0825		10.4025		117.674		grainyhead-like 2 (Drosophila)	NM_024915	GRHL2	8q22.3	nucleus // cytoplasm	8147697
4.4564	3.76418	4.06617		4.09559		9.07125	7.28253	10.1376		8.83047		115.609		elongation of very long chain fatty acids (FEN1/Elo2, SUR4/Elo3, yeast)-like 2	NM_017770	ELOVL2	6p24.2	endoplasmic reticulum // microsome // membrane // integral to membrane	8123920
3.44202	3.17735	4.03194		3.55043		6.53775	9.68469	6.71374		7.64539		115.337		CD109 molecule	NM_133493	CD109	6q13	extracellular region // extracellular space // plasma membrane // anchored to membrane	8120719
3.1713	2.86312	3.13083		3.05508		7.67318	5.3872	6.55338		6.53792		114.001		histone cluster 1, H3e	NM_003532	HIST1H3E	6p21.3	---	8117415
3.63586	3.03517	3.16883		3.27995		9.4134	7.3774	4.26042		7.01707		113.938		SLIT and NTRK-like family, member 6	NM_032229	SLITRK6	13q31.1	membrane // integral to membrane	7972239
3.63668	3.28585	3.88612		3.60288		6.2081	8.82929	8.00003		7.67914		113.139		schlafen family member 11	NM_001104587	SLFN11	17q12	nucleus	8014233
4.45453	4.41514	4.40235		4.42401		9.06443	9.00145	10.0709		9.37891		112		metastasis associated in colon cancer 1	NM_182762	MACC1	7p21.1	nucleus // cytoplasm	8138466
5.23745	5.08721	5.59608		5.30691		9.7795	12.0206	11.8281		11.2094		111.223		glycoprotein (transmembrane) nmb	NM_001005340	GPNMB	7p15	integral to plasma membrane // membrane // cytoplasmic membrane-bounded vesicle // melanosome	8131844
4.01263	3.61706	4.39366		4.00778		6.33762	10.318	8.54822		8.40128		109.624		V-set domain containing T cell activation inhibitor 1	NM_024626	VTCN1	1p13.1	plasma membrane // integral to membrane	7918936
3.55894	3.58014	4.37252		3.8372		9.50766	7.29336	7.27618		8.02573		109.156		scinderin	NM_001112706	SCIN	7p21.3	cytoplasm // cytoskeleton // cell cortex	8131550
5.98309	5.61475	6.05271		5.88352		12.2863	12.5596	12.0382		12.2947		108.968		histone cluster 1, H3i	NM_003533	HIST1H3I	6p22-p21.3	---	8124531
4.36135	3.50626	4.10305		3.99022		6.37383	7.54584	10.7723		8.23066		106.271		ATP-binding cassette, sub-family A (ABC1), member 12	NM_173076	ABCA12	2q34	membrane // integral to membrane	8058708
4.60611	3.87342	4.24099		4.24017		7.53084	9.16456	9.43881		8.7114		105.449		RAS-like, estrogen-regulated, growth inhibitor	NM_032918	RERG	12p12.3	intracellular // nucleus // cytoplasm // cytosol	7961540
3.36415	3.54323	3.77418		3.56052		7.743	6.36177	7.67842		7.26107		103.933		glypican 4	NM_001448	GPC4	Xq26.1	extracellular region // proteinaceous extracellular matrix // extracellular space // plasma membrane // integral to plasma membrane // anchored to membrane	8175217
4.74224	3.07029	4.67246		4.16166		8.61221	8.45055	8.33229		8.46502		103.405		solute carrier family 16, member 1 (monocarboxylic acid transporter 1)	NM_003051	SLC16A1	1p12	membrane fraction // plasma membrane // integral to membrane	7918622
5.86429	5.39237	6.03081		5.76249		11.647	11.4943	11.6939		11.6117		101.505		cellular retinoic acid binding protein 2	NM_001878	CRABP2	1q21.3	nucleus // cytoplasm	7921099
3.71401	3.43248	3.81174		3.65274		5.75303	9.77291	6.47583		7.33393		100.779		STEAP family member 4	NM_024636	STEAP4	7q21.12	Golgi apparatus // plasma membrane // integral to membrane	8140840
3.48046	3.00054	4.25815		3.57972		8.51491	5.49387	7.36836		7.12571		99.058		B melanoma antigen family, member 2	NM_182482	BAGE2	21p	extracellular region	8069487
4.84667	4.12066	4.55316		4.50683		9.71677	8.5191	8.64131		8.95906		98.7885		histone cluster 1, H4e	NM_003545	HIST1H4E	6p21.3	---	8117402
3.48099	2.93287	3.50863		3.30749		3.95965	8.14139	7.50361		6.53488		97.578		kynurenine 3-monooxygenase (kynurenine 3-hydroxylase)	NM_003679	KMO	1q42-q44	mitochondrion // mitochondrial outer membrane // cytosol // membrane // integral to membrane	7910950
4.26172	4.38288	4.48297		4.37586		10.2531	8.58818	7.09235		8.64454		97.5508		nephronectin	NM_001033047	NPNT	4q24	extracellular region // proteinaceous extracellular matrix // membrane	8096704
3.2094	3.32241	3.31847		3.28343		3.92428	10.303	5.1698		6.46569		96.919		transmembrane protease, serine 11E	NM_014058	TMPRSS11E	4q13.2	extracellular region // plasma membrane // integral to plasma membrane	8095380
3.82869	4.12066	3.73661		3.89532		10.2744	2.99724	9.61651		7.62937		95.8601		neuropeptide Y receptor Y1	NM_000909	NPY1R	4q31.3-q32	plasma membrane // integral to plasma membrane	8103494
3.24784	3.35896	3.35633		3.32104		4.02833	10.1946	5.20981		6.47758		95.0464		transmembrane protease, serine 11E	NM_014058	TMPRSS11E	4q13.2	extracellular region // plasma membrane // integral to plasma membrane	8095364
4.66268	4.65113	4.4357		4.58317		10.8065	4.09795	11.8254		8.90993		94.4056		neural cell adhesion molecule 2	NM_004540	NCAM2	21q21.1	plasma membrane // integral to membrane	8067985
5.21884	4.4127	3.28283		4.30479		9.18393	8.26599	7.61878		8.35623		94.1146		zinc finger protein 730	AK131472	ZNF730	19p12	intracellular // nucleus	8027348
5.29478	4.65113	5.14503		5.03031		10.156	9.3103	9.77644		9.74758		93.7768		cadherin 3, type 1, P-cadherin (placental)	NM_001793	CDH3	16q22.1	plasma membrane // cell-cell adherens junction // integral to membrane	7996819
4.0153	2.4777	3.73661		3.40987		8.09239	5.82942	5.85813		6.59331		93.3597		transmembrane phosphatase with tensin homology	NM_199261	TPTE	21p11	membrane // integral to membrane	8069472
3.94156	3.43248	4.17277		3.84894		8.24284	5.48746	8.46763		7.39931		92.2431		phospholipase C, beta 4	NM_000933	PLCB4	20p12	---	8060897
4.96641	4.15504	4.87803		4.66649		9.28755	8.27082	9.04987		8.86941		90.0661		histone cluster 1, H4d	NM_003539	HIST1H4D	6p21.3	---	8124413
3.79073	3.35896	4.03194		3.72721		9.16975	3.4991	8.52359		7.06415		89.5291		phospholipase C, beta 1 (phosphoinositide-specific)	NM_182734	PLCB1	20p12	nucleus // cytoplasm // plasma membrane	8060854
3.09475	3.72579	3.43239		3.41764		11.3424	2.80802	5.28144		6.47729		89.525		---	---	---	---	---	8043502
5.88884	4.85995	4.55673		5.10184		5.48963	12.3404	11.158		9.66266		89.3957		alpha-2-glycoprotein 1, zinc-binding	NM_001185	AZGP1	7q22.1	extracellular region // membrane // MHC class I protein complex	8141374
5.17958	4.56419	5.10134		4.94837		9.71571	7.84429	10.5253		9.36177		89.189		stanniocalcin 2	NM_003714	STC2	5q35.1	extracellular region	8115851
3.91419	3.17951	3.39436		3.49602		3.50206	10.1486	6.15487		6.60183		88.8386		claudin 8	NM_199328	CLDN8	21q22.11	endoplasmic reticulum // plasma membrane // tight junction // integral to membrane // cell junction	8069795
5.43477	5.20959	5.93974		5.52803		9.32852	10.3727	11.5883		10.4298		88.6717		KIAA1324	NM_020775	KIAA1324	1p13.3	cellular_component // membrane // integral to membrane	7903592
3.82778	2.86312	3.31847		3.33646		6.34726	6.25105	6.25747		6.28526		88.3813		zinc finger protein 285A	NM_152354	ZNF285A	---	intracellular // nucleus	8037459
3.24784	2.79544	2.98414		3.00914		4.16294	5.48746	7.33097		5.66046		88.1087		---	---	---	---	---	8027332
4.36135	3.72758	4.24099		4.10997		6.76727	7.44181	8.83607		7.68171		86.9043		interleukin 17 receptor B	NM_018725	IL17RB	3p21.1	extracellular region // cytoplasm // plasma membrane // integral to plasma membrane // cell surface	8080562
4.08474	4.0513	4.34006		4.1587		5.61804	7.51062	10.1865		7.77172		86.8786		N-acetylated alpha-linked acidic dipeptidase-like 2	NM_207015	NAALADL2	3q26.31	membrane // integral to membrane	8083978
5.81389	5.00069	5.56626		5.46028		8.66509	10.5989	11.2252		10.1631		86.127		creatine kinase, mitochondrial 1A	NM_001015001	CKMT1A	15q15	mitochondrion // mitochondrial inner membrane // membrane	7983239
5.81389	5.00069	5.56626		5.46028		8.66509	10.5989	11.2252		10.1631		86.127		creatine kinase, mitochondrial 1A	NM_001015001	CKMT1A	15q15	mitochondrion // mitochondrial inner membrane // membrane	7983256
5.93746	5.84743	6.36483		6.04991		11.8078	11.905	10.0686		11.2605		86.1262		FXYD domain containing ion transport regulator 3	NM_021910	FXYD3	19q13.12	integral to plasma membrane // membrane // chloride channel complex	8027748
3.48099	4.01633	3.81174		3.76969		5.2454	3.76755	11.9392		6.98405		85.2689		G antigen 12C	NM_001098408	GAGE12C	Xp11.23	---	8167560
3.48099	4.32077	4.83023		4.21066		5.3082	5.41812	12.5982		7.77486		84.6469		prolactin-induced protein	NM_002652	PIP	7q34	extracellular region	8136839
5.40102	4.95518	5.47189		5.27603		10.878	9.85621	8.41365		9.71596		84.1527		family with sequence similarity 83, member B	NM_001010872	FAM83B	6p12.1	---	8120335
4.29197	3.54323	3.69877		3.84466		7.31672	4.3762	9.40659		7.03317		82.9336		PDZ domain containing 1	NM_002614	PDZK1	1q21	nucleus // cytoplasm // mitochondrion // membrane // brush border membrane	7904843
5.01169	4.04795	4.87727		4.64564		7.90945	6.33564	11.2362		8.49376		82.8331		insulin-like growth factor binding protein 5	NM_000599	IGFBP5	2q33-q36	extracellular region // insulin-like growth factor binding protein complex	8058857
4.42534	3.87342	4.30759		4.20212		7.77433	5.72419	9.49786		7.66546		82.419		synaptonemal complex protein 2	NM_014258	SYCP2	20q13.33	lateral element // nucleus	8067305
4.71396	3.76418	4.99087		4.48967		8.5465	3.88878	11.9121		8.11579		80.7656		progesterone receptor	NM_000926	PGR	11q22-q23	nucleus // cytoplasm	7951165
5.01169	4.15504	4.8286		4.66511		9.89623	7.51462	7.82659		8.41248		80.3275		doublecortin domain containing 2	NM_016356	DCDC2	6p22.1	---	8124196
4.36135	3.72758	5.10372		4.39755		10.6679	7.99358	5.0881		7.91654		80.0215		histone cluster 1, H3g	NM_003534	HIST1H3G	6p21.3	---	8124440
5.46774	4.28851	4.17277		4.64301		6.2081	8.02715	10.8226		8.35261		79.8965		ankyrin repeat domain 22	NM_144590	ANKRD22	10q23.31	---	7934898
4.85916	4.69277	5.10134		4.88442		7.00483	9.08112	10.23		8.77197		79.5908		keratin 23 (histone deacetylase inducible)	NM_015515	KRT23	17q21.2	intermediate filament	8015133
4.15781	4.0035	4.49621		4.21917		8.34608	6.76208	7.46343		7.52386		78.3255		zinc finger protein 732	NM_001137608	ZNF732	4p16.3	---	8098745
3.97843	4.0513	4.10305		4.04426		7.98123	6.43213	7.12418		7.17918		77.5153		chromosome 2 open reading frame 15	BC021264	C2orf15	2q11.2	---	8043835
4.36135	3.87342	4.72495		4.31991		4.59424	10.1521	8.22885		7.6584		77.2815		crystallin, alpha B	NM_001885	CRYAB	11q22.3-q23.1	soluble fraction // insoluble fraction // cytoplasm // plasma membrane // Z disc // contractile fiber	7951662
4.28758	3.28613	3.6983		3.75734		7.59932	6.0844	6.29118		6.6583		77.208		activating transcription factor 7 interacting protein 2	NM_024997	ATF7IP2	16p13.13	nucleus	7993167
3.79073	4.28851	5.10372		4.39432		8.05491	3.85357	11.4362		7.78156		77.0821		chemokine (C-X-C motif) ligand 12 (stromal cell-derived factor 1)	NM_000609	CXCL12	10q11.1	extracellular region // extracellular space	7933194
3.24784	3.87342	3.13083		3.41737		4.22863	4.01894	9.83764		6.0284		76.4049		growth hormone receptor	NM_000163	GHR	5p13-p12	extracellular region // extracellular space // extracellular space // plasma membrane // integral to plasma membrane // cell surface // growth hormone receptor complex	8105121
3.74814	3.24957	3.77418		3.59063		6.73826	5.4383	6.82257		6.33304		76.3769		chromosome 6 open reading frame 165	BC035083	C6orf165	6q15	---	8121015
5.9112	5.47131	5.97441		5.78564		10.9817	12.0677	7.56344		10.2043		76.3727		S100 calcium binding protein A14	NM_020672	S100A14	1q21.3	cytoplasm	7920297
3.86664	3.50626	4.03194		3.80161		4.64994	7.8193	7.5925		6.68725		75.9056		hypothetical protein FLJ20184	NM_017700	FLJ20184	4q24	intracellular	8096682
4.60611	3.35896	4.17277		4.04595		4.80782	8.42569	8.08218		7.10523		75.6135		hypothetical protein LOC100288114	AK302988	LOC100288114	19q13.43	---	8031646
5.05565	4.73224	4.75168		4.84652		8.33284	7.85041	9.32701		8.50342		75.4542		kelch-like 9 (Drosophila)	NM_018847	KLHL9	9p22	---	8160405
6.45013	5.88247	6.56011		6.29757		9.88348	10.8379	12.4057		11.0424		75.3431		mucin 1, cell surface associated	NM_001018016	MUC1	1q21	extracellular region // nucleus // cytoplasm // plasma membrane // integral to plasma membrane	7920642
5.3479	5.28549	5.3352		5.32286		9.85107	8.71119	9.41751		9.32659		75.2176		tetratricopeptide repeat domain 39A	NM_001144832	TTC39A	1p32.3	cellular_component	7916024
6.43345	6.20472	5.87845		6.17221		10.71	10.5406	11.0637		10.7714		74.5153		tandem C2 domains, nuclear	NM_001128596	TC2N	14q32.12	nucleus	7980891
3.48099	2.86312	3.13122		3.15844		2.82508	2.72016	10.9746		5.50663		74.3463		butyrylcholinesterase	NM_000055	BCHE	3q26.1-q26.2	extracellular region // nuclear envelope lumen // endoplasmic reticulum // membrane	8091867
4.71657	4.22249	4.94775		4.62893		7.91228	9.52783	6.72775		8.05595		74.0346		integrin, beta 6	NM_000888	ITGB6	2q24.2	integrin complex // membrane // integral to membrane	8056184
3.09475	2.72946	2.8414		2.88854		2.98648	2.58732	9.49986		5.02455		73.9479		small nucleolar RNA, C/D box 116-14	NR_003329	SNORD116-14	15q11.2	---	7981976
5.77339	4.93032	5.39893		5.36755		11.7238	8.41512	7.83875		9.32588		73.7458		sulfatase 2	NM_018837	SULF2	20q12-q13.2	extracellular space // endoplasmic reticulum // Golgi apparatus // Golgi stack // cell surface	8066822
5.17958	4.44168	5.0702		4.89715		10.576	7.97237	6.94087		8.4964		73.4968		bone morphogenetic protein 7	NM_001719	BMP7	20q13	extracellular region // extracellular space	8067185
3.94156	3.94532	4.37252		4.08647		6.64285	10.7218	3.88405		7.08291		73.3261		membrane metallo-endopeptidase	NM_007288	MME	3q25.1-q25.2	plasma membrane // integral to plasma membrane	8083494
3.55894	3.10584	3.43239		3.36572		7.76163	5.28033	4.4341		5.82535		73.0787		microseminoprotein, beta-	NM_002443	MSMB	10q11.2	extracellular region // extracellular space // nucleus	7927529
6.43345	5.76816	6.21635		6.13932		10.2639	10.7	10.8777		10.6139		72.8833		histone cluster 1, H3d	NM_003530	HIST1H3D	6p21.3	---	8124416
4.76962	4.97794	5.16512		4.97089		8.32155	9.37275	8.04163		8.57864		72.5775		transmembrane protease, serine 2	NM_001135099	TMPRSS2	21q22.3	extracellular region // cytoplasm // plasma membrane // integral to plasma membrane	8070467
5.21936	4.70574	5.50404		5.14305		8.91268	9.69847	7.98872		8.86662		72.4002		grainyhead-like 1 (Drosophila)	NM_198182	GRHL1	2p25.1	nucleus // nucleolus // cytoplasm // Golgi apparatus	8040190
3.28655	3.10584	3.6229		3.33843		6.66419	4.35347	6.24792		5.75519		72.3921		ankyrin repeat domain 34B	NM_001004441	ANKRD34B	5q14.1	nucleus // cytoplasm	8112896
5.25756	4.22249	5.56626		5.01543		6.35633	7.99358	11.5873		8.64574		72.3827		E74-like factor 5 (ets domain transcription factor)	NM_198381	ELF5	11p13-p12	nucleus	7947481
5.46774	4.53689	5.06123		5.02195		7.20878	11.8606	6.88272		8.65071		72.258		vestigial like 1 (Drosophila)	NM_016267	VGLL1	Xq26.3	nucleus	8170179
5.7338	5.65761	5.55087		5.64743		9.96205	8.30542	10.8919		9.71978		72.1098		v-erb-b2 erythroblastic leukemia viral oncogene homolog 3 (avian)	NM_001982	ERBB3	12q13	extracellular region // extracellular space // plasma membrane // integral to plasma membrane // basolateral plasma membrane // apical plasma membrane // lateral plasma membrane // receptor complex	7956120
5.49962	4.80934	5.55087		5.28661		10.9968	6.63462	9.65278		9.09472		72.0331		phosphatidylinositol-3,4,5-trisphosphate-dependent Rac exchange factor 1	NM_020820	PREX1	20q13.13	intracellular // cytoplasm // cytosol // plasma membrane	8066848
3.82869	3.50631	3.6229		3.65263		7.91246	6.09511	4.83427		6.28061		71.9476		fibronectin leucine rich transmembrane protein 3	NM_198391	FLRT3	20p11	proteinaceous extracellular matrix // integral to plasma membrane // membrane	8065071
3.40304	3.28585	3.28061		3.32317		3.39633	3.03608	10.6987		5.71037		71.8353		small nucleolar RNA, C/D box 116-17	NR_003332	SNORD116-17	15q11.2	---	7981982
3.40304	3.28585	3.28061		3.32317		3.39633	3.03608	10.6987		5.71037		71.8353		small nucleolar RNA, C/D box 116-17	NR_003332	SNORD116-17	15q11.2	---	7981986
4.41064	4.5054	4.61367		4.50991		7.75042	7.09597	8.38157		7.74265		71.681		growth factor receptor-bound protein 14	NM_004490	GRB14	2q22-q24	cytoplasm // endosome // microsome // Golgi apparatus // plasma membrane	8056327
4.60611	3.94532	4.72495		4.42546		7.64336	7.84463	7.27618		7.58806		71.4635		zinc finger protein 229	NM_014518	ZNF229	19q13.31	intracellular // nucleus	8037467
5.56237	5.00069	6.15748		5.57351		9.65451	9.23329	9.7194		9.53573		71.0902		H2A histone family, member Y2	NM_018649	H2AFY2	10q22	nucleosome // Barr body // nucleus // chromosome	7928107
5.77484	4.01633	5.1618		4.98432		5.66796	9.88934	10.0117		8.52301		70.9965		olfactomedin-like 3	NM_020190	OLFML3	1p13.2	extracellular region	7904158
4.36135	3.65398	3.58487		3.86673		9.91876	5.55038	4.35684		6.60866		70.9108		N-terminal EF-hand calcium binding protein 1	NM_022351	NECAB1	8q21.3	cytoplasm	8147244
4.01463	3.58014	3.243		3.61259		7.33868	7.42609	3.74085		6.16854		70.7511		fucosyltransferase 9 (alpha (1,3) fucosyltransferase)	NM_006581	FUT9	6q16	Golgi apparatus // membrane // integral to membrane	8121152
4.08769	3.50626	4.55673		4.05023		9.58107	4.51701	6.62945		6.90918		70.5874		relaxin 2	NM_134441	RLN2	9p24.1	extracellular region	8159977
4.15861	3.72758	3.66093		3.84904		6.61369	6.33741	6.74155		6.56422		70.5417		family with sequence similarity 190, member A	NM_001145065	FAM190A	4q22.1	---	8096425
3.75025	4.38288	4.20362		4.11225		6.14705	6.31354	8.56765		7.00941		70.4519		protocadherin beta 8	NM_019120	PCDHB8	5q31	plasma membrane // integral to membrane	8108713
5.18012	4.81011	5.37093		5.12039		11.3123	4.51701	10.3186		8.71595		70.2205		GREB1 protein	NM_014668	GREB1	2p25.1	membrane // integral to membrane	8040292
3.90301	3.69078	4.57506		4.05628		7.12853	6.13642	7.40403		6.88966		69.8516		zinc finger protein 233	NM_181756	ZNF233	19q13.31	intracellular // nucleus	8029423
5.04544	4.27661	4.98505		4.76903		9.61215	7.45353	7.22695		8.09754		69.7943		inhibitor of DNA binding 2, dominant negative helix-loop-helix protein	NM_002166	ID2	2p25	nucleus // nucleus // cytoplasm	8040103
3.71401	3.58014	3.81174		3.70196		7.05453	6.40707	5.39254		6.28471		69.767		histone cluster 1, H2bi	NM_003525	HIST1H2BI	6p21.3	---	8117429
3.71401	3.50626	4.24099		3.82042		8.82315	6.48966	4.09346		6.46875		69.3206		synaptotagmin-like 5	NM_138780	SYTL5	Xp21.1	membrane	8166747
4.01463	3.69078	4.06749		3.9243		5.67901	5.84068	8.38371		6.63447		69.0612		chromosome 4 open reading frame 18	NM_001128424	C4orf18	4q32.1	Golgi apparatus // membrane // integral to membrane	8103415
5.09832	3.94353	4.85177		4.63121		8.18235	5.98553	9.31909		7.82899		69.0485		fibroblast growth factor receptor 2	NM_000141	FGFR2	10q26	extracellular region // plasma membrane // plasma membrane // cell surface // integral to membrane	7936734
5.38375	5.20751	5.08247		5.22458		10.9364	5.73007	9.8128		8.82642		68.9404		apolipoprotein D	NM_001647	APOD	3q26.2-qter	extracellular region // extracellular space // intracellular	8092970
5.98291	5.38582	6.17741		5.84871		9.98262	10.2771	9.36898		9.87623		68.8615		microtubule-associated protein 7	NM_003980	MAP7	6q23.3	cytoplasm // microtubule // microtubule associated complex // plasma membrane // basolateral plasma membrane // perinuclear region of cytoplasm	8129783
5.91279	4.65113	5.59639		5.38677		9.54088	8.48634	9.24675		9.09132		68.7714		homeobox C13	NM_017410	HOXC13	12q13.3	nucleus	7955845
5.25707	4.53354	5.05871		4.94978		10.1755	5.74899	9.13292		8.35248		68.7447		estrogen receptor 1	NM_000125	ESR1	6q25.1	nucleus // membrane // chromatin remodeling complex	8122843
5.92369	5.68647	6.23411		5.94809		10.8586	7.7993	11.4029		10.0203		68.4618		annexin A9	NM_003568	ANXA9	1q21	cytosol // cell surface	7905283
6.2337	6.39224	6.49787		6.3746		10.0031	10.5081	11.6803		10.7305		68.3322		suppression of tumorigenicity 14 (colon carcinoma)	NM_021978	ST14	11q24-q25	extracellular region // plasma membrane // integral to plasma membrane // extrinsic to plasma membrane	7945204
4.65361	3.72738	4.79828		4.39309		8.5189	8.75762	4.84486		7.37379		67.8498		transducin-like enhancer of split 4 (E(sp1) homolog, Drosophila)	NM_007005	TLE4	9q21.31	nucleus	8156060
4.66268	3.65398	4.10305		4.1399		6.9879	6.47351	7.38376		6.94839		67.8395		KIAA0040	NM_014656	KIAA0040	1q24-q25	---	7922474
5.81389	5.08781	6.00858		5.63676		7.73424	11.0285	9.61288		9.45854		67.8011		aldehyde dehydrogenase 3 family, member B2	NM_000695	ALDH3B2	11q13	---	7949882
2.76495	2.4777	2.47386		2.57217		2.64126	2.5446	7.75866		4.31484		67.7509		small nucleolar RNA, C/D box 116-21	NR_003335	SNORD116-21	15q11.2	---	7981990
5.46342	4.40867	4.96616		4.94608		6.57541	7.98443	10.2923		8.28405		67.4872		homeobox C10	NM_017409	HOXC10	12q13.3	nucleus // cyclin-dependent protein kinase activating kinase holoenzyme complex	7955858
4.60611	4.08628	4.67062		4.45434		4.85746	13.032	4.47991		7.45646		67.3978		caspase 14, apoptosis-related cysteine peptidase	NM_012114	CASP14	19p13.1	nucleus // cytoplasm	8026398
3.79073	2.96543	3.47051		3.40889		4.41795	7.10023	5.5553		5.69116		66.9507		centlein, centrosomal protein	NM_017738	CNTLN	9p22.2	centriole // membrane	8154449
6.38644	5.79158	6.14644		6.10815		11.5479	8.28299	10.7548		10.1952		66.9117		forkhead box A1	NM_004496	FOXA1	14q12-q13	nucleus	7978706
4.96641	4.90828	5.56626		5.14698		8.71401	8.08142	8.90991		8.56845		66.4751		histone cluster 1, H3f	NM_021018	HIST1H3F	6p22.2	nucleosome // nucleus // chromosome	8124437
5.01169	3.80079	4.49711		4.43653		5.0421	4.3877	12.7136		7.38113		66.3718		serpin peptidase inhibitor, clade A (alpha-1 antiproteinase, antitrypsin), member 6	NM_001756	SERPINA6	14q32.1	extracellular region // extracellular space	7981059
4.77047	3.94532	4.55673		4.42417		5.08503	8.23775	8.75156		7.35812		66.3162		methylthioadenosine phosphorylase	NM_002451	MTAP	9p21	cytoplasm	8154635
4.15861	3.54323	4.48911		4.06365		6.24772	7.43349	6.56867		6.74996		66.1058		endoplasmic reticulum protein 27	NM_152321	ERP27	12p12.3	endoplasmic reticulum // endoplasmic reticulum lumen	7961524
6.51182	5.52361	5.84252		5.95931		9.95118	9.4795	10.2645		9.89838		66.0993		transmembrane protein 30B	NM_001017970	TMEM30B	14q23.1	membrane // integral to membrane	7979524
4.15145	4.78442	5.2037		4.71319		8.97497	4.28103	10.2118		7.82258		65.9721		hairy/enhancer-of-split related with YRPW motif 2	NM_012259	HEY2	6q21	nucleus	8121850
3.1713	2.96543	3.16811		3.10161		5.37171	3.12869	6.93139		5.14393		65.847		anterior gradient homolog 3 (Xenopus laevis)	NM_176813	AGR3	7p21.1	extracellular region	8138392
3.86664	2.79544	3.05704		3.23971		3.60824	4.85127	7.63667		5.36539		65.6134		protein tyrosine phosphatase-like A domain containing 2	NM_001010915	PTPLAD2	9p21.3	membrane // integral to membrane	8160346
4.48747	3.58014	4.17277		4.08013		3.7498	8.56172	7.93667		6.7494		65.4213		gamma-aminobutyric acid (GABA) A receptor, alpha 3	NM_000808	GABRA3	Xq28	plasma membrane // integral to plasma membrane // cell junction // chloride channel complex // synapse // postsynaptic membrane	8175696
4.36135	3.58014	4.49711		4.1462		6.10707	6.38997	8.07685		6.85796		65.4035		microtubule-associated protein 2	NM_002374	MAP2	2q34-q35	cytoplasm // cytoskeleton // microtubule // microtubule associated complex	8047926
5.36265	4.92327	5.35242		5.21278		9.91002	6.67042	9.12788		8.56944		64.3929		serpin peptidase inhibitor, clade A (alpha-1 antiproteinase, antitrypsin), member 3	NM_001085	SERPINA3	14q32.1	extracellular region // intracellular // nucleus	7976496
3.86664	3.07029	3.58487		3.50727		7.64336	4.09795	5.55478		5.76536		64.3833		adenylate kinase 7	NM_152327	AK7	14q32.2	---	7976578
5.53151	3.72758	4.4357		4.56493		8.08178	6.84377	7.55464		7.4934		64.1514		zinc finger protein 429	NM_001001415	ZNF429	19p13.1	intracellular // nucleus	8027312
4.42162	4.22249	4.30675		4.31695		6.57589	6.8849	7.79117		7.08398		64.0968		ectonucleotide pyrophosphatase/phosphodiesterase 5 (putative function)	NM_021572	ENPP5	6p21.1-p11.2	extracellular region // membrane // integral to membrane	8126750
3.14356	3.21627	4.2681		3.54264		6.99158	3.80706	6.63808		5.81224		64.0651		hypothetical protein LOC201229	NM_001076680	LOC201229	17q11.2	---	8013567
3.14356	3.21627	4.2681		3.54264		6.99158	3.80706	6.63808		5.81224		64.0651		---	---	---	---	---	8180264
6.04994	5.585	6.09554		5.91016		9.2044	9.09767	10.7748		9.69229		63.9937		quinolinate phosphoribosyltransferase	NM_014298	QPRT	16p11.2	cellular_component // cytosol	7994609
4.54772	4.15504	4.8286		4.51045		7.5994	7.33863	7.23846		7.39216		63.8896		zinc finger protein 793	NM_001013659	ZNF793	19q13.12	intracellular // nucleus	8028254
4.82181	4.59485	4.92593		4.78086		9.11356	4.31923	10.0334		7.82207		63.6121		myosin ID	NM_015194	MYO1D	17q11-q12	myosin complex	8014115
4.68829	3.72738	4.36905		4.26157		9.37412	5.0658	6.44304		6.96099		63.3432		Purkinje cell protein 4	NM_006198	PCP4	21q22.2	nucleus // cytosol	8068651
5.81389	5.00069	5.68318		5.49925		7.79397	6.67049	12.4661		8.97684		63.2375		prolactin receptor	NM_000949	PRLR	5p13.2	extracellular region // cell surface // membrane // integral to membrane	8111490
5.65003	4.88412	5.75166		5.4286		8.62769	9.28045	8.67421		8.86078		63.2241		E74-like factor 3 (ets domain transcription factor, epithelial-specific )	NM_001114309	ELF3	1q32.2	nucleus // cytoplasm	7908793
3.71401	3.35896	4.10305		3.72534		7.53084	4.24813	6.45953		6.0795		63.1932		zinc finger protein 483	NM_133464	ZNF483	9q31.3	intracellular // nucleus	8157193
3.75025	3.28585	3.39436		3.47682		5.38995	4.85042	6.76125		5.66721		62.9998		chromosome 14 open reading frame 25	BC038110	C14orf25	14q21.1	---	7974008
3.32526	2.53878	3.66093		3.17499		8.78441	3.12869	3.59627		5.16979		62.8286		---	---	---	---	---	8180366
3.32526	2.53878	3.66093		3.17499		8.78441	3.12869	3.59627		5.16979		62.8286		---	---	---	---	---	8180367
2.98312	3.65386	3.39462		3.34387		9.15278	2.85357	4.32493		5.44376		62.7983		---	---	---	---	---	8043500
3.94097	4.08628	4.74961		4.25895		5.42043	8.80672	6.5546		6.92725		62.6515		fyn-related kinase	NM_002031	FRK	6q21-q22.3	intracellular // nucleus // cytoplasm	8129071
6.34437	5.42631	5.98599		5.91889		10.8618	6.45719	11.5603		9.62645		62.6393		anterior gradient homolog 2 (Xenopus laevis)	NM_006408	AGR2	7p21.3	extracellular region	8138381
7.16493	7.16962	7.30264		7.2124		11.7151	11.3596	12.0693		11.7147		62.4238		tetraspanin 13	NM_014399	TSPAN13	7p21.1	membrane fraction // integral to plasma membrane // membrane	8131600
4.08769	3.94532	3.66093		3.89798		3.46672	11.8556	3.66866		6.33032		62.4		glycine-N-acyltransferase-like 2	NM_145016	GLYATL2	11q12.1	mitochondrion	7948354
4.533	4.39264	5.23733		4.72099		5.24491	10.2049	7.53519		7.66166		62.2893		chondrosarcoma associated gene 1	NM_153478	CSAG1	Xq28	---	8170576
5.40102	5.17011	5.14503		5.23872		9.68813	5.85457	9.94545		8.49605		62.178		SID1 transmembrane family, member 1	NM_017699	SIDT1	3q13.2	membrane // integral to membrane	8081710
4.48747	4.08628	4.10305		4.2256		6.65722	6.37266	7.4919		6.84059		61.8847		transcription elongation factor A (SII) N-terminal and central domain containing	NM_152634	TCEANC	Xp22.2	nucleus	8166096
7.21193	6.91888	6.91147		7.01409		12.0115	12.0934	9.83132		11.3121		61.2764		CD24 molecule	NM_013230	CD24	6q21	membrane fraction // plasma membrane // external side of plasma membrane // anchored to membrane // anchored to external side of plasma membrane // microvillus membrane // membrane raft // cilium membrane	8177222
5.30901	4.49061	5.5764		5.12534		9.09382	6.44893	9.14708		8.22994		60.5737		solute carrier family 24 (sodium/potassium/calcium exchanger), member 3	NM_020689	SLC24A3	20p13	membrane // integral to membrane	8061227
3.55894	3.21329	3.88612		3.55278		4.537	3.59002	8.98586		5.70429		60.5584		cadherin 10, type 2 (T2-cadherin)	NM_006727	CDH10	5p14-p13	plasma membrane // integral to membrane	8111255
5.65117	4.70574	5.14503		5.16732		7.76109	7.94171	9.14722		8.28334		60.3026		interferon regulatory factor 6	NM_006147	IRF6	1q32.3-q41	nucleus	7924058
4.10804	3.50704	4.26937		3.96148		4.88014	8.73467	5.42609		6.34697		60.217		sclerostin domain containing 1	NM_015464	SOSTDC1	7p21.1	extracellular region // extracellular space	8138363
3.55894	3.28585	4.10305		3.64928		5.9291	6.64188	4.95564		5.8422		60.0919		---	---	---	---	---	8017104
3.01936	2.66468	2.70325		2.79576		2.98648	2.58732	7.84553		4.47311		59.9961		small nucleolar RNA, C/D box 116-24	NR_003338	SNORD116-24	15q11.2	---	7981996
4.08769	3.72758	3.50863		3.77463		3.82024	10.0551	4.2278		6.03438		59.8667		zinc finger protein 42 homolog (mouse)	NM_174900	ZFP42	4q35.2	intracellular // nucleus // cytoplasm	8098690
4.66178	3.87305	4.33834		4.29106		8.18157	6.80685	5.58515		6.85785		59.8173		transmembrane protease, serine 4	NM_019894	TMPRSS4	11q23.3	membrane // integral to membrane	7944164
4.9344	3.65386	4.66976		4.41934		7.07023	5.6247	8.48047		7.05846		59.7177		kelch-like 13 (Drosophila)	NM_033495	KLHL13	Xq23-q24	---	8174654
4.60611	4.01633	4.67062		4.43102		6.12785	5.80382	9.29463		7.07544		59.6796		tudor domain containing 5	NM_173533	TDRD5	1q25.2	---	7907749
5.69029	4.59401	4.9005		5.0616		7.46291	8.50507	8.27843		8.08214		59.6755		potassium channel, subfamily K, member 5	NM_003740	KCNK5	6p21	integral to plasma membrane // membrane	8126153
3.70917	3.00198	3.81137		3.50751		3.46686	9.58687	3.74085		5.5982		59.6062		desmocollin 3	NM_024423	DSC3	18q12.1	membrane fraction // plasma membrane // integral to membrane // desmosome	8022692
3.32526	2.93079	3.35633		3.20413		3.46672	3.12869	8.73134		5.10892		59.448		small nucleolar RNA, C/D box 116-8	NR_003323	SNORD116-8	15q11.2	---	7981964
5.57747	4.64368	5.51976		5.24697		8.44861	8.51909	8.11637		8.36136		59.3559		myosin VB	NM_001080467	MYO5B	18q21	myosin complex	8023267
5.69299	5.50566	6.12681		5.77515		10.5641	8.32616	8.68826		9.19283		59.179		ATPase, class II, type 9A	NM_006045	ATP9A	20q13.2	membrane // integral to membrane	8067055
4.42534	4.08628	4.4357		4.31577		4.64994	8.59568	7.35761		6.86774		59.1312		aldehyde dehydrogenase 1 family, member L2	NM_001034173	ALDH1L2	12q23.3	cytoplasm	7965979
3.32526	3.00006	3.35633		3.22721		3.60824	3.03608	8.72794		5.12409		58.7774		zinc finger protein 676	NM_001001411	ZNF676	19p12	intracellular // nucleus	8035825
4.39334	3.24957	3.50863		3.71718		6.32964	5.64851	5.72783		5.90199		58.7761		zinc finger protein 876 (pseudogene)	NR_027481	ZNF876P	4p16.3	intracellular // nucleus	8093332
5.18012	5.83292	6.17755		5.7302		10.7927	8.23296	8.23843		9.08804		58.5991		solute carrier family 16, member 6 (monocarboxylic acid transporter 7)	NM_004694	SLC16A6	17q24.2	membrane fraction // plasma membrane // integral to plasma membrane	8017843
5.60372	5.56918	5.42219		5.5317		8.6083	8.50492	9.1929		8.7687		58.5174		KIAA1797	NM_017794	KIAA1797	9p21	membrane // integral to membrane	8154574
5.49998	5.67246	5.96305		5.71183		9.36179	8.08674	9.69871		9.04908		58.427		protease, serine, 8	NM_002773	PRSS8	16p11.2	extracellular region // extracellular space // plasma membrane // integral to membrane	8001007
4.12161	4.5054	4.87803		4.50168		5.14708	4.17436	12.0576		7.12634		58.3041		G antigen 12C	NM_001098408	GAGE12C	Xp11.23	---	8167526
4.4675	4.28851	5.08875		4.61492		7.6247	7.14421	7.13871		7.30254		58.2376		carcinoembryonic antigen-related cell adhesion molecule 6 (non-specific cross reacting antigen)	NM_002483	CEACAM6	19q13.2	plasma membrane // plasma membrane // integral to plasma membrane // anchored to membrane	8029098
4.12315	3.28585	3.5845		3.6645		7.31225	3.67961	6.40076		5.79754		58.2082		premature ovarian failure, 1B	NM_024921	POF1B	Xq21.1-q21.2	---	8173869
2.94491	2.66468	4.03194		3.21384		3.67909	5.6399	5.93088		5.08329		58.1687		zinc finger protein 578	NM_001099694	ZNF578	19q13.41	intracellular // nucleus	8030944
4.29553	3.28585	4.06617		3.88252		9.00814	3.88219	5.52068		6.137		58.0677		sulfatase 1	NM_001128205	SULF1	8q13.2-q13.3	extracellular space // endoplasmic reticulum // Golgi apparatus // Golgi stack // cell surface	8146863
5.93673	5.00069	5.81715		5.58486		8.23329	8.34369	9.89937		8.82545		58.0245		chromosome 11 open reading frame 52	NM_080659	C11orf52	11q23.1	---	7943795
3.44202	2.66468	2.91277		3.00649		3.6083	2.89855	7.73473		4.74719		57.8983		Down syndrome critical region gene 8	NR_026839	DSCR8	21q22.2	cellular_component	8068570
4.48373	3.94488	4.63215		4.35359		5.3082	10.6061	4.70615		6.8735		57.8813		retinoic acid receptor responder (tazarotene induced) 1	NM_206963	RARRES1	3q25.32	membrane // integral to membrane	8091723
4.77047	3.80079	4.77759		4.44962		5.20691	7.2655	8.59248		7.02163		57.8031		---	---	---	---	---	8180198
3.24784	3.43248	3.28061		3.32031		6.12785	3.67961	5.88279		5.23009		57.518		protocadherin beta 4	NM_018938	PCDHB4	5q31	cytoplasm // plasma membrane // integral to plasma membrane	8108693
4.22792	3.43248	3.66093		3.77377		4.35621	7.15849	6.30389		5.93953		57.3897		chromosome 9 open reading frame 152	NM_001012993	C9orf152	9q31.3	---	8163181
4.26172	3.61559	3.58478		3.8207		6.77048	6.40974	4.85987		6.01336		57.3892		zinc finger protein 257	NM_033468	ZNF257	19q13	intracellular // nucleus	8027323
3.44202	3.07204	3.6983		3.40412		7.64692	2.853	5.56996		5.35663		57.3572		---	---	---	---	---	8040336
5.6174	4.8335	5.84054		5.43048		8.58076	8.20878	8.82473		8.53809		57.2252		synaptotagmin VII	NM_004200	SYT7	11q12-q13.1	lysosome // synaptic vesicle // membrane // integral to membrane // cell junction // cytoplasmic vesicle // synapse	7948588
4.52486	4.12066	4.20223		4.28258		4.72888	7.31611	8.14695		6.73065		57.1632		transient receptor potential cation channel, subfamily V, member 6	NM_018646	TRPV6	7q33-q34	plasma membrane // integral to plasma membrane	8143499
4.0153	4.22249	4.24099		4.15959		6.72698	4.31923	8.56227		6.53616		57.1347		homeobox B2	NM_002145	HOXB2	17q21-q22	nucleus	8016438
6.17501	5.97731	6.36425		6.17219		8.75131	9.67041	10.6439		9.68853		56.9707		potassium channel, subfamily K, member 2	NM_001017425	KCNK2	1q41	voltage-gated potassium channel complex // membrane // integral to membrane	7909730
4.48747	4.15504	4.8286		4.49037		6.12785	7.83202	7.13961		7.03316		56.6278		zinc finger protein 750	NM_024702	ZNF750	17q25.3	intracellular	8019541
3.78912	2.89668	3.99576		3.56052		5.94084	6.0414	4.67977		5.554		55.9886		family with sequence similarity 5, member C	NM_199051	FAM5C	1q31.1	extracellular region	7922994
3.63668	3.21329	3.81174		3.5539		3.46672	3.22162	9.93222		5.54019		55.8902		Rho GTPase activating protein 15	NM_018460	ARHGAP15	2q22.2-q22.3	intracellular // cytoplasm // membrane	8045563
5.1375	5.24357	5.62418		5.33509		8.20843	8.18653	8.54405		8.313		55.8176		solute carrier family 16, member 14 (monocarboxylic acid transporter 14)	NM_152527	SLC16A14	2q36.3	plasma membrane // integral to membrane	8059642
4.39334	3.94488	4.96616		4.43479		6.54531	7.81582	6.33952		6.90022		55.5927		tet oncogene 1	NM_030625	TET1	10q21	nucleus	7927876
6.04994	5.08781	4.97239		5.37005		9.0793	7.48271	8.49588		8.35263		55.5411		nebulette	NM_006393	NEBL	10p12	---	7932453
4.0515	3.21363	4.4357		3.90027		7.86311	4.05845	6.26495		6.06217		55.4293		DMC1 dosage suppressor of mck1 homolog, meiosis-specific homologous recombination (yeast)	NM_007068	DMC1	22q13.1	condensed nuclear chromosome // intracellular // nucleus // cytoplasm	8076094
4.36637	4.59401	4.875		4.61179		5.62549	7.62636	8.24119		7.16435		55.3485		Kruppel-like factor 8	NM_007250	KLF8	Xp11.21	intracellular // nucleus	8167912
4.57139	4.18876	4.92593		4.56203		7.06434	6.98006	7.1501		7.06483		54.8616		DnaJ (Hsp40) homolog, subfamily C, member 12	NM_021800	DNAJC12	10q22.1	---	7933933
4.39334	3.69047	4.47518		4.18633		4.22618	9.72339	5.4917		6.48042		54.7995		S100 calcium binding protein A8	NM_002964	S100A8	1q21	---	7920244
7.49913	7.24299	7.50624		7.41612		11.7554	10.1728	12.4718		11.4667		54.6185		trichorhinophalangeal syndrome I	NM_014112	TRPS1	8q24.12	intracellular // nucleus	8152453
3.32526	3.07029	4.10305		3.49953		6.58392	4.01894	5.61489		5.40592		54.4754		stearoyl-CoA desaturase (delta-9-desaturase)	NM_005063	SCD	10q24.31	endoplasmic reticulum // membrane // integral to membrane // nuclear membrane	7935776
4.60611	3.07029	4.67062		4.11568		6.71329	5.9036	6.44304		6.35331		54.3686		cardiomyopathy associated 5	NM_153610	CMYA5	5q14.1	cytoplasm // perinuclear region of cytoplasm	8106556
4.66268	4.01633	5.10372		4.59424		8.8763	4.85127	7.53143		7.08633		54.2438		---	---	---	---	---	7905077
5.59258	3.87342	4.61456		4.69352		6.58392	8.61788	6.50789		7.23657		54.182		angiomotin	NM_133265	AMOT	Xq23	actin filament // tight junction // lamellipodium // cell junction // cytoplasmic vesicle	8174576
4.84667	4.56419	4.74133		4.7174		4.75596	8.71205	8.31503		7.26101		53.9199		cytochrome P450, family 4, subfamily X, polypeptide 1	NM_178033	CYP4X1	1p33	endoplasmic reticulum // microsome // membrane	7901272
4.60611	4.59485	5.06123		4.75406		5.28291	4.3877	12.2612		7.31061		53.776		G antigen 12B	NM_001127345	GAGE12B	Xp11.23	---	8167508
5.05565	5.04488	5.29947		5.13333		6.97649	8.13885	8.56227		7.89253		53.7507		transmembrane protease, serine 13	NM_001077263	TMPRSS13	11q23	membrane // integral to membrane	7951987
4.08769	3.21329	3.58487		3.62862		5.80557	5.12363	5.80751		5.5789		53.7474		zinc finger protein 596	NM_001042416	ZNF596	8p23.3	intracellular // nucleus	8144230
6.36202	6.53918	6.48191		6.46103		9.82803	9.9598	9.92927		9.9057		53.3145		prostaglandin F2 receptor negative regulator	NM_020440	PTGFRN	1p13.1	endoplasmic reticulum // Golgi apparatus // membrane // integral to membrane	7904293
5.09591	4.33373	5.50369		4.97777		7.85322	7.76228	7.26196		7.62582		53.1974		homeobox A5	NM_019102	HOXA5	7p15-p14	nucleus	8138735
3.82332	3.76274	3.66074		3.74893		6.27239	5.19932	5.74283		5.73818		53.0618		zinc finger protein 726	BC046415	ZNF726	19p12	intracellular // nucleus	8027363
4.87153	3.72758	4.72495		4.44136		6.95339	5.80382	7.6221		6.7931		52.9511		ST8 alpha-N-acetyl-neuraminide alpha-2,8-sialyltransferase 6	NM_001004470	ST8SIA6	10p12.33	Golgi apparatus // membrane // integral to membrane // integral to Golgi membrane	7932407
4.60611	3.28585	4.17277		4.02158		4.59424	4.01894	9.80737		6.14018		52.6808		hypothetical LOC100133469	NR_027457	LOC100133469	---	---	7977447
3.32526	3.21329	3.81174		3.4501		8.80391	3.31456	3.66866		5.26237		52.5283		coiled-coil domain containing 83	NM_173556	CCDC83	11q14.1-q14.2	---	7942896
3.17096	2.93079	3.62122		3.24099		5.37255	2.9441	6.50221		4.93962		52.4107		neuropeptide Y receptor Y5	NM_006174	NPY5R	4q31-q32	plasma membrane // integral to plasma membrane	8098146
6.95715	7.29463	7.43781		7.22986		11.4517	11.3863	10.218		11.0187		52.4049		tumor protein D52-like 1	NM_001003395	TPD52L1	6q22-q23	cellular_component // cytoplasm // perinuclear region of cytoplasm	8121838
5.43322	4.35302	4.9717		4.91932		6.45004	7.35193	8.66378		7.48858		52.2281		interleukin 20 receptor, alpha	NM_014432	IL20RA	6q22.33-q23.1	membrane // integral to membrane	8129837
4.96641	5.00069	5.1852		5.05077		5.28291	7.17855	10.585		7.68214		52.0985		methyltransferase like 7A	NM_014033	METTL7A	12q13.12	---	7955441
4.73882	4.73062	5.08125		4.85023		5.30119	4.48287	12.3352		7.37309		52.0152		G antigen 4	NM_001474	GAGE4	Xp11.4-p11.2	---	8167482
4.73882	4.73062	5.08125		4.85023		5.30119	4.48287	12.3352		7.37309		52.0152		G antigen 12C	NM_001098408	GAGE12C	Xp11.23	---	8167562
5.01169	4.65113	5.1852		4.94934		8.1443	6.20678	8.2192		7.52343		52.0086		ATPase family, AAA domain containing 4	NM_024320	ATAD4	17q21.32	---	8016387
5.51574	5.12953	5.47189		5.37239		7.88936	8.29106	8.25506		8.14516		51.6114		ankyrin 3, node of Ranvier (ankyrin G)	NM_020987	ANK3	10q21	cytoplasm // cytoskeleton // basolateral plasma membrane	7933772
4.39288	4.0158	3.99458		4.13442		4.67701	9.16056	4.95838		6.26532		51.5403		ATPase type 13A5	NM_198505	ATP13A5	3q29	membrane // integral to membrane	8092769
6.10242	5.10867	5.77531		5.66213		6.15844	11.9738	7.57226		8.56816		51.3238		secretory leukocyte peptidase inhibitor	NM_003064	SLPI	20q12	extracellular region	8066493
3.82869	3.72738	3.88612		3.81406		5.54951	4.92132	6.8135		5.76144		51.0579		chromosome 21 open reading frame 34	NR_027790	C21orf34	21q21.1	---	8067932
3.01936	2.86257	2.98414		2.95536		3.05282	2.67442	7.65109		4.45945		50.8937		Prader-Willi/Angelman syndrome-5	NR_022008	PAR5	15q11-q13	---	7981943
4.36135	4.35302	4.8286		4.51432		6.9417	5.66855	7.81382		6.80802		50.8094		phenazine biosynthesis-like protein domain containing	NM_022129	PBLD	10pter-q25.3	cellular_component	7933982
5.98309	5.45948	5.68318		5.70858		7.56171	8.679	9.56607		8.60226		50.6899		poliovirus receptor-related 4	NM_030916	PVRL4	1q22-q23.2	extracellular region // plasma membrane // adherens junction // integral to membrane // cell junction	7921773
6.20462	5.98867	6.36383		6.1857		9.47771	7.97935	10.4818		9.31295		50.556		insulin-like growth factor binding protein 2, 36kDa	NM_000597	IGFBP2	2q33-q34	extracellular region // extracellular space	8048205
5.82525	5.67135	6.37275		5.95645		9.86836	8.18465	8.80851		8.95384		50.3218		v-myb myeloblastosis viral oncogene homolog (avian)	NM_001130173	MYB	6q22-q23	nucleus // nuclear matrix	8122202
5.25756	5.24803	5.93974		5.48178		6.04288	12.4343	6.20957		8.22893		50.1142		keratin 5	NM_000424	KRT5	12q12-q13	keratin filament	7963427
4.60611	4.08628	4.94066		4.54435		6.37383	8.23464	5.84559		6.81802		50.0329		storkhead box 1	NM_152709	STOX1	10q21.3-q22.1	nucleus // nucleolus // cytoplasm	7927915
4.71744	4.90828	4.61456		4.74676		7.72063	8.27549	5.35779		7.11797		49.9542		phosphodiesterase 5A, cGMP-specific	NM_001083	PDE5A	4q25-q27	cellular_component	8102532
3.32526	3.50626	3.28061		3.37071		3.18812	5.66855	6.30389		5.05352		49.9246		ankyrin repeat domain 30B // ankyrin repeat domain 30B	NM_001145029 // NM_001145029	ANKRD30B // ANKRD30B	18p11.21 // 18p11.21	cellular_component // cellular_component	8069499
4.96641	4.95518	5.68318		5.20159		7.93033	6.85628	8.60735		7.79799		49.9155		choline dehydrogenase	NM_018397	CHDH	3p21.1	mitochondrion // mitochondrial inner membrane	8088142
4.18345	3.7637	4.46108		4.13607		7.88175	5.40217	5.31092		6.19828		49.859		fatty acyl CoA reductase 2	NM_018099	FAR2	12p11.22	peroxisome // endoplasmic reticulum // membrane // integral to membrane	7954631
4.91971	4.56587	5.08247		4.85602		9.38938	8.37129	4.05902		7.27323		49.7776		chromosome 1 open reading frame 59	NM_144584	C1orf59	1p13.3	---	7918223
5.59258	5.322	5.68318		5.53259		7.42568	8.59195	8.82974		8.28246		49.7031		phospholipase C, eta 1	NM_001130960	PLCH1	3q25.31	cytoplasm // membrane	8091600
5.53697	5.19075	5.76743		5.49838		6.37121	12.0512	6.26605		8.2295		49.6714		keratin 10	NM_000421	KRT10	17q21	intermediate filament	8015104
5.33107	5.93077	6.04143		5.76776		8.29103	8.79719	8.78769		8.6253		49.5434		hook homolog 1 (Drosophila)	NM_015888	HOOK1	1p32.1	cytoplasm // cytoskeleton // microtubule // HOPS complex // FHF complex	7901765
6.1015	6.01966	6.32476		6.14864		6.49607	10.5458	10.5371		9.19301		49.5128		nuclear protein, transcriptional regulator, 1	NM_001042483	NUPR1	16p11.2	nucleus	8000574
6.25274	5.83292	6.44926		6.17831		9.87334	8.59195	9.18737		9.21755		49.1921		lethal giant larvae homolog 2 (Drosophila)	NM_001031803	LLGL2	17q24-q25	cytoplasm	8009844
4.66268	3.58014	4.37252		4.20511		4.80782	10.1909	3.8127		6.27047		49.1154		secretoglobin, family 2A, member 2	NM_002411	SCGB2A2	11q13	extracellular region	7940636
3.24811	2.60173	2.87682		2.90889		3.15642	4.87416	4.97702		4.33587		49.056		epithelial mitogen homolog (mouse)	NM_001013442	EPGN	4q13.3	extracellular region // integral to plasma membrane // membrane	8095723
5.25313	4.77501	5.06123		5.02979		7.95959	5.77175	8.74317		7.4915		48.9426		---	---	---	---	---	7997700
2.8715	2.86257	2.77172		2.83526		4.70409	2.67442	5.28568		4.2214		48.889		---	---	---	---	---	7992891
6.42152	5.32155	5.99693		5.91333		7.43083	10.438	8.52034		8.79639		48.7552		peptidyl arginine deiminase, type II	NM_007365	PADI2	1p36.13	cytoplasm	7912937
5.53151	5.35761	5.76505		5.55139		8.42597	8.51516	7.78794		8.24303		48.4858		ATPase, Ca++ transporting, type 2C, member 2	NM_014861	ATP2C2	16q24.1	membrane // integral to membrane	7997593
3.79073	3.50626	3.58487		3.62729		3.89024	4.69334	7.5699		5.38449		48.4441		chromosome 12 open reading frame 28	BC143553	C12orf28	12q15	extracellular region	7957092
4.77047	5.322	5.6259		5.23946		5.61267	10.202	7.51575		7.77679		48.4275		CSAG family, member 2	NM_001080848	CSAG2	Xq28	---	8175710
5.40102	4.22249	4.87803		4.83384		7.73424	8.2039	5.58515		7.17443		48.4208		---	---	---	---	---	8158684
5.53151	4.47726	5.01747		5.00875		8.03854	8.27549	5.97742		7.43048		48.3502		kallikrein-related peptidase 6	NM_002774	KLK6	19q13.3	extracellular region // nucleus // nucleolus // cytoplasm // mitochondrion // endoplasmic reticulum // microsome	8038683
6.12417	4.75554	5.59608		5.49193		9.58186	7.19749	7.65682		8.14539		48.3157		cellular retinoic acid binding protein 1	NM_004378	CRABP1	15q24	cytoplasm	7985159
6.27154	5.17011	6.03081		5.82415		10.2679	6.98713	8.63665		8.63055		48.1855		msh homeobox 2	NM_002449	MSX2	5q34-q35	nucleus // cytoplasm	8110084
5.47952	6.08749	6.09167		5.88623		8.65121	8.49269	8.98708		8.71033		47.978		MARVEL domain containing 3	NM_001017967	MARVELD3	16q22.2	membrane // integral to membrane	7997158
4.48747	4.65113	5.2243		4.78763		6.44179	6.91723	7.88878		7.0826		47.9354		proline dehydrogenase (oxidase) 1	NM_016335	PRODH	22q11.21	cellular_component // mitochondrion // mitochondrial inner membrane // mitochondrial matrix	8074335
5.09832	4.90828	5.10372		5.03678		8.03304	5.77776	8.53918		7.45		47.912		histone cluster 3, H2bb	NM_175055	HIST3H2BB	1q42.13	nucleosome // nucleus // chromosome	7910369
2.701	2.21974	2.34999		2.42357		4.65153	2.85357	3.23821		3.5811		47.7611		---	---	---	---	---	8121332
5.3479	4.75873	5.16401		5.09021		8.0322	6.4814	8.03895		7.51752		47.6857		grainyhead-like 3 (Drosophila)	NM_198173	GRHL3	1p36.11	nucleus	7898916
4.0515	4.0513	4.49621		4.19967		8.40967	2.89855	7.28543		6.19788		47.5803		zinc finger protein 597	NM_152457	ZNF597	16p13.3	intracellular // nucleus // nucleolus // cytoplasm	7998978
5.18012	4.90828	5.2243		5.10423		7.81334	6.55249	8.22403		7.52995		47.5236		histone cluster 3, H2a	NM_033445	HIST3H2A	1q42.13	nucleosome // nucleus // chromosome	7924888
4.28758	2.89988	4.84405		4.0105		7.44679	5.16936	5.12751		5.91456		47.4767		phospholipase A2, group X	NM_003561	PLA2G10	16p13.1-p12	extracellular region	7999588
5.78801	4.85995	4.8286		5.15885		6.69948	9.68801	6.42637		7.60462		47.4091		keratin 6B	NM_005555	KRT6B	12q12-q13	keratin filament	7963406
4.96641	4.70574	5.2243		4.96548		10.032	4.31923	7.60738		7.31952		47.408		signal peptide, CUB domain, EGF-like 2	NM_020974	SCUBE2	11p15.3	---	7946454
4.15861	3.61692	4.13791		3.97115		7.65697	4.69334	5.20981		5.85337		47.3975		POTE ankyrin domain family, member E	NM_001083538	POTEE	2q21.1	---	8055222
5.99227	4.41514	5.70677		5.37139		7.58796	7.47946	8.67948		7.91563		47.3664		sema domain, immunoglobulin domain (Ig), transmembrane domain (TM) and short cytoplasmic domain, (semaphorin) 4A	NM_022367	SEMA4A	1q22	membrane // integral to membrane	7906107
4.48747	4.25403	3.84809		4.19653		3.95965	9.16612	5.42609		6.18395		47.3587		mucin 15, cell surface associated	NM_001135091	MUC15	11p14.3	extracellular region // plasma membrane // integral to membrane	7947156
6.64014	6.06596	6.61666		6.44092		9.69555	9.13041	9.63311		9.48636		47.2827		CDP-diacylglycerol synthase (phosphatidate cytidylyltransferase) 1	NM_001263	CDS1	4q21.23	endoplasmic reticulum // membrane // integral to membrane	8096130
5.65117	4.90828	5.53548		5.36498		7.86994	8.16924	7.65109		7.89676		47.1908		spleen tyrosine kinase	NM_003177	SYK	9q22	cytoplasm // plasma membrane // B cell receptor complex // T cell receptor complex	8156321
4.63258	4.2555	4.16605		4.35138		8.28461	3.22162	7.69808		6.40144		47.1129		chromosome 6 open reading frame 97	NM_025059	C6orf97	6q25.1	---	8122827
6.17501	5.75492	6.29244		6.07413		8.36602	9.34621	9.08216		8.93146		47.0412		sodium channel, nonvoltage-gated 1 alpha	NM_001038	SCNN1A	12p13	membrane fraction // plasma membrane // external side of plasma membrane // integral to membrane // apical plasma membrane // cortical actin cytoskeleton // sodium channel complex	7960529
5.36477	4.47643	4.69779		4.84633		5.34885	8.70786	7.26086		7.10586		46.6234		patched domain containing 1	NM_173495	PTCHD1	Xp22.11	membrane // integral to membrane	8166447
5.18012	4.59485	5.10372		4.95957		8.63274	4.57803	8.58498		7.26525		46.4897		nudix (nucleoside diphosphate linked moiety X)-type motif 7	NM_001105663	NUDT7	16q23.1	peroxisome	7997332
5.34877	4.44661	4.64259		4.81266		8.06572	3.93275	9.15056		7.04968		46.482		v-erb-a erythroblastic leukemia viral oncogene homolog 4 (avian)	NM_005235	ERBB4	2q33.3-q34	membrane // integral to membrane // basolateral plasma membrane	8058627
4.51759	4.38449	3.99576		4.29928		4.29308	10.1465	4.44953		6.29638		46.452		histone cluster 1, H4l	NM_003546	HIST1H4L	6p22-p21.3	---	8124534
4.60611	3.43248	3.95958		3.99939		5.99844	6.91723	4.6526		5.85609		46.4246		transmembrane 4 L six family member 18	NM_138786	TM4SF18	3q25.1	membrane // integral to membrane	8091402
5.01169	4.22249	4.97239		4.73552		8.6218	5.08165	7.0981		6.93385		46.422		protocadherin beta 3	NM_018937	PCDHB3	5q31	plasma membrane // integral to plasma membrane	8108688
4.29553	3.39572	4.4664		4.05255		5.38832	7.40382	4.99846		5.9302		46.3326		solute carrier family 15 (H+/peptide transporter), member 2	NM_021082	SLC15A2	3q13.33	membrane fraction // integral to plasma membrane // membrane	8082012
5.49998	4.08628	4.55673		4.71433		6.95339	6.89316	6.83297		6.89317		46.2175		metallophosphoesterase 1	NM_023075	MPPE1	18p11.21	membrane // integral to membrane	8022326
5.908	5.21863	5.50264		5.54309		9.42479	5.56368	9.3026		8.09702		46.0742		4-aminobutyrate aminotransferase	NM_020686	ABAT	16p13.2	mitochondrion // mitochondrial matrix // 4-aminobutyrate transaminase complex	7993126
5.76166	5.75492	5.91604		5.81087		8.25234	7.49876	9.69698		8.48269		45.9796		cAMP responsive element binding protein 3-like 4	NM_130898	CREB3L4	1q21.3	nucleus // endoplasmic reticulum // Golgi apparatus // membrane // integral to membrane	7905677
3.71401	3.50626	3.2054		3.47522		5.16738	4.80047	5.24823		5.07203		45.9484		---	---	---	---	---	8147373
7.6018	7.0553	7.7773		7.47813		11.283	9.55816	11.8975		10.9129		45.9307		claudin 3	NM_001306	CLDN3	7q11.23	plasma membrane // integral to plasma membrane // tight junction // cell junction	8140140
4.08769	3.35896	4.30759		3.91808		5.97569	4.74787	6.42637		5.71664		45.9041		---	---	---	---	---	8083850
4.60611	4.08628	4.97239		4.55493		7.15917	5.55038	7.21923		6.64293		45.8404		immunoglobulin superfamily, member 5	NM_001080444	IGSF5	21q22.2	plasma membrane // tight junction // integral to membrane // cell junction	8068644
6.53482	6.49932	6.61144		6.54852		9.11479	8.71049	10.8219		9.54908		45.8203		membrane protein, palmitoylated 7 (MAGUK p55 subfamily member 7)	NM_173496	MPP7	10p12.1	adherens junction // tight junction // membrane // cell junction	7932765
4.18345	3.39606	4.24099		3.94016		5.65616	5.64851	5.93088		5.74518		45.8108		ectonucleoside triphosphate diphosphohydrolase 1	NM_001776	ENTPD1	10q24	plasma membrane // integral to plasma membrane	7929511
5.59258	4.65113	5.2243		5.156		7.3213	6.62736	8.58498		7.51122		45.6791		threonine synthase-like 2 (S. cerevisiae)	NM_018271	THNSL2	2p11.2	---	8043393
4.82181	4.90828	5.35328		5.02779		7.7379	7.00408	7.22926		7.32375		45.6653		placenta-specific 2 (non-protein coding)	BC036545	PLAC2	19p13.3	membrane // integral to membrane	8032965
3.44226	2.89668	3.6229		3.32061		4.77335	3.76659	5.96255		4.83416		45.5805		TPTE pseudogene	NR_001591	psiTPTE22	22q11.1	---	8071063
3.82869	3.39572	4.20532		3.80991		4.67701	3.8955	8.05137		5.54129		45.4443		ADP-ribosyltransferase 4 (Dombrock blood group)	NM_021071	ART4	12p13-p12	plasma membrane // anchored to membrane	7961507
6.39668	5.89439	6.39794		6.22967		9.50554	8.97745	8.68477		9.05592		45.3675		ladinin 1	NM_005558	LAD1	1q25.1-q32.3	extracellular region // basement membrane	7923347
5.1398	4.85995	5.37093		5.12356		5.31947	4.69334	12.3247		7.44585		45.3258		G antigen 12C	NM_001098408	GAGE12C	Xp11.23	---	8167577
5.1398	4.85995	5.37093		5.12356		5.31947	4.69334	12.3247		7.44585		45.3258		G antigen 12C	NM_001098408	GAGE12C	Xp11.23	---	8167584
4.22792	3.58014	4.30759		4.03855		6.80646	5.12363	5.64403		5.85804		45.053		POTE ankyrin domain family, member E	NM_001083538	POTEE	2q21.1	---	8045257
5.27521	4.78442	5.40497		5.15487		8.95688	4.92255	8.55059		7.47667		45.041		like-glycosyltransferase	NM_004737	LARGE	22q12.3	Golgi apparatus // membrane // integral to membrane // integral to Golgi membrane	8075637
5.25313	4.60649	5.56336		5.14099		9.16693	4.98245	8.213		7.45413		44.9939		histone cluster 1, H4f	NM_003540	HIST1H4F	6p21.3	---	8117422
7.31519	6.7682	7.68216		7.25518		10.2191	9.48152	11.8576		10.5194		44.9915		clusterin	NM_001831	CLU	8p21-p12	extracellular region // extracellular space // mitochondrion // aggresome // spherical high-density lipoprotein particle // perinuclear region of cytoplasm	8149927
4.821	4.11941	4.74961		4.56334		7.01594	5.26055	7.56585		6.61411		44.9402		FLJ25996 protein	BC151150	FLJ25996	3q29	---	8084923
5.09832	4.01633	4.72495		4.6132		10.4019	4.09795	5.55478		6.68487		44.9073		FRAS1 related extracellular matrix protein 2	NM_207361	FREM2	13q13.3	basement membrane // plasma membrane // integral to membrane	7968678
6.10303	6.0971	6.44888		6.21634		9.16719	7.92701	9.92579		9.00666		44.887		DEP domain containing 6	NM_022783	DEPDC6	8q24.12	intracellular	8148059
6.58597	6.28968	6.7786		6.55142		10.407	8.59187	9.4743		9.49106		44.8704		MARVEL domain containing 2	NM_001038603	MARVELD2	5q13.2	plasma membrane // tight junction // integral to membrane // cell junction	8105899
6.58597	6.28968	6.7786		6.55142		10.407	8.59187	9.4743		9.49106		44.8704		MARVEL domain containing 2	NM_001038603	MARVELD2	5q13.2	plasma membrane // tight junction // integral to membrane // cell junction	8177498
4.82181	4.28851	5.12089		4.74373		5.48963	8.08851	7.03198		6.87004		44.8234		chemokine binding protein 2	NM_001296	CCBP2	3p21.3	plasma membrane // integral to plasma membrane	8079117
4.0515	3.65386	3.84893		3.85143		5.79255	6.02084	4.90883		5.57408		44.7275		niacin receptor 2	NM_006018	NIACR2	12q24.31	plasma membrane // integral to plasma membrane	7967322
3.48099	3.1414	5.06123		3.89454		3.67909	8.93329	4.29303		5.63514		44.6932		aldehyde dehydrogenase 1 family, member A1	NM_000689	ALDH1A1	9q21.13	cytoplasm // cytosol	8161755
4.08769	3.72758	3.95958		3.92495		7.95379	2.9441	6.12941		5.67577		44.6073		nucleosome assembly protein 1-like 2	NM_021963	NAP1L2	Xq13	nucleus // chromatin assembly complex	8173600
3.79073	3.43248	4.37252		3.86524		4.537	3.67961	8.55077		5.58913		44.5997		cancer/testis antigen family 45, member A3	NM_001017435	CT45A3	Xq26.3	---	8170068
5.67959	4.81011	5.14503		5.21158		6.59888	10.0208	5.97742		7.53236		44.5313		alanyl (membrane) aminopeptidase	NM_001150	ANPEP	15q25-q26	soluble fraction // cytoplasm // ER-Golgi intermediate compartment // cytosol // plasma membrane // integral to plasma membrane	7991335
6.82742	5.34644	5.78669		5.98685		8.79695	7.33446	9.82458		8.652		44.5167		histone cluster 1, H2bg	NM_003518	HIST1H2BG	6p21.3	---	8124423
5.29965	4.22178	5.24468		4.92204		6.41468	6.71131	8.20645		7.11081		44.4689		mucin-like 1	NM_058173	MUCL1	12q	extracellular region // membrane	7955963
4.91306	4.12066	4.26937		4.43436		10.1312	4.24813	4.83576		6.40504		44.4412		ADAM metallopeptidase with thrombospondin type 1 motif, 19	NM_133638	ADAMTS19	5q31	extracellular region // proteinaceous extracellular matrix	8107823
4.48747	3.43248	3.43239		3.78411		4.47822	2.67442	9.22883		5.46049		44.3006		small nucleolar RNA, C/D box 116-20	NR_003334	SNORD116-20	15q11.2	---	7981988
5.1398	3.58014	4.77759		4.49918		6.58392	5.20411	7.67952		6.48918		44.2304		retinol binding protein 7, cellular	NM_052960	RBP7	1p36.22	cytoplasm	7897522
4.54772	4.08628	4.4357		4.35657		6.35633	5.24272	7.23846		6.27917		44.1312		katanin p60 subunit A-like 2	NM_031303	KATNAL2	18q21.1	microtubule	8021131
3.2094	2.76245	2.87793		2.94993		3.46686	4.60074	4.67818		4.24859		44.0235		ankyrin repeat domain 30B	NM_001145029	ANKRD30B	18p11.21	cellular_component	8020357
5.78801	5.35761	6.19735		5.78099		8.45504	7.2655	9.25031		8.32362		43.9826		---	---	---	---	---	8180278
4.39334	3.69078	4.13791		4.07401		6.89971	6.18712	4.5095		5.86544		43.9722		Zic family member 1 (odd-paired homolog, Drosophila)	NM_003412	ZIC1	3q24	intracellular // nucleus // cytoplasm	8083233
5.29291	4.90828	5.24033		5.14718		8.77045	5.09897	8.35095		7.40679		43.9001		breast carcinoma amplified sequence 1	NM_003657	BCAS1	20q13.2	cytoplasm	8067125
4.48653	5.03025	4.77678		4.76452		7.04635	6.48717	7.03395		6.85582		43.8933		glutamate dehydrogenase 2	NM_012084	GLUD2	Xq24-q25	cytoplasm // mitochondrion // mitochondrial matrix	8169711
4.54401	4.77971	4.26452		4.52941		6.01654	5.66855	7.86556		6.51688		43.8793		epoxide hydrolase 2, cytoplasmic	NM_001979	EPHX2	8p21-p12	soluble fraction // cytoplasm // peroxisome // cytosol	8145532
4.60611	4.15504	4.55673		4.43929		7.46704	6.10566	5.58515		6.38595		43.8506		zinc finger protein 572	NM_152412	ZNF572	8q24.13	intracellular // nucleus	8148276
5.87531	6.201	5.87873		5.98501		8.82948	8.6886	8.31017		8.60941		43.8495		trimethyllysine hydroxylase, epsilon	NM_018196	TMLHE	Xq28	mitochondrion // mitochondrial matrix // mitochondrial matrix	8176255
5.87871	5.44061	5.64037		5.65323		8.45221	7.72267	8.21434		8.12974		43.8071		immunoglobulin-like domain containing receptor 1	NM_175924	ILDR1	3q13.33	cytoplasm // cytosol // plasma membrane // integral to membrane	8089970
4.65464	3.21462	3.62262		3.83063		6.17972	3.73487	6.61111		5.50857		43.8033		carbonic anhydrase VIII	NM_004056	CA8	8q11-q12	cytoplasm	8150978
5.17958	4.62132	5.46859		5.08983		6.6422	5.59576	9.71243		7.3168		43.7533		solute carrier family 7 (cationic amino acid transporter, y+ system), member 8	NM_012244	SLC7A8	14q11.2	cytoplasm // plasma membrane // integral to plasma membrane	7977933
4.01263	3.21363	3.4706		3.56562		5.99773	4.8153	4.55827		5.12377		43.6993		---	---	---	---	---	8180205
3.40304	3.1414	3.13083		3.22509		4.75671	3.59002	5.55478		4.63384		43.6809		---	---	---	---	---	7944832
5.1566	4.15438	5.47153		4.9275		7.51457	7.29656	6.42676		7.07929		43.669		zinc finger protein 117	NM_015852	ZNF117	7q11.21	intracellular // nucleus	8139832
5.98146	4.35223	5.19103		5.17491		8.00496	6.67367	7.61095		7.42986		43.5747		chromosome 1 open reading frame 51	BC027999	C1orf51	1q21.2	---	7905154
5.39548	5.20009	5.44414		5.34657		7.91242	7.4062	7.70992		7.67618		43.5721		UL16 binding protein 1	NM_025218	ULBP1	6q25	endoplasmic reticulum // plasma membrane // anchored to membrane // MHC class I protein complex	8122724
3.67534	3.35916	4.24018		3.75823		4.35551	3.63482	8.18501		5.39178		43.4659		cancer/testis antigen family 45, member A1	NM_001017417	CT45A1	Xq26.3	---	8170052
5.95842	5.91885	6.45691		6.11139		9.31288	8.19367	8.76632		8.75762		43.3		TAF12 RNA polymerase II, TATA box binding protein (TBP)-associated factor, 20kDa	NM_001135218	TAF12	1p35.3	nucleus // nucleoplasm // transcription factor TFIID complex // nucleolus // cytoplasm // plasma membrane // transcription factor TFTC complex	7914218
5.11906	4.93032	4.74133		4.93024		6.51407	6.16662	8.5035		7.0614		43.2263		flavin containing monooxygenase 4	NM_002022	FMO4	1q23-q25	endoplasmic reticulum // microsome // membrane // integral to membrane // intrinsic to endoplasmic reticulum membrane	7907297
4.3107	3.72738	4.10305		4.04704		5.53692	6.14639	5.70034		5.79455		43.1798		acid phosphatase, prostate	NM_001099	ACPP	3q21-q23	extracellular region // lysosome // membrane	8082673
4.15861	3.58014	4.67062		4.13646		6.14834	5.61067	6.00014		5.91972		43.1107		fatty acid amide hydrolase 2	NM_174912	FAAH2	Xp11.21	membrane // integral to membrane	8167930
7.16243	6.74148	7.27036		7.05809		9.66876	10.025	10.6064		10.1		43.0987		serine peptidase inhibitor, Kunitz type 1	NM_181642	SPINT1	15q15.1	extracellular region // membrane fraction	7982829
3.63668	3.28585	4.10305		3.67519		4.29308	3.59002	7.88268		5.25526		42.9928		cancer/testis antigen family 45, member A6	NM_001017438	CT45A6	Xq26.3	---	8175353
4.15861	3.72758	3.81174		3.89931		7.88832	3.59002	5.24823		5.57553		42.9875		metallophosphoesterase domain containing 2	NM_001584	MPPED2	11p13	---	7947274
3.63647	3.14179	3.66018		3.47948		4.7304	4.20216	5.99146		4.97467		42.9716		zinc finger protein 679	NM_153363	ZNF679	7q11.21	intracellular // nucleus	8133042
3.75237	3.43248	4.24018		3.80834		4.50761	3.76659	8.06008		5.44476		42.9693		cancer/testis antigen family 45, member A4	NM_001017436	CT45A4	Xq26.3	---	8175336
4.29553	4.08628	4.72495		4.36892		5.28291	8.64336	4.81091		6.24573		42.9582		gap junction protein, alpha 5, 40kDa	NM_005266	GJA5	1q21.1	plasma membrane // connexon complex // integral to membrane // cell junction	7919340
3.01936	3.00006	3.28061		3.10001		3.25692	5.61067	4.41915		4.42891		42.8678		zinc finger protein 781	NM_152605	ZNF781	19q13.12	intracellular // nucleus	8036430
4.77047	5.04488	5.26237		5.02591		6.96498	7.5612	6.98875		7.17164		42.6936		Na+/H+ exchanger domain containing 2	NM_178833	NHEDC2	4q24	mitochondrion // membrane // integral to membrane	8102050
5.67959	5.17011	4.97239		5.27403		6.86951	7.0538	8.65107		7.52479		42.6763		family with sequence similarity 134, member B	NM_001034850	FAM134B	5p15.1	membrane // integral to membrane	8111136
2.72818	2.4777	2.63604		2.61397		2.98648	2.33642	5.85813		3.72701		42.5804		---	---	---	---	---	8139776
6.04994	4.75873	6.07428		5.62765		8.20912	7.06461	8.79768		8.0238		42.5783		arachidonate 15-lipoxygenase	NM_001140	ALOX15	17p13.3	cytoplasm // cytosol	8011680
5.19655	4.68557	4.69779		4.85997		6.61339	6.19695	7.97157		6.9273		42.538		B-cell linker	NM_013314	BLNK	10q23.2-q23.33	intracellular // cytoplasm // plasma membrane	7935270
4.22707	3.46955	4.24018		3.97893		6.66433	3.17515	7.17117		5.67022		42.5059		zinc finger protein 711	NM_021998	ZNF711	Xq21.1-q21.2	intracellular // nucleus	8168589
6.18839	5.89439	6.1741		6.08563		9.28293	7.99027	8.741		8.6714		42.4898		B-box and SPRY domain containing	NM_017688	BSPRY	9q32	intracellular // cytoplasm // membrane	8157300
2.80464	3.07204	4.03194		3.30287		5.38134	4.28998	4.44308		4.7048		42.4457		immunoglobulin kappa constant // immunoglobulin kappa constant	BC073772 // BC073772	IGKC // IGKC	2p12 // 2p12	extracellular region // extracellular region // extracellular region // extracellular region	8043436
7.28775	6.9658	7.16372		7.13909		10.2069	8.30772	11.9819		10.1655		42.3925		chromosome 9 open reading frame 150	NM_203403	C9orf150	9p23	---	8154381
4.36135	3.28585	4.10305		3.91675		6.18845	4.31923	6.20957		5.57242		42.2715		neuro-oncological ventral antigen 1	NM_002515	NOVA1	14q	nucleus // nucleolus	7978391
6.73137	6.44297	6.99301		6.72245		9.3397	9.72257	9.62572		9.56266		42.2496		Notch homolog 3 (Drosophila)	NM_000435	NOTCH3	19p13.2-p13.1	nucleus // plasma membrane // integral to membrane	8034940
5.29218	5.28502	5.38733		5.32151		5.64156	10.1174	6.9177		7.55888		42.044		CSAG family, member 2	NM_001080848	CSAG2	Xq28	---	8170580
4.91971	4.65113	3.88612		4.48565		4.99793	10.3036	3.8127		6.37142		42.0399		cytidine monophosphate-N-acetylneuraminic acid hydroxylase (CMP-N-acetylneuraminate monooxygenase) pseudogene	NR_002174	CMAH	6p21.32	cytoplasm	8124307
3.86664	4.11941	3.88566		3.95724		4.16294	7.83746	4.8606		5.62034		42.0268		guanylate cyclase 1, soluble, alpha 3	NM_000856	GUCY1A3	4q31.3-q33|4q31.1-q31.2	cytoplasm // guanylate cyclase complex, soluble	8097957
5.82525	5.75269	5.72189		5.76661		9.45395	7.36058	7.74798		8.1875		41.9812		DnaJ (Hsp40) homolog, subfamily A, member 4	NM_018602	DNAJA4	15q25.1	membrane	7985147
5.05501	4.28851	4.875		4.73951		6.48994	7.6479	6.04436		6.7274		41.9431		natriuretic peptide receptor C/guanylate cyclase C (atrionatriuretic peptide receptor C)	NM_000908	NPR3	5p14-p13	membrane fraction // membrane // integral to membrane	8104746
4.15861	3.21329	4.77759		4.04983		7.63612	4.01894	5.58515		5.74674		41.9006		RAB39B, member RAS oncogene family	NM_171998	RAB39B	Xq28	intracellular // plasma membrane	8176230
5.07698	4.41596	5.26237		4.91844		8.04672	6.49764	6.39242		6.97893		41.8932		dedicator of cytokinesis 8	NM_203447	DOCK8	9p24.3	---	8153959
4.79614	4.6735	5.63862		5.03609		7.11301	7.33838	6.9773		7.1429		41.8343		family with sequence similarity 113, member B	BC008360	FAM113B	12q13.11	---	7955045
6.87349	6.32195	6.95863		6.71803		8.93938	9.85154	9.78137		9.52409		41.7692		InaD-like (Drosophila)	NM_176877	INADL	1p31.3	cellular_component // plasma membrane // tight junction // apical plasma membrane // cell junction	7901804
5.18371	4.53689	4.83789		4.85283		5.65445	10.2075	4.77614		6.87936		41.7597		histone cluster 1, H1a	NM_005325	HIST1H1A	6p21.3	nucleosome // nucleus // chromosome	8124380
6.54301	5.7667	6.16668		6.1588		8.49833	8.37862	9.30468		8.72721		41.7032		protocadherin 1	NM_032420	PCDH1	5q32-q33	plasma membrane // integral to plasma membrane // cell-cell junction	8114767
6.66851	5.65648	6.12681		6.1506		8.89261	8.44411	8.79929		8.71201		41.6449		dermokine	NM_033317	DMKN	19q13.12	extracellular region // extracellular space	8036079
8.48081	7.74148	8.18677		8.13635		13.0571	9.19688	12.3086		11.5209		41.5976		GATA binding protein 3	NM_001002295	GATA3	10p15	nucleus	7926105
5.32706	5.44214	6.74353		5.83758		9.77092	7.8493	7.16472		8.26164		41.5253		aldo-keto reductase family 1, member C2 (dihydrodiol dehydrogenase 2; bile acid binding protein; 3-alpha hydroxysteroid dehydrogenase, type III)	NM_001354	AKR1C2	10p15-p14	cytoplasm	7931832
5.67959	5.40695	5.68072		5.58909		8.9568	4.50628	10.2643		7.90914		41.5104		solute carrier family 9 (sodium/hydrogen exchanger), member 2	NM_003048	SLC9A2	2q11.2	membrane // integral to membrane	8044080
3.13285	3.17807	3.99576		3.43556		5.1602	3.40683	6.01409		4.86037		41.4725		family with sequence similarity 154, member B	AK304339	FAM154B	15q25.2	---	7985398
5.57747	4.67844	5.43556		5.23049		6.88096	7.37382	7.92485		7.39321		41.3484		homeobox C11	NM_014212	HOXC11	12q13.3	nucleus	7955855
3.94156	3.80079	3.81174		3.85136		4.35621	5.66855	6.30389		5.44289		41.3237		CTAGE family, member 4	NM_198495	CTAGE4	7q35	cellular_component // membrane // integral to membrane	8136979
4.08769	3.43248	4.24099		3.92039		6.52247	4.80047	5.28568		5.53621		41.2159		POTE ankyrin domain family, member F	NM_001099771	POTEF	2q21.1	cytoplasm // cell cortex	8055153
7.58687	7.70045	7.99085		7.75939		10.9679	10.5146	11.3875		10.9567		41.2051		endoplasmic reticulum metallopeptidase 1	NM_024896	ERMP1	9p24	endoplasmic reticulum // membrane // integral to membrane	8159992
4.95513	4.2855	4.66976		4.63679		5.24343	7.00861	7.37989		6.54398		41.1315		gap junction protein, gamma 3, 30.2kDa	NM_181538	GJC3	7q22.1	plasma membrane // connexon complex // integral to membrane // cell junction // myelin sheath	8141371
6.30841	5.585	5.81715		5.90352		8.11338	7.8193	9.03619		8.32296		40.9829		EPH receptor B3	NM_004443	EPHB3	3q21-qter	integral to plasma membrane // membrane	8084524
4.29553	4.18739	4.61367		4.36553		6.00963	6.94666	5.50164		6.15264		40.9369		chromosome 5 open reading frame 23	BC022250	C5orf23	5p13.3	protein complex	8104758
4.82181	5.04488	5.47189		5.11286		6.14834	8.57691	6.88272		7.20266		40.8733		solute carrier family 44, member 3	NM_001114106	SLC44A3	1p21.3	membrane // integral to membrane	7903144
3.94156	2.79544	3.35633		3.36444		4.47822	4.4536	5.28568		4.73917		40.8605		---	---	---	---	---	8020347
3.01983	3.0361	3.02153		3.02582		3.36182	4.96938	4.44484		4.25868		40.7447		C-type lectin domain family 7, member A	NM_197947	CLEC7A	12p13.2	cytoplasm // membrane // integral to membrane	7961120
3.79073	3.87342	3.81174		3.8253		3.82024	8.23775	4.09346		5.38382		40.7424		prominin 1	NM_006017	PROM1	4p15.32	extracellular space // plasma membrane // integral to plasma membrane // brush border // cell surface // apical plasma membrane // stereocilium	8099476
5.73482	5.64361	6.33771		5.90538		8.60325	7.69598	8.63387		8.31103		40.7366		RAB11 family interacting protein 4 (class II)	NM_032932	RAB11FIP4	17q11.2	endosome // membrane	8006298
6.09223	5.88619	6.38		6.11947		9.51324	7.49983	8.82321		8.61209		40.7327		TBC1 domain family, member 30	AB449914	TBC1D30	12q14.3	intracellular	7956826
4.96641	4.08628	4.97239		4.67503		5.48963	4.85127	9.39233		6.57774		40.6996		preferentially expressed antigen in melanoma	NM_206953	PRAME	22q11.22	---	8074856
6.43013	5.92766	6.19967		6.18582		8.84935	8.36943	8.86721		8.69533		40.5687		trafficking protein particle complex 6A	NM_024108	TRAPPC6A	19q13.32	endoplasmic reticulum // Golgi apparatus	8037505
6.16495	5.55463	5.97233		5.8973		8.01165	7.35624	9.49082		8.28624		40.5089		ephrin-A3	NM_004952	EFNA3	1q21-q22	plasma membrane // integral to plasma membrane // anchored to membrane	7905918
3.67534	3.21329	3.54675		3.47846		4.16071	6.68397	3.8127		4.88579		40.4585		fibroblast activation protein, alpha	NM_004460	FAP	2q23	plasma membrane // integral to membrane // lamellipodium	8056257
3.79073	3.21329	4.17277		3.7256		5.85626	3.40716	6.42637		5.22993		40.3783		olfactory receptor, family 8, subfamily G, member 5	NM_001005198	OR8G5	11q24.2	plasma membrane // integral to membrane	7944838
6.99157	5.39237	6.36425		6.2494		8.17458	9.1003	9.03344		8.76944		40.3246		chromosome 6 open reading frame 35	NM_018452	C6orf35	6q25.3	membrane // integral to membrane	8130988
5.83931	4.59485	5.10372		5.17929		7.93623	5.31698	8.54306		7.26542		40.2783		chromosome 14 open reading frame 132	NR_023938	C14orf132	14q32.2	membrane // integral to membrane	7976556
5.48314	4.59401	5.7911		5.28942		7.74865	6.57534	7.93372		7.41924		40.2657		distal-less homeobox 3	NM_005220	DLX3	17q21	nucleus	8016609
5.59258	5.67246	5.86744		5.71083		9.08462	6.38997	8.5353		8.0033		40.1424		protocadherin beta 16	NM_020957	PCDHB16	5q31	membrane // integral to membrane	8108716
3.79073	4.15504	4.37252		4.1061		4.75671	6.80559	5.70061		5.7543		40.1405		glycine-N-acyltransferase-like 1	NM_080661	GLYATL1	11q12.1	mitochondrion	7940135
2.61376	3.18779	3.54576		3.11577		4.30308	3.89982	4.89254		4.36515		40.0986		---	---	---	---	---	8081546
4.29553	2.83013	3.84893		3.6582		4.14923	4.45236	6.76529		5.12229		40.0224		chloride channel accessory 2	NM_006536	CLCA2	1p31-p22	extracellular region // plasma membrane // integral to plasma membrane // cell junction	7902702
4.39334	4.81011	4.79348		4.66564		6.20797	6.00077	7.38996		6.5329		40.0214		zinc finger protein 610	NM_001161425	ZNF610	19q13.41	intracellular // nucleus	8030914
5.1398	4.59485	5.33564		5.02343		6.75396	6.56778	7.76159		7.02778		39.9		glutaminase 2 (liver, mitochondrial)	NM_013267	GLS2	12q13	mitochondrion // mitochondrial matrix	7964183
6.47985	6.3038	6.09554		6.29306		8.73786	8.01046	9.66357		8.80396		39.8995		---	---	---	---	---	8180270
4.98493	4.93173	5.58132		5.16599		7.73467	6.06249	7.88263		7.2266		39.8878		chromosome 14 open reading frame 174	AK292571	C14orf174	14q24.3	---	7975971
3.48099	3.43248	3.95958		3.62435		6.89398	3.40716	4.90883		5.06999		39.8869		---	---	---	---	---	7999384
6.19484	5.90692	6.41585		6.17254		8.69673	8.27082	8.90691		8.62482		39.7289		proline rich 15	NM_175887	PRR15	7p14.3	---	8132031
6.40882	5.79252	6.50823		6.23652		10.9657	5.6247	9.52914		8.70652		39.6053		calcium channel, voltage-dependent, gamma subunit 4	NM_014405	CACNG4	17q24	plasma membrane // integral to plasma membrane	8009334
6.4137	6.70046	6.23614		6.4501		8.16958	9.40059	9.43256		9.00091		39.5468		protocadherin beta 2	NM_018936	PCDHB2	5q31	plasma membrane // integral to plasma membrane	8108683
6.23792	5.22576	5.79134		5.75167		10.0229	5.42009	8.6079		8.01696		39.3848		hypothetical LOC399717	NR_024256	FLJ45983	10p14	---	7932014
4.60611	4.35302	5.01747		4.65887		8.64	4.17436	6.6583		6.49089		39.3232		protein kinase (cAMP-dependent, catalytic) inhibitor beta	NM_181794	PKIB	6q22.31	---	8121768
5.18012	4.75873	5.10372		5.01419		7.99961	6.47351	6.47583		6.98298		39.2645		glycerophosphodiester phosphodiesterase domain containing 3	NM_024307	GDPD3	16p11.2	membrane // integral to membrane	8000799
7.25165	6.3952	6.81776		6.82154		9.59378	9.16702	9.7296		9.4968		39.2179		myelin protein zero-like 2	NM_144765	MPZL2	11q24	cytoskeleton // membrane // integral to membrane	7952046
6.28058	6.32195	6.85649		6.48634		7.0653	9.60482	10.4136		9.0279		39.1832		sortilin-related receptor, L(DLR class) A repeats-containing	NM_003105	SORL1	11q23.2-q24.2	integral to plasma membrane // membrane // low-density lipoprotein particle	7944667
4.15861	3.35896	4.17277		3.89678		6.68553	3.93743	5.64403		5.42233		39.149		TP53 target 1 (non-protein coding)	AB007455	TP53TG1	7q21.1	---	8140739
6.01582	5.30282	6.14298		5.82054		8.71474	6.319	9.25144		8.09506		39.0774		NDRG family member 2	NM_201540	NDRG2	14q11.2	nucleus // cytoplasm // Golgi apparatus // centrosome // cytosol // perinuclear region of cytoplasm	7977621
3.82921	3.79824	4.51558		4.04767		5.87573	6.09619	4.91147		5.6278		39.0379		niacin receptor 1	NM_177551	NIACR1	12q24.31	plasma membrane // integral to membrane	7967318
3.9041	3.94353	4.23382		4.02715		4.46636	7.48161	4.83576		5.59457		38.9214		olfactomedin 4	NM_006418	OLFM4	13q14.3	extracellular region // extracellular space	7969288
4.36135	3.87342	4.24099		4.15859		6.02083	4.09795	7.20951		5.7761		38.8957		chromosome 1 open reading frame 88	NM_181643	C1orf88	1p13.2	---	7903959
6.63305	5.95423	6.92341		6.50356		9.40499	8.81974	8.87346		9.03273		38.889		RAB15, member RAS onocogene family	NM_198686	RAB15	14q23.3	plasma membrane	7979663
4.77047	4.95518	4.72495		4.81687		6.67144	6.0414	7.34878		6.68721		38.829		SH3 domain binding glutamic acid-rich protein	NM_007341	SH3BGR	21q22.3	cytosol	8068620
4.60611	4.08628	3.95958		4.21732		4.95247	6.5829	6.0225		5.85262		38.7758		hypothetical LOC728212	AK302783	LOC728212	22q11.21	---	8071161
5.1398	4.53689	5.73827		5.13832		6.39113	4.90036	10.0967		7.1294		38.7496		BCL2/adenovirus E1B 19kD interacting protein like	NM_001159642	BNIPL	1q21.3	nucleus // cytosol	7905308
8.06924	7.10474	7.41299		7.52899		11.0549	9.43017	10.8519		10.4457		38.7392		pre-B-cell leukemia homeobox 1	NM_002585	PBX1	1q23	nucleus // nucleolus // cytoplasm	7906954
5.21936	5.00069	5.37093		5.19699		5.48963	7.43349	8.70046		7.20786		38.6929		anoctamin 1, calcium activated chloride channel	NM_018043	ANO1	11q13.3	cytoplasm // plasma membrane // integral to membrane // chloride channel complex	7942135
5.31989	4.70574	4.9814		5.00234		5.97949	4.73919	10.0913		6.93668		38.6685		Xg blood group	NM_001141919	XG	Xp22.33	membrane // integral to membrane	8165808
6.74489	6.20948	6.77323		6.57587		8.77456	9.48757	9.09277		9.1183		38.6631		growth hormone regulated TBC protein 1	NM_024719	GRTP1	13q34	intracellular	7972890
6.78416	6.60307	6.91744		6.76822		9.36609	9.11305	9.67309		9.38408		38.6491		protein kinase C, eta	NM_006255	PRKCH	14q22-q23	---	7974835
2.62816	3.57964	3.02153		3.07644		5.05143	3.88878	3.84837		4.26286		38.5646		---	---	---	---	---	8041642
4.71744	4.47726	5.29947		4.83139		7.12857	6.08456	6.87044		6.69452		38.5631		histone cluster 1, H2al	NM_003511	HIST1H2AL	6p22-p21.3	---	8117608
5.36647	4.01633	4.77759		4.72013		5.55246	7.33863	6.728		6.5397		38.5491		carcinoembryonic antigen-related cell adhesion molecule 1 (biliary glycoprotein)	NM_001712	CEACAM1	19q13.2	extracellular region // membrane fraction // plasma membrane // plasma membrane // integral to plasma membrane	8037205
5.29478	4.15504	4.97239		4.80741		6.32068	7.35635	6.30389		6.66031		38.5426		transmembrane protease, serine 3	NM_024022	TMPRSS3	21q22.3	endoplasmic reticulum // endoplasmic reticulum membrane // membrane // integral to membrane	8070584
4.42534	3.1414	3.73661		3.76778		4.02833	7.03191	4.59665		5.21897		38.5155		palmdelphin	NM_017734	PALMD	1p22-p21	cytoplasm // membrane	7903227
4.14599	3.39572	4.05967		3.86713		4.98181	6.44067	4.63988		5.35412		38.4522		blood vessel epicardial substance	NM_147147	BVES	6q21	membrane // integral to membrane	8128553
6.36202	6.20948	6.17755		6.24968		9.24062	8.28939	8.42209		8.6507		38.4182		phosphoinositide-3-kinase, class 2, beta polypeptide	NM_002646	PIK3C2B	1q32	nucleus // cytoplasm // endoplasmic reticulum // microsome // cytosol // plasma membrane // phosphoinositide 3-kinase complex	7923662
5.43477	4.81011	5.81715		5.35401		8.19441	5.69664	8.33542		7.40882		38.3789		microtubule-associated protein tau	NM_016835	MAPT	17q21.1	cytoplasm // cytosol // cytoskeleton // microtubule // microtubule associated complex // plasma membrane // plasma membrane // axon // axon // growth cone // growth cone // cell projection // tubulin complex // tubulin complex	8007828
7.53336	7.0553	7.54212		7.37692		10.3987	10.0012	10.1762		10.192		38.1609		phosphoinositide-3-kinase, regulatory subunit 3 (gamma)	NM_003629	PIK3R3	1p34.1	phosphoinositide 3-kinase complex	7915787
4.87076	4.32077	5.31755		4.83636		6.1556	7.15835	6.71935		6.67777		38.0742		small proline-rich protein 1B (cornifin)	NM_003125	SPRR1B	1q21-q22	cornified envelope // cytoplasm	7905553
6.044	4.6735	5.62472		5.44741		6.57477	8.92758	7.06067		7.52101		38.0658		integrin, beta 8	NM_002214	ITGB8	7p21.1	integrin complex // membrane // integral to membrane	8131666
4.01263	3.8005	3.05704		3.62339		5.4399	4.0864	5.47512		5.00047		38.0054		chromosome 11 open reading frame 65	NM_152587	C11orf65	11q22.3	---	7951521
7.79447	7.51926	8.35999		7.89124		10.5516	11.4351	10.6834		10.89		38.0016		adaptor-related protein complex 1, mu 2 subunit	NM_005498	AP1M2	19p13.2	Golgi apparatus // cytosol // membrane // clathrin adaptor complex // cytoplasmic vesicle	8034084
5.41711	5.2278	5.35069		5.33187		7.69275	6.65702	7.72278		7.35751		37.9914		FYVE, RhoGEF and PH domain containing 4	NM_139241	FGD4	12p11.21	ruffle // intracellular // cytoplasm // Golgi apparatus // cytoskeleton // lamellipodium // filopodium	7954729
5.23745	5.5825	5.65483		5.49159		7.91732	7.36711	7.44665		7.57703		37.9751		mucin 20, cell surface associated	NM_152673	MUC20	3q29	extracellular region // plasma membrane // basal plasma membrane // apical plasma membrane // microvillus membrane // cell projection	8084895
5.15884	5.05923	6.49077		5.56961		9.16599	5.5732	8.29392		7.6777		37.8498		asparagine-linked glycosylation 1-like	NM_001015050	ALG1L	3q21.2	---	8090291
6.19484	5.6439	6.05271		5.96382		7.90045	7.8193	8.94253		8.22076		37.844		prominin 2	NM_144707	PROM2	2q11.1	plasma membrane // cilium // integral to membrane	8043522
7.06882	5.6439	6.62032		6.44435		8.22367	9.26881	9.15483		8.88244		37.833		chromosome 6 open reading frame 35	NM_018452	C6orf35	6q25.3	membrane // integral to membrane	8130464
4.0153	3.58014	4.37252		3.98932		4.537	3.85357	8.10332		5.49796		37.8171		cancer/testis antigen family 45, member A2	NM_152582	CT45A2	Xq26.3	---	8170060
5.33107	5.00069	5.84252		5.39143		8.32161	5.48746	8.47981		7.42963		37.8045		---	---	---	---	---	8180271
6.3265	5.68647	6.69865		6.23721		8.76686	8.20466	8.81187		8.59447		37.7935		sulfotransferase family, cytosolic, 2B, member 1	NM_004605	SULT2B1	19q13.3	cytoplasm // cytosol	8030067
5.33107	4.85995	5.73827		5.30976		6.53808	7.44181	7.95423		7.31137		37.6968		zinc finger protein 98 (F7175)	NM_001098626	ZNF98	19p12	intracellular // nucleus	8035831
4.0153	3.65398	4.30759		3.99229		5.45716	4.63676	6.39242		5.49545		37.6516		taxilin beta	NM_153235	TXLNB	6q24.1	cytoplasm	8129924
3.79073	3.35896	4.30759		3.81909		3.89024	7.2275	4.6526		5.25678		37.6447		protein tyrosine phosphatase, non-receptor type 20A	NM_001042389	PTPN20A	10q11.22	nucleus // cytoplasm // microtubule	7933263
5.73482	5.4919	5.1852		5.47064		8.05491	6.98713	7.54694		7.52966		37.6376		aminoglycoside phosphotransferase domain containing 1	NM_001013619	AGPHD1	15q25.1	cytoplasm	7985192
6.04994	5.45948	5.56626		5.69189		9.09521	7.39971	6.97735		7.82409		37.4603		sushi domain containing 4	NM_017982	SUSD4	1q41	membrane // integral to membrane	7924508
2.83537	2.96842	3.28283		3.02887		4.15409	4.24283	4.09346		4.16346		37.459		---	---	---	---	---	8097749
3.82869	3.35896	4.37165		3.8531		3.89024	7.2418	4.7566		5.29621		37.4534		protein tyrosine phosphatase, non-receptor type 20B	NM_001042357	PTPN20B	10q11.22	---	7933379
4.13087	3.61692	3.81137		3.85305		5.69825	6.00777	4.18198		5.296		37.4495		similar to high mobility group box 3	ENST00000451823	LOC729595	5q35.3	---	8110520
8.47676	8.57743	8.84355		8.63258		12.1289	12.1639	11.29		11.861		37.3976		epithelial cell adhesion molecule	NM_002354	EPCAM	2p21	plasma membrane // integral to membrane // basolateral plasma membrane // apical plasma membrane	8041853
3.74814	3.10832	4.61367		3.82338		5.08847	4.0559	6.61036		5.25157		37.3542		---	---	---	---	---	7980096
6.87349	6.45945	6.44926		6.59407		9.74135	8.48326	8.93666		9.05376		37.3015		allograft inflammatory factor 1-like	NM_031426	AIF1L	9q34.13-q34.3	focal adhesion // actin cytoskeleton	8158771
6.02379	4.85695	6.54369		5.80815		8.96671	7.10705	7.83026		7.96801		37.1868		zinc finger protein 138	NR_027660	ZNF138	7q11.21-q11.23	intracellular // nucleus	8133057
6.19484	5.28549	6.44926		5.97653		4.47822	9.62546	10.4858		8.19651		37.145		NLR family, pyrin domain containing 2	NM_017852	NLRP2	19q13.42	cytoplasm	8031398
6.2144	5.45948	6.49796		6.05728		6.86951	11.1673	6.88272		8.30652		37.1328		kallikrein-related peptidase 5	NM_012427	KLK5	19q13.3-q13.4	extracellular region // extracellular space	8038670
4.15781	3.72758	4.30759		4.06433		6.92398	4.66505	5.12922		5.57275		37.1137		POTE ankyrin domain family, member G	NR_027480	POTEG	14q11.2	---	7977456
3.79033	3.69078	4.33494		3.93868		5.65275	4.93575	5.60828		5.39893		37.0745		---	---	---	---	---	8096533
3.86664	3.90937	3.84893		3.87498		7.77359	3.44812	4.70695		5.30955		37.0214		glycine receptor, alpha 3	NM_006529	GLRA3	4q33-q34	plasma membrane // integral to membrane // cell junction // chloride channel complex // synapse // postsynaptic membrane	8103778
4.96641	4.95518	4.87803		4.9332		6.22748	8.4913	5.55478		6.75786		36.9872		HRAS-like suppressor 2	NM_017878	HRASLS2	11q12.3	---	7948982
4.29553	3.43248	4.03131		3.91977		6.49065	3.80852	5.80659		5.36859		36.9618		EPH receptor A6	NM_001080448	EPHA6	3q11.2	membrane // integral to membrane	8081138
3.01936	2.41788	2.8414		2.75955		5.0421	3.12869	3.1665		3.77909		36.9461		---	---	---	---	---	8145685
5.20984	5.22576	5.92672		5.45411		5.68285	9.22944	7.48985		7.46738		36.913		fibroblast growth factor binding protein 1	NM_005130	FGFBP1	4p16-p15	extracellular region // extracellular space // plasma membrane	8099467
5.86429	4.75873	5.76505		5.46269		5.31947	8.02715	9.06341		7.47001		36.7461		ST8 alpha-N-acetyl-neuraminide alpha-2,8-sialyltransferase 1	NM_003034	ST8SIA1	12p12.1-p11.2	Golgi apparatus // membrane // integral to membrane // integral to Golgi membrane	7961757
4.71744	3.72758	4.72495		4.38999		4.59424	8.9826	4.41915		5.99866		36.6441		bone morphogenetic protein 5	NM_021073	BMP5	6p12.1	extracellular region // extracellular space	8127193
3.17096	3.28585	3.13083		3.19588		6.14834	2.58732	4.35684		4.36416		36.556		ankyrin repeat domain 62	ENST00000418274	ANKRD62	18p11.21	---	8074201
6.08947	5.33453	6.27392		5.89931		9.70097	5.14403	9.3164		8.0538		36.5211		ST6 (alpha-N-acetyl-neuraminyl-2,3-beta-galactosyl-1,3)-N-acetylgalactosaminide alpha-2,6-sialyltransferase 2	NM_006456	ST6GALNAC2	17q25.1	Golgi apparatus // membrane // integral to membrane // integral to Golgi membrane	8018761
6.08947	5.33453	6.27392		5.89931		9.70097	5.14403	9.3164		8.0538		36.5211		---	---	---	---	---	8180372
5.98309	5.39237	6.09554		5.82367		7.98829	7.2655	8.59248		7.94876		36.4906		---	---	---	---	---	8180280
3.71401	3.72758	4.24099		3.89419		3.95965	5.66855	6.30389		5.3107		36.3748		phospholipase A2, group VII (platelet-activating factor acetylhydrolase, plasma)	NM_005084	PLA2G7	6p21.2-p12	extracellular region // extracellular space	8126784
6.55848	6.32195	6.54507		6.47517		8.85465	8.40456	9.21433		8.82451		36.2824		major histocompatibility complex, class I-related	NM_001531	MR1	1q25.3	extracellular region // endoplasmic reticulum // plasma membrane // integral to membrane // MHC class I protein complex	7907893
3.51986	2.44779	3.20611		3.05792		5.01981	3.49459	3.98697		4.16712		36.2731		---	---	---	---	---	7900350
4.66268	4.28851	4.67062		4.5406		7.81334	4.01894	6.728		6.18676		36.2542		carcinoembryonic antigen-related cell adhesion molecule 5	NM_004363	CEACAM5	19q13.1-q13.2	plasma membrane // integral to plasma membrane // basolateral plasma membrane // anchored to membrane	8029086
6.35298	5.23735	5.55034		5.71356		9.28212	7.33728	6.73401		7.78447		36.2456		diacylglycerol kinase, epsilon 64kDa	NM_003647	DGKE	17q22	membrane // integral to membrane	8008629
7.21525	6.26742	6.78088		6.75452		9.12402	8.77481	9.70693		9.20192		36.2336		tight junction protein 3 (zona occludens 3)	NM_014428	TJP3	19p13.3	plasma membrane // tight junction // cell junction	8024687
6.0473	5.85608	6.98733		6.2969		8.40994	8.14195	9.16996		8.57395		36.1613		ribosomal protein S29	NM_001030001	RPS29	14q	intracellular // cytoplasm // cytosol // ribosome // cytosolic small ribosomal subunit	7978824
3.55894	3.72758	3.81174		3.69942		4.85746	5.12363	5.12979		5.03696		36.1554		hypothetical FLJ13744	BC070061	FLJ13744	6q14	---	8127754
6.23357	5.70021	5.94762		5.96047		8.02777	8.40315	7.91235		8.11442		36.1374		dehydrogenase/reductase (SDR family) member 3	NM_004753	DHRS3	1p36.1	membrane // integral to membrane	7912537
5.83134	5.35761	5.39962		5.52952		8.20402	4.90036	9.47668		7.52702		36.1242		SRY (sex determining region Y)-box 2	NM_003106	SOX2	3q26.3-q27	nucleus // transcription factor complex // cytoplasm	8084165
5.31202	4.78442	4.99493		5.03046		7.6036	4.31923	8.60733		6.84339		36.0391		Scm-like with four mbt domains 2	NM_001029880	SFMBT2	10p14	nucleus	7931951
8.2546	8.03065	9.07492		8.45339		12.0871	10.5931	11.8041		11.4948		35.9781		stearoyl-CoA desaturase (delta-9-desaturase)	NM_005063	SCD	10q24.31	endoplasmic reticulum // membrane // integral to membrane // nuclear membrane	7929816
5.44899	5.84547	6.11633		5.8036		8.56309	7.26074	7.83949		7.88777		35.9118		zinc finger protein 3 homolog (mouse)	NM_153018	ZFP3	17p13.2	intracellular // nucleus	8004081
4.91971	3.65398	4.49711		4.35693		4.75671	6.75306	6.24804		5.91927		35.8587		RasGEF domain family, member 1B	NM_152545	RASGEF1B	4q21.21	intracellular	8101304
4.57507	3.65352	4.29433		4.17431		6.81288	4.85042	5.33998		5.66776		35.7772		solute carrier family 1 (glial high affinity glutamate transporter), member 2	NM_004171	SLC1A2	11p13-p12	membrane fraction // integral to membrane // axon // axolemma // presynaptic membrane // dendritic spine // dendritic shaft // synapse	7947496
5.70747	5.4919	5.91604		5.70514		8.04947	6.79264	8.39234		7.74482		35.7516		EPH receptor A1	NM_005232	EPHA1	7q34	integral to plasma membrane // membrane	8143575
6.6781	5.67246	6.48725		6.27927		9.99915	9.25745	6.31068		8.52243		35.7232		solute carrier family 27 (fatty acid transporter), member 2	NM_003645	SLC27A2	15q21.2	peroxisome // peroxisomal matrix // endoplasmic reticulum // membrane // integral to membrane	7983650
4.47268	4.21965	4.77917		4.4905		6.84696	5.24272	6.1894		6.09303		35.6871		serpin peptidase inhibitor, clade A (alpha-1 antiproteinase, antitrypsin), member 5	NM_000624	SERPINA5	14q32.1	extracellular region // extracellular region // membrane // protein complex	7976488
3.93921	3.50647	4.30424		3.91664		4.19461	6.61665	5.12751		5.31292		35.6501		protein tyrosine phosphatase, non-receptor type 20A	NM_001042389	PTPN20A	10q11.22	nucleus // cytoplasm // microtubule	7933437
6.78255	6.23688	6.55259		6.524		6.21779	10.6086	9.7194		8.84859		35.6313		melanoma antigen family A, 3	NM_005362	MAGEA3	Xq28	---	8175747
4.96641	4.35302	5.1852		4.83488		6.18845	5.12363	8.35758		6.55656		35.6095		G protein-coupled receptor 158	NM_020752	GPR158	10p12.1	plasma membrane // integral to membrane	7926715
5.49998	5.12953	5.73827		5.45593		7.85132	6.56778	7.76823		7.39577		35.5548		coiled-coil domain containing 64	NM_207311	CCDC64	12q24.23	---	7959131
2.79923	2.66529	3.16811		2.87755		3.92494	2.853	4.92244		3.90013		35.5367		---	---	---	---	---	7919778
5.62217	6.14977	6.09554		5.95583		8.34399	7.2655	8.59248		8.06732		35.4526		---	---	---	---	---	8180273
5.70648	5.07272	5.72463		5.50128		7.79528	7.4249	7.13185		7.45067		35.4354		zinc finger CCCH-type containing 6	NM_198581	ZC3H6	2q13	---	8044450
5.87871	5.69941	5.9275		5.8352		7.97851	9.02017	6.70703		7.9019		35.4177		tropomodulin 1	NM_003275	TMOD1	9q22.3	nucleus // cytoplasm // membrane // myofibril // cortical cytoskeleton	8156706
5.29454	4.73663	4.55521		4.86212		6.14805	6.04304	7.5613		6.58413		35.4167		KIAA1305	NM_025081	KIAA1305	14q12	membrane // integral to membrane	7973724
5.91299	5.585	6.27392		5.92397		7.28476	8.47112	8.30837		8.02142		35.4061		similar to hCG1640299	AK131288	LOC100133315	11q13.4	nucleus	7950082
3.32526	4.22249	4.87803		4.14192		6.53808	5.80382	4.47991		5.60727		35.3785		---	---	---	---	---	8062284
4.45082	4.41514	4.60665		4.49087		6.38248	4.8153	7.03998		6.07925		35.3692		transmembrane protein 63C	NM_020431	TMEM63C	14q24.3	membrane // integral to membrane	7975932
3.74193	3.24957	4.20673		3.73275		6.5571	3.22045	5.37774		5.05176		35.3363		pregnancy specific beta-1-glycoprotein 3	NM_021016	PSG3	19q13.2	extracellular region	8037231
3.71401	3.1414	3.81174		3.55572		4.90566	4.51701	5.00108		4.80792		35.2165		zinc finger protein 818 pseudogene	ENST00000344759	ZNF818P	19q13.42	intracellular // nucleus	8030969
5.36477	4.88265	5.65454		5.30065		8.04393	4.24283	9.21346		7.16674		35.2048		olfactomedin 1	NM_014279	OLFM1	9q34.3	endoplasmic reticulum // endoplasmic reticulum lumen // membrane	8159220
4.41064	3.58014	3.4706		3.82046		7.87388	4.05845	3.56012		5.16415		35.1708		phosphatidic acid phosphatase type 2	NM_001037317	PAP2D	1p21.3	membrane // integral to membrane	7917946
7.41572	7.89356	8.12766		7.81231		10.8081	9.35517	11.5026		10.5553		35.1111		cysteine-rich protein 2	NM_001312	CRIP2	14q32.3	---	7977397
9.14334	9.38994	9.1537		9.22899		12.6668	12.818	11.9107		12.4652		35.0652		epithelial cell adhesion molecule	NM_002354	EPCAM	2p21	plasma membrane // integral to membrane // basolateral plasma membrane // apical plasma membrane	8098439
4.22792	4.22249	4.10305		4.18449		5.67046	5.08165	6.18994		5.64735		34.9593		nipsnap homolog 3B (C. elegans)	NM_018376	NIPSNAP3B	9q31.1	---	8157027
4.54772	4.08628	5.01747		4.55049		6.10707	6.18712	6.12941		6.1412		34.9569		NCK-associated protein 5	NM_207363	NCKAP5	2q21.2	cellular_component	8055323
4.12315	3.43261	3.50863		3.68813		3.82002	3.54105	7.56197		4.97435		34.8745		small nucleolar RNA, C/D box 116-5	NR_003320	SNORD116-5	15q11.2	---	7981958
4.12315	3.43261	3.50863		3.68813		3.82002	3.54105	7.56197		4.97435		34.8745		small nucleolar RNA, C/D box 116-5	NR_003320	SNORD116-5	15q11.2	---	7981962
3.75166	3.69047	3.95903		3.80038		7.31644	3.40716	4.6518		5.12513		34.8582		glutamyl aminopeptidase (aminopeptidase A)	NM_001977	ENPEP	4q25	plasma membrane // integral to plasma membrane // brush border // external side of plasma membrane // apical plasma membrane // cytoplasmic vesicle	8096875
4.29553	3.58014	4.55673		4.14413		5.16738	6.16718	5.42648		5.58701		34.8175		oxoglutarate (alpha-ketoglutarate) receptor 1	NM_080818	OXGR1	13q32.1	plasma membrane // integral to membrane	7972428
3.78912	3.10584	4.06749		3.65415		4.09614	7.11748	3.56007		4.92456		34.7663		interleukin 22 receptor, alpha 2	NM_052962	IL22RA2	6q25.1	extracellular region // extracellular space	8129848
3.63668	3.65398	3.95958		3.75008		5.45716	3.59002	6.10865		5.05195		34.7158		lysophosphatidic acid receptor 6	NM_005767	LPAR6	13q14	plasma membrane // integral to membrane	7971565
5.72063	5.74144	6.00701		5.82303		6.54564	9.33141	7.63303		7.8367		34.5811		keratin 15	NM_002275	KRT15	17q21.2	intermediate filament	8015337
6.43884	5.85608	6.03065		6.10852		7.71033	10.1578	6.78761		8.21857		34.5427		ATPase, H+ transporting, lysosomal 56/58kDa, V1 subunit B1	NM_001692	ATP6V1B1	2p13.1	membrane fraction // membrane // basolateral plasma membrane // apical plasma membrane // vacuolar proton-transporting V-type ATPase complex // proton-transporting V-type ATPase, V1 domain	8042537
4.66268	4.22249	5.2243		4.70315		6.72698	5.82942	6.42637		6.32759		34.5393		---	---	---	---	---	8171024
2.72818	2.4777	2.77172		2.6592		2.9211	2.41822	5.39254		3.57729		34.5248		---	---	---	---	---	8139792
6.46359	5.35761	4.87803		5.56641		7.4913	6.91723	8.03895		7.48249		34.4222		chromosome 1 open reading frame 210	NM_182517	C1orf210	1p34.2	membrane // integral to membrane	7915500
7.01937	6.74048	6.64308		6.80098		10.6564	7.77334	8.97805		9.13594		34.3327		chromosome 4 open reading frame 34	BC008502	C4orf34	4p14	membrane // integral to membrane	8099912
3.48099	3.1414	3.95958		3.52732		6.62835	3.76755	3.81245		4.73612		34.2694		DEAD (Asp-Glu-Ala-Asp) box polypeptide 43	NM_018665	DDX43	6q12-q13	intracellular	8120679
6.43826	5.59619	6.27817		6.10421		8.23909	7.05896	9.28352		8.19386		34.2329		immunoglobulin superfamily, member 9	NM_001135050	IGSF9	1q22-q23	plasma membrane // integral to membrane // cell junction // synapse	7921492
4.0153	4.65113	4.61456		4.42699		5.31947	4.94785	7.55464		5.94065		34.1916							8071049
6.27154	6.04442	6.56044		6.29213		10.5764	6.08456	8.64748		8.43615		34.0746		ATPase, Ca++ transporting, ubiquitous	NM_174954	ATP2A3	17p13.3	nucleus // membrane // integral to membrane // sarcoplasmic reticulum	8011516
4.0515	3.69078	4.24018		3.99415		4.50761	3.67961	7.87345		5.35356		34.0349		cancer/testis antigen family 45, member A5	NM_001007551	CT45A5	Xq26.3	---	8175344
4.29553	3.43248	3.81174		3.84658		5.64185	5.16443	4.6526		5.15296		33.9622		---	---	---	---	---	7980718
4.98905	4.0158	4.4357		4.48018		5.37171	5.81617	6.80692		5.99826		33.8844		FAT tumor suppressor homolog 2 (Drosophila)	NM_001447	FAT2	5q32-q33	cellular_component // plasma membrane // integral to membrane	8115302
4.80891	4.15242	4.13774		4.36636		4.70332	6.40667	6.42598		5.84532		33.8719		zinc finger protein 667	NM_022103	ZNF667	19q13.43	intracellular // nucleus	8039593
6.60369	5.97731	7.1229		6.56797		8.63637	8.29399	9.44503		8.7918		33.8588		myelin protein zero-like 3	NM_198275	MPZL3	11q23.3	membrane // integral to membrane	7952036
7.28312	7.19436	7.32537		7.26761		8.82311	10.2536	10.1059		9.72754		33.8478		mannosidase, alpha, class 1A, member 1	NM_005907	MAN1A1	6q22	Golgi membrane // membrane fraction // endoplasmic reticulum // ER-Golgi intermediate compartment // Golgi apparatus // membrane // integral to membrane	8129254
4.42162	3.39769	4.26937		4.02956		5.53692	3.26809	7.37467		5.39323		33.8416		tyrosinase-related protein 1	NM_000550	TYRP1	9p23	membrane // integral to membrane // melanosome membrane	8154367
5.97657	5.31494	5.40537		5.56563		6.12549	5.53846	10.6735		7.44582		33.7822		small nucleolar RNA, C/D box 116-15	NR_003330	SNORD116-15	15q11.2	---	7981978
6.47903	5.26676	6.12592		5.95724		8.15825	7.4323	8.31624		7.96893		33.7689		chromosome 1 open reading frame 172	BC033143	C1orf172	1p36.11	---	7914003
4.08695	3.32241	3.81137		3.74024		4.44809	5.22342	5.33736		5.00295		33.7601		cysteine-rich secretory protein 2	NM_003296	CRISP2	6p21-qter	extracellular region // extracellular space	8126891
5.01169	4.28851	4.77759		4.6926		6.65722	5.77776	6.39242		6.2758		33.7383		chromosome 21 open reading frame 87	AF426265	C21orf87	21q22.2	---	8070386
8.36303	7.96658	8.10161		8.14374		11.2315	9.85804	11.5781		10.8892		33.7127		junction plakoglobin	NM_002230	JUP	17q21	membrane fraction // soluble fraction // cytoplasm // cytosol // fascia adherens // internal side of plasma membrane // actin cytoskeleton // membrane // Z disc // desmosome	8015412
4.22792	3.94532	5.50404		4.55909		6.9879	2.853	8.44297		6.09462		33.6805		chromosome 14 open reading frame 83	BC104940	C14orf83	14q24.1	membrane // integral to membrane	7979721
4.21451	3.65295	4.52513		4.13086		4.47747	3.54456	8.54297		5.52167		33.6686		forkhead box R2	NM_198451	FOXR2	Xp11.21	nucleus	8167895
6.11368	5.85716	6.36041		6.11042		7.59485	8.63053	8.27048		8.16529		33.629		myoglobin	NM_203377	MB	22q13.1	---	8075659
5.05565	5.17011	5.81715		5.34763		6.10707	4.69334	10.633		7.14447		33.6006		5-hydroxytryptamine (serotonin) receptor 1A	NM_000524	HTR1A	5q11.2-q13	plasma membrane // integral to plasma membrane	8112333
5.09832	3.87342	4.87803		4.61659		5.90522	6.06314	6.52366		6.16401		33.5186		citrate lyase beta like	NM_206808	CLYBL	13q32	mitochondrion // citrate lyase complex	7969815
5.49998	4.70574	5.50404		5.23659		7.05453	6.56778	7.3399		6.9874		33.4343		ankyrin repeat domain 56	BC137241	ANKRD56	4q21.1	---	8101207
6.30738	5.9425	6.66302		6.3043		8.92902	7.2323	9.06992		8.41041		33.4075		LY6/PLAUR domain containing 3	NM_014400	LYPD3	19q13.31	plasma membrane // anchored to plasma membrane	8037301
6.86114	6.59993	6.57564		6.6789		8.7002	8.51516	9.48986		8.90174		33.2815		uroplakin 3B	NM_030570	UPK3B	7q11.2	plasma membrane // integral to membrane	8133741
5.01169	4.75873	4.61456		4.79499		7.18914	6.22618	5.75505		6.39012		33.2666		chromosome 9 open reading frame 95	NR_023352	C9orf95	9q21.13	---	8161839
3.71401	3.65398	4.03194		3.79997		5.61267	4.57803	5.00108		5.06392		33.2621		F-box protein 15	NM_152676	FBXO15	18q22.3	SCF ubiquitin ligase complex	8023843
4.48747	4.08628	4.8286		4.46745		10.8917	3.22162	3.74085		5.9514		33.217		neuronal cell adhesion molecule	NM_001037132	NRCAM	7q31.1-q31.2	plasma membrane // integral to plasma membrane // external side of plasma membrane // neuron projection	8142270
5.78706	5.57523	6.17741		5.84657		7.62721	7.17576	8.55999		7.78765		33.2004		---	---	---	---	---	8180272
4.66268	4.4127	4.75127		4.60888		7.67526	5.29866	5.4423		6.13874		33.1936		UDP glucuronosyltransferase 1 family, polypeptide A1	NM_000463	UGT1A1	2q37	endoplasmic reticulum // microsome // membrane // integral to membrane	8049349
6.92189	6.33987	6.43265		6.56481		8.70712	8.85444	8.66891		8.74349		33.1873		MANSC domain containing 1	NM_018050	MANSC1	12p13.2	membrane // integral to membrane	7961365
6.04994	6.10855	6.73311		6.2972		6.55352	6.10566	12.4931		8.3841		33.1401		G antigen 12B	NM_001127345	GAGE12B	Xp11.23	---	8167575
6.13451	5.08781	5.79134		5.67122		7.28476	7.95921	7.40093		7.5483		33.0984		eyes absent homolog 2 (Drosophila)	NM_172111	EYA2	20q13.1	nucleus // cytoplasm	8063187
4.82181	4.28851	4.30759		4.47264		5.20691	7.99923	4.6526		5.95291		33.0962		chondrolectin	NM_024944	CHODL	21q11.2	membrane // integral to membrane // perinuclear region of cytoplasm	8067969
5.56107	5.04488	5.65454		5.42017		7.04326	6.00777	8.59017		7.21374		33.0907		thrombospondin 3	NM_007112	THBS3	1q21	extracellular region // extracellular region // platelet alpha granule lumen	7920664
6.3265	6.08749	6.05271		6.15557		9.80079	7.10709	7.66538		8.19109		33.0679		odd-skipped related 2 (Drosophila)	NM_001142462	OSR2	8q22.2	intracellular // nucleus	8147573
5.13059	4.99805	5.24334		5.12399		5.89309	8.83049	5.72783		6.81714		33.0434		solute carrier family 1 (high affinity aspartate/glutamate transporter), member 6	NM_005071	SLC1A6	19p13.12	membrane fraction // integral to plasma membrane // membrane	8034907
6.38228	6.77467	6.874		6.67698		9.75893	8.39894	8.49154		8.88314		33.0412		tRNA methyltransferase 12 homolog (S. cerevisiae)	NM_017956	TRMT12	8q24.13	---	8148263
7.63847	6.62938	7.47071		7.24618		10.5303	9.43851	8.93371		9.63419		32.9553		non-SMC element 2, MMS21 homolog (S. cerevisiae)	NM_173685	NSMCE2	8q24.13	nucleus	8148293
5.5116	4.26228	4.75127		4.84172		3.99399	9.19477	6.11454		6.43443		32.8957		zinc finger protein 204 pseudogene	NR_002722	ZNF204	6p21.3	---	8124498
6.67574	6.10855	6.44916		6.41115		9.75176	8.42149	7.3821		8.51845		32.8693		cystathionine-beta-synthase	NM_000071	CBS	21q22.3	nucleus // nucleolus // cytoplasm // cytosol	8070632
4.46454	3.24957	4.34006		4.01806		4.59347	3.31305	8.10679		5.33777		32.8446		cholinergic receptor, muscarinic 3	NM_000740	CHRM3	1q43	plasma membrane // integral to plasma membrane // cell junction // synapse // postsynaptic membrane	7910915
3.32544	2.86257	3.62262		3.27021		3.71233	3.36086	5.9581		4.34376		32.8283		small nucleolar RNA, C/D box 116-1	NR_003316	SNORD116-1	15q11.2	---	7981949
4.42534	3.72758	4.17277		4.10856		6.32068	4.69334	5.35779		5.45727		32.8266		hypothetical LOC440905	BC144438	LOC440905	2q21.1	---	8055143
4.4986	3.94532	3.92285		4.12226		5.22105	5.54975	5.65409		5.47496		32.8147		hypothetical LOC728212	AK302783	LOC728212	22q11.21	---	8074330
5.51574	4.73224	5.42141		5.22313		6.88789	6.51352	7.40979		6.93707		32.8144		ubiquitin specific peptidase 2	NM_004205	USP2	11q23.3	cytoplasm // plasma membrane	7952249
5.49857	5.16956	5.76505		5.47773		8.17072	6.62003	7.03349		7.27475		32.806		proprotein convertase subtilisin/kexin type 6	NM_002570	PCSK6	15q26.3	extracellular region // extracellular space // soluble fraction // endoplasmic reticulum // Golgi lumen // cell surface // membrane // extracellular matrix	7991602
7.04717	6.74782	7.18824		6.99441		10.501	8.34589	9.01816		9.28835		32.7967		---	---	---	---	---	7945663
6.80417	6.25738	6.83138		6.63098		9.32388	8.77919	8.31274		8.80527		32.79		TSC22 domain family, member 3	NM_198057	TSC22D3	Xq22.3	---	8174361
6.22405	6.2384	6.75992		6.40745		8.56385	7.5264	9.42446		8.5049		32.7345		cingulin	NM_020770	CGN	1q21	tight junction // myosin complex // cell junction	7905406
3.17096	2.86257	3.43239		3.1553		4.09614	2.853	5.61489		4.18801		32.7293		RNA binding motif protein 11	NM_144770	RBM11	21q11	---	8067869
3.2094	2.93131	3.16811		3.10294		3.01965	6.02528	3.30797		4.11764		32.701		sulfotransferase family 1E, estrogen-preferring, member 1	NM_005420	SULT1E1	4q13.1	cytoplasm // cytosol	8100808
4.36135	3.65398	4.17277		4.0627		5.31947	4.09795	6.75497		5.3908		32.69		spermatogenesis associated 6	NM_019073	SPATA6	1p33	extracellular region	7915955
5.33107	4.95518	5.26237		5.18287		6.30251	7.28414	7.04446		6.87704		32.6877		Rap guanine nucleotide exchange factor (GEF) 5	NM_012294	RAPGEF5	7p15.3	intracellular // nucleus	8138504
5.70721	4.49061	6.52381		5.57387		8.30321	7.09071	6.79356		7.39583		32.6874		neurofibromin 1	NM_001128147	NF1	17q11.2	intracellular // nucleus // cytoplasm // axon // dendrite	8022424
5.70721	4.49061	6.52381		5.57387		8.30321	7.09071	6.79356		7.39583		32.6874		neurofibromin 1	NM_001128147	NF1	17q11.2	intracellular // nucleus // cytoplasm // axon // dendrite	8067862
3.17096	2.79544	3.2054		3.05726		3.60824	2.9441	5.61489		4.05574		32.6591		chromosome 18 open reading frame 2	NR_023925	C18orf2	---	cellular_component	8021995
4.96007	4.96831	5.40377		5.11071		6.50892	6.73344	7.08436		6.77558		32.5759		---	---	---	---	---	8131512
5.41711	4.47726	5.26237		5.05225		4.79608	9.86964	5.42609		6.69727		32.5603		neuritin 1	NM_016588	NRN1	6p25.1	plasma membrane // anchored to membrane	8123739
6.49592	6.52358	6.39886		6.47279		9.30818	8.15413	8.27615		8.57949		32.547		solute carrier family 19 (folate transporter), member 1	NM_194255	SLC19A1	21q22.3	membrane fraction // integral to plasma membrane // membrane	8070912
4.77047	4.65113	5.2243		4.88196		6.64285	5.77776	6.98875		6.46979		32.5243		solute carrier family 38, member 3	NM_006841	SLC38A3	3p21.3	plasma membrane // integral to plasma membrane	8079931
6.47985	5.52361	6.3288		6.11075		7.94796	7.2655	9.0553		8.08959		32.3829		basal cell adhesion molecule (Lutheran blood group)	NM_005581	BCAM	19q13.2	plasma membrane // integral to plasma membrane // external side of plasma membrane	8029489
4.42534	4.75873	5.26237		4.81548		5.77954	6.26422	7.07688		6.37355		32.3554		NPC-A-5	NM_001104548	LOC642587	1q32.2	---	7909422
6.37945	5.85801	6.09554		6.111		8.52329	6.90524	8.82657		8.08503		32.303		transmembrane channel-like 4	NM_001145303	TMC4	19q13.42	membrane // integral to membrane	8039144
8.01822	7.74148	8.24023		7.99998		9.91428	11.0953	10.7415		10.5837		32.2965		discoidin domain receptor tyrosine kinase 1	NM_013993	DDR1	6p21.3	extracellular region // integral to plasma membrane // membrane	8177867
6.69006	6.08749	6.85027		6.54261		9.1995	8.05996	8.70738		8.65561		32.2961		G protein-coupled receptor 160	NM_014373	GPR160	3q26.2-q27	plasma membrane // integral to membrane	8083839
4.66268	4.35302	4.77759		4.59776		4.95247	6.24533	7.04446		6.08075		32.2545		CTAGE family, member 4	NM_198495	CTAGE4	7q35	cellular_component // membrane // integral to membrane	8129560
4.82235	4.18064	5.14355		4.71551		5.08444	4.4351	9.18963		6.23639		32.2527		---	---	---	---	---	8027266
6.4128	5.24605	6.39632		6.01839		7.47921	7.8193	8.56739		7.9553		32.1832		solute carrier family 22, member 23	NM_015482	SLC22A23	6p25.2	membrane // integral to membrane	8123658
6.03562	5.75468	6.43256		6.07429		7.95445	8.25896	7.86742		8.02694		32.1463		SH3 domain containing, Ysc84-like 1 (S. cerevisiae)	NM_015677	SH3YL1	2p25.3	---	8049969
5.13628	4.50208	5.35328		4.99721		7.26107	5.25562	7.28534		6.60068		32.0872		homeobox C9	NM_006897	HOXC9	12q13.3	nucleus	7955865
4.82181	3.43248	3.35633		3.8702		6.37383	4.24813	4.70695		5.10964		32.025		---	---	---	---	---	7953592
4.29553	3.21329	3.81174		3.77352		4.537	6.9526	3.45158		4.98039		31.9828		secretoglobin, family 1D, member 2	NM_006551	SCGB1D2	11q13	extracellular region // extracellular space	7940630
6.40318	5.65225	5.92555		5.99366		7.34388	7.46137	8.9214		7.90888		31.9542		---	---	---	---	---	8180275
3.17096	3.28585	3.58487		3.34723		4.95247	3.93743	4.35684		4.41558		31.9176		ovarian cancer-related protein 1	AF314543	OCR1	1q32.1	---	7908861
5.01169	4.81011	5.26237		5.02806		6.80646	4.4536	8.63665		6.63224		31.9045		G protein-coupled receptor 77	NM_018485	GPR77	19q13.33	cellular_component // plasma membrane // integral to membrane	8029914
3.17096	3.00006	2.98414		3.05172		4.537	3.93743	3.59627		4.02357		31.8459		---	---	---	---	---	8142444
6.44715	5.53912	6.17741		6.05456		8.53437	7.47862	7.92337		7.97879		31.7814		myosin, heavy chain 14	NM_001145809	MYH14	19q13.33	myosin complex	8030582
8.1712	7.67244	7.80337		7.88233		10.1175	10.0726	10.968		10.386		31.7635		single-stranded DNA binding protein 2	NM_012446	SSBP2	5q14.1	nucleus // cytoplasm	8112940
6.98019	6.42629	6.48191		6.62946		8.37039	8.5882	9.23842		8.73234		31.7202		family with sequence similarity 149, member B1	NM_173348	FAM149B1	10q22.2	---	7928354
4.48653	3.39572	5.06403		4.31543		6.85706	4.09665	6.09812		5.68395		31.7122		spermatogenesis associated 17	NM_138796	SPATA17	1q41	cytoplasm	7909768
7.88075	7.68636	8.16271		7.90994		9.64267	10.9325	10.6768		10.4173		31.6994		discoidin domain receptor tyrosine kinase 1	NM_013993	DDR1	6p21.3	extracellular region // integral to plasma membrane // membrane	8179184
3.71401	3.21329	3.73661		3.55464		6.33861	3.40716	4.29303		4.6796		31.6478		---	---	---	---	---	8154227
6.17622	5.61204	6.51375		6.10067		6.91105	10.814	6.36513		8.03006		31.6259		keratin 4	NM_002272	KRT4	12q12-q13	keratin filament	7963534
4.68829	4.37494	3.95958		4.34094		5.09893	5.91493	6.12572		5.71319		31.612		hypothetical LOC728212	AK302783	LOC728212	22q11.21	---	8071361
4.10804	3.50647	4.22834		3.94762		5.67652	4.51701	5.39213		5.19522		31.6041		neuroligin 4, Y-linked	NM_014893	NLGN4Y	Yq11.221	membrane // integral to membrane	8176655
6.08725	5.68484	6.14015		5.97074		6.32056	7.77992	9.46611		7.85553		31.5671		transmembrane protein 139	NM_153345	TMEM139	7q34	membrane // integral to membrane	8136863
6.78255	6.32184	6.61965		6.57468		7.65027	9.42529	8.86741		8.64766		31.5297		melanoma antigen family A, 6	NM_175868	MAGEA6	Xq28	cellular_component	8170553
5.1398	5.322	5.53548		5.33243		7.6142	4.85127	8.57367		7.01305		31.517		androgen receptor	NM_000044	AR	Xq11.2-q12	nucleus // cytoplasm	8167998
5.01169	4.47726	5.40537		4.96477		6.44179	5.55038	7.5925		6.52823		31.4909		calcium channel, voltage-dependent, L type, alpha 1D subunit	NM_000720	CACNA1D	3p14.3	voltage-gated calcium channel complex // membrane // integral to membrane	8080511
7.87493	7.41314	7.88393		7.724		10.8484	8.52182	11.0575		10.1426		31.3123		KIAA0182	NM_014615	KIAA0182	16q24.1	---	7997680
6.1943	6.25898	6.28318		6.24549		11.2494	6.31014	7.02034		8.19328		31.1872		synaptotagmin-like 2	NM_206927	SYTL2	11q14	membrane fraction // cytoplasm // plasma membrane // extrinsic to plasma membrane // melanosome // exocytic vesicle	7950810
8.01805	8.14777	8.383		8.18294		10.4943	10.2351	11.4755		10.7349		31.1869		F11 receptor	NM_016946	F11R	1q21.2-q21.3	plasma membrane // cell-cell junction // tight junction // integral to membrane	7921713
6.28634	6.00214	6.76717		6.35189		8.16614	7.46137	9.36908		8.3322		31.1767		---	---	---	---	---	8180279
5.1398	5.39237	5.47189		5.33469		6.80646	6.52141	7.66538		6.99775		31.1746		acid phosphatase-like 2	NM_152282	ACPL2	3q23	extracellular region	8083075
6.4137	6.22884	7.01549		6.55268		8.66509	8.38311	8.73473		8.59431		31.1572		frizzled homolog 3 (Drosophila)	NM_017412	FZD3	8p21	integral to plasma membrane // membrane // apical part of cell	8145611
7.73285	7.61465	7.9061		7.7512		10.8993	9.54782	10.0434		10.1635		31.1221		membrane bound O-acyltransferase domain containing 1	NM_001080480	MBOAT1	6p22.3	membrane // integral to membrane	8124166
6.79772	6.61473	7.05942		6.82395		9.28986	7.94757	9.60549		8.94764		31.121		chemokine (C-X-C motif) ligand 16	NM_022059	CXCL16	17p13	extracellular region // extracellular space // plasma membrane // integral to membrane	8011713
4.15145	3.83645	4.30008		4.09599		4.97124	3.97819	7.15466		5.36803		31.0556		otoraplin	NM_020157	OTOR	20p12.1-p11.23	extracellular region	8061082
6.42152	5.53912	6.49787		6.15284		8.85272	6.95242	8.37924		8.06146		31.0202		Rap guanine nucleotide exchange factor (GEF)-like 1	NM_016339	RAPGEFL1	17q21.1	intracellular // membrane fraction	8007043
4.08769	3.72758	3.88612		3.90046		5.35514	3.85357	6.10865		5.10579		30.9021		olfactory receptor, family 10, subfamily D, member 3 pseudogene	ENST00000318666	OR10D3P	11q24.2	plasma membrane // integral to membrane	7944827
6.11383	5.85801	6.03081		6.00089		8.2758	6.9526	8.33094		7.85312		30.8659		RAB17, member RAS oncogene family	NM_022449	RAB17	2q37.3	intracellular // plasma membrane	8059955
4.36135	3.65398	3.73661		3.91731		5.31947	3.03608	7.02244		5.126		30.8549		protocadherin beta 15	NM_018935	PCDHB15	5q31	plasma membrane // integral to plasma membrane	8108753
6.43884	4.75157	5.14503		5.44515		7.69994	6.86216	6.8135		7.1252		30.8542		golgi transport 1 homolog A (S. cerevisiae)	NM_198447	GOLT1A	1q32.1	Golgi apparatus // membrane // integral to membrane	7923628
4.71744	3.94532	4.61456		4.42577		4.64994	3.85357	8.8673		5.79027		30.8306		small nuclear ribonucleoprotein polypeptide N	NM_022807	SNRPN	15q11.2	nucleus // spliceosomal complex // small nuclear ribonucleoprotein complex	7981919
6.84867	5.90692	6.43265		6.39608		8.15952	7.51462	9.42837		8.3675		30.8223		transient receptor potential cation channel, subfamily M, member 4	NM_017636	TRPM4	19q13.33	plasma membrane // integral to membrane	8030251
6.2801	6.09879	6.31637		6.23175		8.70785	7.61569	8.13106		8.15153		30.8065		feline leukemia virus subgroup C cellular receptor family, member 2	NM_017791	FLVCR2	14q24.3	plasma membrane // integral to membrane	7975799
4.77047	4.53689	5.56626		4.95787		6.10707	6.79264	6.55468		6.4848		30.798		phosphate regulating endopeptidase homolog, X-linked	NM_000444	PHEX	Xp22.2-p22.1	plasma membrane // integral to plasma membrane	8166408
6.07155	5.585	6.05271		5.90309		7.81974	7.15849	8.18491		7.72104		30.7967		plexin B1	NM_001130082	PLXNB1	3p21.31	extracellular region // intracellular // plasma membrane // integral to plasma membrane	8086908
2.79923	3.17807	2.84198		2.93976		2.82508	3.08238	5.62355		3.84367		30.7477		guanine nucleotide binding protein (G protein), gamma transducing activity polypeptide 1	NM_021955	GNGT1	7q21.3	heterotrimeric G-protein complex // plasma membrane	8134252
7.84708	7.66535	8.09477		7.86907		9.37706	10.8469	10.6257		10.2832		30.6793		discoidin domain receptor tyrosine kinase 1	NM_013993	DDR1	6p21.3	extracellular region // integral to plasma membrane // membrane	8117900
6.39668	5.75492	6.29244		6.14801		6.81929	7.96499	9.31516		8.03315		30.6625		gamma-glutamyltransferase 6	NM_001122890	GGT6	17p13.2	membrane // integral to membrane	8011671
6.54301	6.50467	6.66365		6.57045		9.20661	7.59841	8.94692		8.58398		30.6454		calcium channel, voltage-dependent, beta 3 subunit	NM_000725	CACNB3	12q13	cytosol // voltage-gated calcium channel complex // membrane	7955142
5.21936	4.28851	5.56626		5.02471		7.14904	5.9275	6.6148		6.56378		30.6301		ubiquitin specific peptidase 51	NM_201286	USP51	Xp11.21	---	8173174
5.29915	4.18468	4.74629		4.74337		7.67536	3.81056	7.10258		6.19617		30.6279		calpain 13	NM_144575	CAPN13	2p22-p21	intracellular	8051275
7.22867	6.61405	7.18722		7.00998		10.5544	8.0216	8.88569		9.15391		30.584		cadherin, EGF LAG seven-pass G-type receptor 2 (flamingo homolog, Drosophila)	NM_001408	CELSR2	1p21	cytoplasm // plasma membrane // integral to membrane	7903632
5.2733	4.8592	4.8286		4.98703		7.20765	5.6399	6.68611		6.51122		30.5631		phosphatidylinositol glycan anchor biosynthesis, class Z	NM_025163	PIGZ	3q29	endoplasmic reticulum // membrane // integral to membrane // intrinsic to endoplasmic reticulum membrane	8093166
6.45143	6.12206	6.25317		6.27555		8.04864	7.77633	8.75511		8.19336		30.5599		aarF domain containing kinase 1	NM_020421	ADCK1	14q24.3	extracellular region	7976000
5.53151	4.47726	5.76505		5.25794		7.65772	4.3877	8.54692		6.86411		30.5476		G protein-coupled receptor, family C, group 5, member C	NM_022036	GPRC5C	17q25	mitochondrion // plasma membrane // integral to plasma membrane // cytoplasmic vesicle	8009639
2.72818	2.60111	2.77172		2.70034		4.80782	3.12869	2.63672		3.52441		30.5174		---	---	---	---	---	8017148
5.46774	4.75873	5.37093		5.19913		7.52302	6.35514	6.45953		6.77923		30.3916		zinc finger protein 630	NM_001037735	ZNF630	Xp11.3-p11.1	intracellular // nucleus	8172379
7.75647	7.97082	8.43776		8.05501		8.82071	11.7067	10.9733		10.5002		30.3567		phosphoglycerate dehydrogenase	NM_006623	PHGDH	1p12	---	7904433
7.25034	7.0661	7.74404		7.35349		9.95555	8.60682	10.1874		9.58324		30.3223		epithelial splicing regulatory protein 2	NM_024939	ESRP2	16q22.1	nucleus	8002218
5.29478	5.85801	6.11648		5.75643		5.67046	9.35945	7.46765		7.49919		30.2751		testis expressed 9	NM_198524	TEX9	15q21.3	---	7983828
7.23126	6.72794	7.36091		7.1067		9.51162	7.27485	10.9858		9.25744		30.2635		transmembrane 7 superfamily member 2	NM_003273	TM7SF2	11q13	endoplasmic reticulum // endoplasmic reticulum membrane // integral to plasma membrane // membrane	7941148
3.63668	3.35896	3.95958		3.65174		7.72745	2.9441	3.59627		4.75594		30.2377		similar to hCG2018847	AK023614	LOC100128988	20q12	---	8062601
6.17487	5.99933	6.235		6.1364		7.98542	7.97645	8.01384		7.9919		30.2377		protein phosphatase 1 (formerly 2C)-like	NM_139245	PPM1L	3q25.33-q26.1	protein serine/threonine phosphatase complex // membrane // integral to membrane	8083749
5.70747	4.70574	5.98599		5.4664		7.65055	6.45719	7.24799		7.11858		30.2241		reticulon 4 receptor-like 1	NM_178568	RTN4RL1	17p13.3	plasma membrane // anchored to plasma membrane	8011214
3.11841	2.93131	2.98612		3.01195		4.74473	3.09075	3.92974		3.92174		30.206		---	---	---	---	---	7931346
6.39657	5.73537	6.0635		6.06515		7.06337	7.24962	9.37698		7.89666		30.1973		peptidyl arginine deiminase, type III	NM_016233	PADI3	1p36.13	cytoplasm	7898431
2.69716	2.76245	3.02153		2.82705		3.88994	3.58935	3.56007		3.67979		30.1637		---	---	---	---	---	7934613
5.38375	5.40934	5.31665		5.36991		7.22236	5.90279	7.84239		6.98918		30.1544		F-box protein 16	NM_172366	FBXO16	8p21.1	---	8150002
4.33899	3.94488	4.63215		4.30534		3.7498	4.28368	8.77577		5.60308		30.1428		small nucleolar RNA, C/D box 116-3	NR_003318	SNORD116-3	15q11.2	---	7981953
4.33899	3.94488	4.63215		4.30534		3.7498	4.28368	8.77577		5.60308		30.1428		small nucleolar RNA, C/D box 116-3	NR_003318	SNORD116-3	15q11.2	---	7981966
5.53697	5.37248	5.70582		5.53842		7.02121	4.917	9.68461		7.20761		30.1382		lin-28 homolog (C. elegans)	NM_024674	LIN28	1p36.11	nucleus // nucleolus // cytoplasm	7899167
3.63668	3.80079	4.77759		4.07169		5.61267	4.99384	5.28568		5.29739		30.1032		integrin alpha FG-GAP repeat containing 1	AK309475	ITFG1	16q12.1	extracellular region // membrane // integral to membrane	8001233
6.1212	5.99933	6.20632		6.10895		8.72728	7.72673	7.37911		7.94438		30.0449		peroxisomal biogenesis factor 11 alpha	NM_003847	PEX11A	15q26.1	peroxisome // peroxisomal membrane // integral to peroxisomal membrane // membrane // integral to membrane	7991323
4.9657	4.93173	4.94916		4.94887		4.02833	8.13077	7.14622		6.43511		30.0319		zinc finger protein 382	NM_032825	ZNF382	19q13.12	intracellular // nucleus	8028194
4.73882	3.94532	4.20688		4.29701		4.7304	7.12262	4.90883		5.58728		30.0273		solute carrier family 5 (sodium/glucose cotransporter), member 1	NM_000343	SLC5A1	22q13.1|22q12.3	integral to plasma membrane // brush border // membrane // apical plasma membrane	8072587
4.32304	4.21965	4.52692		4.35654		6.28837	3.93626	6.76821		5.66428		30.0179		calpain 9	NM_006615	CAPN9	1q42.11-q42.3	cellular_component // intracellular	7910466
4.82181	4.41596	4.37252		4.53676		6.90606	5.87929	4.90883		5.89806		30.0059		homeobox A4	NM_002141	HOXA4	7p15-p14	nucleus	8138728
5.69441	5.08721	5.99729		5.59297		6.28979	7.49867	8.02		7.26948		29.9754		zinc finger protein 135	NM_003436	ZNF135	19q13.4	intracellular // nucleus	8031857
8.63935	7.94018	8.31636		8.29863		10.7946	10.7628	10.7976		10.785		29.9608		claudin 7	NM_001307	CLDN7	17p13	plasma membrane // tight junction // integral to membrane // cell junction	8012126
6.44715	6.16995	6.64935		6.42215		8.60337	7.73378	8.70046		8.34587		29.9544		cornichon homolog 2 (Drosophila)	NM_182553	CNIH2	11q13.2	endoplasmic reticulum // membrane // integral to membrane	7941587
3.63668	2.66468	3.13083		3.14406		4.35621	2.853	5.04521		4.08481		29.9214		---	---	---	---	---	8074210
5.09832	5.08781	5.59639		5.26084		8.17956	4.17436	8.14978		6.83457		29.914		cell adhesion molecule 1	NM_014333	CADM1	11q23.2	plasma membrane // cell-cell junction // integral to membrane // basolateral plasma membrane	7951807
6.90914	6.41785	7.31623		6.88107		8.81156	8.79719	9.20321		8.93732		29.8826		sema domain, immunoglobulin domain (Ig), short basic domain, secreted, (semaphorin) 3F	NM_004186	SEMA3F	3p21.3	extracellular region // extracellular space // membrane	8079896
8.20092	8.10853	8.03001		8.11315		12.3421	8.23775	11.0084		10.5294		29.782		histone cluster 2, H4a	NM_003548	HIST2H4A	1q21	---	7905067
8.20092	8.10853	8.03001		8.11315		12.3421	8.23775	11.0084		10.5294		29.782		histone cluster 2, H4a	NM_003548	HIST2H4A	1q21	---	7919627
4.54772	4.08628	4.17277		4.26892		4.95247	3.93743	7.72796		5.53929		29.7584		prostaglandin E receptor 3 (subtype EP3)	NM_000957	PTGER3	1p31.2	nuclear envelope // plasma membrane // integral to plasma membrane	7916944
4.48747	4.01633	4.10305		4.20228		5.28291	4.3877	6.68659		5.4524		29.7486		small nucleolar RNA, C/D box 116-4	NR_003319	SNORD116-4	15q11.2	---	7981955
4.54772	3.58014	4.49711		4.20832		5.0421	5.45494	5.88279		5.45994		29.7415		kinesin family member 6	NM_145027	KIF6	6p21.2	microtubule	8126184
4.42534	5.08781	3.43239		4.31518		6.08599	4.85127	5.85813		5.59846		29.7389		---	---	---	---	---	8061414
6.07155	5.42631	6.13713		5.87833		6.78045	8.68952	7.40944		7.62647		29.7387		POU class 2 homeobox 3	NM_014352	POU2F3	11q23.3	nucleus // transcription factor complex	7944537
5.86429	5.04488	5.1852		5.36479		6.08599	8.2039	6.58505		6.95832		29.7034		S100 calcium binding protein A9	NM_002965	S100A9	1q21	nucleus // nucleolus // cytoplasm	7905571
4.8959	3.81827	2.91704		3.87707		4.98181	4.74601	5.35393		5.02725		29.6662		---	---	---	---	---	7964596
5.73482	5.17011	6.19735		5.70076		8.38772	4.57803	9.20703		7.39092		29.6481		cytoplasmic FMR1 interacting protein 2	NM_001037332	CYFIP2	5q33.3	cytoplasm // synaptosome // cell junction // synapse // perinuclear region of cytoplasm	8109528
2.9082	3.25018	3.69877		3.28572		5.16738	2.58732	5.02315		4.25928		29.6302		---	---	---	---	---	8116904
4.48747	3.87342	4.61456		4.32515		6.10707	4.90036	5.80751		5.60498		29.5905		Leber congenital amaurosis 5-like	NM_152505	LCA5L	21q22.2	---	8070398
5.23846	4.41514	5.10372		4.91911		5.6231	6.3811	7.10791		6.3707		29.5093		fucosyltransferase 2 (secretor status included)	NM_000511	FUT2	19q13.3	Golgi apparatus // membrane // integral to membrane // integral to Golgi membrane	8030094
6.21427	6.02086	6.39026		6.20846		8.03253	8.14059	7.93667		8.0366		29.4459		lysine (K)-specific demethylase 4C	NM_015061	KDM4C	9p24.1	cellular_component // nucleus	8154333
6.97856	6.47566	6.75205		6.73542		8.58217	8.67998	8.88865		8.71693		29.4192		asparaginase like 1	NM_001083926	ASRGL1	11q12.3	cytoplasm	7940643
5.93654	5.30374	5.11738		5.45256		7.55361	6.68212	6.9296		7.05511		29.3909		homeobox B7	NM_004502	HOXB7	17q21.3	nucleus	8016468
6.37945	6.58498	6.69184		6.55209		7.40029	8.61788	9.41364		8.47727		29.3827		glycerol kinase 5 (putative)	NM_001039547	GK5	3q23	---	8091120
4.54772	3.87342	4.17277		4.19797		5.77954	5.75123	4.75971		5.43016		29.3519		---	---	---	---	---	7901852
2.94543	2.3886	2.33031		2.55478		3.44037	2.54632	3.92353		3.30341		29.3031		---	---	---	---	---	8148156
6.94549	6.18985	6.71948		6.61827		7.94796	10.1508	7.5699		8.55623		29.282		keratin 17	NM_000422	KRT17	17q12-q21	nucleus // nucleolus // cytoplasm // cytoskeleton // intermediate filament	8015387
3.21	2.95934	4.58387		3.5844		4.38708	3.02008	6.49261		4.63326		29.2616		---	---	---	---	---	8081454
6.17255	6.2189	6.68401		6.35849		9.19374	7.0263	8.4217		8.21391		29.1803		bolA homolog 1 (E. coli)	NM_016074	BOLA1	1p36.13-q31.3	---	7905092
5.18012	4.8592	4.74961		4.92964		7.2061	4.28368	7.61428		6.36802		29.1782		PDZ domain containing ring finger 3	NM_015009	PDZRN3	3p13	---	8088848
4.56591	4.05018	3.73549		4.11719		4.8012	5.19072	5.95415		5.31536		29.1015		---	---	---	---	---	8071523
4.56591	4.05018	3.73549		4.11719		4.8012	5.19072	5.95415		5.31536		29.1015		---	---	---	---	---	8074737
5.49998	4.81011	4.77759		5.02923		7.26614	5.82942	6.37515		6.49023		29.0503		solute carrier family 4, sodium bicarbonate cotransporter, member 8	NM_001039960	SLC4A8	12q13.13	membrane // integral to membrane	7955469
6.99713	6.9204	7.1837		7.03374		9.14314	8.63983	9.44544		9.07614		29.0371		zinc finger protein 62 homolog (mouse)	NM_152283	ZFP62	5q35.3	intracellular // nucleus	8116494
4.42534	4.35302	4.8286		4.53565		9.6723	3.59002	4.29303		5.85179		29.0175		hemicentin 1	NM_031935	HMCN1	1q25.3-q31.1	extracellular region // basement membrane	7908204
6.30841	5.20959	6.23614		5.91805		7.46704	7.13815	8.29924		7.63481		29.0089		engulfment and cell motility 3	NM_024712	ELMO3	16q22.1	cytoplasm // cytoskeleton	7996468
5.9601	5.97731	5.81715		5.91819		6.95339	7.19833	8.74821		7.63331		28.9805		transmembrane protein 40	NM_018306	TMEM40	3p25.2	membrane // integral to membrane	8085393
5.19974	4.32077	4.77678		4.76576		10.0448	3.76755	4.62463		6.14566		28.9545		potassium inwardly-rectifying channel, subfamily J, member 3	NM_002239	KCNJ3	2q24.1	voltage-gated potassium channel complex // external side of plasma membrane // membrane // integral to membrane // T-tubule	8045795
5.73482	5.42631	5.01747		5.39287		6.86951	6.9526	7.03349		6.95187		28.9085		alpha-kinase 1	NM_025144	ALPK1	4q25	---	8096919
8.64837	8.56986	8.96977		8.72933		12.1913	10.5439	11.0224		11.2525		28.9048		squalene epoxidase	NM_003129	SQLE	8q24.1	endoplasmic reticulum // endoplasmic reticulum membrane // microsome // membrane // integral to membrane	8148280
5.91299	5.12953	6.09554		5.71269		6.32068	7.80647	7.96004		7.3624		28.878		solute carrier family 6 (neurotransmitter transporter, GABA), member 11	NM_014229	SLC6A11	3p25.3	integral to plasma membrane // membrane	8077817
8.1782	8.0348	8.77579		8.3296		10.7894	10.4631	10.9514		10.7346		28.8731		histone cluster 1, H2bh	NM_003524	HIST1H2BH	6p21.3	nucleosome // nucleus // chromosome	8117426
4.54679	4.2555	4.49711		4.43313		6.90601	4.9471	5.28568		5.71293		28.8689		POTE ankyrin domain family, member G	NR_027480	POTEG	14q11.2	---	7972983
4.82181	3.87342	5.01747		4.5709		5.28291	4.09795	8.28543		5.88876		28.8316		small proline-rich protein 3	NM_005416	SPRR3	1q21-q22	cytoplasm	7905548
6.11383	5.61475	6.27392		6.00083		6.71329	9.24285	7.22888		7.72834		28.7878		melanoma antigen family A, 2	NM_175742	MAGEA2	Xq28	---	8175732
6.13319	5.6462	5.69655		5.82532		7.17578	7.76703	7.56295		7.50192		28.7814		SET binding protein 1	NM_015559	SETBP1	18q21.1	nucleus	8021047
5.97381	5.76524	6.63696		6.12534		7.826	6.60208	9.23252		7.88687		28.7581		zinc finger protein 552	NM_024762	ZNF552	19q13.43	intracellular // nucleus	8039687
7.18161	6.61465	6.94528		6.91385		8.44004	9.75464	8.50751		8.90073		28.7378		KIT ligand	NM_000899	KITLG	12q22	extracellular region // extracellular space // cytoplasm // cytoskeleton // plasma membrane // integral to membrane	7965322
5.43477	5.55463	6.11648		5.70196		7.04364	8.78419	6.18994		7.33926		28.7146		zinc finger protein 713	NM_182633	ZNF713	7p11.2	intracellular // nucleus	8132917
6.47758	6.4259	6.69177		6.53175		7.48683	8.33475	9.39863		8.40674		28.7057		sphingomyelin phosphodiesterase, acid-like 3B	NM_014474	SMPDL3B	1p35.3	extracellular region // extracellular space	7899407
7.91702	7.68033	8.56123		8.05286		11.1315	9.62579	10.324		10.3604		28.6553		isocitrate dehydrogenase 2 (NADP+), mitochondrial	NM_002168	IDH2	15q26.1	mitochondrion	7991374
5.49998	5.78139	6.34663		5.876		8.02198	7.87568	6.78144		7.5597		28.6538		forkhead box D1	NM_004472	FOXD1	5q12-q13	nucleus	8112592
3.40304	3.43449	3.87882		3.57212		5.516	4.31791	3.95105		4.59499		28.6349		---	---	---	---	---	8175315
6.41798	6.81657	6.77299		6.66918		9.17018	8.04995	8.50973		8.57662		28.6009		RAS and EF-hand domain containing	NM_152573	RASEF	9q21.32	cytoplasm // perinuclear region of cytoplasm	8161945
4.87153	4.75873	5.06123		4.89716		6.40821	6.10566	6.37515		6.29634		28.5712		ELL associated factor 2	NM_018456	EAF2	3q13.33	nucleus // nucleoplasm // nuclear speck	8082003
5.13463	4.93173	5.669		5.24512		6.94151	7.61715	5.67232		6.74366		28.5702		karyopherin alpha 7 (importin alpha 8)	NM_001145715	KPNA7	7q22.1	nucleus // nuclear pore // cytoplasm	8141263
4.08769	3.80079	4.8286		4.23903		5.31947	3.76755	7.25745		5.44816		28.5238		phenylalanine hydroxylase	NM_000277	PAH	12q22-q24.2	---	7965884
7.0526	7.10611	7.49085		7.21652		9.37052	8.66129	9.78945		9.27375		28.5072		chromosome 17 open reading frame 28	NM_030630	C17orf28	17q25.1	membrane // integral to membrane	8018264
6.36202	6.08749	6.82504		6.42485		8.51936	7.65723	8.59248		8.25636		28.5066		KIAA1543	NM_001080429	KIAA1543	19p13.2	cellular_component	8025237
6.35319	5.00437	5.68209		5.67988		7.39008	7.03506	7.46729		7.29748		28.4793		RAB19, member RAS oncogene family	NM_001008749	RAB19	7q34	plasma membrane	8136580
5.36647	4.90828	5.59639		5.29038		5.69852	8.23296	6.45953		6.797		28.4785		GRAM domain containing 1B	NM_020716	GRAMD1B	11q24.1	membrane // integral to membrane	7944769
5.70747	4.95518	5.68318		5.44861		6.95339	6.26422	7.77483		6.99748		28.4268		homeobox C6	NM_004503	HOXC6	12q13.3	nucleus	7955873
7.24521	6.80455	7.16831		7.07269		9.0504	8.57496	9.62202		9.08246		28.416		cathepsin L2	NM_001333	CTSL2	9q22.2	lysosome	8162652
3.09516	3.83515	3.50863		3.47964		4.95247	2.72299	5.72577		4.46708		28.3774		---	---	---	---	---	7992893
5.8566	5.30374	5.4547		5.53835		7.5067	6.37923	7.44278		7.10957		28.3699		autism susceptibility candidate 2	NM_015570	AUTS2	7q11.22	cellular_component	8133233
3.86664	3.21329	4.03194		3.70396		4.47822	3.4991	6.28552		4.75428		28.3568		chromosome 1 open reading frame 173	BC073916	C1orf173	1p31.1	---	7917019
6.63305	5.585	6.3288		6.18228		8.50752	7.0538	8.22885		7.93005		28.2706		NOTCH-regulated ankyrin repeat protein	NM_001004354	NRARP	9q34.3	---	8165508
4.26172	3.1414	4.75127		4.05147		5.36752	4.54752	5.67509		5.19671		28.2674		carbonic anhydrase XIV	NM_012113	CA14	1q21	membrane // integral to membrane	7905131
7.93302	7.51239	7.90534		7.78358		10.3262	8.96358	10.6458		9.97854		28.1999		ras-related C3 botulinum toxin substrate 1 (rho family, small GTP binding protein Rac1)	NM_018890	RAC1	7p22	intracellular // cytosol // plasma membrane // melanosome	8131406
5.21106	4.78442	5.46859		5.15469		5.66796	4.17304	9.97608		6.60569		28.1492		neuroligin 4, X-linked	NM_020742	NLGN4X	Xp22.32-p22.31	integral to plasma membrane // cell surface // membrane	8171205
6.17501	5.61475	6.49796		6.09591		6.74053	9.4468	7.24799		7.81177		28.1479		melanoma antigen family A, 2	NM_175742	MAGEA2	Xq28	---	8170562
4.36135	3.50626	4.17277		4.01346		6.79351	3.67961	4.95564		5.14292		28.1418		solute carrier family 8 (sodium/calcium exchanger), member 1	NM_021097	SLC8A1	2p23-p22	plasma membrane // integral to plasma membrane	8051762
6.78469	6.32195	6.39886		6.50183		7.71377	8.52303	8.75156		8.32945		28.1093		hairless homolog (mouse)	NM_005144	HR	8p21.2	nucleus // nuclear body	8149652
3.32598	3.07029	3.09477		3.16368		3.46672	3.31439	5.37516		4.05209		28.0817		tetratricopeptide repeat domain 6	BC103915	TTC6	14q21.1	---	7974029
4.62897	3.86437	4.87803		4.45712		5.05781	7.48933	4.57718		5.70811		28.0671		transferrin	NM_001063	TF	3q22.1	extracellular region // basement membrane // extracellular space // early endosome // late endosome // basal plasma membrane // endocytic vesicle // perinuclear region of cytoplasm // recycling endosome	8082797
6.53431	6.27106	6.82826		6.54454		7.82137	9.01284	8.29444		8.37622		27.9879		chromosome 6 open reading frame 168	NM_032511	C6orf168	6q16.2	mitochondrial outer membrane	8128371
4.0153	3.07029	4.24099		3.77552		5.16738	4.51701	4.81091		4.83177		27.9761		FRSS1829	AY358798	UNQ1829	13q32.3	---	7969794
2.94438	2.30449	2.72526		2.65804		3.09896	3.54456	3.56034		3.40129		27.962		---	---	---	---	---	8036418
5.86429	5.35761	5.68318		5.63503		7.60682	6.89316	7.12935		7.20977		27.9457		septin 3	NM_019106	2003-09-01	22q13.2	nucleus // cytoplasm // plasma membrane // synaptosome // cell junction // septin complex // synapse	8073548
3.55894	3.21329	3.81174		3.52799		5.0421	3.03608	5.45964		4.51261		27.9087		---	---	---	---	---	8093037
5.94728	5.47426	5.91604		5.77919		7.28095	6.24533	8.64914		7.39181		27.9038		transforming growth factor, beta 3	NM_003239	TGFB3	14q24	extracellular region // extracellular region // extracellular space // nucleus // cytoplasm // plasma membrane // secretory granule // T-tubule // extracellular matrix // platelet alpha granule lumen // cell soma	7980316
4.96859	3.87195	3.99458		4.27838		7.58137	4.2468	4.58486		5.47101		27.8758		---	---	---	---	---	8146391
4.22792	3.58014	3.73661		3.84823		5.80557	4.24813	4.70695		4.92021		27.8566		---	---	---	---	---	8123060
3.40304	2.66468	3.13083		3.06618		3.5374	3.31456	4.90883		3.92026		27.8548		cancer susceptibility candidate 1	NM_018272	CASC1	12p12.1	---	7961844
6.36159	6.09617	6.54374		6.33384		8.55381	7.30674	8.42961		8.09672		27.8328		zinc finger protein 467	NM_207336	ZNF467	7q36.1	intracellular // nucleus	8143749
7.96725	7.76819	7.95641		7.89729		9.21415	11.0027	10.0688		10.0952		27.8315		desmocollin 2	NM_024422	DSC2	18q12.1	plasma membrane // integral to membrane // cell junction // desmosome	8022711
9.28356	9.01099	9.32313		9.20589		12.3252	10.9638	12.0111		11.7667		27.8172		transducer of ERBB2, 1	NM_005749	TOB1	17q21	cytoplasm	8016739
9.16176	8.82787	9.44864		9.14609		12.3057	10.8676	11.8936		11.689		27.8027		epithelial membrane protein 2	NM_001424	EMP2	16p13.2	membrane // integral to membrane	7999387
4.22792	3.80079	4.37252		4.13374		5.9291	4.74787	5.17034		5.28244		27.7882		coiled-coil domain containing 89	NM_152723	CCDC89	11q14.1	nucleus // cytoplasm	7950804
4.98905	5.37499	5.56626		5.3101		5.77738	6.52157	8.05744		6.78547		27.7842		Boc homolog (mouse)	NM_033254	BOC	3q13.2	plasma membrane // integral to membrane	8081686
3.17096	2.93079	3.13083		3.07753		3.05282	4.3877	4.35684		3.93245		27.7797		zinc finger protein 99	BC021822	ZNF99	19p12	intracellular // nucleus	8035836
3.71401	4.22249	4.77759		4.23803		7.59194	3.03608	5.61489		5.4143		27.7552		matrix metallopeptidase 16 (membrane-inserted)	AL136588	MMP16	8q21.3	extracellular region // proteinaceous extracellular matrix // plasma membrane // integral to plasma membrane // cell surface	8151684
5.74774	4.47643	5.08733		5.10383		6.08584	7.93148	5.5386		6.51864		27.7204		S100 calcium binding protein A7	NM_002963	S100A7	1q21	extracellular region // extracellular region // nucleus // cytoplasm // cytoplasm // endoplasmic reticulum // cytosol // focal adhesion	7920252
4.77047	4.08628	4.49711		4.45128		5.42395	6.10566	5.52376		5.68445		27.7037		olfactory receptor, family 7, subfamily E, member 91 pseudogene	NR_002185	OR7E91P	2p13.3	---	8042568
7.16745	6.78006	7.15597		7.03449		9.62643	8.27822	9.04031		8.98165		27.6802		---	---	---	---	---	8180267
4.42162	4.43039	3.62009		4.15737		4.32329	7.92871	3.66856		5.30686		27.6494		chemokine (C-C motif) receptor 2	NM_001123041	CCR2	3p21.31	soluble fraction // cytoplasm // plasma membrane // integral to plasma membrane	8093294
3.44202	3.18441	3.20572		3.27738		3.92494	5.02921	3.59622		4.18346		27.6463		ADP-ribosyltransferase 3	NM_001130016	ART3	4p15.1-p14|4p15.1-p14|4p15.1-p14	cytoplasm // plasma membrane // integral to plasma membrane // anchored to membrane	8095806
4.82181	5.00069	5.53548		5.11933		5.83113	5.66855	8.10332		6.53433		27.6405		vav 1 guanine nucleotide exchange factor	NM_005428	VAV1	19p13.2	intracellular	8025076
4.91971	5.08781	5.06123		5.02291		5.90522	5.48746	7.83924		6.41064		27.6279		melanoma antigen	AF172850	LOC51152	---	---	7904478
4.66178	3.46937	4.06749		4.06621		4.26086	4.09278	7.21431		5.18931		27.6203		acyl-CoA synthetase medium-chain family member 3	NM_005622	ACSM3	16p13.11	cellular_component // mitochondrion // mitochondrial matrix	7993756
4.0153	3.07029	4.03194		3.70584		4.80782	4.51701	4.8606		4.72848		27.5953		p21-activated kinase 2 pseudogene // p21-activated kinase 2 pseudogene	NR_027053 // NR_027053	LOC646214 // LOC646214	15q11.2 // 15q11.2	---	7986603
5.05565	5.00069	5.47189		5.17608		5.58288	7.94171	6.28552		6.60337		27.5748		GRAM domain containing 2	NM_001012642	GRAMD2	15q23	membrane // integral to membrane	7990138
6.66155	6.64359	6.83218		6.71244		9.24539	7.21576	9.22763		8.56292		27.568		KIAA1370	NM_019600	KIAA1370	15q21.2-q21.3	---	7988970
4.87153	4.28851	4.17277		4.44427		5.48963	4.94785	6.56995		5.66914		27.5607		SVOP-like	NM_001139456	SVOPL	7q34	membrane // integral to membrane	8143209
6.98019	6.42629	6.93524		6.78057		7.75443	8.92143	9.26446		8.64677		27.5227		transcription factor AP-2 alpha (activating enhancer binding protein 2 alpha)	NM_003220	TFAP2A	6p24	nucleus	8123864
5.62217	4.53689	5.37093		5.17666		6.64285	5.72419	7.43468		6.60057		27.5063		tetratricopeptide repeat domain 30B	NM_152517	TTC30B	2q31.2	cilium	8056995
4.89562	4.47643	4.10235		4.49147		5.71227	6.31663	5.14895		5.72595		27.4851		piggyBac transposable element derived 5	NM_024554	PGBD5	1q42.13	membrane // integral to membrane	7924977
6.72378	6.69805	6.94102		6.78762		8.94624	8.00171	9.00981		8.65259		27.4761		slingshot homolog 3 (Drosophila)	NM_017857	SSH3	11q13.2	nucleus // cytoplasm // cytoskeleton	7941843
6.83256	6.84201	7.28704		6.9872		9.81443	8.00125	8.89974		8.90514		27.4494		Y box binding protein 2	NM_015982	YBX2	17p11.2-p13.1	nucleus // cytoplasm	8012140
7.49369	6.91844	7.47472		7.29562		10.4948	8.08634	9.30827		9.29646		27.4253		---	---	---	---	---	8180325
6.56368	5.74094	6.81531		6.37331		8.91828	7.27403	8.16561		8.11931		27.3955		arylsulfatase D	NM_001669	ARSD	Xp22.3	lysosome	8171148
6.34437	4.81011	4.92593		5.36014		7.53862	6.76637	6.17005		6.82501		27.3291		hypothetical protein LOC284542	AK090467	LOC284542	1p33	---	7915949
6.3255	5.61685	6.21874		6.05369		8.14521	7.06203	7.91591		7.70772		27.3226		chromatin modifying protein 4C	NM_152284	CHMP4C	8q21.13	cytoplasm // endosome // cytosol // membrane	8147057
5.60677	4.97658	5.80147		5.46161		4.19579	4.77417	11.891		6.95364		27.3186		solute carrier family 40 (iron-regulated transporter), member 1	NM_014585	SLC40A1	2q32	cytoplasm // plasma membrane // integral to plasma membrane // synaptic vesicle	8057677
4.29553	3.87342	4.10305		4.09067		5.28291	3.67961	6.6583		5.20694		27.2883		discs, large homolog 2 (Drosophila)	NM_001364	DLG2	11q14.1	plasma membrane // postsynaptic density // cell junction // synapse // postsynaptic membrane	7950764
6.40096	6.2559	6.93147		6.52944		8.45335	8.04885	8.41991		8.30737		27.2294		kelch repeat and BTB (POZ) domain containing 7	NM_032138	KBTBD7	13q14.11	cellular_component	7971218
5.17958	4.38449	5.3705		4.97819		6.4251	5.85457	6.71987		6.33318		27.2185		zinc finger protein 235	NM_004234	ZNF235	19q13.2	intracellular // nucleus	8037444
5.86429	5.85801	5.76505		5.82912		7.83877	7.32069	7.08753		7.41566		27.2176		RAP1 GTPase activating protein	NM_001145657	RAP1GAP	1p36.1-p35	intracellular // Golgi apparatus // membrane	7913385
7.1319	6.33987	7.03762		6.83646		9.61826	7.38252	9.09013		8.69697		27.2144		required for meiotic nuclear division 1 homolog (S. cerevisiae)	NM_017909	RMND1	6q25.1	---	8130191
6.75828	6.39234	6.82504		6.65855		9.16222	7.9534	8.29465		8.47009		27.2061		family with sequence similarity 83, member H	NM_198488	FAM83H	8q24.3	---	8153488
2.79923	3.07029	3.81174		3.22709		5.55246	2.9441	3.8127		4.10309		27.1452		---	---	---	---	---	8152211
5.88699	5.00003	5.66967		5.5189		6.10692	4.79685	10.1461		7.01663		27.1383		variable charge, X-linked 3A	NM_016379	VCX3A	Xp22	nucleus // nucleolus	8171216
5.25756	5.12953	5.53548		5.30752		9.18965	5.35273	5.70061		6.74766		27.1339		protocadherin 10	NM_032961	PCDH10	4q28.3	plasma membrane // integral to membrane	8097449
6.36862	5.4429	6.2738		6.02844		7.76408	7.58005	7.64728		7.6638		27.1275		transcription factor 7-like 1 (T-cell specific, HMG-box)	NM_031283	TCF7L1	2p11.2	nucleus	8043114
5.05565	4.08628	5.06123		4.73438		5.58288	8.11303	4.35684		6.01758		27.1038		internexin neuronal intermediate filament protein, alpha	NM_032727	INA	10q24.33	neurofilament	7930208
4.42534	3.58014	3.73661		3.91403		5.38995	4.57803	4.95564		4.97454		27.095		hypothetical protein PRO3077	ENST00000451889	PRO3077	10pter-p13	---	7932552
4.77047	3.87342	4.4357		4.35986		5.69852	5.28033	5.64403		5.54096		27.0902		transmembrane protein 47	NM_031442	TMEM47	Xp11.4	plasma membrane // integral to membrane // cell junction	8172022
6.30841	5.52361	6.34663		6.05955		8.7446	6.94091	7.40944		7.69832		27.0444		adenylosuccinate synthase like 1	NM_152328	ADSSL1	14q32.33	cytoplasm	7977273
6.52678	6.14977	6.56079		6.41245		8.32836	8.06987	8.04157		8.1466		27.0435		LAG1 homolog, ceramide synthase 4	NM_024552	LASS4	19p13.2	nucleus // endoplasmic reticulum // membrane // integral to membrane	8025382
3.32526	3.21329	3.81174		3.4501		2.85673	4.80047	5.49205		4.38309		27.0424		zinc finger protein 471	NM_020813	ZNF471	19q13.43	intracellular // nucleus	8031650
3.40339	3.90509	2.77414		3.36087		4.5009	3.93626	4.37097		4.26937		27.0318		---	---	---	---	---	8121214
4.01463	3.32241	4.46462		3.93389		5.42395	4.63244	4.93084		4.99574		26.9926		chromosome 1 open reading frame 54	BC017761	C1orf54	1q21.2	extracellular region	7905147
2.94491	2.93079	3.13083		3.00218		3.7498	4.01894	3.66866		3.81247		26.9901		---	---	---	---	---	8055424
5.59258	5.95423	6.63491		6.06057		7.54636	8.24728	7.29468		7.6961		26.9864		KIAA0746 protein	NM_015187	KIAA0746	4p15.2	membrane // integral to membrane	8099721
8.29112	8.20616	8.76158		8.41962		11.7142	9.45382	10.9039		10.6906		26.9728		CXXC finger 5	NM_016463	CXXC5	5q31.2	nucleus // cytoplasm	8108447
4.68476	4.23414	4.89753		4.60548		5.80557	3.58935	8.14143		5.84545		26.9239		---	---	---	---	---	8180360
3.71401	3.07029	4.72495		3.83642		4.70409	4.90036	5.00108		4.86851		26.9024		nudix (nucleoside diphosphate linked moiety X)-type motif 11	NM_018159	NUDT11	Xp11.22	intracellular // cytoplasm	8172708
5.67959	6.16995	6.3288		6.05945		7.76773	7.70641	7.5925		7.68888		26.8908		NHS-like 1	AK299585	NHSL1	6q23.3	---	8129888
4.91971	5.20959	5.68318		5.27083		8.19441	4.51701	7.34878		6.68674		26.8631		cell growth regulator with EF-hand domain 1	NM_006569	CGREF1	2p23.3	---	8051001
6.028	5.17011	5.86744		5.68852		6.12785	4.69334	10.8258		7.21565		26.8459		variable charge, X-linked	NM_013452	VCX	Xp22	nucleus // nucleolus	8165881
5.63609	5.22271	5.73802		5.53227		8.11179	4.31791	8.61657		7.01542		26.8091		cordon-bleu homolog (mouse)	NM_015198	COBL	7p12.1	---	8139680
4.86457	5.00003	5.75166		5.20542		7.28012	5.80191	6.7073		6.59644		26.7226		zinc finger protein 681	NM_138286	ZNF681	19p12	intracellular // nucleus	8035855
6.22405	5.88081	5.67328		5.92605		11.8035	4.63244	6.09164		7.50919		26.7149		GDNF family receptor alpha 1	NM_005264	GFRA1	10q26.11	plasma membrane // extrinsic to membrane // anchored to membrane	7936494
6.75533	6.69805	6.84004		6.76448		9.93343	7.12113	8.65278		8.56911		26.6781		H19, imprinted maternally expressed transcript (non-protein coding)	NR_002196	H19	11p15.5	---	7945680
5.19372	4.62299	5.42141		5.07937		5.88693	4.73919	8.67364		6.43326		26.6545		ATP-binding cassette, sub-family C (CFTR/MRP), member 11	NM_033151	ABCC11	16q12.1	membrane // integral to membrane	8001271
4.66268	3.50647	4.30675		4.15863		6.86522	4.46599	4.4667		5.26597		26.6275		transmembrane phosphoinositide 3-phosphatase and tensin homolog 2	NM_130785	TPTE2	13q12.11	cytoplasm // endoplasmic reticulum // membrane // integral to membrane	7970404
4.29553	4.08628	4.55673		4.31284		5.31947	5.20411	5.85813		5.46057		26.6119		ankyrin repeat and sterile alpha motif domain containing 1B	NM_152788	ANKS1B	12q23.1	nucleus // cytoplasm // plasma membrane // postsynaptic density // Cajal body // cell junction // cell projection // dendritic spine // synapse // postsynaptic membrane	7965686
4.0153	4.70574	4.97239		4.56448		6.67144	4.57803	6.08759		5.77902		26.6086		radial spoke head 1 homolog (Chlamydomonas)	NM_080860	RSPH1	21q22.3	nucleus // cytoplasm // cytosol	8070603
4.22792	3.58014	4.8286		4.21222		5.35514	4.24813	6.39242		5.3319		26.5816		syntaxin binding protein 6 (amisyn)	NM_014178	STXBP6	14q12	cytoplasm // membrane // integral to membrane	7978376
5.31202	5.21863	4.90198		5.14421		9.62241	4.35086	5.56031		6.51119		26.5733		solute carrier family 7 (cationic amino acid transporter, y+ system), member 3 pseudogene	NR_002938	LOC284379	19q13.42	membrane // integral to membrane	8039086
4.48373	4.78442	4.42777		4.56531		5.56574	5.20411	6.56345		5.77777		26.5581		solute carrier family 16, member 4 (monocarboxylic acid transporter 5)	NM_004696	SLC16A4	1p13.3	membrane fraction // plasma membrane // integral to plasma membrane	7918426
4.82181	4.75873	4.87803		4.81952		8.39202	4.69334	5.20981		6.09839		26.5352		kinesin family member 5C	NM_004522	KIF5C	2q23.1	kinesin complex // microtubule	8045637
5.34877	5.22576	5.71099		5.42851		6.3559	8.49529	5.7548		6.86866		26.5295		sema domain, immunoglobulin domain (Ig), short basic domain, secreted, (semaphorin) 3E	NM_012431	SEMA3E	7q21.11	extracellular region // extracellular space // membrane	8140650
3.09475	3.28585	3.05704		3.14588		3.25692	5.72419	2.96015		3.98042		26.528		HORMA domain containing 1	NM_032132	HORMAD1	1q21.3	nucleus	7919787
6.17501	6.42629	6.64935		6.41688		8.74123	7.24663	8.36635		8.11807		26.5111		eukaryotic translation initiation factor 4E family member 3	NM_173359	EIF4E3	3p14	cytoplasm	8088803
4.42162	4.05018	4.20223		4.22468		4.32329	7.96481	3.74085		5.34298		26.4708		chemokine (C-C motif) receptor 2	NM_001123396	CCR2	3p21.31	soluble fraction // cytoplasm // plasma membrane // integral to plasma membrane	8079392
6.59066	6.61285	6.77317		6.65889		8.4012	8.17174	8.69088		8.42127		26.4666		solute carrier family 16, member 13 (monocarboxylic acid transporter 13)	NM_201566	SLC16A13	17p13.1	plasma membrane // integral to membrane	8004266
4.66178	4.38449	4.75127		4.59918		7.89704	4.17436	5.37433		5.81524		26.4409		guanine nucleotide binding protein (G protein), alpha 14	NM_004297	GNA14	9q21	heterotrimeric G-protein complex // plasma membrane	8161892
6.12257	5.8948	6.25503		6.0908		8.02194	7.20782	7.87174		7.7005		26.4284		pleckstrin and Sec7 domain containing 4	NM_012455	PSD4	2q13	intracellular // plasma membrane	8044584
5.6339	5.57365	5.51976		5.57577		6.57477	6.99279	7.57621		7.04793		26.4027		protein disulfide isomerase family A, member 6	NM_005742	PDIA6	2p25.1	endoplasmic reticulum // endoplasmic reticulum lumen // ER-Golgi intermediate compartment // melanosome	8040249
6.69006	6.12931	6.31073		6.3767		7.49929	7.62105	9.0553		8.05855		26.3749		ATP binding domain 4	NM_080650	ATPBD4	15q14	---	7987369
6.028	5.24803	6.17755		5.81786		7.50725	6.40707	8.13958		7.3513		26.3574		chromosome 19 open reading frame 46	NM_001039876	C19orf46	19q13.12	nucleus // membrane // integral to membrane	8036232
3.32526	3.50626	3.88612		3.57255		3.60824	4.31923	5.61489		4.51412		26.3558		---	---	---	---	---	8139794
7.65287	7.13957	7.81623		7.53622		9.90378	8.71721	9.94106		9.52068		26.3323		nipsnap homolog 1 (C. elegans)	NM_003634	NIPSNAP1	22q12.2	mitochondrion // mitochondrial inner membrane	8075263
4.8133	4.4951	4.69266		4.66702		6.25357	5.11828	6.31342		5.89509		26.3138		olfactory receptor, family 10, subfamily G, member 4	NM_001004462	OR10G4	11q24.1	plasma membrane // integral to membrane	7944797
6.02783	5.24605	5.69655		5.65681		9.39518	5.29866	6.74149		7.14511		26.3098		adenylate cyclase 1 (brain)	NM_021116	ADCY1	7p13-p12	membrane // integral to membrane	8132667
4.60611	4.90828	4.4357		4.65003		4.85746	7.51462	5.24823		5.87344		26.3096		---	---	---	---	---	8092883
7.84574	7.47933	8.36965		7.89824		9.47176	11.2761	9.17065		9.97282		26.2664		argininosuccinate synthetase 1	NM_000050	ASS1	9q34.1	cytoplasm	8158671
7.03622	6.4676	7.10728		6.87037		8.65612	7.88486	9.47844		8.67314		26.2398		epsin 3	NM_017957	EPN3	17q21.33	nucleus // cytoplasm // clathrin-coated vesicle // cytoplasmic vesicle // perinuclear region of cytoplasm	8008372
3.94156	3.50626	4.49711		3.98164		5.69852	3.67961	5.70061		5.02625		26.2355		defensin, beta 126	NM_030931	DEFB126	20p13	extracellular region	8060308
7.61656	7.41777	8.03001		7.68811		9.05135	9.37336	10.6897		9.7048		26.2313		selenium binding protein 1	NM_003944	SELENBP1	1q21-q22	nucleus // cytoplasm // cytosol // membrane	7919984
5.82615	5.12723	6.22579		5.72639		5.80349	9.2145	6.6654		7.2278		26.2191		lipase, endothelial	NM_006033	LIPG	18q21.1	extracellular region // extracellular space	8021169
7.11118	6.91888	6.69184		6.9073		8.81356	8.33478	9.00564		8.71799		26.2142		islet cell autoantigen 1, 69kDa	NM_004968	ICA1	7p22	Golgi membrane // cytoplasm // Golgi apparatus // cytosol // membrane // cell junction // secretory granule membrane // synaptic vesicle membrane // cytoplasmic vesicle // synapse	8138202
2.32983	2.35932	2.5055		2.39822		4.22863	2.33642	2.51546		3.02684		26.212		---	---	---	---	---	8151211
4.15861	3.80079	4.49711		4.15217		5.2454	5.87929	4.59665		5.24045		26.2099		triggering receptor expressed on myeloid cells 1	NM_018643	TREM1	6p21.1	extracellular region // plasma membrane // plasma membrane // integral to membrane	8126303
4.21572	4.04465	3.77222		4.01087		3.95066	2.99233	8.2429		5.06196		26.2062		zinc finger protein 208	NM_007153	ZNF208	19p12	intracellular // nucleus	8035819
6.13425	5.72384	6.32868		6.06226		6.74034	7.48673	8.7228		7.64996		26.1899		chromosome 20 open reading frame 54	NM_033409	C20orf54	20p13	membrane // integral to membrane	8064388
4.94306	5.02149	5.26237		5.07564		5.71227	4.89715	8.60498		6.4048		26.1871		3-hydroxy-3-methylglutaryl-Coenzyme A synthase 2 (mitochondrial)	NM_005518	HMGCS2	1p13-p12	mitochondrion // mitochondrial inner membrane // mitochondrial matrix	7919055
3.67534	3.98082	3.65925		3.77181		4.85459	5.53732	3.88371		4.75854		26.1607		syntaxin 19	NM_001001850	STX19	3q11	membrane	8089026
5.90092	4.70574	5.03935		5.21534		7.01516	7.15342	5.56996		6.57952		26.1571		hepatic leukemia factor	NM_002126	HLF	17q22	nucleus	8008588
6.27938	6.4676	6.58159		6.44286		7.11688	8.98372	8.28079		8.12713		26.1416		propionyl Coenzyme A carboxylase, alpha polypeptide	NM_000282	PCCA	13q32	mitochondrion // mitochondrial matrix	7969835
5.98439	6.05495	5.99434		6.01123		7.92444	6.70067	8.12073		7.58194		26.1297		BCDIN3 domain containing	NM_181708	BCDIN3D	12q13.12	---	7963139
5.49998	4.95518	5.59639		5.35052		6.08599	6.79264	7.36638		6.74833		26.1249		coiled-coil domain containing 113	NM_014157	CCDC113	16q21	protein complex	7996198
5.33107	4.15504	4.87803		4.78804		8.8763	3.93743	5.28568		6.03314		26.0042		RAS guanyl releasing protein 1 (calcium and DAG-regulated)	NM_005739	RASGRP1	15q14	intracellular // membrane fraction // cytoplasm // endoplasmic reticulum // Golgi apparatus // cytosol // plasma membrane	7987405
6.57363	6.67659	6.82499		6.69174		6.6356	9.13758	9.51347		8.42888		25.9596		ferric-chelate reductase 1	NM_001013660	FRRS1	1p21.2	membrane // integral to membrane	7917954
5.97059	5.08721	6.08177		5.71319		6.53028	7.13294	7.92025		7.19449		25.9277		Cas-Br-M (murine) ecotropic retroviral transforming sequence c	NM_012116	CBLC	19q13.2	nucleus	8029476
8.01511	7.6138	8.04374		7.89089		11.202	8.6646	9.94323		9.9366		25.9251		StAR-related lipid transfer (START) domain containing 10	NM_006645	STARD10	11q13	---	7950235
4.96641	4.71622	4.36905		4.68389		4.37859	8.22765	5.0875		5.89791		25.9191		Rac/Cdc42 guanine nucleotide exchange factor (GEF) 6	NM_004840	ARHGEF6	Xq26.3	intracellular	8175393
7.53336	7.08748	7.77071		7.46385		10.6247	8.24252	9.32419		9.39715		25.9022		---	---	---	---	---	8180326
4.27384	4.75873	4.87803		4.63686		5.8179	8.31413	3.37957		5.8372		25.8869		ATPase, H+ transporting, lysosomal 38kDa, V0 subunit d2	NM_152565	ATP6V0D2	---	membrane // apical plasma membrane // vacuolar proton-transporting V-type ATPase complex // proton-transporting V-type ATPase, V0 domain	8147145
4.91971	4.28851	4.8286		4.67894		4.75671	8.31679	4.59665		5.89005		25.8843		parathyroid hormone 2 receptor	NM_005048	PTH2R	2q33	plasma membrane // integral to plasma membrane	8047910
10.167	9.4788	10.051		9.89893		13.1837	12.2976	11.9021		12.4611		25.8835		mal, T-cell differentiation protein 2	NM_052886	MAL2	8q23	cytoplasm // plasma membrane // integral to membrane // perinuclear region of cytoplasm	8148040
5.38375	4.05018	5.42219		4.95204		7.0792	6.40835	5.20929		6.23228		25.8528		arachidonate 12-lipoxygenase pseudogene 2	NR_002710	ALOX12P2	17p13	---	8004201
4.84192	3.87342	5.29947		4.67161		5.7219	5.45456	6.45869		5.87839		25.8322		neurocalcin delta	NM_001040624	NCALD	8q22.2	intracellular // cytosol // clathrin coat of trans-Golgi network vesicle	8152119
6.27154	5.78139	6.07428		6.04241		7.80691	7.27485	7.72796		7.60324		25.8313		v-maf musculoaponeurotic fibrosarcoma oncogene homolog B (avian)	NM_005461	MAFB	20q11.2-q13.1	nucleus // transcription factor complex // cytoplasm	8066266
3.63586	3.32241	3.95469		3.63765		4.30308	4.17304	5.25243		4.57618		25.8004		---	---	---	---	---	8041638
5.4505	4.69842	5.12438		5.0911		5.42239	7.1763	6.6136		6.4041		25.79		zinc finger protein interacting with K protein 1 homolog (mouse)	NM_001010879	ZIK1	19q13.43	intracellular // nucleus	8031768
5.50961	4.49713	5.40497		5.13724		8.7473	5.11409	5.52341		6.4616		25.7797		synaptotagmin X	NM_198992	SYT10	12p11.1	synaptic vesicle // membrane // integral to membrane // cell junction // cytoplasmic vesicle // synapse	7962226
5.05565	4.01633	4.03194		4.36797		7.30315	4.17436	5.00108		5.49286		25.7533		hypothetical protein LOC730130	NM_001136002	tcag7.977	7q31.32	---	8142685
5.98151	5.00985	5.71371		5.56836		7.58819	6.22502	7.19178		7.00166		25.7402		zona pellucida glycoprotein 3 (sperm receptor)	NM_001110354	ZP3	7q11.23	extracellular region // proteinaceous extracellular matrix // plasma membrane // integral to membrane	8133728
7.79607	7.72111	8.13638		7.88452		10.191	8.9538	10.5943		9.91303		25.7278		ras homolog gene family, member B	NM_004040	RHOB	2p24	intracellular // membrane fraction // soluble fraction // nucleus // endosome // plasma membrane // endosome membrane	8040473
3.1336	2.76245	3.243		3.04635		3.6436	2.46005	5.38401		3.82922		25.6985		complement factor H-related 3	NM_021023	CFHR3	1q32	extracellular region // extracellular space	7908481
6.25104	5.6439	5.90359		5.93284		6.30816	9.38879	6.67459		7.45718		25.6932		keratin 17	NM_000422	KRT17	17q12-q21	nucleus // nucleolus // cytoplasm // cytoskeleton // intermediate filament	8005449
4.48747	3.72758	5.14503		4.45336		5.99844	6.37266	4.41915		5.59675		25.6747		zinc finger protein 519	NM_145287	ZNF519	18p11.21	intracellular // nucleus	8022420
4.08769	3.47044	4.61456		4.05756		4.88014	4.35347	6.06365		5.09908		25.6687		calcyphosine-like	NM_144647	CAPSL	5p13.2	cytoplasm	8111506
7.64569	7.34874	7.8353		7.60991		9.40712	8.55406	10.7245		9.5619		25.6506		degenerative spermatocyte homolog 2, lipid desaturase (Drosophila)	NM_206918	DEGS2	14q32.2	endoplasmic reticulum // membrane // integral to membrane	7981278
5.79955	5.16956	5.92672		5.63194		7.23762	6.58946	7.40242		7.0765		25.6493		metallothionein-like 5, testis-specific (tesmin)	NM_004923	MTL5	11q13.2-q13.3	soluble fraction // nucleus // cytoplasm	7949956
6.88575	6.40941	7.16372		6.81963		9.17475	8.31226	8.2192		8.56874		25.6482		solute carrier family 27 (fatty acid transporter), member 3	NM_024330	SLC27A3	1q21.3	mitochondrion // membrane // integral to membrane	7905664
7.62167	7.21811	7.73318		7.52432		10.539	7.75814	10.0577		9.45161		25.6141		---	---	---	---	---	8180350
5.50113	5.47569	5.31755		5.43146		6.22786	6.44067	7.79451		6.82102		25.5835		gap junction protein, beta 5, 31.1kDa	NM_005268	GJB5	1p35.1	plasma membrane // connexon complex // integral to membrane // cell junction	7899921
9.17805	9.07146	8.96688		9.07213		11.8978	10.732	11.5464		11.3921		25.5724		transcription factor AP-2 gamma (activating enhancer binding protein 2 gamma)	NM_003222	TFAP2C	20q13.2	nucleus	8063536
4.55867	3.7244	3.43239		3.90515		5.78262	4.478	4.44953		4.90338		25.5619		---	---	---	---	---	8070396
6.91417	6.1084	6.62761		6.55006		8.60665	7.92973	8.12931		8.2219		25.524		BARX homeobox 2	NM_003658	BARX2	11q25	nucleus // transcription factor complex	7945162
4.68829	3.94532	3.92285		4.18549		4.27009	5.88013	5.60828		5.25283		25.5011		---	---	---	---	---	8074309
5.65117	4.75873	5.71099		5.37363		6.99922	6.5829	6.64394		6.74202		25.465		sulfotransferase family, cytosolic, 1A, phenol-preferring, member 2	NM_001054	SULT1A2	16p12.1	cytoplasm	8000582
6.1943	4.97658	6.18745		5.78611		7.38633	6.94675	7.43879		7.25729		25.4261		fatty acid amide hydrolase	NM_001441	FAAH	1p35-p34	cytoplasm // cytoskeleton // integral to membrane // organelle membrane	7901229
6.72071	6.03341	6.44038		6.39817		8.68591	7.23192	8.15481		8.02421		25.4143		O-6-methylguanine-DNA methyltransferase	NM_002412	MGMT	10q26	nucleus // nucleoplasm	7931379
3.94156	3.07029	3.35633		3.45606		6.55352	2.853	3.59627		4.33427		25.4107		protein kinase D1	NM_002742	PRKD1	14q11	cytosol // plasma membrane // integral to plasma membrane	7978407
4.22792	3.87342	3.88612		3.99582		5.20691	4.01894	5.80751		5.01112		25.409		zinc finger protein 479 // zinc finger protein 479	NM_033273 // NM_033273	ZNF479 // ZNF479	7p11.2 // 7p11.2	intracellular // nucleus // intracellular // nucleus	8133023
5.85137	5.52361	5.4532		5.60939		7.93033	6.47351	6.69725		7.0337		25.3914		G protein-coupled receptor 81	NM_032554	GPR81	12q24.31	plasma membrane // integral to membrane	7967325
3.9041	3.21462	3.6229		3.58054		4.92906	3.63037	4.90883		4.48942		25.3838		---	---	---	---	---	7957041
5.65117	5.80739	5.79134		5.74997		7.77433	6.59788	7.24799		7.20673		25.3352		distal-less homeobox 1	NM_178120	DLX1	2q32	nucleus	8046373
6.5431	6.44297	6.75998		6.58201		8.16456	7.45831	9.12414		8.249		25.3264		huntingtin interacting protein 1	NM_005338	HIP1	7q11.23	membrane fraction // nucleus // cytoplasm // Golgi apparatus // cytoskeleton // membrane // clathrin coated vesicle membrane // cytoplasmic vesicle	8140319
4.36135	3.35896	4.4357		4.052		7.4913	3.03608	4.70695		5.07811		25.3234		transmembrane and tetratricopeptide repeat containing 1	NM_175861	TMTC1	12p11.22	membrane // integral to membrane	7962058
5.90092	5.98867	6.41576		6.10178		7.72738	7.92395	7.28498		7.64544		25.2985		oxysterol binding protein 2	NM_030758	OSBP2	22q12.2	membrane	8072382
5.36605	4.848	5.80147		5.33851		7.61446	4.72534	7.72394		6.68791		25.2769		Rho family GTPase 1	NM_014470	RND1	12q12-q13	intracellular // cytoplasm // cytoskeleton // plasma membrane // adherens junction	7962884
4.08769	3.43248	2.98414		3.50144		4.47822	4.3877	4.29303		4.38632		25.2719		---	---	---	---	---	8130027
5.21936	5.28549	4.77759		5.09415		4.47822	6.84377	7.82022		6.38074		25.2563		oxidized low density lipoprotein (lectin-like) receptor 1	NM_002543	OLR1	12p13.2-p12.3	extracellular region // membrane fraction // plasma membrane // integral to plasma membrane	7961142
4.69006	4.90756	4.72411		4.77391		5.46238	4.70073	7.77429		5.97913		25.246		UDP glycosyltransferase 3 family, polypeptide A2	NM_174914	UGT3A2	5p13.2	membrane // integral to membrane	8111524
4.48747	4.44661	5.08247		4.67218		7.06534	5.18427	5.30393		5.85118		25.2344		POTE ankyrin domain family, member H	NM_001136213	POTEH	22q11.1	---	8074170
4.18832	3.94532	4.37252		4.16872		3.78502	5.09529	6.7812		5.2205		25.2303		FLJ45974 protein	AK127870	FLJ45974	7p12.1	---	8139699
3.09475	2.66468	3.35633		3.03858		3.89024	3.4991	4.02457		3.80464		25.2109		---	---	---	---	---	8082795
5.73482	5.17011	6.49796		5.80096		4.80782	7.82568	9.1523		7.26193		25.185		gap junction protein, gamma 1, 45kDa	NM_005497	GJC1	17q21.31	plasma membrane // connexon complex // integral to membrane // cell junction	8016094
9.54546	9.24556	9.8954		9.56214		12.36	11.3409	12.2076		11.9695		25.1761		solute carrier family 9 (sodium/hydrogen exchanger), member 3 regulator 1	NM_004252	SLC9A3R1	17q25.1	ruffle // plasma membrane // microvillus // actin cytoskeleton // apical plasma membrane // filopodium // intracellular membrane-bounded organelle	8009685
6.60369	5.97731	6.54507		6.37535		8.42597	7.07535	8.43882		7.98005		25.1703		ArfGAP with dual PH domains 1	NM_006869	ADAP1	7p22.3	nucleus // cytoplasm // plasma membrane	8137680
6.90362	6.56127	6.95017		6.80502		9.19391	7.86627	8.4897		8.51663		25.1521		transmembrane and coiled-coil domain family 1	NM_001017395	TMCC1	3q22.1	membrane // integral to membrane	8090630
6.82342	6.53918	7.10205		6.82155		8.60337	9.13407	7.8704		8.53595		25.1321		aldehyde dehydrogenase 5 family, member A1	NM_170740	ALDH5A1	6p22.2-p22.3	soluble fraction // mitochondrion	8117207
6.29009	5.24803	6.38166		5.97326		8.30802	6.90524	7.20951		7.47426		25.1286		endogenous retroviral sequence 3 (includes zinc finger protein H-plk/HPF9)	NM_001007253	ERV3	7p12-q11|7q11.2	virion // viral capsid // viral envelope	8139840
7.11118	6.80737	7.75743		7.22533		8.83583	8.60682	9.67773		9.04013		25.1172		dihydroxyacetone kinase 2 homolog (S. cerevisiae)	NM_015533	DAK	11q12.2	---	7940451
6.99157	6.47576	6.31073		6.59269		8.4468	7.03191	9.2668		8.2485		25.116		acyl-CoA thioesterase 4	NM_152331	ACOT4	14q24.3	peroxisome	7975607
4.51759	3.65398	3.81137		3.99431		5.80555	4.45236	4.73333		4.99708		25.1048		---	---	---	---	---	7903008
2.94491	3.21329	2.98414		3.04745		3.46672	3.31456	4.6526		3.81129		25.0651		---	---	---	---	---	7924307
6.27106	6.13137	6.52117		6.30787		8.16843	7.38989	8.10832		7.88888		25.0641		malonyl-CoA decarboxylase	NM_012213	MLYCD	16q24	cytoplasm // mitochondrion // peroxisome // cytosol	7997525
6.98014	6.13954	6.77268		6.63079		7.47908	8.82552	8.57087		8.29182		25.0503		exophilin 5	NM_015065	EXPH5	11q22.3	---	7951545
5.66538	5.55463	6.09415		5.77139		8.23797	5.7645	7.64739		7.21662		25.0413		BTG family, member 2	NM_006763	BTG2	1q32	---	7908917
6.13451	5.322	5.93974		5.79875		8.11858	6.33741	7.29468		7.25022		25.0308		arylsulfatase G	NM_014960	ARSG	17q24.2	endoplasmic reticulum	8009443
5.41789	5.12033	5.7648		5.43434		6.02014	7.0263	7.33544		6.79396		25.0189		FLJ41603 protein	NM_001001669	FLJ41603	5q32	intracellular // cytoplasm	8109161
6.4137	5.83292	6.59069		6.2791		8.08178	7.45831	8.00566		7.84858		24.9953		CDC42 binding protein kinase gamma (DMPK-like)	NM_017525	CDC42BPG	11q13.1	cytoplasm // cell leading edge	7949227
4.86844	4.56419	5.08875		4.84046		5.1059	8.50507	4.53587		6.04895		24.9664		lysophosphatidic acid receptor 3	NM_012152	LPAR3	1p22.3	plasma membrane // integral to plasma membrane	7917276
2.83537	2.79602	3.31847		2.98328		4.44809	3.49859	3.23723		3.72797		24.962		---	---	---	---	---	7986627
3.79073	3.07029	3.95958		3.60687		4.64994	3.31456	5.55478		4.50642		24.9402		phospholipase C-like 1	NM_001114661	PLCL1	2q33	cytoplasm	8047248
6.72443	6.1492	6.85585		6.57649		6.96494	9.90266	7.77888		8.21549		24.9221		tripartite motif-containing 29	NM_012101	TRIM29	11q22-q23	intracellular // cytoplasm	7952290
7.5177	6.89483	7.48689		7.29981		10.4726	7.66436	9.21918		9.11872		24.9173		---	---	---	---	---	8180327
4.22792	3.65398	4.92593		4.26928		5.77954	4.17436	6.04453		5.33281		24.9113		---	---	---	---	---	8150590
4.42534	4.95518	4.87803		4.75285		6.32068	4.63676	6.84557		5.93434		24.8585		cerebral dopamine neurotrophic factor	NM_001029954	CDNF	10p13	extracellular region	7932177
4.60611	4.59485	3.95958		4.38685		4.95247	5.72419	5.75505		5.47724		24.8559		hypothetical LOC728212	AK302783	LOC728212	22q11.21	---	8071375
3.67534	3.17735	4.87727		3.90999		4.67547	4.21124	5.7548		4.88051		24.8216		zinc finger protein 663	ENST00000400371	ZNF663	20q13.12	intracellular // nucleus	8066739
6.36202	5.45948	6.75998		6.19382		8.57717	6.52141	8.09279		7.73046		24.8091		musashi homolog 1 (Drosophila)	NM_002442	MSI1	12q24.1-q24.31	nucleus // cytoplasm // polysome	7967039
3.36442	2.66468	3.09394		3.04101		4.47151	3.31456	3.59627		3.79411		24.7648		Na+/H+ exchanger domain containing 1	NM_139173	NHEDC1	4q24	membrane // integral to membrane	8177130
7.8408	7.46762	7.95641		7.75495		9.53514	9.35945	10.1215		9.67204		24.721		neurofibromin 1	NM_001042492	NF1	17q11.2	intracellular // nucleus // cytoplasm // axon // dendrite	8006239
7.24083	6.61473	7.31634		7.0573		8.82633	8.64697	8.9278		8.80036		24.6987		tetratricopeptide repeat domain 9	NM_015351	TTC9	14q24.2	---	7975412
7.19725	6.87642	7.643		7.23889		11.3715	5.08102	10.626		9.02615		24.6897		carbonic anhydrase XII	NM_001218	CA12	15q22	cytoplasm // plasma membrane // integral to membrane	7989501
5.53151	4.41596	5.56626		5.17124		7.50725	5.08165	6.75497		6.44796		24.6887		hypothetical protein LOC100131860	AK097109	LOC100131860	15q25.2	---	7991047
6.73035	6.16939	6.72501		6.54158		8.90495	8.03671	7.52455		8.1554		24.6702		WW domain containing oxidoreductase	NM_016373	WWOX	16q23.3-q24.1	nucleus // cytoplasm // mitochondrion // Golgi apparatus	7997352
6.8548	6.12872	6.34652		6.44335		8.6517	7.46612	7.96868		8.02883		24.6065		protein tyrosine phosphatase, non-receptor type 6	NM_080549	PTPN6	12p13	nucleus // cytoplasm // cytosol // membrane	7953569
7.54113	7.40089	7.73051		7.55751		9.80079	9.08445	9.36196		9.41573		24.5877		WD repeat domain 59	NM_030581	WDR59	16q23.1	cellular_component	8002802
5.40102	5.12953	5.47189		5.33415		9.85476	4.24813	5.83305		6.64531		24.5805		Down syndrome cell adhesion molecule	NM_001389	DSCAM	21q22.2	extracellular region // membrane fraction // plasma membrane // integral to plasma membrane	8070421
4.08769	3.21329	3.73661		3.6792		4.99793	3.93743	4.81091		4.58209		24.5404		---	---	---	---	---	8017829
3.89343	3.61706	3.84893		3.78647		4.64916	3.81056	5.6866		4.71544		24.5339		zinc finger protein 479 // zinc finger protein 479	NM_033273 // NM_033273	ZNF479 // ZNF479	7p11.2 // 7p11.2	intracellular // nucleus // intracellular // nucleus	8139800
5.22323	5.18985	6.07428		5.49579		8.28401	5.20411	7.03889		6.84234		24.5015		proline-rich transmembrane protein 3	NM_207351	PRRT3	3p25.3	membrane // integral to membrane	8085255
6.40498	5.62873	6.05669		6.03014		6.76629	6.8849	8.86854		7.50658		24.4844		elongation factor RNA polymerase II-like 3	NM_025165	ELL3	15q15.3	nucleus // transcription elongation factor complex	7988212
6.51182	6.49188	6.78636		6.59668		8.56579	7.80647	8.25742		8.20989		24.4549		zinc finger protein 704	NM_001033723	ZNF704	8q21.13	intracellular	8151496
6.93355	5.93058	6.81114		6.55842		9.58848	5.3523	9.53794		8.15957		24.4137		aldolase C, fructose-bisphosphate	NM_005165	ALDOC	17cen-q12	mitochondrion // cytoskeleton	8013660
4.69587	3.87342	3.99576		4.18835		4.99793	5.09897	5.53526		5.21072		24.4098		ADP-ribosylation factor-like 11	NM_138450	ARL11	13q14.2	intracellular	7969145
7.2118	7.02234	7.6578		7.29731		9.22015	8.14883	9.86167		9.07688		24.3867		chromosome 7 open reading frame 68	NM_013332	C7orf68	7q32.1	cellular_component // membrane // integral to membrane	8135915
6.028	5.17011	5.76505		5.65438		6.18845	4.69334	10.2167		7.03285		24.3787		variable charge, X-linked 3B	NM_001001888	VCX3B	Xp22.31	nucleus // nucleolus	8165890
3.71401	3.39572	3.92285		3.67753		6.19747	3.4991	4.02409		4.57355		24.365		phosphatidylinositol-4-phosphate 5-kinase, type I, beta	NM_003558	PIP5K1B	9q13	cellular_component // membrane	8155673
10.1023	9.96867	10.5502		10.207		12.7065	12.4207	12.9346		12.6873		24.2991		keratin 19	NM_002276	KRT19	17q21.2	intermediate filament // Z disc // sarcolemma // costamere	8015349
4.29464	3.58014	4.37165		4.08214		5.64185	4.20859	5.3717		5.07405		24.2986		leucine, glutamate and lysine rich 1	NM_001004316	LEKR1	3q25.31	---	8083576
7.66003	7.3129	7.62484		7.53259		9.67407	8.57313	9.83764		9.36161		24.2815		peroxisomal biogenesis factor 11 beta	NM_003846	PEX11B	1q21.1	mitochondrion // peroxisome // peroxisomal membrane // integral to peroxisomal membrane // membrane // integral to membrane	7904755
4.92697	4.65147	5.62324		5.06722		7.45989	5.73466	5.6982		6.29758		24.2807		---	---	---	---	---	8151709
6.11383	5.83292	6.29244		6.07973		8.2476	7.44181	6.97735		7.55559		24.275		anoctamin 9	NM_001012302	ANO9	11p15.5	membrane // integral to membrane // chloride channel complex	7945394
5.49998	4.90828	5.65483		5.35436		7.24727	5.82942	6.88272		6.65314		24.2564		inhibitor of DNA binding 2B, dominant negative helix-loop-helix protein (pseudogene)	NR_026582	ID2B	3p14.2	---	8088480
4.60611	4.01633	4.30759		4.31001		4.16294	4.90036	7.00007		5.35446		24.233		MAM domain containing glycosylphosphatidylinositol anchor 2	NM_001113498	MDGA2	14q21.3	plasma membrane // anchored to membrane	7978801
8.30494	7.86419	8.52113		8.23009		11.1567	9.73109	9.77315		10.2203		24.1821		gigaxonin	NM_022041	GAN	16q24.1	cytoplasm // cytoskeleton // neurofilament	7997414
4.48653	4.32077	3.95903		4.25544		6.12252	4.66778	5.06299		5.28443		24.1805		---	---	---	---	---	8161938
4.20718	4.18739	3.77028		4.05495		5.85604	4.06661	5.1837		5.03545		24.1802		relaxin 1	NM_006911	RLN1	9p24.1	extracellular region	8159981
7.1923	6.78779	7.41986		7.13332		9.13024	8.09202	9.35146		8.85791		24.1765		angel homolog 1 (Drosophila)	NM_015305	ANGEL1	14q24.3	---	7980327
3.01936	3.21329	3.81174		3.34813		4.02833	3.31456	5.12979		4.15756		24.1756		small nucleolar RNA, C/D box 116-11	NR_003326	SNORD116-11	15q11.2	---	7981970
6.5503	6.04426	6.37121		6.32192		8.37337	6.94048	8.23358		7.84914		24.1576		potassium channel tetramerisation domain containing 15	NM_024076	KCTD15	19q13.11	voltage-gated potassium channel complex // membrane	8027584
5.59134	5.22881	5.50088		5.44034		6.51407	6.67753	7.07128		6.75429		24.152		tensin 1	NM_022648	TNS1	2q35-q36	cytoplasm // cytoskeleton // focal adhesion // cell junction	8058869
5.60738	5.3559	5.95102		5.6381		5.91676	6.26373	8.81357		6.99802		24.1203		ventricular zone expressed PH domain homolog 1 (zebrafish)	NM_024621	VEPH1	3q24-q25	plasma membrane	8091678
5.59258	5.97731	5.98599		5.85196		7.76109	5.87929	8.14978		7.26339		24.1188		solute carrier family 6 (neurotransmitter transporter, creatine), member 8	NM_005629	SLC6A8	Xq28	integral to plasma membrane // membrane	7995292
4.96641	4.22249	5.1852		4.79137		7.03266	4.80047	6.00014		5.94442		24.0653		zinc finger protein 287	NM_020653	ZNF287	17p11.2	intracellular // nucleus	8013026
5.53117	4.53605	4.89753		4.98825		7.16923	5.0141	6.38171		6.18835		24.0584		nuclear receptor subfamily 5, group A, member 2	NM_205860	NR5A2	1q32.1	nucleus	7908597
5.99084	5.9654	6.11273		6.02299		5.98706	8.43887	7.98854		7.47149		24.0495		cyclin-dependent kinase inhibitor 2A (melanoma, p16, inhibits CDK4)	NM_058197	CDKN2A	9p21	nucleus // nucleus // nucleoplasm // nucleoplasm // nucleolus // cytoplasm	8160441
3.40304	3.43248	3.43239		3.42263		4.75671	3.4991	4.47991		4.24524		24.0343		chromosome 12 open reading frame 33	BC028195	C12orf33	12p13.31	---	7960942
4.32844	4.53689	4.52692		4.46408		6.10647	5.41536	5.0875		5.53644		24.0219		sphingosine-1-phosphate phosphotase 2	NM_152386	SGPP2	2q36.1	endoplasmic reticulum // membrane // integral to membrane	8048717
4.36135	3.65398	4.49711		4.17081		7.5994	3.4991	4.41915		5.17255		24.0178		---	---	---	---	---	8040428
7.85022	8.02228	8.0509		7.97447		9.69424	9.56043	10.4128		9.88916		24.0104		dishevelled associated activator of morphogenesis 1	NM_014992	DAAM1	14q23.1	cytoplasm	7974697
4.91897	4.82591	5.28092		5.0086		6.12991	6.31765	6.17835		6.20863		23.9595		chromosome 9 open reading frame 93	AY422473	C9orf93	9p22.3	---	8154416
5.21936	4.59401	4.85331		4.88889		5.68394	5.71041	6.78049		6.05828		23.9193		SLIT-ROBO Rho GTPase activating protein 3	NM_014850	SRGAP3	3p25.3	intracellular	8085164
5.80048	4.47643	5.58132		5.28608		7.46683	5.33486	6.84037		6.54735		23.8603		StAR-related lipid transfer (START) domain containing 5	NM_181900	STARD5	15q26	cytosol	7990839
5.93673	5.75492	5.84252		5.84473		7.08673	6.24533	8.38373		7.2386		23.8483		protocadherin beta 13	NM_018933	PCDHB13	5q31	plasma membrane // integral to membrane	8108737
6.27154	5.97731	6.43265		6.22717		8.34842	7.52249	7.25745		7.70945		23.8035		cyclin-dependent kinase inhibitor 2B (p15, inhibits CDK4)	NM_078487	CDKN2B	9p21	cytoplasm	8160452
6.26718	6.43463	6.91849		6.5401		8.40006	7.29789	8.59124		8.0964		23.7963		zinc finger protein 680	NM_178558	ZNF680	7q11.21	intracellular // nucleus // nucleolus	8139820
3.63668	3.21329	3.95958		3.60318		4.537	4.24813	4.59665		4.46059		23.7959		cation channel, sperm-associated, beta	NM_024764	CATSPERB	14q32.12	membrane // integral to membrane // flagellum	7980861
5.02058	4.61303	5.10313		4.91225		8.46535	3.58935	6.18764		6.08078		23.7882		tumor protein p63	NM_003722	TP63	3q28	nucleus // nucleus // cytoplasm	8084766
4.48747	3.94488	4.77432		4.40222		5.71227	5.14403	5.4917		5.44933		23.786		zinc finger protein 14 homolog (mouse)	NM_020917	ZFP14	19q13.12	intracellular // nucleus	8036304
5.88864	5.45948	5.73421		5.69411		9.18837	4.21124	7.73747		7.04569		23.7365		LON peptidase N-terminal domain and ring finger 2	NM_198461	LONRF2	2q11.2	---	8054281
5.23846	4.32077	5.14843		4.90255		5.50131	7.41216	5.28521		6.06623		23.7361		neurofilament, heavy polypeptide	NM_021076	NEFH	22q12.2	mitochondrion // neurofilament // axon	8072229
6.36191	6.25714	6.6254		6.41481		8.64721	7.30691	7.85488		7.93633		23.7188		period homolog 2 (Drosophila)	NM_022817	PER2	2q37.3	nucleus // cytoplasm	8059996
6.61845	5.585	6.15748		6.12031		6.65722	9.34399	6.71433		7.57185		23.7167		iroquois homeobox 6	NM_024335	IRX6	16q11.2-q13	nucleus	7995674
4.87153	3.87342	4.4357		4.39355		7.57691	4.24813	4.47991		5.43498		23.7036		lin-7 homolog A (C. elegans)	NM_004664	LIN7A	12q21	plasma membrane // tight junction // basolateral plasma membrane // synaptosome // cell junction // synapse // postsynaptic membrane	7965156
5.11553	4.87531	4.80149		4.93078		4.47822	8.22236	5.59633		6.09897		23.6919		glycosyltransferase 8 domain containing 2	NM_031302	GLT8D2	12q	membrane // integral to membrane	7965941
3.24784	3.00006	3.05704		3.10165		3.25692	4.80047	3.45158		3.83633		23.6867		fibrinogen-like 1	NM_201553	FGL1	8p22	extracellular region // fibrinogen complex	8149521
7.14215	6.83291	7.50289		7.15931		9.44073	8.12341	9.00002		8.85472		23.6811		Bardet-Biedl syndrome 4	NM_033028	BBS4	15q22.3-q23	pericentriolar material // cytoplasm // centriole // cytoskeleton // plasma membrane // microtubule basal body // nonmotile primary cilium // motile secondary cilium // centriolar satellite // BBSome // cilium membrane	7984686
6.58124	6.2559	6.42478		6.42064		10.524	5.85371	7.44452		7.94074		23.6751		T-box 2	NM_005994	TBX2	17q23	nucleus // transcription factor complex	8008969
6.19484	6.28543	6.3288		6.26969		7.22815	9.30347	6.728		7.75321		23.6618		deltex homolog 4 (Drosophila)	NM_015177	DTX4	11q12.1	cytoplasm	7940160
5.98309	5.39237	5.89195		5.7558		7.5994	5.95101	7.80094		7.11711		23.6512		sodium channel, nonvoltage-gated 1, beta	NM_000336	SCNN1B	16p12.2-p12.1	membrane fraction // plasma membrane // external side of plasma membrane // integral to membrane // sodium channel complex	7994074
4.87153	3.80079	5.14503		4.60578		6.61369	4.63676	5.83305		5.6945		23.638		---	---	---	---	---	8112422
7.47452	7.13443	7.85722		7.48872		10.0765	8.12471	9.5754		9.25888		23.6377		DENN/MADD domain containing 2D	NM_024901	DENND2D	1p13.3	---	7918487
6.44715	5.90692	6.67781		6.34396		6.62835	8.33478	8.56608		7.84307		23.6304		kallikrein-related peptidase 10	NM_002776	KLK10	19q13.3-q13.4	extracellular region	8038725
4.71744	4.75873	4.97239		4.81619		4.75671	6.47351	6.62945		5.95322		23.6086		---	---	---	---	---	7949717
3.63668	4.08628	4.17277		3.96524		4.16294	4.3877	6.14987		4.90017		23.5781		testis expressed 15	NM_031271	TEX15	8p12	---	8150138
4.36135	3.43248	3.66093		3.81825		4.90566	4.24813	5.00108		4.71829		23.572		---	---	---	---	---	8044741
5.9273	4.88412	6.14731		5.65291		7.3686	7.47867	6.1085		6.98526		23.5693		NIMA (never in mitosis gene a)-related kinase 3	NM_002498	NEK3	13q14.13	nucleus	7971780
4.0153	3.28585	4.37252		3.89122		7.27548	3.40716	3.74085		4.80783		23.5558		raftlin family member 2	NM_144629	RFTN2	2q33.1	plasma membrane	8058063
4.74958	4.46982	3.66093		4.29344		6.91487	4.09665	4.90246		5.30466		23.5527		dopamine receptor D1	NM_000794	DRD1	5q35.1	membrane fraction // nucleus // endoplasmic reticulum // plasma membrane // integral to plasma membrane	8115875
4.60611	3.65398	4.55673		4.27227		5.20691	3.76755	6.85806		5.27751		23.5293		lin-28 homolog (C. elegans)	NM_024674	LIN28	1p36.11	nucleus // nucleolus // cytoplasm	8065011
7.52555	7.16994	7.49491		7.3968		9.06321	8.47112	9.87653		9.13695		23.5257		receptor accessory protein 6	NM_138393	REEP6	19p13.3	membrane // integral to membrane	8024323
6.57371	6.72794	7.14345		6.81503		8.34399	7.65723	9.25031		8.41718		23.509		---	---	---	---	---	8180277
5.69441	4.92327	5.50088		5.37285		6.75717	5.29866	7.85177		6.63587		23.5073		RAS-like, family 11, member B	NM_023940	RASL11B	4q12	---	8095043
3.63586	3.35896	3.13083		3.37522		3.92428	3.72358	4.85767		4.16851		23.5035		ankyrin repeat domain 30A	NM_052997	ANKRD30A	10p11.21	nucleus	7927033
4.62897	4.21965	4.74961		4.53274		5.71227	5.45037	5.62946		5.59737		23.4875		ras homolog gene family, member H	NM_004310	RHOH	4p13	intracellular // cytoplasm // plasma membrane	8094743
6.04994	5.55463	6.29244		5.96567		7.3831	6.69854	8.01684		7.36616		23.4758		pleckstrin homology domain containing, family B (evectins) member 1	NM_021200	PLEKHB1	11q13.5-q14.1	membrane // integral to membrane	7942453
5.29478	4.59485	5.68318		5.19094		5.95258	5.16443	8.10856		6.40852		23.456		multimerin 2	NM_024756	MMRN2	10q23.2	extracellular region // basement membrane // extracellular space	7934842
7.87808	7.45122	8.17683		7.83538		9.05509	9.37908	10.5793		9.67117		23.4295		inositol-3-phosphate synthase 1	NM_016368	ISYNA1	19p13.11	cytoplasm	8035465
4.60611	4.35223	5.22379		4.72738		6.6925	5.27602	5.53526		5.83459		23.4213		POTE ankyrin domain family, member C	NM_001137671	POTEC	18p11.21	---	8022428
5.36647	5.24803	5.79134		5.46861		7.83877	6.31946	6.08759		6.74861		23.4062		transmembrane protein 117	NM_032256	TMEM117	12q12	endoplasmic reticulum // membrane // integral to membrane	7954985
5.92725	5.12723	5.47153		5.50867		7.17836	6.28469	6.93023		6.79776		23.4011		---	---	---	---	---	8180313
3.63668	3.58014	3.95958		3.72547		4.02833	5.16443	4.59665		4.59647		23.3797		complement component (3d/Epstein Barr virus) receptor 2	NM_001006658	CR2	1q32	plasma membrane // integral to membrane	7909350
7.27383	7.35746	7.24548		7.29225		10.0419	8.70938	8.2384		8.99656		23.3714		midline 2	NM_012216	MID2	Xq22.3	intracellular // cytoplasm // cytoskeleton // microtubule // microtubule associated complex	8169249
5.98309	5.28549	6.07428		5.78095		7.25673	6.55249	7.58501		7.13141		23.3605		jumonji C domain containing histone demethylase 1 homolog D (S. cerevisiae)	NM_030647	JHDM1D	7q34	---	8143341
5.03237	4.78442	5.40497		5.07392		6.1556	5.87908	6.74149		6.25872		23.3509		similar to OTTHUMP00000028720	AK301819	RP1-199H16.1	22q13.1	---	8076113
4.71744	3.58014	5.40537		4.56765		5.2454	5.61067	6.04453		5.63353		23.3354		---	---	---	---	---	8170288
7.04717	6.24795	6.71948		6.67153		9.09257	7.91207	7.67952		8.22806		23.3308		zinc finger protein 253	NM_021047	ZNF253	19p13.11	intracellular // nucleus	8027241
3.40304	3.07029	3.88612		3.45315		4.64994	3.76755	4.35684		4.25811		23.3109		similar to histone H3.3B	ENST00000414444	LOC644950	3q13.13	---	8089457
4.42534	5.00069	5.59639		5.00747		6.67144	5.12363	6.728		6.17436		23.3029		tigger transposable element derived 6	NM_030953	TIGD6	5q32	chromosome, centromeric region // nucleus	8115068
4.25998	4.22249	4.75127		4.41125		5.31947	6.31946	4.67818		5.43904		23.2993		glycosylphosphatidylinositol specific phospholipase D1	NM_001503	GPLD1	6p22.3-p22.2	extracellular region	8124211
6.10334	5.04235	5.38568		5.51046		7.43345	5.9273	7.02137		6.79404		23.2936		achaete-scute complex homolog 2 (Drosophila)	NM_005170	ASCL2	11p15.5	nucleus	7945730
4.15861	3.94532	4.67062		4.25819		5.31947	5.77776	4.6526		5.24995		23.2907		trichohyalin-like 1	NM_001008536	TCHHL1	1q21.3	---	7920135
5.91299	5.61475	6.51383		6.01386		7.44237	6.35514	8.44297		7.41349		23.2735		family with sequence similarity 104, member B	BC017571	FAM104B	Xp11.21	---	8173148
7.41155	7.03344	7.42107		7.28868		8.17956	11.1823	7.5925		8.98479		23.2704		keratin 6C	NM_173086	KRT6C	12q13.13	keratin filament	7963410
4.19327	4.15438	4.75127		4.36631		5.94084	3.97819	6.22572		5.38158		23.2525		solute carrier family 5 (sodium/glucose cotransporter), member 12	NM_178498	SLC5A12	11p14.2	plasma membrane // integral to membrane	7947165
7.53725	7.02084	8.01024		7.52278		10.4948	8.06522	9.25576		9.27192		23.2513		---	---	---	---	---	8180328
5.49998	4.53689	5.01747		5.01811		5.64185	5.75123	7.15993		6.18434		23.2403		chromosome 11 open reading frame 92	NM_207429	C11orf92	11q23.1	membrane // integral to membrane	7951593
4.98493	3.65398	4.39886		4.34592		4.85219	5.48746	5.72783		5.35583		23.238		desmocollin 1	NM_024421	DSC1	18q12.2|18q12.1	membrane fraction // plasma membrane // gap junction // integral to membrane // cell junction // desmosome	8022728
5.87657	5.06264	5.68318		5.5408		7.49063	6.63781	6.35594		6.82813		23.2336		S100 calcium binding protein P	NM_005980	S100P	4p16	nucleus // cytoplasm // cell soma	8093950
3.71401	3.00006	4.17277		3.62895		5.9291	3.12869	4.35684		4.47154		23.2187		---	---	---	---	---	7977784
3.17096	3.00006	3.13083		3.10062		3.7498	2.50188	5.20981		3.8205		23.2173		---	---	---	---	---	7932017
4.22792	3.1414	3.58487		3.6514		3.82024	3.76755	5.90704		4.49828		23.1933		---	---	---	---	---	7926383
4.48747	3.94532	4.87803		4.43694		5.35514	5.55038	5.49205		5.46586		23.1899		---	---	---	---	---	8136179
6.97993	6.98047	7.42068		7.12702		8.02408	9.32193	8.99009		8.7787		23.1749		solute carrier family 39 (metal ion transporter), member 11	NM_001159770	SLC39A11	17q24.3-q25.1	membrane // integral to membrane	8018082
2.8715	2.93079	3.28061		3.02764		3.60824	3.22162	4.35684		3.7289		23.1621		---	---	---	---	---	8107109
6.74432	6.77467	7.05399		6.85766		9.06181	7.09122	9.18332		8.44545		23.1535		cadherin, EGF LAG seven-pass G-type receptor 1 (flamingo homolog, Drosophila)	NM_014246	CELSR1	22q13.3	plasma membrane // integral to plasma membrane	8076757
5.69299	5.42631	5.85455		5.65795		7.28849	6.20201	7.41318		6.96789		23.1521		pleckstrin homology domain containing, family G (with RhoGef domain) member 6	NM_018173	PLEKHG6	12p13.31	intracellular // cytoplasm	7953303
8.69437	8.26679	8.84669		8.60262		11.283	9.82633	10.6733		10.5942		23.1513		BMP and activin membrane-bound inhibitor homolog (Xenopus laevis)	NM_012342	BAMBI	10p12.3-p11.2	cytoplasm // membrane // integral to membrane	7926875
6.43052	5.28549	6.63491		6.11697		7.49929	6.86868	8.22885		7.53227		23.1373		leucine rich transmembrane and 0-methyltransferase domain containing	NM_001145309	LRTOMT	11q13.4	cellular_component // cytoplasm // membrane // integral to membrane	7942315
5.1398	4.15504	4.4357		4.57684		5.48963	6.45719	4.95564		5.63415		23.1012		homeobox A1	NM_005522	HOXA1	7p15.3	nucleus	8138708
6.95715	6.37506	7.20341		6.84521		7.82611	8.34369	9.10854		8.42611		23.095		spectrin, beta, non-erythrocytic 2	NM_006946	SPTBN2	11q13	cytoplasm // cytoskeleton // cell cortex // spectrin	7949679
7.25034	7.09805	7.66094		7.33644		8.90066	8.80369	9.38803		9.03079		23.095		calmin (calponin-like, transmembrane)	NM_024734	CLMN	14q32.13	cytoplasm // membrane // integral to membrane	7981142
6.09223	5.3559	5.92555		5.79122		7.06005	7.53029	6.79303		7.12779		23.0792		fatty acid 2-hydroxylase	NM_024306	FA2H	16q23	endoplasmic reticulum // microsome // membrane // integral to membrane	8002792
4.91897	4.47643	5.58069		4.99203		6.27336	5.82584	6.331		6.1434		23.0642		regulator of G protein signaling 9 binding protein	NM_207391	RGS9BP	19q13.11	membrane // integral to membrane	8027480
4.01263	3.65386	3.99226		3.88625		4.9752	4.61949	4.75274		4.78247		23.0615		olfactory receptor, family 4, subfamily C, member 13	NM_001001955	OR4C13	11p11.12	plasma membrane // integral to membrane	7948046
7.8097	7.92481	8.57477		8.10309		9.34181	8.75043	11.8221		9.97145		23.0573		chromosome 3 open reading frame 58	NM_173552	C3orf58	3q24	extracellular region	8083223
4.91971	4.65113	4.61456		4.72846		6.16854	5.24272	6.04453		5.8186		23.0546		chromosome 4 open reading frame 36	NM_144645	C4orf36	4q21.3	---	8101616
4.29553	4.47726	5.26237		4.67839		6.28412	5.20411	5.78152		5.75658		23.0464		---	---	---	---	---	8011112
3.82869	4.08628	4.8031		4.23935		6.98246	2.80926	5.85728		5.21633		23.0455		non-protein coding RNA 52	NR_026869	NCRNA00052	15q25.3	membrane // integral to membrane	7985752
2.8715	2.79544	2.77172		2.81289		4.29308	3.12869	2.96015		3.46064		23.028		---	---	---	---	---	7950117
6.2337	6.08749	6.09554		6.13891		5.83113	7.96499	8.86111		7.55241		23.0253		ST6 beta-galactosamide alpha-2,6-sialyltranferase 1	NM_173216	ST6GAL1	3q27-q28	extracellular region // Golgi apparatus // membrane // integral to membrane // integral to Golgi membrane	8084717
4.9657	3.97985	4.49621		4.48059		5.90341	3.93626	6.69355		5.51107		22.9989		synaptotagmin XIII	NM_020826	SYT13	11p12-p11	integral to plasma membrane // membrane // transport vesicle	7947590
4.42534	4.35302	5.01747		4.59861		5.48963	6.38997	5.0881		5.6559		22.9915		single-minded homolog 1 (Drosophila)	NM_005068	SIM1	6q16.3-q21	nucleus // Golgi apparatus	8128459
4.02125	4.94725	3.43439		4.1343		5.05994	4.50584	5.68606		5.08395		22.9701		---	---	---	---	---	7950062
3.51964	2.96543	3.73661		3.40722		3.39654	3.12869	6.04304		4.18942		22.957		---	---	---	---	---	8180222
7.80899	7.22883	7.89713		7.64498		9.73966	9.13151	9.32869		9.39995		22.9558		neurofibromin 2 (merlin)	NM_016418	NF2	22q12.2	ruffle // nucleus // nucleolus // cytoplasm // early endosome // cytoskeleton // plasma membrane // adherens junction // extrinsic to membrane // lamellipodium // filopodium // cleavage furrow // perinuclear region of cytoplasm	8072242
6.69006	6.00003	6.64935		6.44648		7.51515	6.56778	9.69524		7.92606		22.9517		sulfite oxidase	NM_000456	SUOX	12q13.2	mitochondrion // mitochondrial intermembrane space // cytosol	7956097
7.93809	7.48785	8.2521		7.89268		11.7722	6.28239	11.0496		9.70142		22.9167		eukaryotic translation elongation factor 1 alpha 2	NM_001958	EEF1A2	20q13.3	nucleus // cytoplasm // eukaryotic translation elongation factor 1 complex	8067652
6.20196	6.08185	6.91127		6.39836		8.34774	7.02587	8.2188		7.86414		22.9086		zinc finger protein 273	NR_003099	ZNF273	7q11.21	intracellular // nucleus	8133062
4.8805	3.70801	5.19843		4.59565		6.20333	4.2468	6.49115		5.64709		22.8792		hypothetical LOC440173	NR_027471	LOC440173	9q21	---	8162183
6.55848	6.91888	6.60558		6.69431		8.32612	7.74054	8.61105		8.2259		22.879		zinc finger, DHHC-type containing 23	NM_173570	ZDHHC23	3q13.31	membrane // integral to membrane	8081779
7.61658	6.97729	7.36966		7.32118		8.9627	8.31226	9.71254		8.99583		22.8741		dehydrogenase/reductase (SDR family) member 7	NM_016029	DHRS7	14q23.1	---	7979473
6.95076	6.58428	6.90303		6.81269		8.5744	7.86571	8.67288		8.37099		22.8736		ephrin-A1	NM_004428	EFNA1	1q21-q22	plasma membrane // integral to plasma membrane // anchored to membrane	7905929
4.51759	3.97985	3.88428		4.12724		5.78784	3.63333	5.79264		5.07127		22.8732		---	---	---	---	---	7967698
7.66003	7.22883	7.86035		7.58307		9.09521	9.67218	9.18489		9.31743		22.8715		retinoblastoma-like 2 (p130)	NM_005611	RBL2	16q12.2	nucleus	7995631
9.26504	9.13699	9.55915		9.32039		11.3564	10.8749	12.1209		11.4507		22.8567		farnesyl-diphosphate farnesyltransferase 1	NM_004462	FDFT1	8p23.1-p22	endoplasmic reticulum // endoplasmic reticulum membrane // membrane // integral to membrane	8144669
6.84867	6.37506	6.49796		6.5739		8.99132	7.37385	7.86422		8.07647		22.8566		COBL-like 1	NM_014900	COBLL1	2q24.3	---	8056343
5.57684	4.9054	5.56626		5.3495		7.92546	4.99313	6.79619		6.57159		22.845		hypothetical protein FLJ20464	CR456348	FLJ20464	22q12.2	---	8072486
5.15996	5.18985	5.22379		5.1912		6.99564	4.48287	7.65272		6.37707		22.844		hypothetical FLJ44790	AK126744	FLJ44790	20q13.33	---	8063869
3.59688	3.28613	3.77418		3.5524		5.31902	3.67879	4.09126		4.36302		22.8192		chemokine (C-C motif) ligand 4	NM_002984	CCL4	17q12	extracellular region // extracellular space	8006602
6.70396	6.00003	7.22286		6.64228		7.86376	7.91207	8.69351		8.15644		22.7958		phosphatidylinositol-specific phospholipase C, X domain containing 1	NM_018390	PLCXD1	Xp22.33; Yp11.32	---	8176286
6.8232	6.76119	7.32068		6.96835		8.37678	7.66324	9.62935		8.55646		22.7902		mannosidase, beta A, lysosomal	NM_005908	MANBA	4q22-q25	lysosome	8102006
3.94156	3.433	3.50863		3.62773		4.56562	3.08238	5.71435		4.45412		22.7798		coiled-coil domain containing 110	NM_152775	CCDC110	4q35.1	nucleus	8104014
3.48099	3.35916	4.06749		3.63588		4.47523	3.40683	5.50866		4.46357		22.7645		prostate androgen-regulated transcript 1	NR_024617	PART1	5q12.1	cellular_component	8105495
7.23126	7.00002	7.93888		7.39005		8.77785	8.16422	10.2715		9.07118		22.7485		deleted in a mouse model of primary ciliary dyskinesia	NM_015448	RP11-529I10.4	10q24.32	---	7929976
6.60935	6.50354	6.22651		6.44646		7.12324	8.34806	8.26675		7.91268		22.7446		chromosome 1 open reading frame 115	NM_024709	C1orf115	1q41	membrane // integral to membrane	7909862
3.28787	2.63657	3.20668		3.04371		3.53748	2.7929	4.87179		3.73406		22.6812		---	---	---	---	---	8091998
6.96871	6.71426	7.13321		6.93873		8.81035	7.62836	9.09805		8.51225		22.6774		pirin (iron-binding nuclear protein)	NM_003662	PIR	Xp22.2	nucleus	8171435
6.61815	6.16939	6.57556		6.45437		8.35229	7.23681	8.15796		7.91569		22.6408		SH3 and multiple ankyrin repeat domains 2	NM_012309	SHANK2	11q13.3-q13.4	cytoplasm // plasma membrane // postsynaptic density // cell junction // synapse // postsynaptic membrane	7950042
7.03045	6.4352	7.84997		7.10521		9.13093	7.80572	9.20237		8.71301		22.6285		ribosomal protein L41	NM_001035267	RPL41	12q13	cytosol // ribosome // cytosolic large ribosomal subunit	7956159
3.40304	2.79544	3.43239		3.21029		3.89024	4.24813	3.66866		3.93567		22.5956		---	---	---	---	---	7908775
6.07155	4.81011	4.8286		5.23675		8.89461	4.17436	6.18994		6.41964		22.5881		potassium inwardly-rectifying channel, subfamily J, member 8	NM_004982	KCNJ8	12p11.23	mitochondrion // microsome // voltage-gated potassium channel complex // ATP-sensitive potassium channel complex // membrane // integral to membrane // myofibril // sarcolemma	7961702
3.75237	2.89668	3.28061		3.30989		4.50307	3.31305	4.35609		4.05741		22.5844		---	---	---	---	---	8101990
5.56237	4.85995	5.65483		5.35905		8.53889	4.85127	6.30389		6.56468		22.4972		glutathione S-transferase theta 1	NM_000853	GSTT1	22q11.23	cytoplasm	8074980
6.39668	6.39234	7.14345		6.64416		8.68275	7.07535	8.65823		8.13878		22.4953		protein phosphatase 1H (PP2C domain containing)	NM_020700	PPM1H	12q14.1-q14.2	---	7964646
6.18219	5.70048	6.2895		6.05739		8.1548	6.69143	7.41338		7.41987		22.4928		LIM homeobox 2	NM_004789	LHX2	9q33-q34.1	nucleus	8157751
9.00478	8.5766	8.57068		8.71735		10.0076	10.5481	11.477		10.6776		22.4864		nuclear factor I/B	NM_005596	NFIB	9p24.1	intracellular // nucleus // nucleolus	8160138
1.98696	2.58758	2.50816		2.3609		3.22252	2.72016	2.73208		2.89159		22.4783		---	---	---	---	---	8066382
5.80095	4.78442	5.91584		5.5004		6.56019	5.21301	8.43608		6.73643		22.4715		non-protein coding RNA 173	NR_027345	NCRNA00173	12q24.22	---	7959016
4.0153	3.65398	4.49711		4.05546		6.65722	3.59002	4.6526		4.96662		22.4674		guanylate cyclase 1, soluble, beta 2	NR_003923	GUCY1B2	13q14.2-q14.3	---	7971671
3.71401	3.65398	3.88612		3.75137		4.41795	4.31923	5.04521		4.59413		22.4655		FKSG83	NM_032030	FKSG83	6p22.1	---	8117567
7.35098	7.01124	7.36966		7.24396		9.55829	8.28014	8.77151		8.86998		22.4466		family with sequence similarity 174, member B	NM_207446	FAM174B	15q26.1	membrane // integral to membrane	7991453
5.81389	5.4919	6.17755		5.82778		8.08178	5.82942	7.48386		7.13169		22.374		ovo-like 1(Drosophila)	NM_004561	OVOL1	11q13	intracellular // nucleus	7941401
4.6052	4.18876	4.69779		4.49725		5.80349	4.24813	6.4572		5.50294		22.3623		potassium large conductance calcium-activated channel, subfamily M, alpha member 1	NM_001014797	KCNMA1	10q22.3	caveola // voltage-gated potassium channel complex // external side of plasma membrane // integral to membrane // apical plasma membrane // terminal button // postsynaptic membrane	7934570
5.46774	5.12953	5.26237		5.28655		8.01084	5.77776	5.61489		6.46783		22.3451		C-type lectin domain family 2, member D	NM_001004419	CLEC2D	12p13	membrane fraction // plasma membrane // integral to plasma membrane	7953878
6.49512	5.73993	6.22393		6.15299		8.07629	6.43116	8.07542		7.52762		22.3408		killer cell lectin-like receptor subfamily G, member 2	NM_198508	KLRG2	7q34	membrane // integral to membrane	8143296
4.36135	3.80079	5.06123		4.40779		5.48963	4.51701	6.17005		5.39223		22.3342		---	---	---	---	---	7967967
8.48484	8.29463	8.58264		8.45403		11.1325	9.18454	10.7082		10.3417		22.329		tetraspanin 15	NM_012339	TSPAN15	10q22.1	membrane fraction // integral to plasma membrane // membrane	7928046
3.79073	3.21363	3.47051		3.49162		4.41722	3.97819	4.41837		4.27126		22.3289		chromosome 3 open reading frame 44	NM_152394	C3orf44	3q25.1	---	8091469
3.86664	3.21329	3.73661		3.60552		4.70409	3.76755	4.75971		4.41045		22.3251		---	---	---	---	---	8064029
4.42441	5.08721	5.10134		4.87098		3.22252	6.06169	8.58866		5.95762		22.3084		zinc finger protein 300	NM_052860	ZNF300	5q33.1	intracellular // nucleus	8115196
6.60424	6.52222	6.57136		6.56594		9.02767	6.64181	8.42159		8.03036		22.3033		chromosome 12 open reading frame 66	NM_152440	C12orf66	12q14.2	---	7964677
5.25756	4.47726	5.53548		5.0901		5.85626	5.03841	7.7814		6.22536		22.3032		zinc finger protein 716	NM_001159279	ZNF716	7p11.2	intracellular // nucleus	8133018
7.97873	8.12929	8.47728		8.1951		10.541	9.84056	9.68651		10.0227		22.3011		KIAA0196	NM_014846	KIAA0196	8q24.13	---	8152782
3.55894	4.08628	4.37252		4.00591		4.64994	4.31923	5.72809		4.89908		22.2964		ankyrin repeat domain 36B-like 1 (pseudogene)	NR_026844	ANKRD36BL1	1q24.2	---	7922121
6.58878	6.00003	7.1229		6.57057		7.85755	7.67146	8.57745		8.03549		22.2952		phosphatidylinositol-specific phospholipase C, X domain containing 1	NM_018390	PLCXD1	Xp22.33; Yp11.32	---	8165711
6.028	5.4919	5.89195		5.80395		6.71329	7.09659	7.48386		7.09792		22.2946		ovo-like 2 (Drosophila)	NM_021220	OVOL2	20pter-q11.23	intracellular // nucleus	8065185
3.40304	3.65398	2.91223		3.32308		4.80782	3.4991	3.88405		4.06366		22.2857		---	---	---	---	---	7966594
5.49962	4.01633	4.32989		4.61528		4.70409	5.61037	6.61412		5.64286		22.2648		dachshund homolog 1 (Drosophila)	NM_080759	DACH1	13q22	nucleus // transcription factor complex // cytoplasm	7971950
7.35979	6.65823	7.07019		7.0294		8.69673	9.89309	7.18989		8.59324		22.247		egl nine homolog 3 (C. elegans)	NM_022073	EGLN3	14q13.1	nucleus // cytoplasm	7978544
4.42534	3.28585	3.73661		3.81594		5.16738	4.17436	4.6526		4.66478		22.2448		family with sequence similarity 154, member A	AK292245	FAM154A	9p22.1	---	8160278
4.67252	3.8005	4.99493		4.48932		7.1811	4.60074	4.67977		5.4872		22.228		cystatin A (stefin A)	NM_005213	CSTA	3q21	cornified envelope // intracellular // nucleus // cytoplasm	8082058
4.60611	3.94532	4.37252		4.30799		4.41795	6.67049	4.70695		5.26513		22.2178		bridging integrator 2	NM_016293	BIN2	12q13	cytoplasm	7963289
6.34865	6.47238	7.32968		6.7169		8.50071	7.39022	8.73459		8.20851		22.2067		ephrin-A4	NM_005227	EFNA4	1q21-q22	extracellular region // plasma membrane // integral to plasma membrane // anchored to membrane	7905909
6.64723	5.97731	6.73973		6.45476		7.82251	7.2608	8.57996		7.88776		22.2007		connector enhancer of kinase suppressor of Ras 1	NM_006314	CNKSR1	1p36.11	cytoplasm // plasma membrane // cell-cell junction // cell cortex	7899101
3.51986	3.39572	4.46108		3.79222		5.97277	3.76755	4.16124		4.63386		22.1938		amelotin	NM_212557	AMTN	4q13.3	extracellular region // proteinaceous extracellular matrix // basal lamina // cell-cell junction	8095508
7.42839	6.68652	7.22286		7.11259		8.96847	8.2039	8.89786		8.69008		22.1788		SRY (sex determining region Y)-box 4	NM_003107	SOX4	6p22.3	nucleus // cytoplasm	8117165
8.12026	7.68651	8.1415		7.98276		10.298	8.9567	10.0014		9.75203		22.1637		PQ loop repeat containing 3	NM_152391	PQLC3	2p25.1	membrane // integral to membrane	8040278
6.7471	6.36833	7.07196		6.72913		8.43599	8.16482	8.05536		8.21872		22.1365		phosphodiesterase 7A	NM_002603	PDE7A	8q13	cell fraction	8151074
7.06262	7.1947	7.59204		7.28312		9.32773	8.34056	9.01605		8.89478		22.1287		retinoic acid receptor, gamma	NM_000966	RARG	12q13	nucleus // transcription factor complex // integral to membrane	7963631
5.65117	5.67246	5.96305		5.76223		5.75303	7.21784	8.13958		7.03682		22.1198		ATP-binding cassette, sub-family C (CFTR/MRP), member 2	NM_000392	ABCC2	10q24	membrane fraction // integral to plasma membrane // membrane // apical plasma membrane // intercellular canaliculus	7929779
3.40304	3.35896	3.28061		3.34754		4.59424	3.12869	4.53909		4.08734		22.0999		glycerol kinase 2	NM_033214	GK2	4q13	cytoplasm // mitochondrion // mitochondrial outer membrane // membrane	8101256
8.0835	7.53139	8.52113		8.04534		9.9628	9.78605	9.72111		9.82332		22.0994		branched chain keto acid dehydrogenase E1, alpha polypeptide	NM_000709	BCKDHA	19q13.1-q13.2	mitochondrion // mitochondrial matrix // mitochondrial alpha-ketoglutarate dehydrogenase complex	8029065
4.22792	4.35302	5.06123		4.54739		5.12677	5.24272	6.28552		5.55167		22.0848		---	---	---	---	---	7993798
8.66215	8.64925	8.79217		8.70119		11.1768	10.6563	10.0348		10.6226		22.0821		nuclear receptor interacting protein 1	NM_003489	NRIP1	21q11.2	histone deacetylase complex // nucleus	8069553
4.05008	3.65398	4.92593		4.21		4.92906	3.49859	6.98871		5.13879		22.0615		cytochrome P450, family 2, subfamily B, polypeptide 7 pseudogene 1	NR_001278	CYP2B7P1	19q13.2	---	8028955
3.44248	3.28827	3.69877		3.47651		6.26353	3.08286	3.37957		4.24199		22.0186		endomucin	NM_016242	EMCN	4q24	extracellular region // plasma membrane // integral to membrane	8101957
4.91971	3.72758	4.10305		4.25011		4.85746	4.09795	6.6		5.18514		22		necdin homolog (mouse)	NM_002487	NDN	15q11.2-q12	nucleus // cytoplasm // centrosome // perikaryon	7986757
5.92369	5.08721	5.95635		5.65575		8.16689	5.86693	6.6654		6.89974		21.9953		ring finger protein 157	NM_052916	RNF157	17q25.1	---	8018652
6.60369	6.22884	6.82504		6.55253		8.03304	7.75397	8.18985		7.99229		21.9727		coiled-coil domain containing 120	NM_033626	CCDC120	Xp11.23	---	8167430
5.09288	4.52939	4.91434		4.84553		5.7107	5.51064	6.50711		5.90948		21.9573		purinergic receptor P2X, ligand-gated ion channel, 7	NM_002562	P2RX7	12q24	cytoplasm // plasma membrane // integral to plasma membrane // bleb	7959251
4.84364	5.17643	6.32273		5.4476		7.23399	5.88528	6.811		6.64342		21.9514		chromosome 6 open reading frame 99	ENST00000367073	C6orf99	6q25.3	---	8123101
5.67959	5.4919	6.21688		5.79612		7.45064	6.45719	7.29468		7.0675		21.935		tetratricopeptide repeat domain 39B	NM_152574	TTC39B	9p22.3	---	8160213
5.80095	5.22576	5.89195		5.63955		7.81311	5.59576	7.2191		6.87599		21.9243		yippee-like 2 (Drosophila)	NM_001005404	YPEL2	17q22	nucleus // nucleolus	8008819
2.94543	2.76595	3.28161		2.99766		3.81677	3.40683	3.74068		3.65476		21.9203		---	---	---	---	---	8132413
5.29478	5.55463	5.37093		5.40678		6.95339	5.72419	7.0981		6.59189		21.919		---	---	---	---	---	8148692
5.81389	5.72796	5.86744		5.8031		5.64185	8.56934	7.0113		7.07416		21.9032		melanoma antigen family A, 12	NM_005367	MAGEA12	Xq28	cellular_component	8175724
5.18012	4.44661	4.06617		4.5643		4.59347	7.03741	5.05932		5.5634		21.8893		melanoma antigen family B, 2	NM_002364	MAGEB2	Xp21.3	---	8166611
3.86664	3.21329	3.95958		3.67984		4.16294	4.69334	4.59665		4.48431		21.8617		---	---	---	---	---	8034326
5.99227	5.14982	5.48668		5.54292		7.56512	5.29773	7.40091		6.75458		21.8596		RhoA/RAC/CDC42 exchange factor	NM_182947	GEFT	12q13.3	intracellular // cytoplasm // sarcomere	7956551
7.63818	7.37463	7.94475		7.65252		9.58363	9.08326	9.30721		9.3247		21.8514		protein phosphatase 1, regulatory (inhibitor) subunit 13B	NM_015316	PPP1R13B	14q32.33	nucleus // cytoplasm	7981460
3.71401	3.65398	3.73661		3.70153		4.47822	4.69334	4.35684		4.50947		21.827		---	---	---	---	---	8093110
8.00126	8.00493	8.42533		8.14384		9.50065	10.219	10.0327		9.91743		21.7783		RNA binding motif protein 47	NM_001098634	RBM47	4p13-p12	nucleus	8099967
4.22792	4.22249	3.81174		4.08738		5.38995	4.4536	5.0881		4.97722		21.7703		---	---	---	---	---	7939240
5.46627	5.42593	5.48725		5.45981		6.6356	6.13233	7.17477		6.64757		21.7545		ligand of numb-protein X 1	NM_001126328	LNX1	4q12	cytoplasm	8100362
5.76166	5.55463	5.93974		5.75201		6.69948	6.91723	7.39237		7.00303		21.7492		inositol 1,4,5-trisphosphate 3-kinase B	NM_002221	ITPKB	1q42.13	---	7924760
5.8266	5.33981	5.87969		5.68203		5.11589	8.67633	6.95997		6.9174		21.7416		zinc finger protein 323	NM_001135215	ZNF323	6p21.31|6p22.3-p22.1	intracellular // nucleus // cytoplasm	8124562
5.59258	6.06612	6.3288		5.99583		7.55406	6.91723	7.42632		7.2992		21.7379		castor zinc finger 1	NM_001079843	CASZ1	1p36.22	intracellular // nucleus	7912347
5.05565	4.15504	4.64259		4.61776		5.69825	5.842	5.32218		5.62081		21.7216		ATP-binding cassette, sub-family A (ABC1), member 4	NM_000350	ABCA4	1p22.1-p21	membrane fraction // integral to plasma membrane // membrane	7917798
4.91675	3.87305	4.72158		4.5038		5.80464	4.6074	6.03352		5.48185		21.7163		chromosome 3 open reading frame 25	BC066975	C3orf25	3q21.3	---	8090567
3.63668	4.35302	4.30759		4.0991		4.22863	5.03841	5.70061		4.98922		21.7149		ST8 alpha-N-acetyl-neuraminide alpha-2,8-sialyltransferase 1	NM_003034	ST8SIA1	12p12.1-p11.2	Golgi apparatus // membrane // integral to membrane // integral to Golgi membrane	7961755
4.15861	4.28851	4.37252		4.27321		5.64185	3.93743	6.0225		5.2006		21.7022		NIMA (never in mitosis gene a)-related kinase 5	NM_199289	NEK5	13q14.3	---	7971757
5.09832	3.83711	5.84164		4.92569		6.40669	4.89715	6.67914		5.99433		21.6952		ornithine decarboxylase antizyme 3	NM_016178	OAZ3	1q21.3	nucleus // cytoplasm	7905474
5.56237	5.24803	5.33564		5.38201		8.71057	4.74787	6.18994		6.54946		21.6916		ret proto-oncogene	NM_020975	RET	10q11.2	membrane // integral to membrane	7927120
6.29009	5.55463	5.73827		5.861		7.31225	5.9036	8.17994		7.13193		21.6845		hypothetical protein DKFZp686O24166	NR_026750	DKFZp686O24166	11p15.1	---	7938702
6.8361	6.00003	7.19359		6.67657		7.79397	8.12341	8.45535		8.12424		21.6828		Cbp/p300-interacting transactivator, with Glu/Asp-rich carboxy-terminal domain, 4	NM_133467	CITED4	1p34.2|1p35-p34	nucleus // cytoplasm	7915347
4.96641	4.59485	4.49711		4.68612		5.75303	4.69334	6.6583		5.70156		21.669		---	---	---	---	---	8180201
4.66268	4.53689	5.01747		4.73901		5.61267	5.77776	5.90704		5.76582		21.6672		uroplakin 1A	NM_007000	UPK1A	19q13.13	endoplasmic reticulum // plasma membrane // plasma membrane // integral to membrane	8027938
7.91441	7.23842	8.15169		7.76817		9.94827	8.82293	9.58121		9.4508		21.6606		ras homolog gene family, member D	NM_014578	RHOD	11q14.3	intracellular // plasma membrane	7941761
6.88575	7.41786	7.45435		7.25265		9.09521	9.28277	8.09279		8.82359		21.6602		sorting nexin 10	NM_013322	SNX10	7p15.2	---	8131957
5.59258	5.45948	5.43902		5.49702		6.14834	7.64287	6.2669		6.68604		21.6301		cytochrome P450, family 4, subfamily B, polypeptide 1	NM_001099772	CYP4B1	1p34-p12	endoplasmic reticulum // microsome // membrane	7901256
6.57371	5.83292	6.03081		6.14582		7.693	7.2561	7.47578		7.47496		21.6268		zinc finger protein 682	NM_033196	ZNF682	19p12	intracellular // nucleus	8035782
6.028	5.70048	6.63491		6.12113		7.4088	7.4167	7.50784		7.44445		21.6189		MCF.2 cell line derived transforming sequence-like	NM_001112732	MCF2L	13q34	intracellular // cytoplasm // mitochondrion // plasma membrane	7970194
6.71072	6.64272	6.88214		6.74519		8.32277	7.63794	8.64913		8.20328		21.6168		discs, large homolog 3 (Drosophila)	NM_021120	DLG3	Xq13.1	cellular_component	8168179
5.75773	5.12953	5.35328		5.41351		7.38597	5.27842	7.08142		6.58194		21.5834		calsyntenin 2	NM_022131	CLSTN2	3q23-q24	Golgi membrane // endoplasmic reticulum // endoplasmic reticulum membrane // Golgi apparatus // plasma membrane // integral to membrane // postsynaptic membrane	8083034
6.92189	6.49188	6.7466		6.72012		7.97114	6.81843	9.72111		8.17023		21.5785		glycosyltransferase-like 1B	NM_152312	GYLTL1B	11p11.2	Golgi apparatus // membrane // integral to membrane	7939620
3.63647	4.05018	3.93404		3.87357		7.02245	3.54456	3.56021		4.70908		21.5695		phosphoglucomutase 5	NM_021965	PGM5	9q13	stress fiber // spot adherens junction // focal adhesion // internal side of plasma membrane // intercalated disc // dystrophin-associated glycoprotein complex // cell junction // sarcolemma // costamere	8155665
3.59781	3.90856	3.6229		3.70975		4.68493	4.24813	4.59665		4.5099		21.5687		keratin associated protein 21-2	NM_181617	KRTAP21-2	21q22.1	intermediate filament	8069855
5.36647	3.87342	5.01747		4.75245		5.72603	4.24813	7.35761		5.77725		21.5636		distal-less homeobox 5	NM_005221	DLX5	7q22	nucleus // nucleolus // cytoplasm	8141140
5.53151	4.22249	5.56626		5.10675		6.52247	5.77776	6.32204		6.20743		21.5533		testes-specific protease 50	NM_013270	TSP50	3p14-p12	---	8086660
6.52754	5.83292	6.43265		6.26437		7.2185	8.48326	7.13961		7.61379		21.5412		tetra-peptide repeat homeobox-like	NR_002223	TPRXL	3p25.1	---	8077989
7.15376	6.44077	6.98092		6.85848		8.41355	7.9591	8.63362		8.33542		21.5345		ras homolog gene family, member V	NM_133639	RHOV	15q13.3	intracellular // endosome // plasma membrane	7987574
2.79923	2.30201	2.91223		2.67116		3.12006	3.59002	3.02803		3.24604		21.5217		---	---	---	---	---	8134676
4.90124	4.28177	5.86725		5.01675		6.07339	5.52186	6.69355		6.09627		21.5182		GRB2-related adaptor protein	NM_006613	GRAP	17p11.2	cytoplasm	8013319
7.77646	7.3129	8.11052		7.73329		9.17225	8.96539	10.0539		9.39719		21.5161		transmembrane protein 134	NM_025124	TMEM134	11q13.2	membrane // integral to membrane	7949798
2.58993	2.60111	3.13083		2.77396		3.60824	2.76304	3.74085		3.37071		21.5128		---	---	---	---	---	7910010
5.86088	5.74871	5.79134		5.80031		6.59819	6.83094	7.71324		7.04745		21.5014		solute carrier family 13 (sodium-dependent dicarboxylate transporter), member 3	NM_022829	SLC13A3	20q12-q13.1	centrosome // plasma membrane // integral to membrane // cell junction	8066757
7.29695	7.40089	7.47071		7.38952		9.29446	8.52303	9.1033		8.9736		21.4368		UBX domain protein 2B	NM_001077619	UBXN2B	8q12.1	nucleus // cytoplasm // endoplasmic reticulum // Golgi apparatus // cytosol	8146544
4.65361	4.28775	4.72495		4.55544		5.69982	5.1667	5.72577		5.53076		21.4101		---	---	---	---	---	8089818
4.48747	3.58014	4.61456		4.22739		6.45829	3.93743	5.00108		5.13227		21.4051		glial cell derived neurotrophic factor	NM_000514	GDNF	5p13.1-p12	extracellular region	8111670
4.12161	3.58012	4.09686		3.93286		4.72585	3.26809	6.32765		4.77386		21.384		glucosidase, beta, acid 3 (cytosolic)	NM_020973	GBA3	4p15.2	cellular_component // cytoplasm // cytosol	8094361
6.31723	5.86144	6.83749		6.33872		8.23757	6.3562	8.4887		7.69416		21.3834		zinc finger protein 778	NM_182531	ZNF778	16q24.3	intracellular // nucleus	7997896
4.29464	3.58014	4.06749		3.98076		5.31902	3.26793	5.90624		4.83106		21.3604		ankyrin repeat domain 31	AK097510	ANKRD31	5q13.3	---	8112672
5.49998	4.85995	5.29947		5.2198		7.76109	5.48746	5.75505		6.33453		21.3559		gamma-aminobutyric acid (GABA) A receptor, pi	NM_014211	GABRP	5q33-q34	plasma membrane // integral to membrane // cell junction // chloride channel complex // synapse // postsynaptic membrane	8109926
2.8715	3.07029	3.58487		3.17555		3.7498	3.85357	3.95472		3.8527		21.3237		chromosome 1 open reading frame 168	NM_001004303	C1orf168	1p32.2	---	7916506
4.82181	4.15504	4.55673		4.51119		5.55246	5.58084	5.28568		5.47299		21.3204		---	---	---	---	---	8102160
8.14595	7.61472	7.82261		7.8611		8.80068	10.0222	9.78791		9.53692		21.318		EF-hand domain family, member D1	NM_025202	EFHD1	2q37.1	---	8049187
3.48099	3.1414	4.17277		3.59839		4.75671	4.4536	3.88405		4.36479		21.2983		---	---	---	---	---	8119078
4.15861	3.00006	4.24099		3.79988		6.62835	3.31456	3.88405		4.60898		21.2927		---	---	---	---	---	7950897
4.28758	2.19352	2.91438		3.13183		4.35606	2.86175	4.17645		3.79809		21.2738		---	---	---	---	---	8070255
4.84509	3.24957	4.13791		4.07752		5.06235	4.29848	5.47366		4.94483		21.2705		integral membrane protein 2A	NM_004867	ITM2A	Xq13.3-Xq21.2	cytoplasm // plasma membrane // integral to membrane	8173755
4.82181	3.50626	4.67062		4.3329		7.97114	3.4991	4.29303		5.25443		21.2682		solute carrier family 14 (urea transporter), member 1 (Kidd blood group)	NM_001128588	SLC14A1	18q11-q12	plasma membrane // integral to plasma membrane	8021081
5.22323	5.2049	5.10313		5.17709		7.34768	5.31653	6.16949		6.2779		21.2632		sine oculis binding protein homolog (Drosophila)	NM_018013	SOBP	6q21	---	8121319
6.1549	5.28549	5.91604		5.78548		7.4088	6.75306	6.88272		7.01486		21.2495		zinc finger protein 492	NM_020855	ZNF492	19p12	intracellular // nucleus	8027345
6.40403	6.17908	7.11842		6.56718		8.32797	7.64625	7.90845		7.96089		21.2225		CHK2 checkpoint homolog (S. pombe)	NM_001005735	CHEK2	22q11|22q12.1	nucleus // PML body	8075164
4.29553	3.80079	4.49711		4.19781		5.28291	4.85127	5.12979		5.08799		21.2059		dual specificity phosphatase 19	NM_080876	DUSP19	2q32.1	cytoplasm	8046792
6.3519	5.58469	6.48182		6.13947		7.86151	7.02016	7.44147		7.44105		21.2002		Rho guanine exchange factor (GEF) 16	NM_014448	ARHGEF16	1p36.3	intracellular	7897154
4.77047	3.72758	5.47189		4.65665		5.83113	5.42167	5.6726		5.6418		21.1558		retinol binding protein 4, plasma	NM_006744	RBP4	10q23-q24	extracellular region // extracellular space // extracellular space	7935116
5.01169	4.65113	5.06123		4.90802		6.35633	5.72419	5.75505		5.94519		21.1323		---	---	---	---	---	8026696
5.27521	5.14313	5.43863		5.28566		5.99844	7.32266	5.88279		6.4013		21.1069		fucosyltransferase 3 (galactoside 3(4)-L-fucosyltransferase, Lewis blood group)	NM_000149	FUT3	19p13.3	membrane fraction // Golgi apparatus // membrane // integral to membrane	8033054
2.42492	2.79774	3.05158		2.75808		3.38997	3.53306	3.09726		3.3401		21.1024		---	---	---	---	---	7935859
5.46342	5.39074	5.31374		5.3893		6.19828	6.21622	7.16496		6.52649		21.1009		coiled-coil domain-containing-like	NM_001080503	hCG_29977	19p13.2	---	8025868
6.2144	5.04488	5.76505		5.67478		6.4251	8.08142	6.10865		6.87172		21.0924		paired box 7	NM_002584	PAX7	1p36.13	nucleus	7898537
5.36619	4.38449	5.44793		5.0662		6.79999	6.28239	5.32173		6.1347		21.0908		pleiomorphic adenoma gene-like 1	NM_006718	PLAGL1	6q24-q25	intracellular // nucleus	8129985
6.5887	6.33069	6.85649		6.59196		8.00522	7.76145	8.17963		7.9821		21.0884		E2F transcription factor 2	NM_004091	E2F2	1p36	nucleus // nucleoplasm // transcription factor complex	7913644
6.68897	6.61405	7.0039		6.76898		8.07644	7.10177	9.40914		8.19578		21.0786		cysteine sulfinic acid decarboxylase	NM_015989	CSAD	12q13.11-q14.3	---	7963590
4.94306	4.38288	4.4664		4.59745		6.62472	5.31653	4.7566		5.56595		21.0661		cytochrome P450, family 4, subfamily F, polypeptide 11	NM_021187	CYP4F11	19p13.1	cellular_component // endoplasmic reticulum // microsome // membrane // integral to membrane	8035095
4.08769	3.50626	4.87803		4.15733		4.64994	5.9036	4.53909		5.03087		21.0122		guanine deaminase	NM_004293	GDA	9q21.13	intracellular // cytosol	8155802
5.1398	4.15504	4.10305		4.46596		6.32068	4.80047	5.0881		5.40308		20.9837		---	---	---	---	---	8061165
7.55654	7.20947	7.61015		7.45872		8.73108	8.64336	9.6935		9.02265		20.9678		latent transforming growth factor beta binding protein 3	NM_001130144	LTBP3	11q13.1	extracellular region	7949412
3.09475	3.07029	3.35633		3.17379		3.39633	2.76304	5.35779		3.83905		20.9612		small nucleolar RNA, C/D box 116-25	NR_003339	SNORD116-25	15q11.2	---	7981998
9.90497	9.68167	10.0742		9.88696		12.9526	10.3093	12.6125		11.9582		20.9487		X-box binding protein 1	NM_005080	XBP1	22q12.1|22q12	nucleus	8075182
5.39454	4.62299	4.72158		4.91303		6.07339	5.86693	5.88279		5.94104		20.924		dynein, cytoplasmic 2, light intermediate chain 1	NM_016008	DYNC2LI1	2p25.1-p24.1	cytoplasm // microtubule // cilium // dynein complex // cilium axoneme	8041676
5.60128	4.73224	4.77432		5.03595		5.26415	6.77116	6.23277		6.08936		20.9179		chromosome 12 open reading frame 59	NM_153022	C12orf59	12p13.2	membrane // integral to membrane	7953936
6.43052	6.05331	6.38155		6.28846		7.95941	7.98136	6.87044		7.60374		20.9157		synaptotagmin XII	NM_177963	SYT12	11q13.2	membrane // integral to membrane // cell junction // cytoplasmic vesicle // synapse	7941749
6.95715	6.39234	6.69184		6.68044		8.35284	7.60632	8.26681		8.07532		20.8801		growth factor receptor-bound protein 7	NM_001030002	GRB7	17q12	---	8006940
7.4533	6.24795	6.67781		6.79302		7.56171	7.9534	9.11636		8.21049		20.8665		calcium binding protein 39-like	NM_030925	CAB39L	13q14.2	---	7971590
3.24784	2.66468	3.58487		3.1658		4.537	3.12869	3.8127		3.82613		20.8583		---	---	---	---	---	8022247
7.57178	7.47574	8.07351		7.70701		9.38355	8.85444	9.70564		9.31455		20.8581		CTP synthase II	NM_175859	CTPS2	Xp22	---	8171493
2.8715	3.07029	2.77172		2.90451		3.60824	3.03608	3.88405		3.50945		20.828		---	---	---	---	---	7916020
6.29009	6.33987	5.98599		6.20532		7.5994	7.15849	7.73475		7.49755		20.8245		protocadherin beta 9	NM_019119	PCDHB9	5q31	plasma membrane // integral to membrane	8108720
4.86844	4.24679	5.47153		4.86225		6.58282	3.8955	7.14464		5.87432		20.8148		fasciculation and elongation protein zeta 1 (zygin I)	NM_005103	FEZ1	11q24.2	cytoplasm // centrosome // plasma membrane	7952490
4.68652	3.50631	3.87481		4.02255		4.82393	4.01894	5.73651		4.85979		20.8139		cytochrome P450, family 2, subfamily B, polypeptide 6	NM_000767	CYP2B6	19q13.2	endoplasmic reticulum // microsome // membrane	8028963
8.50483	8.55075	8.75616		8.60392		10.2561	9.74628	11.1812		10.3945		20.8115		phosphatidylinositol-5-phosphate 4-kinase, type II, gamma	NM_024779	PIP4K2C	12q13.3	cytoplasm // membrane	7956524
6.19484	6.06612	6.59069		6.28388		7.46704	7.39971	7.90693		7.59123		20.8047		scavenger receptor class A, member 3	NM_016240	SCARA3	8p21	endoplasmic reticulum // Golgi apparatus // membrane // integral to membrane	8145555
3.79073	3.28585	3.92285		3.66648		5.56703	3.49859	4.22186		4.42916		20.8016		POTE ankyrin domain family, member D	NM_174981	POTED	21q11.2	plasma membrane	8067844
4.89562	4.50708	4.83023		4.74431		4.85101	5.33397	7.00559		5.73019		20.7804		nuclear receptor interacting protein 3	NM_020645	NRIP3	11p15.3	---	7946446
7.36854	7.15989	7.80337		7.44393		9.47153	6.91723	10.5831		8.99062		20.7778		chloride intracellular channel 3	NM_004669	CLIC3	9q34.3	nucleus // cytoplasm // membrane // integral to membrane // chloride channel complex	8165334
3.89343	2.89775	4.61097		3.80072		5.13204	4.68925	3.94823		4.58984		20.7624		ret finger protein-like 2	NM_001098527	RFPL2	22q12.3	---	8075564
5.03968	3.83711	4.99493		4.62391		5.99826	3.8955	6.858		5.58392		20.762		glypican 3	NM_004484	GPC3	Xq26.1	extracellular region // proteinaceous extracellular matrix // extracellular space // plasma membrane // integral to plasma membrane // anchored to membrane	8175234
3.8198	2.86257	4.16577		3.61605		4.89773	3.12869	5.07314		4.36652		20.7539		dpy-19-like 2 (C. elegans)	NM_173812	DPY19L2	12q14.2	membrane // integral to membrane	7964665
7.68828	6.08749	7.86035		7.21204		9.67407	7.93583	8.51572		8.70854		20.75		---	---	---	---	---	8133070
4.08769	3.43261	4.36475		3.96168		4.35551	5.18427	4.81015		4.78331		20.7394		tudor domain containing 12	NM_001110822	TDRD12	19q13.11	---	8027482
4.97529	3.72758	4.13791		4.28026		5.79114	4.31923	5.39254		5.16764		20.7318		glycerophosphodiester phosphodiesterase domain containing 2	NM_017711	GDPD2	Xq13.1	cytoplasm // cytoskeleton // plasma membrane // integral to membrane	8168163
3.09475	2.93079	2.98414		3.00323		3.7498	3.31456	3.8127		3.62569		20.7264		---	---	---	---	---	8138043
5.18012	4.47726	5.65483		5.10407		6.64285	4.90036	6.94259		6.16193		20.7259		MPV17 mitochondrial membrane protein-like	NM_173803	MPV17L	16p13.11	peroxisome // membrane // integral to membrane	7993453
4.66268	4.05018	4.17202		4.29496		5.1625	5.88279	4.5095		5.18493		20.7214		glycine amidinotransferase (L-arginine:glycine amidinotransferase)	NM_001482	GATM	15q21.1	cytoplasm // mitochondrion // mitochondrial inner membrane // mitochondrial intermembrane space // membrane	7988414
5.56237	5.20959	5.91604		5.56267		6.79351	5.6399	7.7074		6.71361		20.6904		protein tyrosine phosphatase, receptor type, f polypeptide (PTPRF), interacting protein (liprin), alpha 3	NM_003660	PPFIA3	19q13.33	cytoplasm // cell surface	8030220
3.86465	4.24111	4.06617		4.05731		3.67799	7.41581	3.59626		4.89669		20.688		toll-like receptor 1	NM_003263	TLR1	4p14	plasma membrane // integral to plasma membrane // cytoplasmic vesicle	8099834
3.94156	3.35896	3.66093		3.65381		5.0421	3.76755	4.41915		4.4096		20.6848		olfactory receptor, family 4, subfamily L, member 1	NM_001004717	OR4L1	14q11.2	plasma membrane // integral to membrane	7973022
8.13975	7.99961	8.26813		8.13583		11.1068	8.23479	10.1124		9.81801		20.6761		family with sequence similarity 102, member A	NM_001035254	FAM102A	9q34.11	---	8164343
6.25274	5.4919	6.25516		5.99993		8.44266	5.58084	7.69353		7.23901		20.6515		zinc finger protein 92	NM_152626	ZNF92	7q11.21	intracellular // nucleus	8133089
6.88927	6.06548	6.79251		6.58242		9.15154	6.30806	8.36501		7.94154		20.6477		hypothetical protein LOC729993	NM_001145204	LOC729993	16p13.12	---	7993296
3.63668	3.35896	3.88612		3.62725		4.02833	4.09795	5.00108		4.37579		20.6364		---	---	---	---	---	7912248
7.02605	6.1492	6.87501		6.68342		8.15524	7.67146	8.36114		8.06261		20.636		exonuclease NEF-sp	NM_030941	LOC81691	16p12.3	intracellular // nucleolus	7993776
6.55848	6.18985	6.39886		6.3824		6.39113	9.45915	7.24799		7.69942		20.6352		chromosome 8 open reading frame 85	NM_001025357	C8orf85	8q24.11	---	8148000
5.59258	5.00069	5.56626		5.38651		6.5688	5.87929	7.04446		6.49752		20.6258		protocadherin alpha subfamily C, 1	NM_018898	PCDHAC1	5q31	plasma membrane // integral to plasma membrane	8108633
3.21	2.69707	3.09394		3.00034		4.22801	3.63482	2.99409		3.61897		20.6189		---	---	---	---	---	8117170
3.75237	3.6889	4.48911		3.97679		5.47267	4.21124	4.70615		4.79669		20.617		---	---	---	---	---	8155265
4.9344	4.75157	6.0084		5.23146		6.54875	5.41536	6.9647		6.3096		20.6089		small nucleolar RNA, H/ACA box 59A	NR_003025	SNORA59A	1p36.21	---	7897953
4.9344	4.75157	6.0084		5.23146		6.54875	5.41536	6.9647		6.3096		20.6089		small nucleolar RNA, H/ACA box 59A	NR_003025	SNORA59A	1p36.21	---	8005626
4.68476	4.53689	4.99358		4.73841		5.42903	5.54511	6.16991		5.71468		20.6033		synaptic vesicle glycoprotein 2C	NM_014979	SV2C	5q13.3	synaptic vesicle // membrane // integral to membrane // cell junction // cytoplasmic vesicle // synapse	8106336
3.40304	3.00006	3.50863		3.30391		3.46672	3.12869	5.35779		3.9844		20.5965		---	---	---	---	---	8139790
5.62217	5.35761	6.07428		5.68469		7.36572	6.0414	7.14981		6.85231		20.5397		hormonally up-regulated Neu-associated kinase	NM_014586	HUNK	21q22.1	---	8068180
5.67712	4.65113	5.47153		5.26659		7.03438	5.46373	6.5435		6.3472		20.5182		actin, gamma 2, smooth muscle, enteric	NM_001615	ACTG2	2p13.1	cytoplasm // cytoskeleton	8042788
4.91897	4.38288	4.33494		4.5456		5.79255	4.71862	5.91896		5.47671		20.4838		---	---	---	---	---	8180233
5.17958	4.56085	4.87727		4.87256		5.77738	5.69422	6.13964		5.87042		20.479		immunoglobulin superfamily, member 2	NM_004258	IGSF2	1p13	plasma membrane // integral to membrane	7904303
3.71401	3.00006	3.43239		3.38215		3.60824	4.80047	3.8127		4.0738		20.4501		ceruloplasmin (ferroxidase)	NM_000096	CP	3q23-q25	extracellular region // extracellular space // anchored to plasma membrane	8091385
3.40304	3.07029	3.2054		3.22624		4.41795	3.4991	3.74085		3.88597		20.4487		---	---	---	---	---	8147242
4.96359	4.35302	4.85331		4.72331		5.37171	7.12784	4.56787		5.68914		20.4481		sorbin and SH3 domain containing 1	NM_001034954	SORBS1	10q23.3-q24.1	stress fiber // nucleus // cytoplasm // cytosol // cytoskeleton // plasma membrane // insulin receptor complex // zonula adherens // cell-substrate adherens junction // cell junction // membrane raft	7935188
5.54694	4.96982	4.9005		5.13909		6.68546	5.77681	6.10729		6.18985		20.4465		potassium voltage-gated channel, subfamily G, member 3	NM_133329	KCNG3	2p21	endoplasmic reticulum // plasma membrane // voltage-gated potassium channel complex // integral to membrane	8051785
6.07011	6.33069	6.57532		6.32538		7.88092	7.45829	7.51383		7.61768		20.4305		transducin-like enhancer of split 2 (E(sp1) homolog, Drosophila)	NM_003260	TLE2	19p13.3	nucleus	8032553
4.77047	3.65398	4.24099		4.22181		5.2454	3.40716	6.6		5.08419		20.4268		hephaestin	NM_138737	HEPH	Xq11-q12	membrane // integral to membrane	8167973
3.40801	2.77964	2.35399		2.84721		2.76562	3.88219	3.63759		3.42847		20.4148		---	---	---	---	---	7976146
5.9601	4.59485	4.72495		5.0933		6.95339	6.01933	5.42648		6.13306		20.4144		---	---	---	---	---	8089285
5.83931	5.75492	5.79134		5.79519		9.67936	5.16443	6.08759		6.97713		20.3952		catenin (cadherin-associated protein), delta 2 (neural plakophilin-related arm-repeat protein)	NM_001332	CTNND2	5p15.2	nucleus // cytoplasm // adherens junction // cell junction	8110990
6.91562	6.17908	7.1017		6.73213		8.46122	7.75396	8.09895		8.10471		20.3884		proline rich 5 (renal)	NM_181333	PRR5	22q13	---	8073705
7.50187	7.81379	7.96221		7.75929		9.04693	8.45476	10.5216		9.3411		20.3861		phosphatidylinositol glycan anchor biosynthesis, class M	NM_145167	PIGM	1q23.2	endoplasmic reticulum // endoplasmic reticulum membrane // membrane // integral to membrane	7921526
3.63668	3.07029	3.95958		3.55551		4.29308	4.31923	4.2278		4.28004		20.3775		toll-like receptor 8	NM_138636	TLR8	Xp22	endosome membrane // membrane // integral to membrane	8166065
4.7972	3.17735	4.48852		4.15435		5.10216	4.17518	5.72449		5.00061		20.3704		---	---	---	---	---	7959085
7.01402	6.76211	7.43374		7.06996		8.70093	8.24012	8.58685		8.5093		20.3586		intraflagellar transport 122 homolog (Chlamydomonas)	NM_052985	IFT122	3q21	cytoplasm	8082523
4.6344	4.70574	4.27264		4.53759		5.05628	6.56649	4.75971		5.46083		20.3463		cysteine/tyrosine-rich 1	NM_052954	CYYR1	21q21.2	membrane // integral to membrane	8069668
6.60094	6.0971	6.26957		6.32254		7.24024	7.86007	7.72161		7.60731		20.3205		thyroid hormone receptor, beta (erythroblastic leukemia viral (v-erb-a) oncogene homolog 2, avian)	NM_001128176	THRB	3p24.2	nucleus	8085797
3.48099	4.08628	3.88612		3.8178		4.64994	4.31923	4.81091		4.59336		20.3144		killer cell immunoglobulin-like receptor, three domains, X1	NR_026716	KIR3DX1	19q13.42	---	8031200
4.12161	3.72679	4.03131		3.9599		5.26126	4.76856	4.26042		4.76341		20.2912		transmembrane protein 84	NR_026949	TMEM84	15q23	membrane // integral to membrane	7984511
4.71744	4.15504	4.49711		4.45653		5.85626	4.57803	5.64403		5.35944		20.2604		signaling threshold regulating transmembrane adaptor 1	NM_014450	SIT1	9p13-p12	plasma membrane // integral to plasma membrane	8161017
3.71401	3.43248	3.66093		3.60247		3.60824	4.3877	5.00108		4.33234		20.2602		---	---	---	---	---	7904953
5.73482	5.17011	6.05271		5.65255		6.47461	5.9275	7.98872		6.79694		20.2457		---	---	---	---	---	7998053
4.01463	3.83515	4.27837		4.04272		6.10707	3.08286	5.39213		4.86069		20.2332		deiodinase, iodothyronine, type I	NM_000792	DIO1	1p33-p32	endoplasmic reticulum // membrane // integral to membrane	7901565
6.34827	5.45799	6.11273		5.97299		7.51844	5.94799	8.07614		7.18085		20.222		kringle containing transmembrane protein 1	NM_001039570	KREMEN1	22q12.1	membrane fraction // membrane // integral to membrane	8072170
6.74489	6.44297	6.7466		6.64482		8.23807	7.88181	7.84553		7.98847		20.221		zinc finger protein 695	NM_020394	ZNF695	1q44	intracellular // nucleus	7925662
4.32844	4.28851	4.43216		4.3497		7.87294	3.40716	4.40692		5.22901		20.2153		sarcoglycan, gamma (35kDa dystrophin-associated glycoprotein)	NM_000231	SGCG	13q12	cytoplasm // cytoskeleton // plasma membrane // sarcoglycan complex // integral to membrane	7968004
5.01169	4.41596	4.92593		4.78453		5.35514	4.09795	7.80094		5.75134		20.2071		polycystic kidney disease 1 like 1	NM_138295	PKD1L1	7p12.3	membrane // integral to membrane	8139534
4.94306	4.53605	5.06149		4.84687		6.82498	4.40556	6.24792		5.82615		20.2045		regulator of G-protein signaling 6	NM_004296	RGS6	14q24.3	cellular_component // cytoplasm // heterotrimeric G-protein complex // membrane	7975482
6.34338	4.78442	5.81625		5.64802		6.56116	6.21387	7.59031		6.78845		20.1917		family with sequence similarity 83, member F	NM_138435	FAM83F	22q13.1	---	8073207
5.36647	5.00069	5.79134		5.38617		7.28476	5.42167	6.71433		6.47358		20.1891		synaptonemal complex central element protein 2	NM_001105578	SYCE2	19p13.2	central element // nucleus	8034583
5.09832	4.59485	4.30759		4.66692		6.04288	4.90036	5.88279		5.60868		20.1793		kinesin family member 5A	AF063608	KIF5A	12q13.13	membrane fraction // cytoplasm // kinesin complex // microtubule // ciliary rootlet // neuron projection // perinuclear region of cytoplasm	7956522
5.63082	5.04425	5.52073		5.3986		8.20353	5.0404	6.21847		6.48747		20.1695		keratin associated protein 5-2	NM_001004325	KRTAP5-2	11p15.5	keratin filament	7937696
4.65361	3.61692	4.46462		4.24505		6.69841	3.7218	4.88327		5.10116		20.1672		---	---	---	---	---	8112178
5.87405	6.05527	6.03014		5.98649		7.01361	7.193	7.37231		7.19297		20.1535		similar to hypothetical protein 9630041N07	AK300504	DKFZp686E2433	5q35.3	---	8110486
6.2291	6.52222	6.62246		6.45792		8.00771	7.94687	7.32043		7.75834		20.1367		signal-induced proliferation-associated 1 like 2	NM_020808	SIPA1L2	1q42.2	intracellular	7925062
8.20581	7.96001	8.5713		8.24571		10.283	10.0766	9.35095		9.90353		20.1053		hairy and enhancer of split 1, (Drosophila)	NM_005524	HES1	3q28-q29	nucleus // cytoplasm	8084880
8.04878	6.99997	7.36823		7.47233		10.7768	9.03552	7.11165		8.97465		20.1051		---	---	---	---	---	8180376
4.82181	5.67246	6.23614		5.5768		7.63612	4.99384	7.45948		6.69648		20.0774		coiled-coil domain containing 85A	NM_001080433	CCDC85A	2p16.1	---	8052376
4.91971	3.43248	4.17277		4.17499		5.97569	3.85357	5.20981		5.01302		20.0728		---	---	---	---	---	8031439
5.70747	4.22249	5.14503		5.025		6.39113	5.24272	6.45953		6.03113		20.0225		hypothetical LOC80054	NR_026887	LOC80054	19q13.11	---	8027564
5.75773	5.45911	6.16584		5.79422		6.84375	6.43981	7.57933		6.9543		20.0212		zinc finger protein 397	NM_001135178	ZNF397	18q12.2	intracellular // nucleus // cytoplasm	8020889
8.69567	8.40737	8.80093		8.63466		11.8107	9.97116	9.30832		10.3634		20.0208		profilin 2	NM_053024	PFN2	3q25.1-q25.2	cytoplasm // actin cytoskeleton	8091446
4.24224	3.00437	4.64084		3.96248		4.85101	4.79933	4.61503		4.75512		20.0037		---	---	---	---	---	8091118
4.82181	4.53689	5.06123		4.80664		7.72063	4.4536	5.12979		5.76801		20.0007		leucine rich repeat and fibronectin type III domain containing 5	NM_152447	LRFN5	14q21.1	membrane // integral to membrane	7974109
4.0153	3.50626	3.28061		3.60072		6.06459	3.59002	3.30797		4.32086		20		---	---	---	---	---	8102936
5.65117	4.65113	4.97239		5.09156		5.9291	4.94785	7.45126		6.1094		19.9907		transient receptor potential cation channel, subfamily V, member 3	NM_145068	TRPV3	17p13.2	membrane // integral to membrane	8011354
5.38292	3.54323	4.54935		4.49183		6.49854	4.12833	5.53927		5.38871		19.9669		chromosome 21 open reading frame 15	BX648100	C21orf15	21q11	---	8069505
6.8361	6.64388	7.08089		6.85362		7.84506	8.38311	8.43465		8.22094		19.9503		leucine rich repeat containing 8 family, member B	NM_001134476	LRRC8B	1p22.2	membrane // integral to membrane	7902861
4.89562	4.84133	4.9005		4.87915		6.82532	5.16219	5.56996		5.85249		19.949		chromosome 20 open reading frame 114	NM_033197	C20orf114	20q11.21	extracellular region	8061894
7.1319	7.27614	7.43781		7.28195		8.45093	8.68952	9.06341		8.73462		19.9489		hook homolog 2 (Drosophila)	NM_013312	HOOK2	19p13.2	cytoplasm // centrosome // cytoskeleton // microtubule // HOPS complex // FHF complex	8034521
7.07953	5.88268	6.54507		6.50242		8.75466	6.9642	7.67952		7.79946		19.947		zinc finger protein 43	NM_003423	ZNF43	19p13.1-p12	intracellular // nucleus	8035813
6.30841	5.35761	6.25516		5.97373		6.86951	6.55249	8.06612		7.16271		19.9035		ubiquitin carboxyl-terminal esterase L1 (ubiquitin thiolesterase)	NM_004181	UCHL1	4p14	intracellular // nucleus // nucleolus // cytoplasm // cytoplasm // cytosol // axon // cell soma	8094778
5.98309	5.67246	6.34663		6.00073		8.42597	4.99384	8.15485		7.19155		19.8447		paired box 9	NM_006194	PAX9	14q12-q13	nucleus	7973974
6.51182	6.14977	6.67781		6.44647		7.97688	6.97571	8.2192		7.72393		19.8165		tumor protein p53 inducible protein 11	NM_001076787	TP53I11	11p11.2	---	7947570
7.28143	7.4063	6.5089		7.06554		8.79259	7.84606	8.75734		8.46533		19.8114		zinc finger protein 737	NM_001159293	ZNF737	19p12	intracellular // nucleus	8035793
6.44689	6.29321	6.68034		6.47348		8.61813	7.20256	7.4361		7.75226		19.7542		zinc finger, SWIM-type containing 5	NM_020883	ZSWIM5	1p34.1	---	7915682
6.18492	6.04442	6.27344		6.16759		7.27044	7.11223	7.77469		7.38579		19.7515		GTF2I repeat domain containing 2B	NM_001003795	GTF2IRD2B	7q11.23	intracellular // nucleus	8133549
7.34211	7.24794	7.66094		7.417		9.40924	8.07073	9.16492		8.88163		19.747		component of oligomeric golgi complex 7	NM_153603	COG7	16p12.2	Golgi apparatus // membrane // Golgi transport complex	8000263
6.77747	6.02496	6.69395		6.49879		8.60337	6.75959	7.98281		7.78193		19.7442		H2A histone family, member J	NM_177925	H2AFJ	12p12	nucleosome // nucleus // chromosome	7954124
3.63668	3.65398	3.43239		3.57435		4.85746	3.22162	4.75971		4.2796		19.7308		---	---	---	---	---	7913663
7.61341	7.43865	7.73416		7.59541		9.46629	9.15792	8.64737		9.09052		19.6845		dual specificity phosphatase 16	NM_030640	DUSP16	12p13	nucleus // cytoplasm	7961371
4.48747	4.41514	4.51627		4.47296		5.12677	3.7218	7.21004		5.35287		19.6718		protocadherin beta 17 pseudogene	NR_001280	PCDHB17	5q31	---	8108706
5.18012	5.12953	5.43902		5.24956		6.37383	6.18712	6.28552		6.28216		19.6702		---	---	---	---	---	8121130
7.17247	7.0051	7.39986		7.19248		9.91567	7.51791	8.38602		8.60653		19.6602		unc-51-like kinase 1 (C. elegans)	NM_003565	ULK1	12q24.3	membrane fraction // cytoplasm // autophagic vacuole // cytosol // cytoplasmic vesicle membrane // neuron projection // cell soma	7959957
6.38497	6.04376	6.98724		6.47199		7.35058	9.18274	6.69725		7.74352		19.6467		forkhead box I1	NM_012188	FOXI1	5q34	nucleus	8109901
3.63668	3.35896	3.28061		3.42542		4.09614	4.17436	4.02457		4.09836		19.6456		---	---	---	---	---	8015944
8.83819	7.6806	8.21079		8.2432		11.2107	9.36879	9.00701		9.86216		19.64		---	---	---	---	---	8180269
6.43052	6.16995	6.39886		6.33311		8.05491	6.79264	7.88268		7.57674		19.637		meteorin, glial cell differentiation regulator-like	NM_001004431	METRNL	17q25.3	extracellular region	8010897
3.79073	3.07029	3.81174		3.55759		4.16294	4.24813	4.35684		4.25597		19.6308		---	---	---	---	---	8150576
5.05501	4.44661	5.08125		4.86096		5.17121	6.37923	5.89492		5.81512		19.6291		myosin light chain kinase family, member 4	NM_001012418	MYLK4	6p25.2	---	8123584
3.32526	3.50626	3.66093		3.49748		4.29308	3.4991	4.75971		4.18396		19.6279		double homeobox A	NM_001012729	DUXA	19q13.43	nucleus	8039635
3.32526	2.93079	3.2054		3.15382		3.25692	3.76755	4.29303		3.7725		19.617		---	---	---	---	---	7935025
6.36897	6.06788	6.57437		6.33707		7.93477	7.13337	7.67199		7.58004		19.6142		protein phosphatase 1, regulatory (inhibitor) subunit 3E	NR_026862	PPP1R3E	14q11.2	---	7977955
8.31401	8.53951	8.71878		8.5241		10.6611	10.6783	9.24791		10.1958		19.6111		kynureninase (L-kynurenine hydrolase)	NM_003937	KYNU	2q22.2	soluble fraction // cytoplasm // mitochondrion // cytosol // cytosol	8045539
5.83931	5.04488	5.59639		5.49353		7.17922	5.12363	7.40944		6.57076		19.6092		sal-like 2 (Drosophila)	NM_005407	SALL2	14q11.1-q12	intracellular // nucleus	7977761
3.28655	3.03517	3.39436		3.23869		4.50761	3.62599	3.48773		3.87378		19.6092		---	---	---	---	---	8154211
2.58993	2.4777	3.73661		2.93475		3.60824	3.03608	3.88405		3.50945		19.5829		---	---	---	---	---	7972367
9.40142	8.86728	9.17588		9.14819		12.0196	10.2466	10.5527		10.9396		19.5822		mitochondrial ribosomal protein S21	NM_018997	MRPS21	1q21	intracellular // mitochondrion // mitochondrial small ribosomal subunit // ribosome	7905163
3.71401	3.28585	3.66093		3.5536		4.64994	3.4991	4.59665		4.24856		19.5567		---	---	---	---	---	8053664
5.25559	4.49061	5.43286		5.05969		7.99392	4.60517	5.54659		6.04856		19.5442		glutathione peroxidase 2 (gastrointestinal)	NM_002083	GPX2	14q24.1	cytoplasm	7979658
5.05565	4.47726	4.8286		4.78717		5.2454	4.69334	7.22888		5.72254		19.5391		zinc finger protein 708	ENST00000356929	ZNF708	19p12	intracellular // nucleus	8020377
6.88528	6.49152	6.58301		6.65327		7.99146	7.43421	8.43341		7.95302		19.5356		chromosome 8 open reading frame 40	NM_001135674	C8orf40	8p11.21	membrane // integral to membrane	8146225
5.99405	5.34686	6.16752		5.83614		6.20797	4.97084	9.74936		6.97606		19.5321		variable charge, X-linked 2	NM_016378	VCX2	Xp22.32	cellular_component	8171240
4.0153	3.21329	3.35633		3.5283		4.85746	3.31456	4.47991		4.21731		19.5279		nuclear cap binding protein subunit 2-like	ENST00000372379	NCBP2L	Xq22.3	---	8169247
5.70747	5.70048	5.59639		5.66811		8.07644	5.28033	6.96586		6.77421		19.5144		trefoil factor 3 (intestinal)	NM_003226	TFF3	21q22.3	extracellular region // proteinaceous extracellular matrix // apical lamina of hyaline layer	8070567
3.86664	3.65398	4.24099		3.92053		4.59424	3.67961	5.78152		4.68512		19.5021		nuclear RNA export factor 2	NM_017809	NXF2	Xq22.1	---	8174149
6.07155	4.47726	4.97239		5.17373		6.76727	4.99384	6.78144		6.18085		19.4659		chromosome 19 open reading frame 63	ENST00000430752	C19orf63	19q13.33	membrane // integral to membrane	8038565
5.54031	4.18876	5.26189		4.99699		6.51474	5.91515	5.47584		5.96858		19.4436		SH3 and cysteine rich domain 3	NM_145064	STAC3	12q13.3	---	7964400
6.89541	6.5698	7.30585		6.92368		10.035	7.14123	7.63201		8.26941		19.4366		pregnancy specific beta-1-glycoprotein 7	NM_002783	PSG7	19q13.2	extracellular region	8037251
8.18104	8.18688	8.45483		8.27425		10.0138	9.35477	10.2767		9.88177		19.4281		zinc finger protein 778	AK295122	ZNF778	16q24.3	intracellular // nucleus	7997904
6.25274	6.64388	6.67781		6.52481		9.46542	6.85628	7.05535		7.79235		19.4265		---	---	---	---	---	8124446
7.28775	6.70046	7.31634		7.10152		7.97688	8.53085	8.9278		8.47851		19.3901		iroquois homeobox 5	NM_005853	IRX5	16q11.2-q13	nucleus	7995668
3.71371	4.12066	4.80149		4.21195		4.95247	5.22342	4.90883		5.02824		19.3802		ring finger protein 148	NM_198085	RNF148	7q31.33	membrane // integral to membrane	8142622
3.32526	3.28585	3.81174		3.47428		4.64994	3.76755	4.02457		4.14735		19.3729		---	---	---	---	---	7990892
5.21936	3.80079	5.29947		4.7732		6.86951	4.51701	5.70061		5.69571		19.3268		---	---	---	---	---	8087746
5.61949	5.02279	5.62561		5.42263		6.10692	6.2641	7.03898		6.47		19.3148		CTAGE family, member 6	NM_178561	CTAGE6	7q35	cellular_component	8136936
6.23051	6.00074	5.99003		6.07376		6.29332	8.92311	6.52229		7.24624		19.304		keratin 6A	NM_005554	KRT6A	12q12-q13	cellular_component // keratin filament	7963421
3.28655	3.17735	3.47051		3.31147		4.41143	3.45313	3.98697		3.95051		19.2979		solute carrier family 25 (mitochondrial carrier; adenine nucleotide translocator), member 31	NM_031291	SLC25A31	4q28.1	mitochondrion // mitochondrial inner membrane // cilium // membrane // integral to membrane // flagellum	8097327
3.32526	3.07029	3.05704		3.15086		4.35621	3.03608	3.88405		3.75878		19.2936		hematopoietic prostaglandin D synthase	NM_014485	HPGDS	4q22.3	cytoplasm	8101780
6.71773	7.10854	6.83771		6.88799		8.35284	7.77388	8.51966		8.21546		19.2722		ankyrin repeat domain 5	NM_022096	ANKRD5	20pter-q11.23	---	8060949
4.96641	5.6439	5.6259		5.41207		5.99844	7.48271	5.88279		6.45465		19.264		hydroxysteroid (17-beta) dehydrogenase 6 homolog (mouse)	NM_003725	HSD17B6	12q13	intracellular // endosome // endoplasmic reticulum // microsome // membrane	7956271
6.61837	5.8106	5.87719		6.10206		7.4866	7.12262	7.22163		7.27695		19.2541		chromosome 17 open reading frame 97	NM_001013672	C17orf97	17p13.3	---	8003607
3.86664	4.22249	4.4357		4.17494		4.22863	5.42167	5.28568		4.97866		19.2509		ATPase type 13A4	NM_032279	ATP13A4	3q29	membrane // integral to membrane	8092800
8.13573	6.83291	8.29178		7.75347		11.1408	6.80559	9.78628		9.24422		19.2269		histone cluster 2, H2be	NM_003528	HIST2H2BE	1q21-q23	nucleosome // nucleus // chromosome	7919637
6.51487	6.50563	6.83138		6.61729		8.74098	7.05628	7.87028		7.88918		19.2207		CENPB DNA-binding domains containing 1	NM_145039	CENPBD1	16q24.3	---	8003553
6.25163	6.07681	6.27344		6.20062		7.30315	7.0913	7.78134		7.39193		19.2127		GTF2I repeat domain containing 2	NM_173537	GTF2IRD2	7q11.23	intracellular // nucleus	8140170
4.36135	4.5915	4.8031		4.58532		6.04271	4.60074	5.7548		5.46608		19.2084		growth differentiation factor 9	NM_005260	GDF9	5q31.1	extracellular region // extracellular space	8114080
5.01169	3.87342	4.24099		4.37537		5.72603	4.24813	5.6726		5.21559		19.2033		zinc finger protein 434	NM_017810	ZNF434	16p13.3	intracellular // nucleus	7992895
7.48943	7.23056	7.70023		7.47341		9.75992	9.29445	7.66802		8.90746		19.1888		family with sequence similarity 46, member A	NM_017633	FAM46A	6q14	---	8127778
7.79359	7.0762	7.79684		7.55554		9.44333	8.84785	8.72323		9.0048		19.1814		pyruvate dehydrogenase kinase, isozyme 3	NM_005391	PDK3	Xp22.11	mitochondrion // mitochondrial matrix	8166511
4.65909	4.61799	4.64259		4.63989		6.28837	4.54518	5.7548		5.52945		19.172		---	---	---	---	---	7946851
6.8361	7.04441	7.43781		7.10611		8.68975	7.90004	8.8138		8.46787		19.1632		solute carrier family 37 (glycerol-3-phosphate transporter), member 1	NM_018964	SLC37A1	21q22.3	membrane // integral to membrane	8068810
7.3945	7.40089	7.90918		7.56819		9.17725	7.95921	9.91887		9.01844		19.1625		ganglioside-induced differentiation-associated protein 1	NM_018972	GDAP1	8q21.11	cytoplasm	8146945
6.09036	5.35719	6.21217		5.88657		6.58384	8.09453	6.36428		7.01422		19.1562		tubulin, alpha 8	NM_018943	TUBA8	22q11.1	microtubule // protein complex	8071147
7.83993	8.51058	8.7668		8.37244		9.35188	9.45165	11.1236		9.97572		19.1496		aldehyde dehydrogenase 6 family, member A1	NM_005589	ALDH6A1	14q24.3	mitochondrion	7980098
5.88141	4.75793	5.42219		5.35384		7.72394	4.7206	6.68923		6.37793		19.128		G protein-coupled receptor 143	NM_000273	GPR143	Xp22.3	membrane fraction // cytoplasm // membrane // integral to membrane	8171284
6.11383	5.24803	5.98599		5.78262		7.15917	7.14835	6.35766		6.8884		19.1224		DMRT-like family A1	NM_022160	DMRTA1	9p21.2	nucleus	8154656
8.33206	7.89483	7.92708		8.05132		9.55637	9.93053	9.28542		9.59078		19.1205		leucine rich repeat containing 1	NM_018214	LRRC1	6p12.1	cytoplasm // membrane	8120279
6.2619	5.97567	6.16752		6.13503		7.76095	6.71131	7.45117		7.30781		19.1162		asteroid homolog 1 (Drosophila)	NM_014065	ASTE1	3q22.1	---	8090664
7.52553	6.45936	6.80408		6.92966		9.08859	6.54425	9.12413		8.25232		19.087		zinc finger protein 385A	NM_015481	ZNF385A	12q13.13	intracellular // nucleus // nucleolus // cytoplasm	7963774
7.13695	7.11832	7.11725		7.12418		9.05917	7.78045	8.61145		8.48369		19.0831		immunoglobulin superfamily, member 3	NM_001542	IGSF3	1p13	membrane // integral to membrane	7918913
4.22792	4.35302	3.58487		4.05527		4.90566	4.57803	5.00108		4.82825		19.0612		---	---	---	---	---	8092081
7.78629	7.30275	7.89371		7.66092		8.92603	9.23369	9.20302		9.12091		19.0577		hyaluronan-mediated motility receptor (RHAMM)	NM_001142556	HMMR	5q33.2-qter	cytoplasm // cell surface	8109712
4.3295	3.17735	4.30008		3.93564		4.81101	4.0559	5.18901		4.68531		19.0481		prolactin	NM_000948	PRL	6p22.2-p21.3	extracellular region	8124185
4.36135	3.50626	3.88612		3.91791		5.16738	4.80047	4.02457		4.66414		19.0468		pleckstrin homology domain containing, family G (with RhoGef domain) member 1	NM_001029884	PLEKHG1	6q25.1	intracellular	8122756
4.0153	3.50626	4.4357		3.98575		5.35514	4.01894	4.8606		4.7449		19.0464		---	---	---	---	---	7944162
6.90994	6.3038	6.63491		6.61622		7.76773	7.2655	8.59248		7.87524		19.0293		---	---	---	---	---	8180274
5.26439	5.39074	5.61847		5.42453		6.65722	5.87846	6.83308		6.45625		19.0195		chromosome 15 open reading frame 58	NM_001013657	C15orf58	15q26.1	---	7985959
4.94878	4.88265	4.69779		4.84307		6.59765	5.02769	5.66676		5.76403		19.016		chromosome 9 open reading frame 66	NM_152569	C9orf66	9p24.3	---	8159838
8.24976	8.28763	9.09407		8.54382		10.0928	9.75055	10.6572		10.1668		18.9964		P450 (cytochrome) oxidoreductase	NM_000941	POR	7q11.2	endoplasmic reticulum // membrane	8133670
5.08863	5.18665	5.2016		5.15896		6.52247	5.3523	6.5385		6.13776		18.9728		chromosome 6 open reading frame 124	NR_027906	C6orf124	6q27	cellular_component	8130817
6.11383	6.00003	6.49796		6.20394		7.9826	6.5829	7.57747		7.38099		18.9727		phosphatidic acid phosphatase type 2 domain containing 2	NM_203453	PPAPDC2	9p24.1	membrane // integral to membrane	8154151
4.66268	4.15504	3.95958		4.2591		5.88095	4.31923	5.00108		5.06708		18.9709		hypothetical LOC400511	AK127191	FLJ45256	16p12.1	---	8000371
3.48099	3.39606	3.66074		3.51259		4.64994	3.49859	4.38799		4.17884		18.9673		hypothetical FLJ20712	ENST00000311067	FLJ20712	7p14.3	---	8132245
6.63305	6.10855	6.93524		6.55895		8.22367	7.32969	7.85179		7.80172		18.9476		tetraspanin 33	NM_178562	TSPAN33	7q32.1	membrane // integral to membrane	8136067
4.71744	4.15504	5.1852		4.68589		5.72603	4.99384	6.00014		5.57334		18.9386		cytochrome P450, family 4, subfamily Z, polypeptide 1	NM_178134	CYP4Z1	1p33	endoplasmic reticulum // microsome // membrane // integral to membrane	7901287
5.36647	4.35302	5.10372		4.94107		5.42395	6.50562	5.70061		5.87673		18.9363		thrombospondin, type I, domain containing 7A	NM_015204	THSD7A	7p21.3	membrane // integral to membrane	8138231
2.94491	3.1414	2.8414		2.9759		3.5374	2.853	4.2278		3.5394		18.9354		---	---	---	---	---	7996805
4.66268	4.41596	4.37252		4.48372		4.80782	6.53704	4.6526		5.33249		18.93		serine-arginine repressor protein (35 kDa)	NM_080743	SRrp35	6q15	nucleus // nucleoplasm	8128079
2.94491	3.80079	2.57011		3.10527		3.7498	4.01894	3.30797		3.69224		18.9025		---	---	---	---	---	8118611
3.71401	3.43248	4.10305		3.74985		4.70409	4.01894	4.6526		4.45854		18.8994		---	---	---	---	---	8005685
4.48653	3.8005	3.50804		3.93169		5.11844	4.2693	4.63617		4.67464		18.8963		---	---	---	---	---	7946328
2.6255	2.21852	2.67723		2.50708		3.36134	2.37732	3.2038		2.98082		18.896		---	---	---	---	---	7947510
3.55894	3.43248	2.8414		3.27761		5.67046	2.853	3.1665		3.89665		18.8872		KIAA1024-like	ENST00000334562	KIAA1024L	5q23.3	membrane // integral to membrane	8107847
5.36647	4.75873	5.6259		5.25037		6.18845	5.99691	6.53925		6.24154		18.8782		---	---	---	---	---	8180276
3.94156	3.28585	3.58487		3.60409		4.537	3.40716	4.90883		4.28433		18.874		---	---	---	---	---	7951420
5.09591	4.96442	5.41984		5.16005		5.78547	5.82741	6.78726		6.13338		18.8627		N-acetylneuraminate pyruvate lyase (dihydrodipicolinate synthase)	NM_030769	NPL	1q25	cytoplasm	7908003
5.81389	5.45948	6.31073		5.86137		7.65772	6.44067	6.7945		6.96429		18.8169		---	---	---	---	---	7970426
6.27154	6.44297	6.94698		6.55383		7.98829	6.84377	8.5275		7.78652		18.8087		---	---	---	---	---	8180281
4.74224	4.81011	4.92303		4.82513		7.03765	4.41812	5.74157		5.73245		18.804		sodium channel, voltage gated, type VIII, alpha subunit	NM_014191	SCN8A	12q13	voltage-gated sodium channel complex // membrane // integral to membrane	7955502
4.91971	4.15504	4.30759		4.46078		5.52139	5.24272	5.12979		5.29797		18.7677		similar to Fc fragment of IgG binding protein	ENST00000313865	LOC731797	19q13.12	---	8027744
7.59436	8.03893	8.51326		8.04885		9.82326	9.35285	9.49986		9.55865		18.758		serine incorporator 5	NM_178276	SERINC5	5q14.1	endoplasmic reticulum // Golgi apparatus // membrane // integral to membrane // myelin sheath	8112865
4.77047	4.01633	5.29947		4.69542		6.44179	5.03841	5.24823		5.57615		18.7571		amyotrophic lateral sclerosis 2 (juvenile) chromosome region, candidate 8	NM_024744	ALS2CR8	2q33.2	nucleus // nucleoplasm // nucleolus	8047577
4.15861	4.28851	4.10305		4.18339		5.58288	4.31923	5.00108		4.96773		18.7489		---	---	---	---	---	7991399
4.29197	4.07691	5.29947		4.55612		5.7508	3.93275	6.54697		5.41017		18.7453		KIAA1407	AK302488	KIAA1407	3q13.31	---	8089659
6.8979	6.88266	7.36091		7.04715		8.25706	8.00486	8.83922		8.36705		18.7294		plakophilin 3	NM_007183	PKP3	11p15	nucleus // desmosome	7937363
7.41385	7.96578	8.38028		7.91997		7.83483	11.3459	9.02792		9.40288		18.7237		aldehyde dehydrogenase 1 family, member A3	NM_000693	ALDH1A3	15q26.3	cytoplasm	7986446
4.36135	3.28585	3.88612		3.84444		4.02833	4.4536	5.20981		4.56391		18.7146		hypothetical locus FLJ32742	AK057304	FLJ32742	Xp21.3	---	8166585
8.16618	7.59992	8.13638		7.9675		8.72768	9.6418	10.0014		9.45697		18.6944		iroquois homeobox 3	NM_024336	IRX3	16q12.2	nucleus // cytoplasm	8001449
9.48433	9.5411	9.96922		9.66488		13.1724	10.3629	10.8796		11.4716		18.694		nuclear receptor coactivator 3	NM_181659	NCOA3	20q12	nucleus // cytoplasm	8063211
6.20445	6.10536	6.2882		6.19934		7.83789	6.5677	7.66892		7.35817		18.6928		regulating synaptic membrane exocytosis 4	NM_182970	RIMS4	20q13.12	cell junction // synapse	8066451
4.29553	3.43248	3.81174		3.84658		5.2454	3.59002	4.8606		4.56534		18.6858		---	---	---	---	---	7955906
6.11383	4.85995	5.91604		5.62994		7.03266	5.31698	7.69353		6.68106		18.6702		leucine rich repeat containing 46	NM_033413	LRRC46	17q21.32	---	8008040
7.27849	6.79443	7.09151		7.05481		8.32612	8.39173	8.39663		8.37149		18.6636		peroxisomal biogenesis factor 7	NM_000288	PEX7	6q23.3	cytoplasm // peroxisome	8122242
5.83931	5.45948	5.73827		5.67902		6.50669	6.48966	7.21923		6.73853		18.6565		NHL repeat containing 1	NM_198586	NHLRC1	6p22.3	nucleus // endoplasmic reticulum // perinuclear region of cytoplasm	8124129
5.67959	4.75873	6.15748		5.53193		6.10707	8.45476	5.12979		6.56388		18.6543		fibroblast growth factor 2 (basic)	NM_002006	FGF2	4q26-q27	extracellular region // extracellular region // extracellular space	8097256
3.94156	3.07029	4.37252		3.79479		4.75671	4.09795	4.6526		4.50242		18.6475		---	---	---	---	---	8172656
7.8345	7.88875	8.64883		8.12403		9.41771	9.52133	9.97442		9.63782		18.6335		chromosome 21 open reading frame 33	NM_004649	C21orf33	21q22.3	mitochondrion	8069026
8.49154	7.94999	8.1961		8.21254		8.91785	7.44428	12.8611		9.74107		18.6121		G antigen 12B	NM_001127345	GAGE12B	Xp11.23	---	8167573
4.29553	3.94532	4.67062		4.30382		7.04364	3.31456	4.95564		5.10461		18.6064		EPH receptor A7	NM_004440	EPHA7	6q16.1	membrane // integral to membrane	8128284
6.95021	6.50773	7.06534		6.8411		8.45801	7.8546	8.02756		8.11339		18.5978		iroquois homeobox 2	NM_033267	IRX2	5p15.33	nucleus	8110872
3.94156	4.08628	3.95958		3.9958		4.29308	2.67442	7.24799		4.7385		18.5868		ankyrin repeat domain 20B	NR_003366	ANKRD20B	2q11.1	---	7919146
7.93224	7.81379	8.31007		8.0187		9.87334	9.45915	9.19477		9.50909		18.5864		zinc finger with KRAB and SCAN domains 1	NM_003439	ZKSCAN1	7q21.3-q22.1	intracellular // nucleus // cytoplasm // mitochondrion	8134680
6.96293	6.79391	7.13024		6.96236		8.22083	8.06223	8.48171		8.25492		18.565		ATG10 autophagy related 10 homolog (S. cerevisiae)	NM_031482	ATG10	5q14.1-q14.2	intracellular // cytoplasm	8106709
3.32526	3.50631	4.03194		3.62117		4.32058	4.28368	4.27569		4.29332		18.5616		---	---	---	---	---	8006606
8.85318	8.83277	9.03854		8.90817		10.4371	10.1135	11.1318		10.5608		18.5519		dehydrogenase E1 and transketolase domain containing 1	NM_018706	DHTKD1	10p14	mitochondrion	7926170
5.67959	5.4919	5.73827		5.63659		6.4251	7.20812	6.40949		6.68091		18.5275		REST corepressor 2	NM_173587	RCOR2	11q13.1	nucleus // transcription factor complex	7949021
7.28097	6.67244	6.6254		6.85961		9.06443	7.51765	7.8084		8.13016		18.5223		family with sequence similarity 117, member B	NM_173511	FAM117B	2q33.2	---	8047565
6.07155	5.61475	6.98164		6.22265		7.72063	6.81843	7.58501		7.37469		18.5137		hypothetical protein LOC100133144	NR_024474	LOC100133144	15q25.2	---	7985402
5.33107	4.47726	5.2243		5.01088		5.85626	5.16443	6.7945		5.93839		18.5101		hydroxysteroid (17-beta) dehydrogenase 14	NM_016246	HSD17B14	19q13.33	cytoplasm // cytosol	8038213
2.8715	2.56994	2.91277		2.78474		3.29223	2.63087	3.97656		3.29988		18.4989		small nucleolar RNA, C/D box 116-26	NR_003340	SNORD116-26	15q11.2	---	7982000
6.5919	6.69718	7.12761		6.80557		7.71651	7.37319	9.09936		8.06302		18.4769		transmembrane protein 79	NR_026678	TMEM79	1q22	membrane // integral to membrane	7906146
3.63341	5.32152	5.65084		4.86859		6.08907	5.37574	5.83637		5.76706		18.4544		---	---	---	---	---	8089873
7.0307	7.04977	7.29141		7.12396		9.34506	6.43232	9.5384		8.4386		18.4537		ATP-binding cassette, sub-family A (ABC1), member 2	NM_001606	ABCA2	9q34	lysosomal membrane // microtubule organizing center // membrane // integral to membrane // integral to membrane // cytoplasmic membrane-bounded vesicle // ATP-binding cassette (ABC) transporter complex	8165345
7.4196	6.85143	7.29029		7.18711		8.48135	7.3651	9.69285		8.5131		18.4496		KIAA1161	NM_020702	KIAA1161	9p13.3	membrane // integral to membrane	8160786
1.95445	2.21852	2.50816		2.22704		3.32636	2.37921	2.20696		2.63751		18.4311		---	---	---	---	---	8066210
2.65839	2.56994	3.20572		2.81135		3.53808	3.17605	3.27421		3.32945		18.4287		zinc finger protein 705A	NM_001004328	ZNF705A	12p13.31	intracellular // nucleus	7953733
6.24297	5.52224	5.95139		5.90554		6.57254	7.01466	7.3927		6.9933		18.4195		zinc finger, DHHC-type containing 11	NM_024786	ZDHHC11	5p15.33	membrane // integral to membrane	8110721
2.60066	2.83013	2.50617		2.64565		2.77861	2.853	3.76719		3.13294		18.4182		---	---	---	---	---	7944333
4.74395	3.65352	4.3588		4.25209		5.8686	3.40716	5.82949		5.03508		18.4142		tetratricopeptide repeat domain 25	NM_031421	TTC25	17q21.2	cytoplasm	8007176
6.43052	5.95423	6.56044		6.31506		7.39172	6.65626	8.38373		7.47724		18.4032		EPS8-like 1	NM_133180	EPS8L1	19q13.42	cellular_component // cytoplasm	8031414
5.92094	5.55431	6.18872		5.88799		6.53674	6.17549	8.20169		6.97131		18.3988		TLR4 interactor with leucine rich repeats	NM_014817	TRIL	7p14.3	membrane // integral to membrane	8138799
4.08769	3.1414	4.17277		3.80062		4.90566	4.17436	4.41915		4.49972		18.3944		anoctamin 3	NM_031418	ANO3	11p14.2	membrane // integral to membrane // chloride channel complex	7939024
7.7946	7.45641	8.04372		7.76491		9.11288	9.27325	9.19026		9.19213		18.3804		F-box protein 25	NM_183421	FBXO25	8p23.3|tdb9938	ubiquitin ligase complex // nucleus	8049961
6.96871	6.18985	6.54507		6.56788		7.68602	7.03191	8.60365		7.77386		18.3618		transmembrane protein 125	NM_144626	TMEM125	1p34.2	cellular_component // membrane // integral to membrane	7900654
5.25756	4.01633	4.67062		4.64817		5.9291	3.67961	6.89489		5.5012		18.352		SLIT and NTRK-like family, member 4	NM_173078	SLITRK4	Xq27.3	membrane // integral to membrane	8175574
4.29197	3.65398	3.81137		3.91911		5.37003	3.4991	5.04459		4.63791		18.341		---	---	---	---	---	7996239
2.33053	3.0361	2.68836		2.685		3.02517	3.35936	3.1477		3.17741		18.3394		---	---	---	---	---	7911136
4.77047	4.22249	4.87803		4.62366		6.67144	5.20411	4.53909		5.47155		18.338		Rap guanine nucleotide exchange factor (GEF) 4	NM_007023	RAPGEF4	2q31-q32	intracellular // membrane fraction // cytoplasm // cAMP-dependent protein kinase complex // membrane	8046428
4.66268	4.65113	5.43902		4.91761		6.45829	4.69334	6.30389		5.81851		18.3199		---	---	---	---	---	7905731
4.48747	3.87342	3.66093		4.00727		4.99793	4.51701	4.70695		4.74063		18.3006		---	---	---	---	---	8121064
3.95526	3.14296	3.36376		3.48733		4.87732	3.59002	3.90845		4.12526		18.293		---	---	---	---	---	8160258
5.59018	5.24357	5.56594		5.46656		7.00693	5.4383	6.95385		6.46636		18.2893		frequently rearranged in advanced T-cell lymphomas	NM_005479	FRAT1	10q24.1	cytoplasm	7929616
4.65464	4.35223	5.07512		4.694		5.74681	3.58935	7.32128		5.55248		18.289		mitogen-activated protein kinase 10	NM_138980	MAPK10	4q22.1-q23	cytoplasm	8101587
4.15861	3.00006	3.58487		3.58118		4.59424	4.01894	4.09346		4.23555		18.2724		---	---	---	---	---	7939990
3.58029	3.17556	3.5745		3.44345		3.70838	4.66295	3.84487		4.07206		18.2553		---	---	---	---	---	8143894
4.57507	4.18064	5.33564		4.69712		5.59593	5.45155	5.61489		5.55412		18.2454		zinc finger protein 599	NM_001007248	ZNF599	19q13.11	intracellular // nucleus	8036038
4.42534	3.43248	4.49711		4.11831		4.80782	5.20411	4.59665		4.86953		18.241		NEDD4 binding protein 2-like 1	NM_052818	N4BP2L1	13q12-q13	---	7970892
3.88826	3.17807	3.66018		3.5755		4.35343	4.26798	4.05902		4.22681		18.2157		interleukin 1 receptor accessory protein-like 2	NM_017416	IL1RAPL2	Xq22.2-q22.3	membrane // integral to membrane	8169094
2.94491	3.14179	3.02059		3.03576		3.64366	3.45313	3.66856		3.58845		18.206		synaptonemal complex protein 3	NM_153694	SYCP3	12q	nucleus	7965800
2.79923	2.93079	2.57011		2.76671		3.18812	3.31456	3.30797		3.27022		18.1987		---	---	---	---	---	8039672
4.29553	3.28585	4.49711		4.02616		5.16738	4.24813	4.8606		4.7587		18.1945		---	---	---	---	---	8016429
8.28194	8.27862	8.85046		8.47034		10.4728	8.92621	10.6252		10.0081		18.1544		3-hydroxy-3-methylglutaryl-Coenzyme A synthase 1 (soluble)	NM_001098272	HMGCS1	5p14-p13	soluble fraction // cytoplasm // cytosol	8111941
3.24784	3.1414	4.37252		3.58725		4.80782	3.67961	4.2278		4.23841		18.152		---	---	---	---	---	8091279
4.91971	4.41596	5.01747		4.78438		6.22748	4.94785	5.78152		5.65228		18.1404		---	---	---	---	---	7961652
5.05565	4.47726	4.92593		4.81961		6.06459	4.94785	6.06622		5.69289		18.1192		S100 calcium binding protein A1	NM_006271	S100A1	1q21	cytoplasm // sarcoplasmic reticulum // protein complex	7905581
5.43477	4.90828	4.87803		5.07369		6.2081	5.6399	6.12941		5.99247		18.1087		glutamic-oxaloacetic transaminase 1-like 1	NM_152413	GOT1L1	8p11.23	cytoplasm	8150244
6.028	5.37499	5.93974		5.78091		7.38217	7.11223	5.98878		6.82773		18.1082		neuroblastoma breakpoint family, member 4	NM_001143989	NBPF4	1p13.3	---	7918203
4.20718	4.17534	4.36905		4.25052		5.30119	4.28368	5.47147		5.01878		18.0744		---	---	---	---	---	7980906
7.51927	6.57299	7.15867		7.08364		8.63868	7.79439	8.65823		8.36377		18.0716		F-box protein 25	NM_183421	FBXO25	8p23.3|tdb9938	ubiquitin ligase complex // nucleus	8144239
3.17096	2.53878	3.05704		2.92226		3.89024	3.22162	3.23691		3.44959		18.0453		---	---	---	---	---	8074556
4.79449	4.0513	5.07512		4.6403		5.25836	3.93626	7.23644		5.47702		18.0315		calneuron 1	NM_001017440	CALN1	7q11	---	8139921
7.60853	7.29437	7.14331		7.34874		9.03695	8.72395	8.25922		8.67337		18.0254		unkempt homolog (Drosophila)	NM_001080419	UNK	17q25.1	---	8009995
3.40313	3.1414	3.243		3.26251		4.0613	3.89325	3.59626		3.85027		18.0155		---	---	---	---	---	8175215
5.03367	4.35223	5.03935		4.80842		5.32851	4.0559	7.63865		5.67435		18.0087		roundabout, axon guidance receptor, homolog 2 (Drosophila)	NM_002942	ROBO2	3p12.3	cell surface // membrane // integral to membrane	8081001
5.50533	4.52362	5.40497		5.14464		6.44179	5.31289	6.45869		6.07112		18.0087		abhydrolase domain containing 1	NM_032604	ABHD1	2p23.3	membrane // integral to membrane	8040815
6.39627	4.94896	5.85369		5.73297		6.47013	5.91555	7.90985		6.76517		18.0047		transmembrane protein 86A	NM_153347	TMEM86A	11p15.1	membrane // integral to membrane	7938812
3.59781	3.8005	3.43316		3.61049		4.41722	3.76755	4.59584		4.2602		17.9952		---	---	---	---	---	7993831
4.29553	3.58014	4.24099		4.03889		5.12677	4.51701	4.6526		4.76546		17.9895		---	---	---	---	---	8020088
7.1066	6.65091	6.93481		6.89744		7.85621	7.74325	8.80574		8.13507		17.9433		protease, serine, 22	NM_022119	PRSS22	16p13.3	extracellular region	7998878
5.60677	5.29821	6.5857		5.83023		7.33393	5.91515	7.37823		6.87577		17.9332		ribosomal protein L32 pseudogene 3	NR_003111	RPL32P3	3q21.3	---	8090559
4.08769	3.72758	4.87803		4.2311		4.59424	5.16443	5.20981		4.98949		17.9242		---	---	---	---	---	8128604
3.54738	2.57119	3.84809		3.32222		3.92494	3.63333	4.19452		3.9176		17.921		---	---	---	---	---	8172026
4.0153	3.21329	3.66093		3.62984		4.22863	4.31923	4.29303		4.2803		17.9198		cell wall biogenesis 43 C-terminal homolog (S. cerevisiae)	NM_025087	CWH43	4p11	membrane // integral to membrane	8094988
8.84315	8.96001	9.34514		9.04943		12.0522	9.15194	10.8065		10.6702		17.9105		chromosome 6 open reading frame 211	BC011348	C6orf211	6q25.1	---	8122818
8.03355	7.79767	8.12182		7.98435		9.98269	9.35299	8.90541		9.4137		17.9019		zinc finger protein 1 homolog (mouse)	NM_153688	ZFP1	16q23.1	intracellular // nucleus	7997257
3.79073	3.87342	4.72495		4.1297		4.70409	4.17436	5.72809		4.86885		17.8982		ATP/GTP binding protein-like 2	NM_024783	AGBL2	11p11.2	nucleolus // cytoplasm // cytoskeleton	7947947
4.42534	3.07029	3.66093		3.71885		4.95247	4.17436	4.02457		4.3838		17.8805		chemokine (C-C motif) ligand 23	NM_005064	CCL23	17q12	extracellular region // extracellular space	8014361
5.40102	5.55463	5.98599		5.64722		7.36572	5.97414	6.62945		6.65643		17.8711		FH2 domain containing 1	NM_033393	FHDC1	4q31.3	---	8097829
5.85751	5.2836	5.94387		5.69499		6.66138	6.47022	7.00621		6.7126		17.8684		zinc finger protein 678	NM_178549	ZNF678	1q42.13	intracellular // nucleus	7910190
5.11906	4.53689	4.74133		4.79909		5.1059	5.59576	6.26751		5.65639		17.8637		zinc finger protein 454	NM_182594	ZNF454	5q35.3	intracellular // nucleus	8110478
4.66178	4.05018	4.02945		4.24714		5.37003	3.93743	5.7091		5.00552		17.8564		zinc finger protein 396	NM_145756	ZNF396	18q12	intracellular // nucleus // cytoplasm	8022892
6.18492	6.5391	6.81752		6.51385		7.97359	7.17438	7.88061		7.67619		17.8442		zinc finger protein 766	NM_001010851	ZNF766	19q13.41	intracellular // nucleus	8030899
4.87076	3.61692	4.68757		4.39175		5.95183	3.93743	5.63679		5.17535		17.8426		LLP homolog, long-term synaptic facilitation (Aplysia)	NM_032338	LLPH	12q14.3	---	7956876
4.66268	3.94532	4.30759		4.3052		5.08503	5.77776	4.35684		5.07321		17.8392		flavin containing monooxygenase 6 pseudogene	NR_002601	FMO6P	1q24.3	endoplasmic reticulum // microsome // membrane // integral to membrane // intrinsic to endoplasmic reticulum membrane	7907260
5.83931	5.66801	6.31954		5.94229		6.425	7.47056	7.1104		7.00199		17.8332		beta-1,4-N-acetyl-galactosaminyl transferase 3	NM_173593	B4GALNT3	12p13.33	Golgi apparatus // membrane // integral to membrane // Golgi cisterna membrane	7952927
5.33565	4.53605	5.14447		5.00539		6.63341	4.87416	6.18506		5.89754		17.8238		chromosome 9 open reading frame 106	NM_001012715	C9orf106	9q34.11	---	8158539
4.19327	3.03517	3.84893		3.69246		4.84602	3.49859	4.70695		4.35052		17.8218		small Cajal body-specific RNA 15	NR_003011	SCARNA15	15q25.2	---	7985480
6.00572	5.35761	6.25516		5.87283		6.72698	5.51926	8.51178		6.91934		17.8195		RasGEF domain family, member 1A	NM_145313	RASGEF1A	10q11.21	intracellular	7933149
10.7982	10.8019	11.2911		10.9637		13.0962	12.1282	13.5274		12.9173		17.8182		heat shock 27kDa protein 1	NM_001540	HSPB1	7q11.23	nucleus // cytoplasm // spindle // cytoskeleton // cell surface	8133721
2.79923	2.86257	3.05704		2.90628		3.7498	2.853	3.66866		3.42382		17.8077		---	---	---	---	---	8132984
4.42162	3.97985	5.36172		4.58773		6.28979	4.94106	4.98278		5.40454		17.8043		---	---	---	---	---	8164848
7.15233	6.8202	7.15362		7.04205		9.11616	7.11752	8.65107		8.29492		17.7913		membrane-associated ring finger (C3HC4) 9	NM_138396	2009-03-01	12q14.1	lysosome // Golgi apparatus // membrane // integral to membrane	7956623
6.2144	4.65113	5.43902		5.43485		7.45064	5.58084	6.17005		6.40051		17.768		chromosome 10 open reading frame 81	AK292867	C10orf81	10q25.3	---	7930593
3.17096	3.00006	3.58487		3.25196		4.09614	3.03608	4.35684		3.82969		17.7654		protein-L-isoaspartate (D-aspartate) O-methyltransferase domain containing 1	NM_052937	PCMTD1	8q11.23	cytoplasm	8146427
6.25274	5.65818	6.2738		6.06157		7.05388	5.68259	8.67778		7.13808		17.7596		cysteine-rich protein 1 (intestinal)	NM_001311	CRIP1	14q32.33	cytoplasm	7977409
4.0153	3.72758	4.30759		4.01682		2.49366	7.0429	4.6526		4.72972		17.7478		protein tyrosine phosphatase, non-receptor type 20A	NM_001042390	PTPN20A	10q11.22	nucleus // cytoplasm // microtubule	7933442
2.9082	2.79544	2.8414		2.84835		3.36134	2.67518	4.02457		3.3537		17.7418		---	---	---	---	---	8139784
6.11383	5.52361	6.41585		6.01776		7.8944	6.37266	6.98875		7.08527		17.7393		Nedd4 binding protein 3	NM_015111	N4BP3	5q35.3	cytoplasm // membrane // cytoplasmic vesicle	8110430
3.17096	2.79544	3.95958		3.30866		3.95965	3.4991	4.2278		3.89552		17.7371		homeobox C14	NM_001145465	LOC360030	12p13.31	nucleus	7953670
6.42669	5.65761	6.37733		6.15388		6.11533	9.93747	5.68114		7.24465		17.725		peptidase inhibitor 3, skin-derived	NM_002638	PI3	20q12-q13	extracellular region // proteinaceous extracellular matrix	8062927
6.01168	6.15902	5.7648		5.9785		6.99426	6.926	7.19279		7.03768		17.7166		transmembrane protein 182	NM_144632	TMEM182	2q12.1	membrane // integral to membrane	8044094
7.99234	7.51018	8.24498		7.91583		9.71562	8.31622	9.91866		9.31683		17.6988		histone cluster 1, H3h	NM_003536	HIST1H3H	6p22-p21.3	---	8117589
7.97818	7.61839	7.54594		7.71417		9.37476	8.05607	9.80644		9.07909		17.6937		coiled-coil domain containing 125	NM_176816	CCDC125	5q13.2	---	8112439
6.46359	6.26681	6.43265		6.38769		7.2185	7.07535	8.25742		7.51709		17.6809		tubulin tyrosine ligase-like family, member 1	NR_027779	TTLL1	22q13.1	cytoplasm // cytoskeleton // microtubule	8076547
4.96641	4.15504	4.4357		4.51905		5.88095	4.51701	5.55478		5.31758		17.6703		---	---	---	---	---	8154392
6.61845	6.10855	6.8873		6.5381		6.99922	7.65723	8.42209		7.69285		17.6618		C3 and PZP-like, alpha-2-macroglobulin domain containing 8	NM_015692	CPAMD8	19p13.11	extracellular region // extracellular space // membrane	8035201
2.94699	2.89775	2.91277		2.91917		3.2582	3.52102	3.52412		3.43444		17.6514		CTAGE family, member 3	AF338231	CTAGE3	13q14.3	cellular_component	7971727
3.32544	2.56095	2.5055		2.7973		4.02443	2.67744	3.16986		3.29058		17.6343		---	---	---	---	---	8085579
4.38236	4.44661	4.64084		4.48994		6.09468	4.44863	5.30117		5.28149		17.6296		---	---	---	---	---	8175153
5.93673	4.75873	6.07428		5.58992		7.04364	5.58084	7.0981		6.57419		17.6081		similar to hCG1777210	AK092442	PP14571	2q37.3	---	8060101
3.94156	3.35896	3.81174		3.70409		4.85746	3.85357	4.35684		4.35596		17.5987		---	---	---	---	---	8127156
7.14124	6.82543	7.42522		7.13063		8.8562	7.36041	8.93924		8.38528		17.5953		abhydrolase domain containing 11	NR_026912	ABHD11	7q11.23	cellular_component	8140129
6.19484	5.35761	6.36425		5.97223		7.3303	6.48966	7.24799		7.02265		17.5883		family with sequence similarity 151, member B	AY358256	FAM151B	5q14.1	---	8106626
4.91897	4.10837	4.84405		4.6238		5.74078	4.66505	5.90523		5.43702		17.5878		---	---	---	---	---	8100553
4.12161	3.24957	3.81174		3.72764		4.64685	3.85249	4.6494		4.38291		17.5788		popeye domain containing 2	NM_022135	POPDC2	3q13.33	membrane // integral to membrane	8089785
3.01936	2.72946	2.77172		2.84018		3.46672	3.31456	3.23691		3.33939		17.5768		---	---	---	---	---	8168890
3.55884	3.50647	4.27429		3.77986		5.06365	4.24517	4.02264		4.44382		17.5656		---	---	---	---	---	7970804
5.98309	5.55463	5.73827		5.75866		6.4251	5.45494	8.43048		6.77017		17.565		alkaline ceramidase 1	NM_133492	ACER1	19p13.3	Golgi membrane // endoplasmic reticulum // endoplasmic reticulum membrane // membrane // integral to membrane	8033151
6.49583	6.59199	7.20288		6.76357		8.73266	6.78887	8.33292		7.95148		17.5634		zinc finger protein 107	NM_016220	ZNF107	7q11.2	cellular_component // intracellular // nucleus	8133049
5.77339	4.99805	5.45504		5.40883		7.93902	4.70073	6.43471		6.35815		17.5515		Rho-type GTPase-activating protein RICH2	NM_014859	RICH2	17p12	intracellular // cytoplasm	8005064
5.9944	5.02716	6.14731		5.72296		7.46184	5.58053	7.13961		6.72733		17.5498		DnaJ (Hsp40) homolog, subfamily C, member 22	NM_024902	DNAJC22	12q13.12	membrane // integral to membrane	7955211
5.49998	5.08781	5.65483		5.4142		4.537	9.90217	4.6526		6.36392		17.5412		laminin, alpha 4	NM_001105206	LAMA4	6q21	extracellular region // basal lamina // laminin-1 complex	8128991
6.25274	5.72796	6.86272		6.28114		6.2081	9.33954	6.6		7.38255		17.5352		transcription factor CP2-like 1	NM_014553	TFCP2L1	2q14	nucleus // cytoplasm // membrane	8054872
5.83578	5.42593	5.76505		5.67558		9.17828	4.87581	5.95434		6.66948		17.5117		adenylate cyclase 5	NM_183357	ADCY5	3q13.2-q21	membrane // integral to membrane	8090070
3.44202	3.07204	3.05882		3.19096		4.16238	2.89956	4.18694		3.74963		17.5079		dynein, light chain, roadblock-type 2	NM_130897	DYNLRB2	16q23.3	cytoplasm // cytoplasmic dynein complex // microtubule	7997374
6.11383	5.78139	6.11648		6.0039		7.66484	6.64188	6.85806		7.05493		17.5057		---	---	---	---	---	8180315
6.64029	6.13137	6.30571		6.35912		8.01331	6.63448	7.7668		7.47153		17.493		zinc finger protein 785	NM_152458	ZNF785	16p11.2	intracellular // nucleus	8000917
5.59258	5.20959	5.53548		5.44588		6.67144	6.45719	6.06622		6.39828		17.4884		chromosome X open reading frame 42	NR_027131	CXorf42	Xq24	---	8174761
6.00572	6.16995	6.51383		6.22983		7.72063	6.75306	7.48386		7.31918		17.486		PCTAIRE protein kinase 3	NM_212503	PCTK3	1q31-q32	cellular_component	7909104
6.56513	6.31607	7.07019		6.65046		7.62839	6.95956	8.85131		7.81309		17.4819		aldehyde dehydrogenase 4 family, member A1	NM_003748	ALDH4A1	1p36	mitochondrion // mitochondrial matrix	7912975
7.76973	7.90685	8.34144		8.00601		9.49363	8.95815	9.76405		9.40528		17.4778		glycerol-3-phosphate dehydrogenase 1-like	NM_015141	GPD1L	3p22.3	cytoplasm // glycerol-3-phosphate dehydrogenase complex	8078386
4.96641	4.75873	5.37093		5.03202		6.24661	5.42167	6.06622		5.9115		17.4777		carboxylesterase 4-like	NR_003276	CES4	16q12.2	extracellular region // endoplasmic reticulum	7995729
4.51201	3.0361	3.17023		3.57278		4.72062	3.17773	4.69244		4.19693		17.4696		---	---	---	---	---	7969091
7.00286	6.83291	7.27967		7.03848		8.01642	7.02085	9.76156		8.26628		17.4441		single-strand-selective monofunctional uracil-DNA glycosylase 1	NM_014311	SMUG1	12q13.11-q13.3	nucleus // nucleoplasm // nucleolus	7963741
4.12315	4.38449	4.71152		4.40639		5.666	4.35086	5.50581		5.17423		17.4255		chromosome 16 open reading frame 3	NM_001214	C16orf3	16q24.3	cellular_component	8003566
4.22792	4.01633	3.50863		3.91762		4.80782	4.4536	4.53909		4.60017		17.4224		---	---	---	---	---	8074958
5.49998	4.08628	4.55673		4.71433		6.24661	4.57803	5.78152		5.53539		17.4163		SUMO1 pseudogene 3	NR_002190	SUMO1P3	1q22	---	7906574
4.71744	4.95518	5.10372		4.92545		5.08503	6.73962	5.52376		5.7828		17.4066		chitinase 3-like 1 (cartilage glycoprotein-39)	NM_001276	CHI3L1	1q32.1	extracellular region // proteinaceous extracellular matrix // extracellular space	7923547
2.52282	2.33067	2.8414		2.56496		2.76231	2.17864	4.09291		3.01129		17.4007		small nucleolar RNA, C/D box 116-13	NR_003328	SNORD116-13	15q11.2	---	7981974
6.04994	5.70048	6.00858		5.91966		6.84462	7.27485	6.728		6.94916		17.3911		protein phosphatase 1, regulatory (inhibitor) subunit 1B	NM_032192	PPP1R1B	17q12	cytoplasm	8006865
7.29218	6.7549	7.48191		7.17633		7.90043	9.04834	8.32412		8.4243		17.3901		GRB2-associated binding protein 2	NM_080491	GAB2	11q14.1	---	7950671
6.31678	6.22679	6.90545		6.48301		7.45697	6.92317	8.4469		7.60901		17.3686		aarF domain containing kinase 4	NM_024876	ADCK4	19q13.2	membrane // integral to membrane	8036938
7.17247	6.64388	7.44611		7.08748		8.61077	7.90004	8.44297		8.31793		17.3608		KIAA1522	NM_020888	KIAA1522	1p35.1	---	7899821
3.32526	2.72946	3.50863		3.18778		4.09614	3.31456	3.8127		3.74113		17.3584		insulin-like 5	NM_005478	INSL5	1p31.1-p22.3	extracellular region	7916785
3.79073	3.65398	4.24099		3.89523		4.47822	3.59002	5.64403		4.57076		17.3425		nuclear RNA export factor 2	NM_017809	NXF2	Xq22.1	---	8168900
7.93165	8.00274	8.00325		7.97921		9.27824	8.99235	9.81756		9.36271		17.3388		coenzyme Q5 homolog, methyltransferase (S. cerevisiae)	NM_032314	COQ5	12q24.31	mitochondrion	7967072
2.8715	2.41788	2.8414		2.71026		3.05282	3.03608	3.45158		3.18016		17.3378		---	---	---	---	---	8175332
3.40304	3.50626	3.88612		3.59847		3.67909	3.12869	5.85813		4.22197		17.3267		chromosome 1 open reading frame 125	NM_144696	C1orf125	1q25.2	---	7907719
8.03478	8.04389	8.33928		8.13932		9.80197	8.74337	10.1018		9.54905		17.32		AT rich interactive domain 2 (ARID, RFX-like)	NM_152641	ARID2	12q12	intracellular // nucleus	7955019
4.29553	3.07029	4.30759		3.89114		4.16294	4.17436	5.35779		4.56503		17.3187		---	---	---	---	---	8049197
4.08769	3.35896	3.81174		3.7528		3.95965	4.3877	4.8606		4.40265		17.3165		coiled-coil domain containing 30	NM_001080850	CCDC30	1p34.2	---	7900555
3.63668	3.32241	3.6229		3.52733		4.22863	3.76659	4.41915		4.13812		17.3161		ATPase, class I, type 8B, member 4	NM_024837	ATP8B4	15q21.2	membrane // integral to membrane	7988644
4.29553	4.28851	5.10372		4.56259		6.06459	4.94785	5.04521		5.35255		17.314		v-ets erythroblastosis virus E26 oncogene homolog (avian)	NM_001136154	ERG	21q22.3	nucleus	8070297
4.87153	4.28851	4.17277		4.44427		5.69852	4.69334	5.24823		5.21336		17.3052		---	---	---	---	---	7899882
6.29009	6.20948	6.54507		6.34821		8.1443	6.35514	7.83924		7.44623		17.2964		---	---	---	---	---	8102350
5.4968	4.40308	5.10372		5.0012		5.42356	4.7469	7.4261		5.86552		17.2822		creatine kinase, mitochondrial 2 (sarcomeric)	NM_001825	CKMT2	5q13.3	mitochondrion // mitochondrial inner membrane // membrane	8106689
4.54772	3.50626	3.35633		3.80343		4.70409	3.59002	5.0881		4.46074		17.2818		---	---	---	---	---	7952984
4.0153	3.94532	4.30759		4.0894		6.16854	3.67961	4.53909		4.79574		17.2724		POTE ankyrin domain family, member B	NM_207355	POTEB	15q11.2	---	7986605
2.95312	2.73006	2.70887		2.79735		3.36415	3.13222	3.34518		3.28052		17.2724		---	---	---	---	---	7965224
6.00572	5.585	5.56626		5.71899		8.12893	5.66855	6.32204		6.7065		17.2672		chromosome 20 open reading frame 112	NM_080616	C20orf112	20q11.1-q11.23	---	8065612
5.23846	5.14309	5.24033		5.20729		6.80502	3.59002	7.92052		6.10519		17.243		sema domain, transmembrane domain (TM), and cytoplasmic domain, (semaphorin) 6A	NM_020796	SEMA6A	5q23.1	membrane // integral to membrane // axon	8113666
3.92117	4.01423	3.62206		3.85249		4.71645	4.41308	4.4196		4.51638		17.2327		---	---	---	---	---	8048723
8.10462	8.24793	8.60874		8.32043		10.1343	9.45093	9.67597		9.75375		17.2264		bromodomain and WD repeat domain containing 1	NM_033656	BRWD1	21q22.2	nucleus // cytoplasm	8070341
3.86614	2.96543	3.77352		3.53503		4.22618	3.97819	4.22714		4.14383		17.222		albumin	NM_000477	ALB	4q11-q13	extracellular region // extracellular region // extracellular space // platelet alpha granule lumen // protein complex	8095628
5.21936	3.87342	4.92593		4.67291		5.69852	4.85127	5.88279		5.47752		17.2188		peptidylprolyl isomerase E pseudogene	AK093659	LOC728448	1p34.3	---	7915204
6.56924	7.57647	8.36945		7.50505		12.9457	5.97341	7.47167		8.79692		17.2132		trefoil factor 1	NM_003225	TFF1	21q22.3	extracellular region	8070579
5.95991	5.48875	5.97343		5.80736		8.06229	6.44029	5.91778		6.80679		17.2096		nuclear receptor subfamily 4, group A, member 2	NM_006186	NR4A2	2q22-q23	nucleus	8055952
5.69029	5.82735	5.99729		5.83831		8.33374	5.56561	6.62915		6.84283		17.2057		Meis homeobox 1	NM_002398	MEIS1	2p14-p13	nucleus	8042356
5.27617	5.2836	5.31665		5.29214		5.99685	4.74402	7.86612		6.20233		17.1989		POU class 6 homeobox 2	NM_007252	POU6F2	7p14-p13	nucleus	8132387
6.25274	5.95423	6.3288		6.17859		7.67194	6.64188	7.40944		7.24109		17.1964		melanoma antigen family H, 1	NM_014061	MAGEH1	Xp11.21	---	8167887
6.50756	4.81987	5.81351		5.71365		6.99302	5.88279	7.21228		6.69603		17.1937		ribosomal protein SA pseudogene 58	NR_003662	RPSAP58	19p12	---	8027354
4.82181	4.22249	4.97239		4.67223		6.26549	4.51701	5.64403		5.47551		17.1927		leucine rich repeat transmembrane neuronal 3	NM_178011	LRRTM3	10q21.3	membrane // integral to membrane	7927803
7.23126	6.08749	6.92341		6.74739		8.2897	7.5612	7.8704		7.9071		17.1876		Dexi homolog (mouse)	NM_014015	DEXI	16p13.13	---	7999419
3.32526	2.86257	2.98414		3.05732		3.46672	4.3877	2.89327		3.58256		17.1797		hypothetical protein FLJ35848	AK302001	FLJ35848	17q21.31	---	8007643
6.2144	5.93077	6.13713		6.0941		6.53808	7.5612	7.32198		7.14042		17.1694		FERM domain containing 4B	NM_015123	FRMD4B	3p14.1	cytoplasm // cytoskeleton	8088745
5.63609	5.37499	5.75166		5.58758		6.79328	6.19534	6.65112		6.54658		17.1631		zinc finger, CW type with PWWP domain 1	NM_017984	ZCWPW1	7q22.1	---	8141498
7.57935	7.33093	7.52655		7.47894		8.96558	8.30772	9.01404		8.76245		17.1616		zinc finger, DHHC-type containing 21	NM_178566	ZDHHC21	9p22.3	membrane // integral to membrane	8160151
7.12158	6.32195	7.15362		6.86572		7.39172	8.55022	8.18985		8.04393		17.1609		small Cajal body-specific RNA 9-like (retrotransposed)	NR_023358	SCARNA9L	Xp22.12	---	8171758
8.77891	8.38371	8.85606		8.67289		10.6608	9.59593	10.2228		10.1599		17.1449		RAB, member RAS oncogene family-like 5	NM_022777	RABL5	7q22.1	---	8141728
3.78434	3.61692	3.39462		3.59863		4.68521	3.93626	4.02457		4.21535		17.1376		---	---	---	---	---	8174646
3.01936	2.79544	3.2054		3.00673		3.82024	3.22162	3.52387		3.52191		17.1341		---	---	---	---	---	8036416
6.40458	5.80647	6.01086		6.07397		7.35253	5.78938	8.20214		7.11468		17.1339		small proline-rich protein 1A	NM_005987	SPRR1A	1q21-q22	cornified envelope // cytoplasm	7905544
7.19112	7.10668	7.7168		7.3382		8.19421	9.39822	8.19185		8.59476		17.1235		SMAD family member 1	NM_005900	SMAD1	4q31	intracellular // nucleus // nucleoplasm // transcription factor complex // cytoplasm // cytosol // integral to membrane	8097657
6.29925	5.94212	6.85022		6.36386		7.74968	6.79795	7.81209		7.45324		17.1182		pleckstrin homology domain containing, family H (with MyTH4 domain) member 1	NM_020715	PLEKHH1	14q24.1	cytoskeleton	7975238
7.98444	7.17992	7.56515		7.57651		8.9627	7.99923	9.65822		8.87338		17.1171		centrosomal protein 70kDa	NM_024491	CEP70	3q22-q23	centrosome	8090988
3.48097	3.07204	4.10883		3.55395		3.88301	4.23044	4.37303		4.16216		17.1139		chromosome 22 open reading frame 43	CR456370	C22orf43	22q11.2	---	8074916
7.20203	6.99719	7.32223		7.17382		9.79582	8.94941	6.45804		8.40109		17.1077		early growth response 1	NM_001964	EGR1	5q31.1	intracellular // nucleus	8108370
5.53151	4.90828	5.91604		5.45194		6.92992	6.97571	5.24823		6.38462		17.1072		glycogenin 2	NM_001079855	GYG2	Xp22.3	soluble fraction // cytosol	8165817
4.22032	3.90937	4.26937		4.13302		4.97124	4.71306	4.83576		4.84002		17.1061		IFMQ9370	AY358254	UNQ9370	15q26.1	---	7986291
5.11906	3.79965	5.03935		4.65269		5.55115	5.14057	5.65264		5.44812		17.0962		---	---	---	---	---	8035234
7.8959	6.84948	7.28173		7.34237		9.12781	8.3951	8.26937		8.59743		17.0934		zinc finger protein 362	NM_152493	ZNF362	1p35.1	intracellular // nucleus	7899870
4.12315	3.1414	3.69877		3.65444		4.05943	4.01769	4.75893		4.27868		17.0818		similar to hCG2002332	ENST00000438484	LOC100131112	8p23.1	---	8149084
4.60611	4.01633	4.87803		4.50016		5.64185	4.99384	5.17034		5.26868		17.0777		chromosome 10 open reading frame 27	NM_152710	C10orf27	10q22.1	cytoplasm // cytosol	7934166
4.25998	2.96543	3.16883		3.46474		3.4673	3.96387	4.73808		4.05642		17.077		---	---	---	---	---	8152595
4.48653	3.83645	4.72158		4.34819		5.80534	4.19552	5.26696		5.08927		17.0435		solute carrier family 24 (sodium/potassium/calcium exchanger), member 2	NM_020344	SLC24A2	9p22-p13	membrane // integral to membrane	8160321
3.79073	3.80079	3.73661		3.77604		4.80782	3.59002	4.8606		4.41948		17.0401		hypothetical LOC100132319	AF315716	LOC100132319	3q28	---	8092702
4.87153	3.65398	4.4357		4.3204		5.90522	4.4536	4.81091		5.05658		17.0395		---	---	---	---	---	8180226
6.65425	6.8437	7.59499		7.03098		8.0764	7.79316	8.81649		8.22869		17.0347		cytochrome b5 domain containing 1	NM_144607	CYB5D1	17p13.1	---	8004694
7.4533	7.37505	7.62484		7.4844		8.48354	8.63613	9.15736		8.75901		17.0302		tankyrase, TRF1-interacting ankyrin-related ADP-ribose polymerase	NM_003747	TNKS	8p23.1	pericentriolar material // nuclear chromosome, telomeric region // nucleus // nuclear pore // chromosome // cytoplasm // microsome // Golgi apparatus // membrane // nuclear membrane	8144528
6.932	6.84195	6.43178		6.73524		11.2795	9.23234	3.13167		7.88116		17.0137		latexin	NM_020169	LXN	3q25.32	cytoplasm	8091715
7.87193	7.36633	8.11052		7.78293		9.95845	8.56934	8.79118		9.10632		17.0038		RNA terminal phosphate cyclase-like 1	NM_005772	RCL1	9p24.1-p23	nucleus // nucleolus	8154163
4.66268	4.41514	4.94066		4.67283		4.88156	5.62529	5.89492		5.46725		17.001		CTAGE family, member 6	NM_178561	CTAGE6	7q35	cellular_component	8143601
5.40102	4.08628	5.33564		4.94098		6.12785	4.31923	6.89489		5.78066		16.9942		zinc finger protein 556	NM_024967	ZNF556	19p13.3	intracellular // nucleus	8024527
8.54014	7.983	8.59761		8.37359		10.7498	8.91547	9.72282		9.79603		16.9873		mitogen-activated protein kinase 3	NM_001040056	MAPK3	16p11.2	cellular_component // nucleus // nucleoplasm // nucleolus // cytosol // cytoskeleton	8000811
6.6997	6.2918	6.12681		6.37277		7.9786	7.58012	6.80692		7.45521		16.9855		inhibitor of DNA binding 4, dominant negative helix-loop-helix protein	NM_001546	ID4	6p22-p21	nucleus // nucleus	8117120
7.22163	6.47576	7.55752		7.08497		8.2476	8.02715	8.58498		8.28658		16.96		glucosidase, alpha; acid	NM_000152	GAA	17q25.2-q25.3	lysosome	8010354
6.11383	5.20959	6.27392		5.86578		7.0973	7.19833	6.28552		6.86038		16.956		B-cell CLL/lymphoma 11B (zinc finger protein)	NM_138576	BCL11B	14q32.2	intracellular // nucleus	7981242
6.47949	6.12399	6.54474		6.38274		8.18179	6.84937	7.36194		7.46437		16.9462		heat shock 70kDa protein 2	NM_021979	HSPA2	14q24.1	mitochondrion // cell surface	7975076
6.4635	6.45064	6.60558		6.50657		7.71244	7.03175	8.07899		7.60773		16.9237		hypothetical LOC642477	AK096951	FLJ39632	14q11.2	---	7973002
3.71401	3.43248	3.66093		3.60247		4.22863	2.76304	5.64403		4.2119		16.917		UDP glucuronosyltransferase 2 family, polypeptide B15	NM_001076	UGT2B15	4q13	endoplasmic reticulum // microsome // membrane // integral to membrane	8100737
3.71401	3.43248	3.66093		3.60247		4.22863	2.76304	5.64403		4.2119		16.917		UDP glucuronosyltransferase 2 family, polypeptide B15	NM_001076	UGT2B15	4q13	endoplasmic reticulum // microsome // membrane // integral to membrane	8100746
7.35979	7.79443	7.74404		7.63275		9.06051	8.22334	9.48785		8.9239		16.9159		TBC1 domain containing kinase	NM_033115	TBCK	4q24	intracellular	8102171
8.24666	8.22157	8.9267		8.46498		9.9577	8.85909	10.8735		9.89675		16.914		spinster homolog 1 (Drosophila)	NM_032038	SPNS1	16p11.2	mitochondrion // mitochondrial inner membrane // membrane // integral to membrane	7994518
5.60738	5.64361	5.42141		5.55746		6.53833	4.22279	8.73046		6.49719		16.9093		---	---	---	---	---	8100310
4.38782	3.35896	3.73549		3.82743		4.96347	3.81056	4.6494		4.47448		16.9057		---	---	---	---	---	7939005
4.39334	3.21363	4.16976		3.92558		5.56381	3.85249	4.35016		4.58882		16.8955		chromosome 13 open reading frame 35	NM_207440	C13orf35	13q34	---	7970158
4.82181	4.85995	4.67062		4.78413		5.80557	4.99384	5.97742		5.59227		16.8923		hypothetical protein FLJ25715	AK098581	FLJ25715	18q23	---	8023910
3.62668	3.89275	3.81025		3.77656		4.47151	4.17436	4.59665		4.41417		16.8834		---	---	---	---	---	8128886
5.86429	5.93077	6.52954		6.1082		7.47517	6.9642	6.97735		7.13891		16.8742		zinc finger protein 433	NM_001080411	ZNF433	19p13.2	intracellular // nucleus	8034320
6.47985	6.44297	6.95863		6.62715		7.15917	6.92912	9.14722		7.74517		16.8703		chromosome 10 open reading frame 116	NM_006829	C10orf116	10q23.2	cellular_component	7928882
7.07953	7.34874	7.51082		7.31303		8.36602	7.65007	9.62206		8.54605		16.8606		transmembrane protein 135	NM_022918	TMEM135	11q14.2	membrane // integral to membrane	7942964
3.14011	3.25547	3.81137		3.40232		3.43361	4.54518	3.94823		3.97567		16.8519		lipase, family member K	NM_001080518	LIPK	10q23.31	extracellular region	7928994
2.65839	2.72946	2.57011		2.65266		3.18812	2.9441	3.1665		3.09957		16.8479		---	---	---	---	---	8023755
6.57371	5.78139	6.92341		6.42617		6.47461	6.48966	9.56225		7.50884		16.8478		arsenic (+3 oxidation state) methyltransferase	NM_020682	AS3MT	10q24.32	soluble fraction // cytoplasm // cytosol	7930181
3.84928	4.66814	4.93846		4.48529		5.01242	4.85042	5.85877		5.24054		16.8382		---	---	---	---	---	8113936
3.40304	3.07029	3.35633		3.27655		3.5374	3.85357	4.09346		3.82814		16.8346		---	---	---	---	---	8104723
3.71279	2.89988	3.54666		3.38644		4.24832	3.45229	4.16875		3.95646		16.8322		---	---	---	---	---	7917180
6.57371	6.44297	6.93524		6.65064		7.80045	7.17855	8.33094		7.76998		16.8306		RAB, member of RAS oncogene family-like 4	NM_006860	RABL4	22q13.1	---	8075828
7.57775	6.94496	7.49935		7.34069		9.59341	7.19669	8.93663		8.57557		16.8225		chromosome 16 open reading frame 75	NM_152308	C16orf75	16p13.13	nucleus	7993248
7.44505	7.85176	7.73051		7.67577		9.64913	8.08674	9.16492		8.96693		16.8212		prune homolog (Drosophila)	NM_021222	PRUNE	1q21	nucleus // cytoplasm // focal adhesion // cell junction	7905299
2.94491	3.28585	3.50863		3.24646		4.29308	3.12869	3.95472		3.79216		16.8091		sarcoma antigen 1	NM_018666	SAGE1	Xq26	---	8170076
6.33544	5.79439	6.67059		6.26681		6.76672	6.9927	8.19949		7.31964		16.8001		absent in melanoma 1-like	NM_001039775	AIM1L	1p36.11	---	7913938
4.98905	4.75554	5.0788		4.94113		5.65616	4.478	7.17873		5.77096		16.7944		guanylate cyclase 1, soluble, alpha 2	NM_000855	GUCY1A2	11q21-q22	cytoplasm	7951437
6.98019	6.18985	7.22286		6.79763		7.55406	8.37879	7.88268		7.93851		16.7834		ubiquitin specific peptidase 18	NM_017414	USP18	22q11.21	nucleus	8071155
9.05992	9.115	9.4906		9.22184		11.2903	10.3572	10.6594		10.769		16.7767		tryptophan rich basic protein	NM_004627	WRB	21q22.3	nucleus // nucleolus // membrane // integral to membrane	8068612
4.54772	4.22249	4.72495		4.49839		6.5688	4.01894	5.17034		5.25269		16.7684		chromosome 21 open reading frame 88	NR_026543	C21orf88	21q22.2	---	8070411
5.40102	4.59485	5.6259		5.20726		6.12785	5.66855	6.44304		6.07982		16.7566		beta-1,4-N-acetyl-galactosaminyl transferase 2	NM_153446	B4GALNT2	17q21.32	microsome // Golgi apparatus // membrane // integral to membrane // integral to Golgi membrane	8008172
3.67028	3.94353	4.87803		4.16395		4.36164	6.79911	3.424		4.86158		16.7543		aldo-keto reductase family 1, member B10 (aldose reductase)	NM_020299	AKR1B10	7q33	cellular_component // cytoplasm	8136336
5.25559	4.70574	4.52692		4.82942		5.04148	5.82942	6.04453		5.63848		16.7527		hypothetical protein LOC100127980	AK090827	LOC100127980	19q13.12	---	8036302
4.08769	3.28585	4.03194		3.80183		4.537	4.01894	4.75971		4.43855		16.7477		---	---	---	---	---	8171800
6.80243	6.40902	6.98154		6.731		7.87275	7.57933	8.11729		7.85646		16.7205		GTPase activating Rap/RanGAP domain-like 4	NM_015085	GARNL4	17p13.3	intracellular // cytoplasm // perinuclear region of cytoplasm	8003773
5.09832	4.01633	5.43902		4.85122		6.71329	4.31923	5.95434		5.66229		16.7188		---	---	---	---	---	8128624
5.29478	4.59485	6.15748		5.34904		6.90606	5.08165	6.74155		6.24309		16.7142		---	---	---	---	---	7979982
6.52754	5.39237	6.21688		6.0456		7.26614	6.79264	7.10859		7.05579		16.7095		RAB7A, member RAS oncogene family	NM_004637	RAB7A	3q21.3	cytoplasm // lysosome // late endosome // Golgi apparatus // cytoplasmic vesicle // melanosome // phagocytic vesicle	8090509
7.44217	6.86355	7.51433		7.27335		9.31714	7.80952	8.33833		8.48833		16.7045		poly (ADP-ribose) polymerase family, member 16	NM_017851	PARP16	15q22.31	nucleus // membrane // integral to membrane	7989759
5.75884	5.14646	6.06854		5.65795		7.67526	7.74372	4.38799		6.60232		16.6912		hypothetical LOC648987	ENST00000314957	LOC648987	5p12	---	8111922
6.27154	6.04442	6.41585		6.24394		6.95339	7.5381	7.36638		7.28595		16.6884		homeobox C12	NM_173860	HOXC12	12q12-q13	nucleus	7955852
6.028	5.4919	6.00858		5.84282		7.25673	7.12787	6.06622		6.81694		16.672		neuroblastoma breakpoint family, member 6	NM_001143987	NBPF6	1p13.3	cytoplasm	7903490
6.43013	6.39784	6.63374		6.48724		8.67319	6.71131	7.32187		7.56879		16.672		solute carrier family 2 (facilitated glucose transporter), member 10	NM_030777	SLC2A10	20q13.1	cytoplasm // membrane // integral to membrane // perinuclear region of cytoplasm	8063177
4.71766	3.54323	4.59281		4.28457		5.55213	4.13616	5.30783		4.99871		16.6677		divergent-paired related homeobox	NM_001012728	DPRX	19q13.42	nucleus	8031013
3.24784	3.21329	2.98414		3.14843		3.82024	3.31456	3.88405		3.67295		16.6598		---	---	---	---	---	7958209
3.63647	3.24957	3.73549		3.54051		4.25704	3.84928	4.28183		4.12938		16.6323		---	---	---	---	---	7956419
6.11791	5.67135	5.99516		5.92814		7.40062	5.8292	7.51136		6.91373		16.6255		RAB6B, member RAS oncogene family	NM_016577	RAB6B	3q22.1	Golgi apparatus // membrane	8090803
3.55626	3.43261	3.99226		3.66037		4.79188	3.63482	4.37895		4.26855		16.6151		amelogenin (amelogenesis imperfecta 1, X-linked)	NM_182680	AMELX	Xp22.31-p22.1	extracellular region // proteinaceous extracellular matrix // nucleus // extracellular matrix part	8166006
7.15233	6.87038	7.73729		7.25333		8.66864	7.72016	8.98586		8.45822		16.6115		stromal antigen 3-like 4	NM_022906	STAG3L4	7p11.2-q11.2	transverse filament // male germ cell nucleus // meiotic cohesin complex	8133215
4.08769	3.00006	3.95958		3.68244		4.75671	3.76755	4.35684		4.2937		16.5992		---	---	---	---	---	7922868
6.58847	6.31788	6.95695		6.6211		7.99392	7.10184	8.063		7.71959		16.5907		single immunoglobulin and toll-interleukin 1 receptor (TIR) domain	NM_001135053	SIGIRR	11p15.5	membrane // integral to membrane	7945377
2.94491	3.07029	3.35633		3.12384		4.537	3.22162	3.1665		3.6417		16.5778		---	---	---	---	---	7925444
4.08695	3.17735	3.35898		3.54109		3.64348	3.58935	5.15006		4.12763		16.5638		GLI pathogenesis-related 1 like 2	NM_152436	GLIPR1L2	12q21.2	extracellular region // membrane // integral to membrane	7957253
8.15104	7.76819	7.90317		7.9408		9.40073	8.42149	9.94252		9.25491		16.5489		coiled-coil domain containing 125	NM_176816	CCDC125	5q13.2	---	8177628
4.48747	4.22249	4.4357		4.38188		4.90566	4.80047	5.61489		5.10701		16.5482		---	---	---	---	---	8155081
6.13436	5.71422	6.681		6.17653		8.0764	6.37097	7.14838		7.19859		16.5475		zinc finger protein 48	NM_152652	ZNF48	16p11.2	intracellular // nucleus	7994813
7.96725	7.33986	7.68216		7.66309		10.0195	7.59889	9.17494		8.93111		16.5471		zinc finger protein 652	NM_014897	ZNF652	17q21.32-q21.33	intracellular // nucleus	8016546
6.52754	6.64388	7.23248		6.8013		9.23345	6.81843	7.72796		7.92662		16.5456		aminopeptidase-like 1	NM_024663	NPEPL1	20q13.32	intracellular	8063650
7.03936	6.55461	6.82482		6.80626		8.4621	7.34006	7.99438		7.93218		16.5423		chromosome 2 open reading frame 55	NM_207362	C2orf55	2q11.2	---	8054154
5.29478	4.75873	5.81715		5.29022		5.85626	7.0538	5.58515		6.16507		16.537		methionine adenosyltransferase I, alpha	NM_000429	MAT1A	10q22	---	7934755
5.76166	5.04425	5.65454		5.48682		7.3417	5.81662	6.02404		6.39412		16.5361		interferon regulatory factor 5	NM_002200	IRF5	7q32	nucleus	8136045
4.29553	3.72758	3.73661		3.91991		4.64994	4.09795	4.95564		4.56784		16.5293		chromosome 15 open reading frame 33	NM_152647	C15orf33	15q21.2	---	7988625
4.66268	4.01633	4.37252		4.35051		5.83113	4.51701	4.8606		5.06958		16.5286		---	---	---	---	---	8174554
3.17096	3.1414	3.58487		3.29907		4.29308	3.4991	3.74085		3.84435		16.528		---	---	---	---	---	8168422
6.69095	6.83424	6.86857		6.79792		8.48946	6.55216	8.72237		7.92133		16.5258		chromosome 6 open reading frame 141	NM_001145652	C6orf141	6p12.3	---	8120176
5.67519	4.85995	5.76407		5.43307		7.10685	5.24222	6.64366		6.33091		16.5255		kinase suppressor of ras 2	NM_173598	KSR2	12q24.22-q24.23	cytoplasm // membrane	7966810
3.67483	3.35896	4.32017		3.78465		4.78227	3.70625	4.7405		4.40967		16.5145		---	---	---	---	---	7906948
3.48099	3.17735	4.63215		3.76349		5.09893	4.13616	3.91938		4.38482		16.5094		interferon, alpha 8	NM_002170	IFNA8	9p22	extracellular region // extracellular space	8154622
6.34122	5.52224	6.28318		6.04888		7.19306	7.39466	6.55468		7.04747		16.5086		transglutaminase 1 (K polypeptide epidermal type I, protein-glutamine-gamma-glutamyltransferase)	NM_000359	TGM1	14q11.2	cornified envelope // cell-cell adherens junction // membrane // intrinsic to membrane	7978222
2.72818	2.86257	3.2054		2.93205		4.22863	2.853	3.1665		3.41604		16.5071		---	---	---	---	---	8092748
4.36135	4.22249	5.26237		4.6154		4.95247	3.76755	7.40944		5.37649		16.4901		synovial sarcoma, X breakpoint 4	NM_005636	SSX4	Xp11.23	---	8167261
4.89562	6.04376	6.10601		5.6818		7.17546	7.65679	5.02187		6.61804		16.4779		HECT, C2 and WW domain containing E3 ubiquitin protein ligase 2	NM_020760	HECW2	2q32.3-q33.1	intracellular // cytoplasm	8057898
5.11198	5.55431	5.8423		5.50286		6.93455	6.20665	6.08759		6.4096		16.4775		helicase (DNA) B	NM_033647	HELB	12q14.3	alpha DNA polymerase:primase complex	7956894
7.19233	7.07683	7.57275		7.28064		9.17725	6.99846	9.26211		8.47927		16.4633		PAN2 poly(A) specific ribonuclease subunit homolog (S. cerevisiae)	NM_014871	PAN2	12q13.2-q13.3	intracellular // nucleus // cytoplasm	7964089
3.17096	3.00006	3.2054		3.12547		3.39633	3.4991	4.02457		3.64		16.4625		---	---	---	---	---	8091627
8.49909	7.99867	8.16052		8.21943		10.1906	9.50855	9.0172		9.57211		16.4572		tropomyosin 1 (alpha)	NM_000366	TPM1	15q22.1	stress fiber // cytoplasm // cytoskeleton // muscle thin filament tropomyosin // sarcomere // bleb // ruffle membrane	7984079
6.1549	6.08687	6.68442		6.30873		7.7116	6.98426	7.34429		7.34672		16.4532		platelet-derived growth factor beta polypeptide (simian sarcoma viral (v-sis) oncogene homolog)	NM_002608	PDGFB	22q12.3-q13.1|22q13.1	extracellular region // extracellular region // cytoplasm // cell surface // membrane // platelet dense granule lumen	8076195
9.79158	9.44087	10.311		9.84783		11.6768	11.5405	11.1849		11.4674		16.4461		protein tyrosine phosphatase-like (proline instead of catalytic arginine), member b	NM_198402	PTPLB	3q21.1	endoplasmic reticulum // membrane // integral to membrane	8090091
6.09284	5.17011	6.11648		5.79314		7.19899	6.75306	6.28552		6.74585		16.4455		N-terminal EF-hand calcium binding protein 2	NM_019065	NECAB2	16q23.3	cytoplasm	7997542
7.32081	6.93056	7.67792		7.30976		8.07882	8.30512	9.14711		8.51035		16.4244		MIF4G domain containing	NM_020679	MIF4GD	17q25.1	nucleus // cytoplasm	8018343
5.09832	3.21329	3.95958		4.0904		5.2454	4.74787	4.29303		4.7621		16.4215		---	---	---	---	---	7971165
4.01463	3.46955	3.3565		3.61356		3.5374	4.17304	4.90883		4.20642		16.4066		forkhead box P2	NM_148898	FOXP2	7q31	intracellular // nucleus	8135544
7.35538	6.89483	7.23727		7.16249		7.87184	8.84465	8.29465		8.33705		16.3987		proline rich Gla (G-carboxyglutamic acid) 4 (transmembrane)	NM_024081	PRRG4	11p13	extracellular region // Golgi apparatus // membrane // integral to membrane	7939150
6.53179	6.46484	7.21619		6.7376		8.52707	7.23681	7.76323		7.84237		16.397		tigger transposable element derived 1	NM_145702	TIGD1	2q37.1	chromosome, centromeric region // nucleus	8059770
6.5919	5.42593	6.01935		6.01239		6.73648	7.01398	7.24039		6.99695		16.3754		potassium voltage-gated channel, subfamily G, member 1	NM_002237	KCNG1	20q13	voltage-gated potassium channel complex // membrane // integral to membrane	8067029
4.82181	5.52361	5.96305		5.43615		6.44179	5.77776	6.75497		6.32484		16.3477		WD repeat domain 52	NM_018338	WDR52	3q13.2	---	8089606
2.8715	2.79544	3.50863		3.05852		3.60824	2.58732	4.47991		3.55849		16.3467		---	---	---	---	---	8014142
8.90418	8.64021	8.78857		8.77765		10.7194	9.85541	10.06		10.2116		16.3363		adaptor-related protein complex 3, sigma 2 subunit	NR_023361	AP3S2	15q26.1	Golgi apparatus // membrane // membrane coat // cytoplasmic vesicle	7991357
5.76166	4.15504	5.29947		5.07206		6.24661	5.45494	6.00014		5.90056		16.3347		---	---	---	---	---	8116346
4.15781	3.39572	3.84893		3.80082		5.666	3.67961	3.91938		4.42166		16.3345		chromosome 8 open reading frame 45	NM_001136161	C8orf45	8q13.1	---	8146738
4.82181	4.22249	5.10372		4.71601		6.33861	4.69334	5.42648		5.48614		16.3303		---	---	---	---	---	7901858
6.71773	6.68652	7.16372		6.85599		8.37474	8.13885	7.40944		7.97434		16.3121		SH3 domain binding glutamic acid-rich protein like 2	NM_031469	SH3BGRL2	6q13-q15	nucleus	8120833
4.06207	4.20516	5.50369		4.59031		5.81674	5.10264	5.09725		5.33888		16.3076		tubulin, beta 8	NM_177987	RP11-631M21.2	10p15.3	microtubule // protein complex	7931674
8.0486	6.85585	7.40875		7.43773		9.84989	7.18507	8.91552		8.65016		16.3011		glucocorticoid induced transcript 1	NM_138426	GLCCI1	7p21.3	---	8131496
4.96359	4.28851	5.14276		4.79829		5.09428	5.93116	5.7154		5.58028		16.2973		chemokine (C-X-C motif) ligand 17	NM_198477	CXCL17	19q13.2	extracellular region	8037197
7.72204	7.7549	7.40351		7.62681		9.94107	7.60123	9.06473		8.86901		16.2872		musashi homolog 2 (Drosophila)	NM_138962	MSI2	17q22	cytoplasm	8008682
4.48653	3.17735	4.58387		4.08258		4.09614	5.60582	4.53909		4.74702		16.2749		dual adaptor of phosphotyrosine and 3-phosphoinositides	NM_014395	DAPP1	4q25-q27	cellular_component // cytoplasm // membrane	8096602
6.95715	6.50782	7.03762		6.8342		8.55048	7.15849	8.12931		7.94609		16.2696		cryptochrome 2 (photolyase-like)	NM_021117	CRY2	11p11.2	nucleus // cytoplasm	7939595
6.36862	5.79439	6.12651		6.09651		7.74075	6.72599	6.79444		7.08706		16.2478		chromosome 10 open reading frame 140	NM_207371	C10orf140	10p12.31	nucleus	7932498
4.36135	4.08628	4.77759		4.40841		5.85626	4.3877	5.12979		5.12458		16.2457		hypothetical protein MGC15705	ENST00000425084	MGC15705	22q12.2	---	8072484
3.9041	2.96543	3.54675		3.47209		4.86181	3.40582	3.84032		4.03598		16.2407		---	---	---	---	---	8067860
4.08769	3.28585	3.05704		3.47686		5.2454	3.4991	3.37957		4.04136		16.2358		---	---	---	---	---	7996252
7.89029	7.59247	7.89713		7.7933		9.85943	8.28014	9.03619		9.05858		16.2356		MKL/myocardin-like 2	NM_014048	MKL2	16p13.12	nucleus	7993310
6.12417	5.5634	6.13654		5.94137		6.43835	4.99985	9.27962		6.90594		16.2348		dynein, axonemal, light intermediate chain 1	NM_003462	DNALI1	1p35.1	axonemal dynein complex // axoneme	7900159
7.63847	6.55461	7.69614		7.29641		8.87323	7.39971	9.16994		8.48096		16.2348		Tctex1 domain containing 2	NM_152773	TCTEX1D2	3q29	---	8093096
9.1118	8.99436	9.38237		9.16284		10.0913	9.61077	12.247		10.6497		16.2272		programmed cell death 4 (neoplastic transformation inhibitor)	NM_145341	PDCD4	10q24	nucleus // nucleus // cytoplasm // cytosol	7930454
4.36135	3.21329	4.24099		3.93854		5.67046	3.76755	4.29303		4.57702		16.2109		---	---	---	---	---	7981333
4.60611	3.35896	4.87803		4.28103		5.42395	5.08165	4.41915		4.97492		16.2083		---	---	---	---	---	8078448
7.36416	7.96241	8.15631		7.82763		9.5543	8.1639	9.57013		9.09611		16.2051		tudor and KH domain containing	NM_001083965	TDRKH	1q21	---	7920057
3.40304	4.01633	4.97239		4.13059		5.16738	4.69334	4.53909		4.79994		16.2047		---	---	---	---	---	8005102
2.65839	3.21329	2.91223		2.92797		4.09614	2.58732	3.52387		3.40244		16.2047		---	---	---	---	---	8174199
9.30892	9.12671	8.83093		9.08885		11.2443	9.48555	10.9549		10.5616		16.2039		histone cluster 1, H4h	NM_003543	HIST1H4H	6p21.3	---	8124448
7.02451	6.83285	7.64278		7.16671		8.2966	8.72232	7.96286		8.32726		16.1935		Myb-like, SWIRM and MPN domains 1	NM_001085487	MYSM1	1p32.1	nucleus // chromatin remodeling complex	7916592
4.01463	4.11941	4.33494		4.15632		5.22312	3.80852	5.45521		4.82895		16.1832		---	---	---	---	---	8122816
6.98653	5.35376	7.22024		6.52017		8.75131	6.15035	7.82338		7.57501		16.178		---	---	---	---	---	8054354
6.11383	5.39237	6.21688		5.90769		7.04364	6.45719	7.08753		6.86278		16.1669		storkhead box 2	NM_020225	STOX2	4q35.1	---	8098549
5.81389	5.35761	5.71099		5.6275		6.2081	6.38997	7.0113		6.53645		16.1521		kallikrein-related peptidase 7	NM_139277	KLK7	19q13.41	extracellular region	8038695
7.63626	7.55452	8.27318		7.82132		9.03547	8.95596	9.26204		9.08449		16.1503		ceroid-lipofuscinosis, neuronal 3	NM_000086	CLN3	16p12.1	Golgi membrane // membrane fraction // nucleus // cytoplasm // mitochondrion // lysosome // early endosome // late endosome // autophagic vacuole // endoplasmic reticulum // Golgi apparatus // Golgi stack // trans-Golgi network // plasma membrane // caveola // synaptic vesicle // integral to membrane // integral to endoplasmic reticulum membrane // neuron projection	8000543
7.58095	7.23184	8.08146		7.63141		8.92896	8.72879	8.93366		8.86381		16.1489		PHD finger protein 16	NM_014735	PHF16	Xp11.23	histone acetyltransferase complex	8167013
5.83843	6.2559	6.42644		6.17359		6.66971	7.16169	7.67705		7.16948		16.1315		zinc finger protein 256	NM_005773	ZNF256	19q13.43	intracellular // nucleus	8039706
3.86664	3.28585	3.13083		3.42778		4.41795	3.4991	4.02457		3.98054		16.126		---	---	---	---	---	7922992
8.14595	8.29463	9.00108		8.48055		10.1318	9.73617	9.67597		9.84797		16.1242		ATM interactor	NM_015251	ATMIN	16q23.2	intracellular // nucleus	8156575
5.62217	5.86992	5.99729		5.82979		6.7735	5.06003	8.47168		6.7684		16.1002		---	---	---	---	---	8095005
6.2144	4.59485	6.57564		5.79496		6.65722	5.58084	7.94255		6.72687		16.0814		transmembrane protein 98	NM_015544	TMEM98	17q11.2	endoplasmic reticulum // membrane // integral to membrane	8006415
7.74183	6.46243	7.35202		7.18543		9.51814	7.42925	8.07451		8.34063		16.0771		hypothetical protein FLJ32065	NR_026903	FLJ32065	17q24.1	---	8017704
2.72818	2.66468	2.57011		2.65432		3.60824	2.67442	2.96015		3.08094		16.0725		---	---	---	---	---	8079375
5.81389	4.85995	5.96305		5.54563		8.18948	4.69334	6.42637		6.4364		16.0625		fibroblast growth factor 13	NM_004114	FGF13	Xq26.3	nucleus // cytoplasm	8175444
3.71401	2.93079	3.66093		3.43524		3.89024	3.59002	4.47991		3.98672		16.0536		---	---	---	---	---	8092218
3.32526	3.07029	3.2054		3.20032		4.29308	3.03608	3.8127		3.71396		16.0497		---	---	---	---	---	7957602
7.78154	7.41544	8.16651		7.78783		9.704	7.89686	9.51077		9.03721		16.0427		mevalonate (diphospho) decarboxylase	NM_002461	MVD	16q24.3	peroxisome // cytosol // cytosol	8003332
5.21729	3.94532	4.98681		4.71648		5.68285	4.3877	6.34881		5.47312		16.0426		kinesin family member 9	NM_182902	KIF9	3p21.31	microtubule	8086729
4.9808	4.18739	5.01681		4.72834		6.06459	4.7206	5.6726		5.48593		16.0225		peroxisomal biogenesis factor 5-like	NM_016559	PEX5L	3q26.33	cytoplasm // membrane	8092277
6.1549	4.75873	5.93974		5.61779		7.11822	5.6399	6.7945		6.51754		16.0161		carbohydrate (keratan sulfate Gal-6) sulfotransferase 1	NM_003654	CHST1	11p11.2-p11.1	Golgi membrane // Golgi apparatus // membrane // integral to membrane	7947599
5.01103	4.62299	5.20475		4.94626		5.31768	6.89859	4.99846		5.73824		16.0119		furry homolog (Drosophila)	NM_023037	FRY	13q13.1	membrane // integral to membrane	7968417
7.55654	6.89483	7.39559		7.28232		8.09239	8.79072	8.45946		8.44752		16.0004		ubiquitin specific peptidase 18	NM_017414	USP18	22q11.21	nucleus	8074606
7.20216	6.58498	7.59531		7.12748		7.86376	8.01046	8.9278		8.26734		15.9924		pyridine nucleotide-disulphide oxidoreductase domain 1	NM_024854	PYROXD1	12p12.1	---	7954382
4.0153	3.79965	4.61367		4.14287		5.05143	4.13616	5.22801		4.8052		15.9871		---	---	---	---	---	7985200
3.79073	3.35896	3.66093		3.60354		3.95965	4.09795	4.47991		4.17917		15.9741		---	---	---	---	---	8042827
5.69192	4.44168	5.6259		5.25317		6.04831	5.37017	6.85784		6.09211		15.9702		phospholipase A2, group VI (cytosolic, calcium-independent)	NM_003560	PLA2G6	22q13.1	nucleus // cytoplasm // centrosome // membrane	8076025
3.94156	4.08628	4.24099		4.08961		5.20691	5.28033	3.74085		4.7427		15.9695		radial spoke head 10 homolog B (Chlamydomonas)	NM_173565	RSPH10B	7p22.1	---	8131452
3.94156	4.08628	4.24099		4.08961		5.20691	5.28033	3.74085		4.7427		15.9695		radial spoke head 10 homolog B (Chlamydomonas)	NM_173565	RSPH10B	7p22.1	---	8138009
2.83887	2.829	3.05882		2.9089		3.15487	4.38429	2.58088		3.37335		15.9665		---	---	---	---	---	8063447
6.36202	6.18985	6.79937		6.45041		8.4385	6.30128	7.70048		7.48009		15.963		heterogeneous nuclear ribonucleoprotein A1	NM_031157	HNRNPA1	12q13.1	nucleus // nucleoplasm // spliceosomal complex // nucleolus // cytoplasm // heterogeneous nuclear ribonucleoprotein complex	7955890
7.30904	7.15974	7.69841		7.38906		8.1919	8.60491	8.90683		8.56788		15.9535		UDP-Gal:betaGlcNAc beta 1,4- galactosyltransferase, polypeptide 4	NM_212543	B4GALT4	3q13.3	Golgi apparatus // membrane // integral to membrane	8089743
6.60338	6.36505	6.975		6.64781		7.25972	8.15404	7.71052		7.70809		15.9493		zinc finger protein 165	NM_003447	ZNF165	6p21.3	intracellular // nucleus	8117630
6.39668	6.0224	6.75998		6.39302		7.11822	7.48271	7.63667		7.41253		15.9474		2',5'-oligoadenylate synthetase 1, 40/46kDa	NM_016816	OAS1	12q24.1	nucleus // cytoplasm // mitochondrion // endoplasmic reticulum // microsome	7958884
7.34114	7.25542	7.78373		7.4601		8.53601	8.35081	9.06143		8.64942		15.9425		major facilitator superfamily domain containing 11	NM_024311	MFSD11	17q25	cellular_component // membrane // integral to membrane	8010092
3.09475	2.86257	3.13083		3.02938		3.05282	2.9441	4.53909		3.512		15.9313		small nucleolar RNA, C/D box 116-29	NR_003360	SNORD116-29	15q11.2	---	7982006
4.26172	3.35896	4.03194		3.88421		6.08584	2.94454	4.47674		4.50237		15.9149		proteoglycan 4	NM_005807	PRG4	1q25-q31	extracellular region	7908312
7.944	6.7682	7.64661		7.45294		8.56959	7.0429	10.3026		8.63838		15.9057		---	---	---	---	---	8180224
8.36743	8.01123	8.76945		8.3827		10.0388	8.81013	10.2946		9.71453		15.8877		nucleoporin 210kDa	NM_024923	NUP210	3p25.1	nucleus // nuclear pore // endoplasmic reticulum // membrane // integral to membrane	8085431
5.40102	4.85995	5.6259		5.29562		6.72698	4.4536	7.22888		6.13649		15.8784		histone cluster 2, H2bf	AK092418	HIST2H2BF	1q21.2	nucleosome // nucleus // chromosome	7919604
6.07011	5.322	5.93974		5.77728		6.38856	7.04662	6.64366		6.69294		15.8493		transgelin	NM_001001522	TAGLN	11q23.2	cytoplasm	7944082
7.46151	7.01124	7.07019		7.18098		9.21172	7.90607	7.83924		8.31901		15.8478		protein tyrosine phosphatase, non-receptor type 18 (brain-derived)	NM_014369	PTPN18	2q21.1	nucleus // cytoplasm	8045182
5.62217	5.24803	5.10372		5.32464		7.4913	5.80382	5.20981		6.16831		15.8445		---	---	---	---	---	8040247
5.43477	3.87342	4.24099		4.51639		5.64185	5.24272	4.81091		5.23183		15.8409		---	---	---	---	---	8043032
9.76716	9.43965	9.9572		9.72134		11.8381	10.9312	11.0134		11.2609		15.837		NADH dehydrogenase (ubiquinone) 1 beta subcomplex, 9, 22kDa	NM_005005	NDUFB9	8q13.3	mitochondrion // mitochondrial inner membrane // mitochondrial respiratory chain complex I // membrane // respiratory chain	8148270
7.72284	7.78791	7.84788		7.78621		9.58859	8.85444	8.61473		9.01925		15.8362		chromatin modifying protein 4A	NM_014169	CHMP4A	14q12	endosome // membrane // cytoplasmic vesicle membrane // cytoplasmic vesicle	7978174
3.86664	3.28613	4.13791		3.76356		4.62054	3.97819	4.47991		4.35955		15.8357		polycystic kidney disease 1-like 3	NM_181536	PKD1L3	16q22.2	membrane // integral to membrane	8002629
3.32526	3.1414	3.81174		3.42613		4.59424	3.4991	3.8127		3.96868		15.8355		olfactory receptor, family 7, subfamily E, member 18 pseudogene	X89673	OR7E18P	19p13.2	---	8033742
5.92486	5.64361	6.18663		5.91837		8.00417	4.96205	7.5984		6.85488		15.8238		brain expressed, X-linked 4	NM_001080425	BEX4	Xq22.1-q22.3	nucleus // cytoplasm	8169009
2.98509	3.14296	3.54647		3.22484		4.55646	2.9441	3.70476		3.7351		15.8229		---	---	---	---	---	8175440
7.05916	6.77165	7.79637		7.20906		8.38292	7.05121	9.60884		8.34766		15.794		---	---	---	---	---	8180282
4.77047	4.01633	3.50863		4.09847		4.80782	3.93743	5.49205		4.74577		15.7936		retinaldehyde binding protein 1-like 2	NM_001010852	RLBP1L2	6q22.31	intracellular	8121803
5.05565	4.70574	5.33564		5.03234		5.99844	4.63676	6.84557		5.82692		15.7895		ARD1 homolog B (S. cerevisiae)	NM_032693	ARD1B	4q21.21	nucleus // cytoplasm	8101253
6.26067	6.50747	6.69744		6.48853		7.29693	6.78575	8.45312		7.51193		15.7725		ribonuclease L (2',5'-oligoisoadenylate synthetase-dependent)	NM_021133	RNASEL	1q25	cellular_component // cytoplasm // mitochondrion	7922707
8.04715	7.78741	8.30506		8.04654		10.1202	8.94054	8.88521		9.31532		15.768		dehydrogenase/reductase (SDR family) member 4	NM_021004	DHRS4	14q11.2	mitochondrion // peroxisome	7973448
6.35254	6.45102	6.6055		6.46969		7.75955	6.59294	8.11632		7.4896		15.7645		small Cajal body-specific RNA 13	NR_003002	SCARNA13	14q32.12	---	7981181
8.85254	8.40515	9.01787		8.75852		10.9758	8.73763	10.7039		10.1391		15.7629		GINS complex subunit 2 (Psf2 homolog)	NM_016095	GINS2	16q24.1	nucleus	8003204
7.03016	6.01812	6.92171		6.65666		8.88007	6.78873	7.44817		7.70566		15.7585		yippee-like 3 (Drosophila)	NM_031477	YPEL3	16p11.2	nucleus // nucleolus	8000791
6.97715	6.86658	6.86857		6.9041		8.39837	7.64285	7.93372		7.99165		15.7522		IQ motif containing K	NM_153208	IQCK	16p12.3	---	7993713
6.36202	6.04442	6.19735		6.20126		7.69996	6.45719	7.37509		7.17741		15.7411		FYVE, RhoGEF and PH domain containing 3	NM_001083536	FGD3	---	ruffle // intracellular // cytoplasm // Golgi apparatus // cytoskeleton // lamellipodium	8156373
6.38062	5.95535	6.44916		6.26171		7.90567	6.20347	7.63267		7.24727		15.7394		Down syndrome critical region gene 6	NM_018962	DSCR6	21q22.2	nucleus	8068512
8.05936	7.65078	8.16923		7.95979		9.52433	8.65487	9.45827		9.21249		15.7379		proteasomal ATPase-associated factor 1	NM_025155	PAAF1	11q13.4	cytosol // protein complex	7942476
4.4564	3.65295	4.16605		4.0918		4.29045	3.17515	6.74149		4.7357		15.7362		leucine rich repeat neuronal 3	NM_001099660	LRRN3	7q31.1	membrane // integral to membrane	8135488
4.12161	3.72758	4.64084		4.16334		4.72888	5.56497	4.16063		4.81816		15.7281		TAF7-like RNA polymerase II, TATA box binding protein (TBP)-associated factor, 50kDa	NM_024885	TAF7L	Xq22.1	nucleus // transcription factor TFIID complex // nucleolus // cytoplasm	8174029
7.19584	6.88844	6.76587		6.95005		7.94397	8.08408	8.10016		8.04273		15.7219		antagonist of mitotic exit network 1 homolog (S. cerevisiae)	NR_004854	AMN1	12p11.21	---	7962185
4.76291	4.4127	4.13791		4.43784		5.61835	4.31791	5.46854		5.13493		15.7079		hypothetical LOC100128292	NR_024585	LOC100128292	10q22.3	---	7928545
6.33521	6.17908	6.77967		6.43132		9.21522	6.28275	6.8265		7.44149		15.707		pregnancy specific beta-1-glycoprotein 5	NM_002781	PSG5	19q13.2	extracellular region	8037272
7.944	8.44295	8.64523		8.34406		9.17974	9.57717	10.2058		9.65424		15.7019		exonuclease 3'-5' domain containing 2	NM_018199	EXD2	14q24.1	intracellular	7975311
5.09832	4.47726	5.47189		5.01583		5.45716	5.35273	6.6		5.8033		15.6998		transcription factor AP-2 beta (activating enhancer binding protein 2 beta)	NM_003221	TFAP2B	6p12	nucleus	8120194
4.29464	4.15438	4.46462		4.30455		5.06235	3.93743	5.94032		4.98003		15.6924		transient receptor potential cation channel, subfamily M, member 8	NM_024080	TRPM8	2q37.1	membrane // integral to membrane	8049394
6.73137	6.83291	6.82504		6.79644		8.33508	7.15849	8.09279		7.86212		15.68		acyl-Coenzyme A dehydrogenase family, member 11	NM_032169	ACAD11	3q22.1	peroxisome	8090715
5.83843	5.47569	5.86744		5.72719		6.40951	5.95598	7.50749		6.62433		15.6646		ankyrin repeat domain 57 pseudogene // ankyrin repeat domain 57 pseudogene // ankyrin repeat domain 57 pseudogene // ankyrin repeat domain 57 pseudogene	NR_027420 // NR_027420 // NR_027420 // NR_027420	LOC389834 // LOC389834 // LOC389834 // LOC389834	--- // --- // --- // ---	---	8104139
7.292	6.74268	7.42104		7.15191		8.4731	7.91469	8.42835		8.27205		15.6621		zinc finger and BTB domain containing 7B	NM_015872	ZBTB7B	1q21.3	intracellular // nucleus // nucleolus	7905854
4.36135	3.80079	4.03194		4.06469		4.537	4.17436	5.39254		4.7013		15.6619		---	---	---	---	---	7972173
5.71018	5.76767	5.96781		5.81522		7.18316	6.09689	6.89728		6.72578		15.6582		aquaporin 11	NM_173039	AQP11	11q14.1	cytoplasm // endoplasmic reticulum // cell surface // membrane // integral to membrane	7942774
5.18012	5.4919	6.03081		5.56761		6.24661	6.94091	6.12941		6.43898		15.6506		acyl-CoA thioesterase 11	NM_147161	ACOT11	1p32.3	cytoplasm	7901613
3.86614	3.8005	4.03194		3.89953		5.98706	3.31456	4.2278		4.50981		15.6501		low density lipoprotein-related protein 1B (deleted in tumors)	NM_018557	LRP1B	2q21.2	membrane fraction // membrane // integral to membrane	8055496
6.50821	6.20895	6.81797		6.51171		7.33526	6.1913	9.06473		7.53043		15.6444							8071044
5.53151	5.24803	5.1852		5.32158		6.67144	5.58084	6.20957		6.15395		15.6414		golgi autoantigen, golgin subfamily a, 7B	NM_001010917	GOLGA7B	10q24.2	Golgi apparatus // membrane	7929711
6.27154	5.55463	6.44926		6.09181		7.13884	7.40823	6.58505		7.04404		15.6313		DMRT-like family A2	NM_032110	DMRTA2	1p32.3	nucleus	7915991
9.02584	8.28078	9.18086		8.82916		11.1811	9.0871	10.3521		10.2068		15.6028		pancreatic progenitor cell differentiation and proliferation factor homolog (zebrafish)	NM_024299	PPDPF	20q13.33	---	8064100
4.29553	4.08628	4.49711		4.29297		4.75671	4.24813	5.88279		4.96254		15.5969		hypothetical LOC29075	AF161557	HSPC072	20p11.23	---	8065242
5.78801	5.30374	5.91604		5.66926		6.19075	6.64181	6.82628		6.55294		15.5872		solute carrier family 25, member 45	NM_182556	SLC25A45	11q13.1	mitochondrion // mitochondrial inner membrane // membrane // integral to membrane	7949400
8.1712	8.31289	8.20154		8.22854		9.51162	9.56959	9.45122		9.51081		15.5832		AT rich interactive domain 5B (MRF1-like)	NM_032199	ARID5B	10q21.2	intracellular // nucleus // nucleus	7927732
4.98905	4.65113	4.75127		4.79715		5.73649	4.74787	6.14973		5.5447		15.5831		chaperonin containing TCP1, subunit 6B (zeta 2)	NM_006584	CCT6B	17q12	cytoplasm	8014172
4.29553	3.07029	3.81174		3.72585		5.35514	3.67961	3.88405		4.30627		15.578		teashirt zinc finger homeobox 2	ENST00000371497	TSHZ2	20q13.2	intracellular // nucleus	8063444
5.21884	5.42476	5.41984		5.35448		6.38227	5.59514	6.58693		6.18812		15.569		ankyrin repeat, family A (RFXANK-like), 2	NM_023039	ANKRA2	5q12-q13	membrane fraction // cytoplasm // cytosol // cytoskeleton // membrane	8112596
2.72818	2.72946	2.77172		2.74312		3.5374	2.9441	3.02803		3.16984		15.556		---	---	---	---	---	8163381
6.30841	6.3038	7.22286		6.61169		8.04947	6.24533	8.62573		7.64018		15.5555		WD repeat domain 5B	NM_019069	WDR5B	3q21.1	---	8089993
7.32854	7.00142	7.47408		7.26801		8.51023	7.53808	9.14714		8.39848		15.554		biogenesis of lysosomal organelles complex-1, subunit 1	NM_001487	BLOC1S1	12q13-q14	cytosol // BLOC-1 complex	7956013
5.76166	5.39237	6.05271		5.73558		7.22815	6.08456	6.56995		6.62755		15.5515		zinc finger protein 708	NM_021269	ZNF708	19p12	intracellular // nucleus	8035803
7.01407	7.15989	7.01549		7.06315		7.75443	8.90948	7.82022		8.16138		15.5487		Ca++-dependent secretion activator 2	NM_017954	CADPS2	7q31.3	membrane // cell junction // cytoplasmic vesicle // synapse	8142585
5.63609	4.6541	5.85009		5.38009		6.69948	5.98012	5.96846		6.21602		15.5373		fibroblast growth factor 11	NM_004112	FGF11	17p13.1	---	8004408
7.42	7.5469	7.74404		7.57031		8.22848	8.1842	9.82656		8.74641		15.5357		nudix (nucleoside diphosphate linked moiety X)-type motif 12	NM_031438	NUDT12	5q21.2	nucleus // peroxisome	8113413
7.71599	7.19969	7.66094		7.52554		7.99961	8.20879	9.87499		8.69446		15.5328		LIM domain kinase 2	NM_016733	LIMK2	22q12.2	soluble fraction // nucleus // cytoplasm // mitochondrion // cis-Golgi network	8072461
6.98019	6.06612	6.87506		6.64046		8.26646	7.80647	6.94259		7.67184		15.5318		unc-51-like kinase 2 (C. elegans)	NM_014683	ULK2	17p11.2	---	8013399
8.31834	8.2555	8.66476		8.41287		9.34159	9.89795	9.91816		9.71923		15.5282		craniofacial development protein 1	NM_006324	CFDP1	16q22.2-q22.3	cellular_component	8002865
7.6348	7.58868	8.18676		7.80341		8.72256	8.54428	9.77438		9.01374		15.5102		integrator complex subunit 1	NM_001080453	INTS1	7p22.3	nucleus // membrane // integral to membrane	8137739
4.15861	3.58014	3.81174		3.85016		4.59424	4.4536	4.29303		4.44696		15.5004		synaptotagmin XIV-like	NR_027094	SYT14L	4q13.2	---	8100699
4.66268	3.50626	4.8286		4.33251		6.49074	3.12869	5.39254		5.00399		15.4986		coiled-coil domain containing 29	ENST00000333394	CCDC29	9q21.11	---	8069508
6.23596	5.96577	6.27283		6.15819		6.60537	6.43232	8.29836		7.11202		15.4888		hereditary sensory neuropathy, type II	NM_213655	HSN2	12p13.3	extracellular region	7952986
6.19484	5.72306	6.12592		6.01461		6.80594	6.09511	7.93743		6.94616		15.4882		involucrin	NM_005547	IVL	1q21	cornified envelope // cytoplasm	7905533
6.8979	6.56988	6.87506		6.78094		7.67899	7.13815	8.67598		7.83104		15.486		sulfatase modifying factor 1	NM_182760	SUMF1	3p26.1	endoplasmic reticulum // endoplasmic reticulum lumen	8085094
7.43675	6.58498	7.34324		7.12166		8.08709	8.07073	8.51572		8.22452		15.486		AT rich interactive domain 1B (SWI1-like)	NM_020732	ARID1B	6q25.1	intracellular // nucleus // nucleolus // cytoplasm // SWI/SNF complex	8122971
6.17501	5.72796	6.49796		6.13364		8.64	4.17436	8.43465		7.083		15.478		echinoderm microtubule associated protein like 1	NM_001008707	EML1	14q32	cytoplasm // microtubule // microtubule associated complex	7976698
5.23846	4.41322	5.65323		5.10164		7.33824	4.7206	5.61459		5.89114		15.4756		homeobox A7	NM_006896	HOXA7	7p15-p14	nucleus	8138745
7.07953	6.7549	7.0266		6.95368		7.9826	7.84463	8.26212		8.02978		15.4754		phospholysine phosphohistidine inorganic pyrophosphate phosphatase	NM_022126	LHPP	10q26.13	---	7931204
4.42534	3.83711	4.24018		4.16754		5.26126	4.24813	4.92806		4.81248		15.4753		---	---	---	---	---	8002301
3.79073	3.58014	3.95958		3.77682		4.02833	5.24272	3.8127		4.36125		15.4743		ret finger protein-like 4B	NM_001013734	RFPL4B	6q21	---	8121553
6.27154	5.72796	6.03081		6.0101		7.07607	7.55354	6.18994		6.93985		15.4698		protein phosphatase 1, regulatory (inhibitor) subunit 14C	NM_030949	PPP1R14C	6q24.3-q25.3	cytoplasm // membrane	8122734
5.57684	4.63065	5.86405		5.35718		6.08458	6.45719	6.01599		6.18592		15.4697		ADAM metallopeptidase with thrombospondin type 1 motif, 4	NM_005099	ADAMTS4	1q21-q23	extracellular region // proteinaceous extracellular matrix // extracellular space	7921821
7.93516	7.36879	7.79026		7.69807		9.92989	7.76714	8.96432		8.88712		15.446		zinc finger protein 687	NM_020832	ZNF687	1q21.3	intracellular // nucleus // nucleolus	7905382
4.15861	4.59485	5.79134		4.84827		5.83113	5.20411	5.75505		5.59676		15.4385		zinc finger protein 616	BC032805	ZNF616	19q13.41	intracellular // nucleus	8038952
6.49592	6.20948	6.63491		6.44677		7.5994	6.61269	8.11377		7.44196		15.437		family with sequence similarity 117, member A	NM_030802	FAM117A	17q21.33	---	8016590
3.44202	2.89668	2.98414		3.10761		3.71445	2.853	4.19452		3.58732		15.4366		folate hydrolase 1B	NM_153696	FOLH1B	11q14.3	cytoplasm	7942998
3.71401	3.1414	3.35633		3.40391		4.35621	3.40716	4.02457		3.92932		15.4354		---	---	---	---	---	8067944
4.82181	4.15504	4.24099		4.40594		5.69852	4.74787	4.81091		5.08577		15.4296		PTPN13-like, Y-linked	NM_004676	PRY	Yq11.223	---	8176935
4.82181	4.15504	4.24099		4.40594		5.69852	4.74787	4.81091		5.08577		15.4296		PTPN13-like, Y-linked	NM_004676	PRY	Yq11.223	---	8177395
3.48099	3.80079	4.10305		3.79494		4.80782	3.85357	4.47991		4.38043		15.4282		T-box 22	NM_016954	TBX22	Xq21.1	nucleus	8168534
5.40102	4.9275	5.91584		5.41479		6.44027	4.42065	7.88873		6.24988		15.4225		phospholipase A2, group IVF	NM_213600	PLA2G4F	15q15.1	cytoplasm // lysosome // cytosol // membrane	7987815
3.88826	3.32522	4.4217		3.87839		4.87308	3.44812	5.10778		4.47633		15.4171		---	---	---	---	---	8121559
5.83578	4.93173	5.55021		5.43924		5.91515	5.56497	7.35287		6.27766		15.4143		activin A receptor, type IC	NM_145259	ACVR1C	2q24.1	membrane // integral to membrane // activin receptor complex	8055992
5.17958	5.04421	5.03935		5.08771		5.69743	5.42009	6.49816		5.87189		15.4133		DnaJ (Hsp40) homolog, subfamily C, member 28	NM_017833	DNAJC28	21q22.11	---	8070097
5.36647	5.12953	5.53548		5.34383		10.3364	3.93743	4.2278		6.16722		15.4083		carbonic anhydrase II	NM_000067	CA2	8q22	nucleus // cytoplasm // apical part of cell	8147132
4.79839	3.96658	5.21142		4.6588		5.70618	5.15029	5.27307		5.37651		15.4055		---	---	---	---	---	7903117
3.40304	2.79544	3.2054		3.13463		3.5374	3.22162	4.09346		3.61749		15.4043		glutathione S-transferase alpha 5	NM_153699	GSTA5	6p12.2	cytoplasm	8127079
5.43477	4.85995	5.84252		5.37908		6.55352	5.87929	6.18994		6.20759		15.4025		---	---	---	---	---	8137637
8.18613	7.96579	8.73938		8.2971		9.17725	9.42178	10.1215		9.57352		15.3839		cytochrome c oxidase subunit VIIa polypeptide 2 (liver)	NM_001865	COX7A2	6q12	mitochondrion // mitochondrial respiratory chain // membrane	8127629
3.94156	2.79602	3.54666		3.42808		4.64685	3.40582	3.8127		3.95513		15.3745		---	---	---	---	---	7903970
3.88826	3.54323	3.77418		3.73522		4.52881	3.96374	4.4341		4.30888		15.3581		LP2570	ENST00000380078	LOC100131796	15q22.33	---	7989951
6.1549	5.6439	6.21688		6.00522		6.9417	6.14696	7.69353		6.9274		15.3562		chromosome 14 open reading frame 79	NM_174891	C14orf79	14q32.33	---	7977331
6.44715	6.08749	6.48191		6.33885		7.23774	6.86868	7.82659		7.311		15.3364		post-GPI attachment to proteins 3	NM_033419	PGAP3	17q12	endoplasmic reticulum // Golgi apparatus // membrane // integral to membrane // intrinsic to endoplasmic reticulum membrane	8014871
6.47985	5.585	6.17755		6.0808		6.83201	6.40707	7.80094		7.01334		15.3358		vasohibin 2	NM_024749	VASH2	1q32.3	---	7909642
4.71744	3.69078	4.34006		4.24943		5.05992	4.51581	5.12751		4.90108		15.3352		fibromodulin	NM_002023	FMOD	1q32	extracellular region // proteinaceous extracellular matrix	7923578
3.01936	3.28585	3.66093		3.32205		3.95965	3.93743	3.59627		3.83112		15.3241		---	---	---	---	---	8017597
4.60713	3.1414	3.95469		3.90107		5.725	3.17563	4.59584		4.49882		15.3227		acidic (leucine-rich) nuclear phosphoprotein 32 family, member D	NM_012404	ANP32D	12q13.11	---	7955117
3.40304	3.50626	3.35633		3.42187		4.29308	3.59002	3.95472		3.94594		15.3153		---	---	---	---	---	8175151
3.63668	3.00006	4.24099		3.62591		3.60824	4.17436	4.75971		4.18077		15.3027		---	---	---	---	---	8154660
5.1398	4.01633	4.10305		4.41972		6.24661	4.3877	4.6526		5.09564		15.2932		small nucleolar RNA, H/ACA box 30	NR_002966	SNORA30	16p11.2	---	7994926
6.64752	5.6439	6.00858		6.1		7.33923	5.48746	8.27149		7.03273		15.2907		---	---	---	---	---	8155453
6.64752	5.6439	6.00858		6.1		7.33923	5.48746	8.27149		7.03273		15.2907		---	---	---	---	---	8161375
4.77047	4.53689	5.06123		4.78953		5.72603	4.51701	6.32204		5.52169		15.2868		chromosome 12 open reading frame 60	NM_175874	C12orf60	12p12.3	---	7954132
7.48944	6.82644	7.29141		7.20243		9.09482	8.24125	7.57389		8.30332		15.2849		family with sequence similarity 185, member A	NR_026879	FAM185A	7q22.1	---	8135211
3.63668	3.28585	3.73661		3.55305		4.02833	3.4991	4.75971		4.09571		15.2732		---	---	---	---	---	8106720
7.54487	7.45886	7.85412		7.61928		8.51534	8.75605	9.07671		8.7827		15.2694		carnitine palmitoyltransferase 2	NM_000098	CPT2	1p32	mitochondrion // mitochondrial inner membrane // mitochondrial inner membrane // membrane	7901549
6.93374	7.02238	7.46256		7.13956		8.28508	7.90004	8.50385		8.22966		15.2684		TatD DNase domain containing 1	NR_027427	TATDN1	8q24.13	nucleus	8152759
4.74395	4.08628	4.52692		4.45238		5.35514	4.09795	5.94261		5.1319		15.2619		nebulin	NM_004543	NEB	2q22	cytoplasm // actin cytoskeleton // sarcomere // Z disc	8055711
3.86664	3.21329	4.03194		3.70396		4.95247	3.31456	4.53909		4.2687		15.2471		---	---	---	---	---	7966686
7.21193	6.7682	7.58031		7.18681		8.51148	8.16422	8.16996		8.28188		15.2372		phosphoenolpyruvate carboxykinase 2 (mitochondrial)	NM_004563	PCK2	14q11.2	mitochondrion	7973530
7.20216	7.02238	7.29812		7.17422		8.85465	7.62836	8.31744		8.26682		15.2294		chromosome 21 open reading frame 119	NR_026845	C21orf119	21q22.11	---	8068200
4.81858	3.83645	4.32989		4.3283		5.24491	5.29773	4.41837		4.987		15.2184		heparan sulfate 6-O-sulfotransferase 2	NM_001077188	HS6ST2	Xq26.2	membrane // integral to membrane	8175195
9.66756	9.51964	10.2614		9.81619		11.4716	11.2027	11.2556		11.31		15.2175		glycogenin 1	NM_004130	GYG1	3q24-q25.1	cytosol	8083272
7.27846	6.87934	7.51082		7.22288		8.529	7.74303	8.69229		8.32144		15.2095		MON1 homolog B (yeast)	NM_014940	MON1B	16q23.1	---	7997321
3.40726	2.35995	3.69413		3.15378		4.13666	2.63087	4.13265		3.6334		15.2076		---	---	---	---	---	7910948
7.31197	7.54242	7.87207		7.57549		9.32703	8.18835	8.66536		8.72691		15.1993		nuclear receptor coactivator 2	NM_006540	NCOA2	8q13.3	nucleus // cytoplasm	8151254
4.15861	2.79544	4.10305		3.6857		5.08503	3.76755	3.88405		4.24554		15.1896		ubiquitin specific peptidase 50	NM_203494	USP50	15q21.1	---	7988705
4.54401	3.47109	3.95096		3.98869		5.31875	4.17436	4.2902		4.59443		15.1867		---	---	---	---	---	8126950
3.79073	3.28585	3.95958		3.67872		4.537	3.31456	4.8606		4.23739		15.1864		ATP-binding cassette, sub-family C (CFTR/MRP), member 13	NR_003087	ABCC13	21q11.2	nucleus // membrane // integral to membrane	8067877
7.08876	7.39026	7.91799		7.46567		8.52806	8.6385	8.63023		8.59893		15.1797		KIAA2026	NM_001017969	KIAA2026	9p24.1	---	8160011
4.15861	3.58014	4.30759		4.01545		4.95247	4.69334	4.2278		4.62454		15.1686		---	---	---	---	---	8078960
2.91467	2.69707	3.2054		2.93905		3.85473	2.63087	3.66866		3.38475		15.1649		TCR gamma alternate reading frame protein	M30894	TARP	7p15-p14	---	8139100
3.48099	2.86257	3.243		3.19552		4.41795	2.80926	3.81245		3.67989		15.1576		---	---	---	---	---	8136652
3.55894	4.28851	4.55673		4.13473		6.10707	3.22162	4.95564		4.76144		15.1574		ankyrin repeat domain 20B	NR_003366	ANKRD20B	2q11.1	---	7970381
5.48252	5.88866	5.72308		5.69809		5.96377	6.86374	6.85181		6.55977		15.1224		toll-like receptor 5	NM_003268	TLR5	1q41-q42	membrane // integral to membrane	7924499
6.37945	7.32755	7.60044		7.10248		7.61787	8.21608	8.69508		8.17634		15.1196		zinc finger protein 33B	NM_006955	ZNF33B	10q11.2	intracellular // nucleus	7933139
6.75828	7.02238	7.36966		7.05011		8.24284	7.40823	8.69699		8.11602		15.1191		poly(A) binding protein interacting protein 2B	NM_020459	PAIP2B	2p13.3	cytoplasm	8052940
7.75973	7.20272	8.00489		7.65578		8.49957	8.67019	9.26648		8.81208		15.1036		CKLF-like MARVEL transmembrane domain containing 4	NM_181521	CMTM4	16q21-q22.1	extracellular space // membrane // integral to membrane	8001830
7.17247	7.33093	7.69614		7.39985		8.47139	7.56882	9.51177		8.51733		15.1014		ER lipid raft associated 2	NM_007175	ERLIN2	8p11.2	cytoplasm // endoplasmic reticulum // endoplasmic reticulum membrane // membrane // integral to membrane	8145835
7.00602	6.76668	7.38697		7.05323		8.71042	7.58024	8.06068		8.11711		15.0837		coiled-coil domain containing 52	NM_144718	CCDC52	3q13.2	---	8089627
7.73807	7.65453	8.40025		7.93095		8.67358	8.58623	10.1183		9.12604		15.0687		ral guanine nucleotide dissociation stimulator-like 2	NM_004761	RGL2	6p21.3	cellular_component // intracellular	8125687
4.72708	3.37038	5.19103		4.4295		5.26897	4.93763	5.0839		5.09684		15.0657		---	---	---	---	---	7921358
6.04994	5.45948	6.09554		5.86832		7.15917	6.26422	6.83297		6.75212		15.0606		---	---	---	---	---	7906305
8.02931	7.22883	7.96798		7.74204		9.76807	7.71331	9.24081		8.90739		15.0522		GATS protein-like 1	NM_001145063	GATSL1	7q11.23	---	8133540
8.02931	7.22883	7.96798		7.74204		9.76807	7.71331	9.24081		8.90739		15.0522		GATS protein-like 1	NM_001145063	GATSL1	7q11.23	---	8140249
6.10334	5.50849	6.22264		5.94482		7.4465	6.14132	6.93023		6.83935		15.0472		---	---	---	---	---	8180314
7.35087	6.85714	7.30654		7.17152		8.11278	8.38958	8.24846		8.25027		15.0422		Rho guanine nucleotide exchange factor (GEF) 5	NM_005435	ARHGEF5	7q33-q35	intracellular	8136987
4.3107	3.50626	4.02636		3.94778		5.14597	4.05845	4.41915		4.54119		15.0316		---	---	---	---	---	7957159
7.58562	6.8027	7.46172		7.28335		8.43395	8.23762	8.46201		8.37786		15.0277		biphenyl hydrolase-like (serine hydrolase)	NR_026650	BPHL	6p25	mitochondrion	8116635
10.1089	10.0728	10.6251		10.2689		11.3185	12.7613	11.3553		11.8117		15.0239		solute carrier family 44, member 2	NM_020428	SLC44A2	19p13.1	membrane // integral to membrane	8025672
7.64197	7.7269	8.29131		7.88673		9.57634	8.31453	9.32356		9.07148		15.0221		chromodomain helicase DNA binding protein 7	NM_017780	CHD7	8q12.1-q12.2	chromatin // nucleus	8146579
5.01103	4.8335	5.76505		5.20319		6.59511	5.22238	6.13673		5.98474		15.0205		non-protein coding RNA 95	NR_024348	NCRNA00095	16p11.2	---	8000957
3.81039	2.93131	3.43248		3.39139		4.24832	3.36036	4.09346		3.90071		15.018		zinc finger protein 91 pseudogene	NR_024380	LOC441666	10q11.21	---	8045330
3.94156	3.50626	4.03194		3.82658		4.70409	4.01894	4.47991		4.40098		15.0107		---	---	---	---	---	8168727
6.74489	6.24795	6.86272		6.61852		7.44237	6.31946	9.07416		7.612		15.0105		hypothetical gene supported by AK096952; AK126241; BC068588 // hypothetical gene supported by AK096952; AK126241; BC068588	AK126241 // AK126241	FLJ44253 // FLJ44253	4p16.3 // 4p16.3	---	8071051
3.55852	3.25018	3.35633		3.38834		4.26086	3.40683	4.02264		3.89678		15.0054		---	---	---	---	---	8086389
5.29478	4.01633	4.24099		4.51736		4.70409	5.38761	5.49205		5.19458		14.9915		---	---	---	---	---	8117284
4.6344	4.0158	5.20475		4.61832		5.45567	4.87416	5.60002		5.30995		14.9759		testis development related protein 1	DQ168992	TDRG1	6p21.2	---	8119386
2.80464	3.07029	3.50863		3.12785		3.39654	2.72299	4.66912		3.59622		14.974		zinc finger protein 300 pseudogene	NR_026867	LOC134466	5q33.1	intracellular	8115205
2.58993	2.60111	3.05704		2.74936		3.32636	3.12869	3.02803		3.16103		14.9732		---	---	---	---	---	7902615
4.08769	3.28585	3.81174		3.72843		5.0421	3.59002	4.2278		4.28664		14.9718		solute carrier family 36 (proton/amino acid symporter), member 3	NM_001145017	SLC36A3	5q33.1	membrane // integral to membrane	8115274
8.18062	8.0634	8.47589		8.23997		8.77454	10.8184	8.82695		9.47331		14.9678		inositol(myo)-1(or 4)-monophosphatase 2	NM_014214	IMPA2	18p11.2	---	8020183
6.31206	5.71846	6.27751		6.10268		7.47042	6.73744	6.84037		7.01608		14.9672		---	---	---	---	---	8112994
3.24784	3.07029	3.2054		3.17451		3.7498	3.31456	3.88405		3.64947		14.9616		Nanog homeobox pseudogene 1	AY455283	NANOGP1	12p13	nucleus	7953689
3.79073	3.10584	3.50863		3.4684		3.97247	3.93626	4.05287		3.9872		14.9578		tachykinin, precursor 1	NM_003182	TAC1	7q21-q22	extracellular region // extracellular space // axon // cell soma	8134420
9.15777	8.51737	9.27229		8.98248		10.5731	10.5242	9.87974		10.3257		14.9536		glycine cleavage system protein H (aminomethyl carrier)	NM_004483	GCSH	16q23.2	mitochondrion // glycine cleavage complex	8002999
10.8659	10.4737	11.1494		10.8297		13.1765	11.5693	12.6006		12.4488		14.9509		keratin 18	NM_199187	KRT18	12q13	cytoplasm // microtubule organizing center // centriolar satellite // keratin filament // perinuclear region of cytoplasm	7955637
6.58472	5.74094	6.67849		6.33471		7.34362	6.86237	7.63867		7.28155		14.9468		cell adhesion molecule 4	NM_145296	CADM4	19q13.31	membrane // integral to membrane	8037363
2.65839	2.30201	2.5055		2.48864		2.6701	2.67442	3.23691		2.86048		14.9415		small nucleolar RNA, C/D box 116-16	NR_003331	SNORD116-16	15q11.2	---	7981980
4.32844	4.28177	4.04831		4.21951		4.37859	3.31389	6.85672		4.84973		14.9361		---	---	---	---	---	8139778
7.67048	7.8975	8.59007		8.05268		8.71913	9.43744	9.60899		9.25518		14.933		FAD-dependent oxidoreductase domain containing 2	NM_024955	FOXRED2	22q12.3	---	8075785
5.11961	5.33749	6.7604		5.73917		6.79258	5.62554	7.36947		6.59586		14.9272		family with sequence similarity 115, member A	AK291605	FAM115A	7q35	---	8143605
4.08769	3.65398	3.43239		3.72469		4.59424	3.76755	4.47991		4.28057		14.9242		RALY RNA binding protein-like	NM_173848	RALYL	8q21.2	---	8147065
5.94804	6.20948	5.98311		6.04688		6.94768	5.78938	8.11088		6.94932		14.924		WD repeat domain 31	NM_001012361	WDR31	9q32	---	8163491
7.12823	6.81997	7.12798		7.02539		8.27202	7.4904	8.45903		8.07382		14.9233		---	---	---	---	---	7901357
6.09269	5.67246	6.0635		5.94288		6.88932	6.32843	7.26672		6.82816		14.8964		NOL1/NOP2/Sun domain family, member 7	NM_024677	NSUN7	4p14	---	8094759
7.59804	7.03767	7.59999		7.4119		8.00196	9.95631	7.58817		8.51548		14.8893		non-specific cytotoxic cell receptor protein 1 homolog (zebrafish)	NM_001001414	NCCRP1	19q13.2	---	8028600
4.98905	3.97791	4.49354		4.48683		5.43597	4.8153	5.2129		5.15472		14.8855		---	---	---	---	---	7976846
5.75773	4.70574	5.27137		5.24495		6.14705	5.57293	6.35669		6.02556		14.8831		selenophosphate synthetase pseudogene // selenophosphate synthetase pseudogene // selenophosphate synthetase pseudogene	NR_002789 // NR_002789 // NR_002789	LOC168474 // LOC168474 // LOC168474	7q11.21 // 7q11.21 // 7q11.21	---	8139826
6.30841	5.42631	6.27392		6.00288		8.13407	6.42397	6.12941		6.89582		14.8751		keratin 13	NM_153490	KRT13	17q12-q21.2	intermediate filament	8015323
4.08769	3.72758	3.43239		3.74922		4.59424	4.09795	4.2278		4.30666		14.8682		glycine-N-acyltransferase	NM_201648	GLYAT	11q12.1	mitochondrion	7948344
6.11383	5.08781	5.91604		5.70589		6.95339	6.06314	6.64394		6.55349		14.8548		leucine rich repeat and fibronectin type III domain containing 1	NM_020862	LRFN1	19q13.2	membrane // integral to membrane // cell junction // synapse	8036707
5.60738	4.52362	5.12448		5.08516		6.91749	4.56014	6.04387		5.8405		14.8539		---	---	---	---	---	8075553
5.76068	4.75873	5.33166		5.28369		6.84413	4.97084	6.38986		6.06828		14.8493		chromosome 2 open reading frame 76	BC126397	C2orf76	2q14.2	---	8054837
9.18426	8.61495	9.38342		9.06088		10.6812	10.5649	9.97292		10.4063		14.8491		glycine cleavage system protein H (aminomethyl carrier)	NM_004483	GCSH	16q23.2	mitochondrion // glycine cleavage complex	7922104
8.17619	7.56859	7.91054		7.8851		9.57664	8.10567	9.48369		9.05533		14.841		TEA domain family member 2	NM_003598	TEAD2	19q13.3	nucleus // transcription factor complex	8038347
9.09079	9.15229	9.7149		9.31932		10.9248	10.2654	10.9159		10.702		14.837		GABA(A) receptor-associated protein-like 2	NM_007285	GABARAPL2	16q22.3-q24.1	Golgi membrane // autophagic vacuole membrane // intracellular // membrane fraction // Golgi apparatus // cytosol	7997272
5.46774	4.47726	5.01747		4.98749		5.48963	6.16718	5.52376		5.72686		14.8244		keratin 75	NM_004693	KRT75	12q13	keratin filament	7963396
4.48747	3.8005	4.37165		4.21987		5.65559	3.97819	4.90246		4.84541		14.8237		histidine decarboxylase	NM_002112	HDC	15q21-q22	---	7988672
6.66879	6.07204	6.99141		6.57741		8.57027	6.73308	7.35306		7.55214		14.8192		WD repeat domain 61	NM_025234	WDR61	15q25.1	---	7990700
7.02518	6.78613	7.20312		7.00481		8.044	8.09542	7.98854		8.04266		14.8162		DENN/MADD domain containing 1B	NM_144977	DENND1B	1q31.3	---	7923141
6.73131	6.30334	7.0151		6.68325		8.1451	6.50527	8.36956		7.67331		14.8141		Fanconi anemia, complementation group F	NM_022725	FANCF	11p15	cellular_component // nucleus	7947138
8.71855	8.52357	8.9926		8.74491		10.9388	9.19196	9.99011		10.0403		14.813		zinc finger, MYM-type 2	NM_003453	ZMYM2	13q11-q12	cellular_component // nucleus // PML body	7967900
9.23267	8.43831	8.93384		8.86827		10.3194	9.80272	10.4233		10.1818		14.8118		postmeiotic segregation increased 2-like 5	NR_027775	PMS2L5	7q11-q22	---	8133309
5.25756	4.47726	5.29947		5.01143		7.04364	4.69334	5.52376		5.75358		14.8091		chromosome X open reading frame 50B	NR_026594	CXorf50B	Xq13.2	---	8168391
6.44715	7.0553	7.32537		6.94261		8.11338	7.32069	8.47576		7.96994		14.7976		kinesin family member 16B	NM_024704	KIF16B	20p11.23	microtubule	8065089
7.04717	6.00003	6.48191		6.5097		7.90045	7.17855	7.3399		7.47297		14.7974		ribosomal modification protein rimK-like family member A	NM_173642	RIMKLA	1p34.2	---	7900540
6.95715	7.3129	7.78386		7.3513		8.52329	7.99923	8.79444		8.43899		14.7958		TATA box binding protein (TBP)-associated factor, RNA polymerase I, C, 110kDa	NM_005679	TAF1C	16q24	nucleus // nucleoplasm	8003125
4.66268	4.47726	4.55673		4.56555		4.75671	5.08165	5.88279		5.24038		14.7809		cytochrome P450, family 4, subfamily Z, polypeptide 2 pseudogene	NR_002788	CYP4Z2P	1p33	membrane // integral to membrane	7915896
6.29168	5.98616	7.12131		6.46639		7.74748	6.86184	7.65649		7.42193		14.7771		similar to ubiquitin-conjugating enzyme E2Q 2	NR_003661	FLJ43276	15q25.2	---	7985444
3.48099	4.22249	3.95958		3.88768		5.12677	3.4991	4.75971		4.46186		14.7691		---	---	---	---	---	8104070
5.47089	5.50775	5.39993		5.45952		6.84859	4.92044	7.02839		6.26581		14.7683		coiled-coil domain containing 85A	NM_001080433	CCDC85A	2p16.1	---	8042079
6.09269	6.07981	6.47361		6.21537		7.54187	6.19614	7.66178		7.13326		14.7682		beta-1,4-N-acetyl-galactosaminyl transferase 4	NM_178537	B4GALNT4	11p15.5	Golgi apparatus // membrane // integral to membrane // Golgi cisterna membrane	7937341
6.69006	6.40941	7.29812		6.7992		7.79397	7.42512	8.18985		7.80298		14.7632		chromosome 9 open reading frame 119	NM_001040011	C9orf119	9q34.11	---	8158204
3.79073	3.35896	3.95958		3.70309		4.64994	3.93743	4.16124		4.24954		14.7565		---	---	---	---	---	8142882
6.99721	6.88183	7.37812		7.08572		8.75287	7.24123	8.39876		8.13095		14.7512		leucine rich repeat containing 28	NM_144598	LRRC28	15q26.3	---	7986394
7.57178	7.53917	8.12092		7.74396		8.30346	8.77434	9.57933		8.88571		14.7438		chromosome 10 open reading frame 57	BC022252	C10orf57	10q22.3	membrane // integral to membrane	7928671
7.16243	7.00002	6.71948		6.96064		8.8295	7.5612	7.5699		7.98687		14.7432		family with sequence similarity 86, member A pseudogene	ENST00000319373	LOC645332	11q13.2	---	7949898
5.33107	4.82591	5.43863		5.19854		4.92906	3.63482	9.33089		5.96492		14.7423		spermatogenesis and oogenesis specific basic helix-loop-helix 2	NM_017826	SOHLH2	13q13.3	nucleus	7970975
6.19484	6.7549	6.59069		6.51348		6.89398	7.71331	7.81382		7.4737		14.7421		zinc finger protein 329	NM_024620	ZNF329	19q13.43	intracellular // nucleus	8039740
5.4968	4.18876	5.22225		4.96927		6.42663	5.07913	5.59818		5.70131		14.7314		---	---	---	---	---	8021374
7.24558	7.72096	8.20308		7.72321		9.73783	8.13884	8.70382		8.86016		14.7213		myosin VC	NM_018728	MYO5C	15q21	myosin complex	7988876
8.47433	8.04166	8.60273		8.37291		8.88548	10.2061	9.72285		9.6048		14.7129		basic helix-loop-helix family, member e40	NM_003670	BHLHE40	3p26	nucleus	8077441
6.17501	5.93077	6.31073		6.13884		6.76727	7.88181	6.47583		7.04163		14.7063		zinc finger and BTB domain containing 7C	NM_001039360	ZBTB7C	18q21.1	intracellular	8023212
3.86664	4.15504	4.03194		4.01787		5.42395	4.17436	4.2278		4.6087		14.7051		---	---	---	---	---	8128892
6.94506	7.23362	7.58158		7.25342		8.65576	7.35611	8.94517		8.31901		14.6908		chromosome 14 open reading frame 179	NM_001102564	C14orf179	14q24.3	---	7975851
7.18022	6.86227	7.33108		7.12452		9.28678	7.35366	7.87231		8.17091		14.6872		chromosome 17 open reading frame 58	NM_181656	C17orf58	17q24.2	---	8017831
7.14573	7.0923	7.79653		7.34485		10.0146	7.39527	7.85936		8.42308		14.68		KIAA1467	NM_020853	KIAA1467	12p13.1	membrane // integral to membrane	7954077
7.6348	7.52323	8.10238		7.75347		8.80378	8.58818	9.28303		8.89166		14.6798		spectrin repeat containing, nuclear envelope 2	NM_182914	SYNE2	14q23.2	nucleus // cytoplasm // cytoskeleton // membrane // integral to membrane // nuclear membrane	7974920
5.25756	5.6439	5.96305		5.6215		7.29398	5.48746	6.55468		6.44538		14.6557		zinc finger, RAN-binding domain containing 3	NM_032143	ZRANB3	2q21.3	intracellular	8055377
9.86751	9.82812	10.253		9.98287		11.6411	10.7983	11.8978		11.4457		14.6537		chromosome 14 open reading frame 1	NM_007176	C14orf1	14q24.3	endoplasmic reticulum // membrane // integral to membrane // transport vesicle	7980309
7.11919	6.91011	7.64296		7.22409		8.48614	7.24054	9.12116		8.28261		14.6527		chromosome 9 open reading frame 123	AK292632	C9orf123	9p24.1	membrane // integral to membrane	8160036
3.55894	2.79544	3.28061		3.21166		3.46672	3.22162	4.35684		3.68173		14.6361		---	---	---	---	---	8023310
3.48099	3.65398	3.58487		3.57328		4.537	3.59002	4.16124		4.09609		14.6311		---	---	---	---	---	8082570
4.87153	4.01633	5.43902		4.77562		6.30251	4.09795	6.0225		5.47432		14.6305		Zic family member 3 (odd-paired homolog, Drosophila)	NM_003413	ZIC3	Xq26.2	intracellular // nucleus	8170200
9.62066	9.6288	10.225		9.82481		10.8847	10.6982	12.2023		11.2618		14.6257		recombination activating gene 1 activating protein 1	NM_018845	RAG1AP1	1q22	nucleus // membrane // integral to membrane	7905938
9.21588	9.26404	10.145		9.54164		10.8954	10.5871	11.328		10.9368		14.6222		fatty acid synthase	NM_004104	FASN	17q25	cytoplasm // Golgi apparatus // cytosol // melanosome // glycogen granule	8019392
7.27365	7.03344	6.90542		7.07084		9.32659	6.74446	8.2429		8.10465		14.6208		tumor protein p53 inducible nuclear protein 1	NM_033285	TP53INP1	8q22	nucleus	8151890
6.33521	5.45948	6.31028		6.03499		7.11282	6.73905	6.89992		6.91726		14.6193		erythrocyte membrane protein band 4.9 (dematin)	NM_001978	EPB49	8p21.1	cytoplasm // actin cytoskeleton // membrane // cortical cytoskeleton	8145005
[truncated: 24,119 more rows]

## Sheet: Lung Arrays
A549 (1)	A549 (2)		A549 avg		MGH-24	NCI-H125	NCI-H358		Avg of Positives		%up/down		Gene Description	Gene Accession	Gene Symbol	Cytoband	GO Cellular Component Term	Probe Set ID
2.81425	2.8824		2.84832		9.70922	9.27882	10.4195		9.80252		244.151		zinc finger protein 626	NM_001076675	ZNF626	19p12	intracellular // nucleus	8035779
3.31254	2.67761		2.99507		10.0001	9.17184	8.41525		9.19574		207.029		UDP-N-acetyl-alpha-D-galactosamine:polypeptide N-acetylgalactosaminyltransferase 3 (GalNAc-T3)	NM_004482	GALNT3	2q24-q31	membrane fraction // Golgi apparatus // membrane // integral to membrane // perinuclear region of cytoplasm	8056408
3.76883	4.03893		3.90388		11.3727	10.8908	11.5404		11.268		188.635		RAB25, member RAS oncogene family	NM_020387	RAB25	1q22	cytoplasm // plasma membrane	7906079
5.17981	3.90575		4.54278		13.1305	12.5093	13.077		12.9056		184.09		mal, T-cell differentiation protein 2	NM_052886	MAL2	8q23	cytoplasm // plasma membrane // integral to membrane // perinuclear region of cytoplasm	8148040
3.73692	4.13388		3.9354		11.6362	10.7762	10.834		11.0821		181.601		G protein-coupled receptor 110	NM_153840	GPR110	6p12.3	plasma membrane // integral to membrane // integral to membrane	8126820
3.38261	3.13861		3.26061		9.60936	9.02172	8.56752		9.0662		178.052		G protein-coupled receptor 87	NM_023915	GPR87	3q24	plasma membrane // integral to membrane	8091515
3.14009	2.27157		2.70583		7.43534	6.48	8.39163		7.43566		174.801		zinc finger protein 702 pseudogene	NR_003578	ZNF702P	19q13.41	intracellular // nucleus	8039025
3.87782	4.13388		4.00585		12.1345	10.6391	10.1451		10.9729		173.922		Rho GDP dissociation inhibitor (GDI) beta	NM_001175	ARHGDIB	12p12.3	cytoplasm // cytoskeleton // cytoplasmic membrane-bounded vesicle	7961532
2.9397	2.75704		2.84837		7.1955	7.1309	8.56727		7.63123		167.915		zinc finger protein 320	NM_207333	ZNF320	19q13.41	intracellular // nucleus	8039006
4.3754	4.61677		4.49609		11.7391	11.8213	12.2835		11.9479		165.741		epithelial splicing regulatory protein 1	NM_017697	ESRP1	8q22.1	nucleus	8147351
2.9724	2.83648		2.90444		8.15024	7.25517	7.71001		7.70514		165.289		zinc finger protein 415	NM_001136038	ZNF415	19q13.42	intracellular // nucleus // cytoplasm	8039044
2.87482	1.72166		2.29824		6.91982	4.68735	6.06356		5.89024		156.293		replication factor C (activator 1) 1, 145kDa	L23320	RFC1	4p14-p13	intracellular // nucleus // nucleoplasm // DNA replication factor C complex	8165672
4.03693	4.31464		4.17578		12.0959	9.69043	10.0669		10.6177		154.27		metastasis associated in colon cancer 1	NM_182762	MACC1	7p21.1	nucleus // cytoplasm	8138466
3.48879	2.97845		3.23362		6.39565	8.84434	9.08715		8.10905		150.773		serpin peptidase inhibitor, clade B (ovalbumin), member 5	NM_002639	SERPINB5	18q21.3	extracellular region // extracellular space	8021584
3.34807	3.06462		3.20635		5.58663	9.78178	8.67999		8.01614		150.008		DnaJ (Hsp40) homolog, subfamily C, member 15	NM_013238	DNAJC15	13q14.1	nucleus // cytoplasm // plasma membrane // focal adhesion // integral to membrane	7968872
3.87782	2.19039		3.0341		10.6304	3.11263	8.82141		7.52147		147.898		interferon-induced protein 44	NM_006417	IFI44	1p31.1	cytoplasm	7902553
3.45313	2.03024		2.74169		6.94365	6.10361	7.00432		6.68386		143.786		zinc finger protein 429	NM_001001415	ZNF429	19p13.1	intracellular // nucleus	8027312
3.17452	1.95195		2.56324		6.34433	5.68959	6.61208		6.21533		142.48		zinc finger protein 204 pseudogene	NR_002722	ZNF204	6p21.3	---	8124498
2.84478	3.12201		2.98339		6.22605	6.87081	8.42971		7.17552		140.515		zinc finger protein 737	NM_001159293	ZNF737	19p12	intracellular // nucleus	8035793
3.52396	3.6532		3.58858		8.25313	8.62119	8.70868		8.52767		137.633		zinc finger protein 83	NM_001105549	ZNF83	19q13.3	intracellular // nucleus	8038967
4.01601	4.96147		4.48874		11.2059	10.6869	10.0888		10.6605		137.495		myelin protein zero-like 2	NM_144765	MPZL2	11q24	cytoskeleton // membrane // integral to membrane	7952046
2.9724	2.51576		2.74408		5.46261	5.85213	8.11053		6.47509		135.966		zinc finger protein 43	NM_003423	ZNF43	19p13.1-p12	intracellular // nucleus	8035813
3.17452	2.98754		3.08103		8.23745	5.78984	7.73363		7.25364		135.429		zinc finger protein 117	NM_015852	ZNF117	7q11.21	intracellular // nucleus	8139832
3.87782	2.67761		3.27771		6.46102	8.07556	8.57888		7.70515		135.077		zinc finger protein 486	NM_052852	ZNF486	19p12	intracellular // nucleus	8027260
5.38286	5.16507		5.27396		12.5246	12.1169	12.5484		12.3966		135.053		thioredoxin interacting protein	NM_006472	TXNIP	1q21.1	cytoplasm	7904726
3.17414	3.13861		3.15638		6.98979	6.85506	8.31009		7.38498		133.97		zinc finger protein 253	NM_021047	ZNF253	19p13.11	intracellular // nucleus	8027241
3.73692	2.99064		3.36378		7.72176	7.2457	8.52115		7.82954		132.76		zinc finger protein 100	NM_173531	ZNF100	19p12	intracellular // nucleus	8035808
3.17414	2.51576		2.84495		7.2375	3.3562	9.15694		6.58354		131.412		absent in melanoma 2	NM_004833	AIM2	1q22	nucleus	7921434
3.17414	2.67761		2.92588		5.5266	6.69718	7.99087		6.73822		130.297		---	---	---	---	---	7904967
3.45375	1.95195		2.70285		5.6155	6.77774	6.25508		6.21611		129.983		zinc finger protein 137	NR_023311	ZNF137	19q13.4	---	8030954
3.45329	2.67761		3.06545		6.07569	6.29818	8.72008		7.03131		129.373		glypican 4	NM_001448	GPC4	Xq26.1	extracellular region // proteinaceous extracellular matrix // extracellular space // plasma membrane // integral to plasma membrane // anchored to membrane	8175217
3.73479	3.06462		3.3997		7.39346	7.36424	8.6209		7.79287		129.222		zinc finger protein 93	NM_031218	ZNF93	19p12	intracellular // nucleus	8027247
3.63048	2.83648		3.23348		7.14413	7.50242	7.50687		7.38447		128.376		zinc finger protein 701	NM_018260	ZNF701	19q13.41	intracellular // nucleus // nucleolus // centrosome	8030950
2.71716	1.87366		2.29541		2.97675	4.44401	8.245		5.22192		127.494		zinc finger protein 676	NM_001001411	ZNF676	19p12	intracellular // nucleus	8035825
2.65609	1.43416		2.04513		2.09092	4.94323	6.92344		4.65253		127.493		zinc finger protein 578	NM_001099694	ZNF578	19q13.41	intracellular // nucleus	8030944
3.38261	2.43426		2.90844		6.39684	6.20487	7.02049		6.54073		124.888		zinc finger protein 816A	NM_001031665	ZNF816A	19q13.41	intracellular // nucleus	8039017
5.14063	4.93026		5.03545		12.055	11.1553	10.7274		11.3126		124.659		tumor-associated calcium signal transducer 2	NM_002353	TACSTD2	1p32-p31	cytosol // plasma membrane // integral to plasma membrane	7916584
5.3845	5.11084		5.24767		11.5869	11.3884	12.1896		11.7217		123.369		cadherin 3, type 1, P-cadherin (placental)	NM_001793	CDH3	16q22.1	plasma membrane // cell-cell adherens junction // integral to membrane	7996819
3.03876	2.11032		2.57454		5.90842	5.41867	5.81699		5.71469		121.97		zinc finger protein 665	NM_024733	ZNF665	19q13.42	intracellular // nucleus	8039062
4.58505	3.76217		4.17361		9.09829	10.1405	8.38967		9.2095		120.66		family with sequence similarity 83, member B	NM_001010872	FAM83B	6p12.1	---	8120335
4.28237	4.25164		4.26701		9.69069	8.35852	9.88781		9.31234		118.241		MDS1 and EVI1 complex locus	NM_001105078	MECOM	3q24-q28	intracellular // nucleus	8091972
3.87782	3.13497		3.50639		7.87664	5.32239	9.74915		7.6494		118.156		transmembrane protease, serine 11E	NM_014058	TMPRSS11E	4q13.2	extracellular region // plasma membrane // integral to plasma membrane	8095380
3.41825	2.59668		3.00746		8.1839	4.72601	6.66369		6.52453		116.945		leucine rich repeat neuronal 1	NM_020873	LRRN1	3p26.2	membrane // integral to membrane	8077366
5.99507	5.40968		5.70237		12.5175	11.8268	12.6592		12.3345		116.304		epithelial cell adhesion molecule	NM_002354	EPCAM	2p21	plasma membrane // integral to membrane // basolateral plasma membrane // apical plasma membrane	8098439
4.05049	3.75865		3.90456		7.55916	8.68213	9.05575		8.43235		115.961		G protein-coupled receptor 81	NM_032554	GPR81	12q24.31	plasma membrane // integral to membrane	7967325
2.9724	2.35276		2.66258		2.97675	4.15197	10.0326		5.72043		114.846		G antigen 12C	NM_001098408	GAGE12C	Xp11.23	---	8167560
3.8427	3.47434		3.65852		7.42698	6.92674	9.16946		7.84106		114.323		dual adaptor of phosphotyrosine and 3-phosphoinositides	NM_014395	DAPP1	4q25-q27	cellular_component // cytoplasm // membrane	8096602
2.53742	1.57501		2.05621		3.53473	4.37622	5.26259		4.39118		113.557		---	---	---	---	---	7924461
4.66826	3.89354		4.2809		8.56069	9.02823	9.73193		9.10695		112.734		zinc finger protein 468	NM_199132	ZNF468	19q13.41	intracellular // nucleus	8038998
3.59496	2.67761		3.13628		8.23887	3.47243	8.29639		6.66923		112.648		sciellin	NM_144777	SCEL	13q22	cornified envelope // cytoplasm // cytoplasm // membrane	7969493
4.18345	4.61677		4.40011		10.1549	7.68652	10.1939		9.34508		112.383		CD274 molecule	NM_014143	CD274	9p24	plasma membrane // integral to membrane	8154233
3.87782	3.2793		3.57856		7.83981	5.4843	9.45612		7.59341		112.192		transmembrane protease, serine 11E	NM_014058	TMPRSS11E	4q13.2	extracellular region // plasma membrane // integral to plasma membrane	8095364
4.21761	4.55799		4.3878		9.76835	8.94476	9.14053		9.28454		111.599		interferon regulatory factor 6	NM_006147	IRF6	1q32.3-q41	nucleus	7924058
3.59496	3.53663		3.5658		7.58569	7.14736	7.82899		7.52068		110.912		zinc finger protein 347	NM_032584	ZNF347	19q13.42	intracellular // nucleus	8039054
3.17414	2.83648		3.00531		10.419	4.57079	3.93854		6.30945		109.943		STEAP family member 4	NM_024636	STEAP4	7q21.12	Golgi apparatus // plasma membrane // integral to membrane	8140840
4.40712	3.70036		4.05374		9.08365	8.76378	7.64598		8.4978		109.629		membrane protein, palmitoylated 7 (MAGUK p55 subfamily member 7)	NM_173496	MPP7	10p12.1	adherens junction // tight junction // membrane // cell junction	7932765
3.70146	3.81313		3.75729		8.83901	6.95727	7.8097		7.86866		109.424		beta-1,3-N-acetylgalactosaminyltransferase 1 (globoside blood group)	NM_001038628	B3GALNT1	3q25	Golgi apparatus // membrane // integral to membrane	8091780
3.66577	3.70769		3.68673		7.75884	6.66903	8.71133		7.71306		109.212		multiple C2 domains, transmembrane 2	NM_018349	MCTP2	15q26.2	membrane fraction // membrane // integral to membrane	7986293
4.96397	4.04674		4.50536		8.79835	9.1602	10.1609		9.37315		108.045		zinc finger protein 808	NM_001039886	ZNF808	19q13.41	intracellular // nucleus	8030946
3.59496	2.99064		3.2928		6.49341	6.37095	7.62486		6.82974		107.415		zinc finger protein 844	NM_001136501	ZNF844	19p13.2	intracellular // nucleus	8025984
5.36703	5.45892		5.41298		12.3632	10.5504	10.6805		11.198		106.874		suppression of tumorigenicity 14 (colon carcinoma)	NM_021978	ST14	11q24-q25	extracellular region // plasma membrane // integral to plasma membrane // extrinsic to plasma membrane	7945204
3.31254	3.13861		3.22557		5.88502	6.81718	7.21319		6.63846		105.807		CTAGE family, member 4	NM_198495	CTAGE4	7q35	cellular_component // membrane // integral to membrane	8129560
4.84964	4.2895		4.56957		11.2174	5.51618	11.4473		9.39362		105.569		actin filament associated protein 1	NM_198595	AFAP1	4p16	cytoplasm // cytoskeleton // plasma membrane // focal adhesion	8094028
3.94749	3.12426		3.53587		7.39152	7.01959	7.37293		7.26134		105.362		proline-serine-threonine phosphatase interacting protein 2	NM_024430	PSTPIP2	18q12	cytoplasm // membrane	8023043
4.67649	5.02414		4.85032		9.33353	10.0693	10.2918		9.89822		104.074		grainyhead-like 2 (Drosophila)	NM_024915	GRHL2	8q22.3	nucleus // cytoplasm	8147697
4.18462	3.81313		3.99887		11.0531	4.37622	9.0427		8.15735		103.991		interferon-induced protein 44-like	NM_006820	IFI44L	1p31.1	cytoplasm	7902541
5.51504	5.08966		5.30235		10.7457	10.7579	10.8079		10.7705		103.128		tetraspanin 1	NM_005727	TSPAN1	1p34.1	membrane // integral to membrane	7901175
4.11702	2.91356		3.51529		7.21372	5.6497	8.48938		7.1176		102.475		protocadherin beta 14	NM_018934	PCDHB14	5q31	plasma membrane // integral to membrane	8108744
5.34956	4.83569		5.09263		9.74374	10.4028	10.4299		10.1922		100.136		absent in melanoma 1	NM_001624	AIM1	6q21	cellular_component	8121277
4.15163	3.86409		4.00786		6.78263	8.11252	8.96111		7.95209		98.4125		zinc finger protein 649	NM_023074	ZNF649	19q13.41	intracellular // nucleus	8038913
4.08453	4.11277		4.09865		8.9895	7.14153	8.20718		8.11274		97.9369		endoplasmic reticulum protein 27	NM_152321	ERP27	12p12.3	endoplasmic reticulum // endoplasmic reticulum lumen	7961524
3.73679	3.63323		3.68501		7.37327	5.9547	8.53729		7.28842		97.7858		zinc finger protein 528	NM_032423	ZNF528	19q13	intracellular // nucleus	8030931
3.8422	4.42842		4.13531		7.88556	6.37053	10.263		8.17304		97.6401		transmembrane protease, serine 4	NM_019894	TMPRSS4	11q23.3	membrane // integral to membrane	7944164
5.31375	5.23095		5.27235		7.38454	11.945	11.9268		10.4188		97.6117		kallikrein-related peptidase 6	NM_002774	KLK6	19q13.3	extracellular region // nucleus // nucleolus // cytoplasm // mitochondrion // endoplasmic reticulum // microsome	8038683
3.10603	2.35276		2.7294		5.26933	4.40697	6.47286		5.38305		97.2251		chromosome 9 open reading frame 84	NM_173521	C9orf84	9q31.3	---	8163348
4.21761	3.53663		3.87712		8.23887	7.09556	7.59533		7.64325		97.1372		schlafen family member 12	NM_018042	SLFN12	17q12	---	8014241
4.21761	3.6532		3.93541		7.2104	8.3956	7.65381		7.75327		97.0131		KIAA1324-like	NM_001142749	KIAA1324L	7q21.12	membrane // integral to membrane	8140709
6.61136	5.71577		6.16356		12.3061	11.6652	12.2643		12.0785		95.9666		epithelial cell adhesion molecule	NM_002354	EPCAM	2p21	plasma membrane // integral to membrane // basolateral plasma membrane // apical plasma membrane	8041853
4.40786	4.61797		4.51291		9.23864	7.91148	9.32279		8.8243		95.5346		bone marrow stromal cell antigen 2	NM_004335	BST2	19p13.2	Golgi apparatus // plasma membrane // integral to plasma membrane // anchored to membrane	8035304
4.87243	4.95659		4.91451		9.54352	9.29006	9.9567		9.59676		95.2741		interferon induced transmembrane protein 3 (1-8U)	NM_021034	IFITM3	11p15.5	plasma membrane // integral to membrane	7945371
3.70146	2.91356		3.30751		6.29638	5.61885	7.44169		6.4523		95.0806		zinc finger protein 382	NM_032825	ZNF382	19q13.12	intracellular // nucleus	8028194
4.2162	4.01501		4.1156		7.89149	8.10128	7.99347		7.99542		94.2708		actin-related Arp11	AB039791	ARP11	7q36.1	cytoskeleton	8143766
4.45655	5.65913		5.05784		9.70922	9.24736	10.4176		9.79139		93.5883		---	---	---	---	---	8180217
3.59496	4.04933		3.82215		8.42247	4.79521	8.94364		7.38711		93.2712		slit homolog 2 (Drosophila)	NM_004787	SLIT2	4p15.2	extracellular region	8094301
3.45313	2.91356		3.18334		7.08845	4.89555	6.46563		6.14988		93.1893		interleukin 7	NM_000880	IL7	8q12-q13	extracellular region // extracellular space	8151447
5.61907	5.37025		5.49466		10.7586	10.6574	10.3397		10.5852		92.6459		tubulointerstitial nephritis antigen-like 1	NM_022164	TINAGL1	1p35.2	extracellular region	7899627
3.87753	3.47434		3.67594		7.43544	6.46375	7.25629		7.05183		91.8375		PFTAIRE protein kinase 1	NM_012395	PFTK1	7q21-q22	nucleus // cytoplasm // cytosol	8134098
5.16103	3.86409		4.51256		9.03093	8.98232	7.91519		8.64282		91.5281		signal transducing adaptor family member 2	NM_017720	STAP2	19p13.3	cytoplasm	8032789
3.45313	2.99064		3.22188		9.18759	4.74229	4.56667		6.16552		91.3638		complement component (3d/Epstein Barr virus) receptor 2	NM_001006658	CR2	1q32	plasma membrane // integral to membrane	7909350
3.70146	3.06462		3.38304		5.80962	7.07964	6.38077		6.42334		89.869		SATB homeobox 1	NM_002971	SATB1	3p23	nucleus	8085716
3.8427	3.46625		3.65447		7.528	4.88241	8.39374		6.93472		89.7596		protocadherin beta 8	NM_019120	PCDHB8	5q31	plasma membrane // integral to membrane	8108713
3.24301	1.87366		2.55833		5.64666	3.47243	5.43912		4.85274		89.6835		BCL2/adenovirus E1B 19kDa interacting protein 3	ENST00000355069	BNIP3	10q26.3	nucleus // nuclear envelope // nucleoplasm // cytoplasm // mitochondrion // mitochondrion // membrane // integral to membrane // dendrite // integral to mitochondrial outer membrane // mitochondrial membrane // mitochondrial membrane	7973743
2.62614	1.57501		2.10057		4.78432	3.34843	3.80241		3.97839		89.3954		---	---	---	---	---	7919778
5.66149	5.88394		5.77272		10.6605	11.7407	10.3632		10.9214		89.1908		mitogen-activated protein kinase 13	NM_002754	MAPK13	6p21.31	---	8119016
3.41899	3.39137		3.40518		4.39317	6.24919	8.67335		6.43857		89.0818		zinc finger protein 730	AK131472	ZNF730	19p12	intracellular // nucleus	8027348
2.74406	1.65391		2.19899		3.76217	4.4817	4.21292		4.15226		88.8263		---	---	---	---	---	8063408
2.77935	1.64834		2.21384		3.82368	2.79508	5.87934		4.16603		88.181		small nucleolar RNA, C/D box 116-18	NR_003333	SNORD116-18	15q11.2	---	7981984
4.21761	2.03024		3.12393		5.42952	6.20487	5.98605		5.87348		88.0159		---	---	---	---	---	7985918
3.80758	4.4954		4.15149		8.04492	7.39887	7.86656		7.77012		87.1646		zinc finger protein 813	NM_001004301	ZNF813	19q13.42	intracellular // nucleus	8030997
3.00558	2.51343		2.7595		6.4181	4.2305	4.83549		5.16136		87.0395		forkhead box P2	NM_148898	FOXP2	7q31	intracellular // nucleus	8135544
3.59496	2.67761		3.13628		5.58788	5.87689	6.09559		5.85345		86.6366		CTAGE family, member 4	NM_198495	CTAGE4	7q35	cellular_component // membrane // integral to membrane	8136979
3.45313	3.53663		3.49488		6.47731	5.23898	7.77072		6.49567		85.8624		protocadherin beta 13	NM_018933	PCDHB13	5q31	plasma membrane // integral to membrane	8108737
4.28237	3.2793		3.78083		7.18088	7.01976	6.86275		7.02113		85.7032		zinc finger protein 625	NM_145233	ZNF625	19p13.2	intracellular // nucleus	8034344
4.05049	3.47434		3.76241		7.4037	5.76189	7.753		6.97286		85.3296		zinc finger protein 501	NM_145044	ZNF501	3p21.31	intracellular // nucleus	8079229
3.14009	2.59668		2.86838		5.61487	4.79145	5.53523		5.31385		85.2559		zinc finger protein 91 pseudogene	NR_024380	LOC441666	10q11.21	---	8069494
3.666	2.03024		2.84812		5.39565	5.7486	4.677		5.27375		85.166		vomeronasal 1 receptor 1	NM_020633	VN1R1	19q13.4	plasma membrane // integral to membrane	8039642
3.34807	2.19039		2.76923		7.5903	3.63279	4.10429		5.10913		84.4963		lumican	NM_002345	LUM	12q21.3-q22	extracellular region // proteinaceous extracellular matrix // fibrillar collagen	7965403
4.46844	3.76217		4.1153		7.01231	5.80129	9.95039		7.588		84.3849		interleukin 7 receptor	NM_002185	IL7R	5p13	extracellular region // plasma membrane // integral to membrane	8104901
5.41823	4.25164		4.83494		11.1341	3.93605	11.6726		8.91425		84.3716		EGF-like repeats and discoidin I-like domains 3	NM_005711	EDIL3	5q14	extracellular region	8112980
5.62205	5.88353		5.75279		10.7126	10.2905	10.8027		10.602		84.2924		claudin 7	NM_001307	CLDN7	17p13	plasma membrane // tight junction // integral to membrane // cell junction	8012126
5.12024	3.41205		4.26614		8.1038	6.87977	8.5751		7.85289		84.0747		zinc finger protein 626	NM_145297	ZNF626	19p12	intracellular // nucleus	8035795
3.70127	3.86088		3.78107		4.36458	7.87414	8.63611		6.95828		84.029		zinc finger protein 506	NM_001099269	ZNF506	19p13.11	intracellular // nucleus // nucleolus	8035773
3.17414	2.67761		2.92588		5.42952	5.63706	5.06201		5.3762		83.7467		zinc finger protein 763	NM_001012753	ZNF763	19p13.2	intracellular // nucleus	8025978
2.71941	2.59668		2.65805		4.78621	3.79314	6.06356		4.88097		83.6301		ribosomal protein SA pseudogene 52	NR_026825	RPSAP52	12q14.3	---	7964733
5.48419	4.93336		5.20877		9.19623	10.2063	9.25508		9.55253		83.393		3-oxoacid CoA transferase 1	NM_000436	OXCT1	5p13.1	mitochondrion // mitochondrion // mitochondrial matrix // mitochondrial matrix	8111892
4.69471	4.70324		4.69898		8.52777	8.2598	9.05897		8.61551		83.3487		exophilin 5	NM_015065	EXPH5	11q22.3	---	7951545
3.10603	2.35276		2.7294		5.25161	4.44401	5.29965		4.99842		83.133		zinc finger protein 708	ENST00000356929	ZNF708	19p12	intracellular // nucleus	8020377
3.80758	3.41205		3.60981		5.90922	4.37622	9.52627		6.60391		82.9432		membrane metallo-endopeptidase	NM_007288	MME	3q25.1-q25.2	plasma membrane // integral to plasma membrane	8083494
3.73692	4.67556		4.20624		7.10954	6.96307	9.0095		7.69404		82.9197		protein arginine methyltransferase 6	NM_018137	PRMT6	1p13.3	nucleus	7903457
4.28237	4.88535		4.58386		8.29965	7.61298	9.19816		8.37026		82.6029		muscleblind-like 3 (Drosophila)	NM_018388	MBNL3	Xq26.2	nucleus // nucleolus // cytoplasm // Golgi apparatus	8175177
3.17414	2.83648		3.00531		2.97675	6.26238	7.21319		5.48411		82.4805		zinc finger protein 682	NM_033196	ZNF682	19p12	intracellular // nucleus	8035782
3.45313	3.2793		3.36621		3.63861	7.19737	7.58785		6.14127		82.4386		POTE ankyrin domain family, member F	NM_001099771	POTEF	2q21.1	cytoplasm // cell cortex	8055153
5.57811	4.61797		5.09804		8.61874	9.204	10.0422		9.28831		82.1936		zinc finger protein 28	NM_006969	ZNF28	19q	intracellular // nucleus	8038993
4.58505	4.04933		4.31719		7.78854	7.19737	8.56752		7.85114		81.8575		zinc finger protein 91	NM_003430	ZNF91	19p13.1-p12	intracellular // nucleus	8035842
3.31254	3.06462		3.18858		3.42758	6.88577	7.01979		5.77771		81.2001		POTE ankyrin domain family, member E	NM_001083538	POTEE	2q21.1	---	8055222
4.15163	4.21378		4.18271		7.60063	7.62765	7.49493		7.5744		81.0886		chemokine (C-C motif) ligand 28	NM_148672	CCL28	5p12	extracellular region // extracellular space	8111932
5.07831	4.72683		4.90257		8.89857	8.91791	8.69469		8.83706		80.2536		poly (ADP-ribose) polymerase family, member 8	NM_024615	PARP8	5q11.1	intracellular // nucleus	8105191
3.73692	3.53663		3.63678		7.42708	6.12444	6.05277		6.53476		79.6855		GRAM domain containing 1C	NM_017577	GRAMD1C	3q13.31	membrane // integral to membrane	8081758
3.76883	3.41205		3.59044		5.53316	5.45727	8.34034		6.44359		79.4652		zinc finger protein 90	NM_007138	ZNF90	19p13.1-p12	intracellular // nucleus // Golgi apparatus	8027254
5.63699	5.3058		5.4714		11.1527	7.08462	11.1944		9.81058		79.3066		---	---	---	---	---	8053735
5.608	5.3058		5.4569		11.1561	7.05273	11.1366		9.78182		79.256		---	---	---	---	---	8043480
4.40712	4.86052		4.63382		8.40298	7.38413	9.13078		8.30596		79.2464		UDP glycosyltransferase 8	NM_001128174	UGT8	4q26	membrane // integral to membrane	8097017
3.0724	2.434		2.7532		2.48357	2.92195	9.3685		4.92467		78.8711		B melanoma antigen family, member 2	NM_182482	BAGE2	21p	extracellular region	8069487
3.666	2.51576		3.09088		5.28899	4.37622	6.89947		5.52156		78.6405		zinc finger protein 677	NM_182609	ZNF677	19q13.42	intracellular // nucleus	8039070
3.80758	3.70769		3.75763		7.68347	6.34388	6.08465		6.704		78.4103		DENN/MADD domain containing 2C	NM_198459	DENND2C	1p13.2	---	7918768
3.52396	3.6532		3.58858		6.54066	7.80584	4.83166		6.39272		78.1407		methyltransferase like 7A	NM_014033	METTL7A	12q13.12	---	7955441
4.34511	3.77296		4.05904		7.10216	7.00062	7.55092		7.2179		77.8228		glutamyl aminopeptidase (aminopeptidase A)	NM_001977	ENPEP	4q25	plasma membrane // integral to plasma membrane // brush border // external side of plasma membrane // apical plasma membrane // cytoplasmic vesicle	8096875
4.21761	3.59492		3.90627		5.30721	5.46801	10.0244		6.93322		77.4896		trichorhinophalangeal syndrome I	NM_014112	TRPS1	8q24.12	intracellular // nucleus	8152453
3.31254	2.67761		2.99507		5.17381	5.57789	5.18555		5.31242		77.372		zinc finger protein 818 pseudogene	ENST00000344759	ZNF818P	19q13.42	intracellular // nucleus	8030969
5.66598	5.3058		5.48589		11.0809	7.1165	10.9925		9.72996		77.3634		---	---	---	---	---	8161563
3.77122	2.98754		3.37938		4.88718	5.40049	7.65		5.97922		76.9324		zinc finger protein 876 (pseudogene)	NR_027481	ZNF876P	4p16.3	intracellular // nucleus	8093332
3.14009	4.09161		3.61585		5.58757	5.23085	8.34597		6.38813		76.6703		zinc finger protein 404	NM_001033719	ZNF404	19q13.31	intracellular // nucleus	8037430
3.49086	3.58711		3.53898		3.58667	3.73714	11.4321		6.25198		76.6603		maelstrom homolog (Drosophila)	NM_032858	MAEL	1q24.1	nucleus // cytoplasm // P granule	7907032
3.52396	3.6494		3.58668		7.0689	4.73825	7.17568		6.32761		76.4198		protocadherin beta 10	NM_018930	PCDHB10	5q31	plasma membrane // integral to membrane	8108724
3.55946	3.41205		3.48575		7.72455	5.78824	4.92707		6.14662		76.3355		tumor necrosis factor (ligand) superfamily, member 10	NM_003810	TNFSF10	3q26	extracellular region // extracellular space // soluble fraction // integral to plasma membrane // membrane	8092169
3.38261	3.76217		3.57239		6.32368	5.03409	7.51873		6.29217		76.1332		zinc finger protein 616	BC032805	ZNF616	19q13.41	intracellular // nucleus	8038952
3.17452	3.47434		3.32443		5.84656	5.31161	6.39373		5.85063		75.9891		zinc finger protein 681	NM_138286	ZNF681	19p12	intracellular // nucleus	8035855
3.17414	3.13497		3.15456		3.83317	5.9547	6.85653		5.54813		75.8768		fucosyltransferase 9 (alpha (1,3) fucosyltransferase)	NM_006581	FUT9	6q16	Golgi apparatus // membrane // integral to membrane	8121152
5.66598	5.41127		5.53862		11.0809	7.1165	10.9925		9.72996		75.6747		---	---	---	---	---	8161580
3.63048	3.53263		3.58155		7.30864	5.91281	5.64044		6.2873		75.5467		ectonucleotide pyrophosphatase/phosphodiesterase 5 (putative function)	NM_021572	ENPP5	6p21.1-p11.2	extracellular region // membrane // integral to membrane	8126750
4.46844	3.86409		4.16626		7.06713	7.31981	7.54986		7.31227		75.5114		zinc finger protein 790	NM_206894	ZNF790	19q13.12	intracellular // nucleus	8036357
4.6924	2.19471		3.44355		5.92073	5.17128	7.02624		6.03942		75.3833		small nucleolar RNA, C/D box 116-6	NR_003321	SNORD116-6	15q11.2	---	7981960
4.89808	5.41127		5.15467		9.64943	8.74068	8.69134		9.02715		75.1255		fructose-1,6-bisphosphatase 1	NM_000507	FBP1	9q22.3	cytosol	8162502
5.72172	5.41127		5.56649		11.0809	7.1165	10.9925		9.72996		74.7951		---	---	---	---	---	8043484
3.63048	4.00446		3.81747		7.82627	4.50878	7.67514		6.67006		74.7247		Nik related kinase	NM_198465	NRK	Xq22.3	---	8169115
4.08255	4.45972		4.27113		7.83981	7.0021	7.52261		7.45484		74.5401		CUG triplet repeat, RNA binding protein 2	NM_001025077	CUGBP2	10p13	nucleus // cytoplasm	7926127
3.73639	4.63983		4.18811		6.67734	10.9623	4.26147		7.30036		74.3115		urothelial cancer associated 1 (non-protein coding)	NR_015379	UCA1	19p13.12	---	8026490
5.45196	4.61797		5.03497		8.15531	7.29246	10.873		8.77358		74.253		zinc finger protein 542	NR_024056	ZNF542	19q13.43	intracellular // nucleus	8031632
3.00189	2.11871		2.5603		3.9716	4.75701	4.64833		4.45898		74.1585		---	---	---	---	---	8085052
6.1876	6.22011		6.20386		11.2927	9.9629	11.1554		10.8037		74.1441		family with sequence similarity 83, member A	NM_032899	FAM83A	8q24.13	---	8148184
5.66598	5.3058		5.48589		10.8971	7.08462	10.6331		9.53828		73.8692		---	---	---	---	---	8161568
4.84964	3.6532		4.25142		8.45573	5.94872	7.68218		7.36221		73.1706		protocadherin beta 9	NM_019119	PCDHB9	5q31	plasma membrane // integral to membrane	8108720
3.38283	2.91356		3.1482		6.35528	6.19038	3.80199		5.44921		73.0901		leucine rich repeat containing 34	NM_153353	LRRC34	3q26.2	---	8092009
4.28237	3.76217		4.02227		7.02344	6.90407	6.92344		6.95032		72.7959		zinc finger protein 600	NM_198457	ZNF600	19q13.41	intracellular // nucleus	8038989
4.08453	4.69038		4.38745		8.28399	5.41836	9.00802		7.57013		72.5403		myocyte enhancer factor 2C	NM_002397	MEF2C	5q14	nucleus // nuclear speck	8113039
3.52396	3.6532		3.58858		6.2686	4.30515	7.97375		6.1825		72.2826		F-box and leucine-rich repeat protein 13	NM_145032	FBXL13	7q22.1	---	8141846
3.94749	3.53663		3.74206		6.75618	5.54736	7.00432		6.43596		71.9897		family with sequence similarity 190, member A	NM_001145065	FAM190A	4q22.1	---	8096425
3.48854	2.99064		3.23959		3.7369	9.42738	3.52831		5.56419		71.7561		tudor domain containing 1	NM_198795	TDRD1	10q25.3	cytoplasm // P granule	7930631
3.52405	3.06462		3.29433		3.88134	6.07175	7.01444		5.65584		71.684		zinc finger protein 560	NM_152476	ZNF560	19p13.2	intracellular // nucleus	8033767
3.52396	3.76217		3.64306		3.73884	7.36427	7.65381		6.25231		71.6223		POTE ankyrin domain family, member E	NM_001083538	POTEE	2q21.1	---	8045257
3.03876	3.2793		3.15903		5.75748	5.03409	5.47199		5.42119		71.6093		zinc finger protein 471	NM_020813	ZNF471	19q13.43	intracellular // nucleus	8031650
3.80758	4.2895		4.04854		6.75618	7.10607	6.94701		6.93642		71.3315		zinc finger protein 642	NM_198494	ZNF642	1p34.2	intracellular // nucleus	7900446
5.9489	5.67059		5.80974		11.419	9.4579	8.90002		9.92565		70.8449		cystatin E/M	NM_001323	CST6	11q13	cornified envelope // extracellular region	7941505
3.1077	2.43426		2.77098		4.14004	4.30336	5.74674		4.73005		70.6995		---	---	---	---	---	8180205
4.21761	4.97982		4.59871		4.76007	8.22287	10.5588		7.84724		70.64		CSAG family, member 2	NM_001080848	CSAG2	Xq28	---	8175710
4.58505	3.9596		4.27233		7.91944	7.08497	6.86275		7.28905		70.6109		sterile alpha motif domain containing 12	NM_207506	SAMD12	8q24.12	---	8152506
3.80758	3.41205		3.60981		6.00219	6.45558	5.98605		6.14794		70.3119		zinc finger protein 433	NM_001080411	ZNF433	19p13.2	intracellular // nucleus	8034320
4.28237	2.99064		3.6365		6.39398	4.50878	7.67514		6.19264		70.2909		serine palmitoyltransferase, long chain base subunit 3	NM_018327	SPTLC3	20p12.1	endoplasmic reticulum // membrane // integral to membrane // serine C-palmitoyltransferase complex	8060997
5.47878	5.31476		5.39677		8.05034	8.80616	10.6951		9.18386		70.1732		snail homolog 2 (Drosophila)	NM_003068	SNAI2	8q11	intracellular // nucleus	8150698
2.84318	2.13532		2.48925		2.97604	5.69364	4.03456		4.23475		70.1216		---	---	---	---	---	8173522
3.31254	2.35276		2.83265		5.49496	4.50878	4.45063		4.81813		70.0927		---	---	---	---	---	8119235
5.27704	4.61797		4.9475		8.97469	9.08949	7.17377		8.41265		70.0383		solute carrier family 37 (glycerol-3-phosphate transporter), member 2	NM_198277	SLC37A2	11q24.2	membrane // integral to membrane	7944931
4.01644	2.67761		3.34702		6.17187	4.98937	5.89201		5.68442		69.8351		PIH1 domain containing 2	NM_138789	PIH1D2	11q23.1	---	7951672
3.80674	4.09607		3.95141		7.15191	5.79757	7.18152		6.71034		69.8214		zinc finger protein 610	NM_001161425	ZNF610	19q13.41	intracellular // nucleus	8030914
4.30075	3.81313		4.05694		7.44575	6.75656	6.43183		6.87805		69.5379		MAM domain containing 2	NM_153267	MAMDC2	9q21.12	extracellular region // interstitial matrix // endoplasmic reticulum // membrane	8155754
3.24301	2.03024		2.63663		4.64948	4.68735	4.07231		4.46971		69.5239		---	---	---	---	---	8139767
3.59496	3.6532		3.62408		5.13328	6.96307	6.32884		6.14173		69.47		thyrotropin-releasing hormone degrading enzyme	NM_013381	TRHDE	12q15-q21	integral to plasma membrane // membrane	7957221
5.07771	3.70769		4.3927		8.68149	4.56951	9.06434		7.43845		69.3367		transmembrane protein 45A	NM_018004	TMEM45A	3q12.2	membrane // integral to membrane	8081288
4.08009	4.17974		4.12992		6.4437	6.39684	8.13282		6.99112		69.2798		transmembrane protein 154	NM_152680	TMEM154	4q31.3	membrane // integral to membrane	8103226
3.59496	3.40797		3.50146		5.70313	6.05014	5.98317		5.91215		68.8479		CTAGE family, member 6	NM_178561	CTAGE6	7q35	cellular_component	8143601
5.98238	5.43521		5.7088		10.2379	9.08546	9.57609		9.63315		68.7422		CDP-diacylglycerol synthase (phosphatidate cytidylyltransferase) 1	NM_001263	CDS1	4q21.23	endoplasmic reticulum // membrane // integral to membrane	8096130
6.72482	6.18101		6.45292		12.3379	8.86346	11.4483		10.8832		68.656		EGF-containing fibulin-like extracellular matrix protein 1	NM_004105	EFEMP1	2p16	extracellular region // proteinaceous extracellular matrix	8052355
3.87753	1.87366		2.87559		4.65673	5.2165	4.67627		4.84984		68.6551		---	---	---	---	---	7962479
5.54759	4.88535		5.21647		9.63861	7.99868	8.74948		8.79559		68.6118		family with sequence similarity 160, member A1	NM_001109977	FAM160A1	4q31.3	---	8097801
5.7488	5.82159		5.7852		9.87513	9.43414	9.93131		9.74686		68.4793		transmembrane protein 30B	NM_001017970	TMEM30B	14q23.1	membrane // integral to membrane	7979524
5.49978	5.4444		5.47209		9.78076	8.86342	9.00879		9.21765		68.4485		claudin 4	NM_001305	CLDN4	7q11.23	plasma membrane // integral to plasma membrane // tight junction // cell junction	8133360
4.40786	4.21378		4.31082		6.896	7.1575	7.71688		7.25679		68.3391		zinc finger protein 440	NM_152357	ZNF440	19p13.2	intracellular // nucleus	8025958
5.63728	4.88535		5.26131		8.85828	8.30271	9.40596		8.85565		68.3163		myelin protein zero-like 3	NM_198275	MPZL3	11q23.3	membrane // integral to membrane	7952036
3.94749	2.83648		3.39198		5.5266	5.45171	6.13718		5.70517		68.1956		zinc finger protein 441	NM_152355	ZNF441	19p13.2	intracellular // nucleus	8025945
3.38261	2.35276		2.86769		5.04863	5.60778	3.80255		4.81966		68.0677		zinc finger protein 709	NM_152601	ZNF709	19p13.2	intracellular // nucleus	8034395
5.34956	5.44478		5.39717		9.98882	8.53436	8.68083		9.06801		68.0141		spleen tyrosine kinase	NM_003177	SYK	9q22	cytoplasm // plasma membrane // B cell receptor complex // T cell receptor complex	8156321
5.20073	4.13388		4.6673		7.82717	7.21689	8.42368		7.82258		67.6038		zinc finger protein 85	NM_003429	ZNF85	19p13.1-p12	intracellular // nucleus	8027272
4.31409	4.00446		4.15928		7.18132	6.38457	7.33211		6.966		67.481		IKAROS family zinc finger 2 (Helios)	NM_016260	IKZF2	2q34	intracellular // nucleus	8058670
4.69548	3.53663		4.11606		4.18018	6.28105	10.2148		6.89201		67.4421		hypothetical protein LOC100288114	AK302988	LOC100288114	19q13.43	---	8031646
3.17414	2.67761		2.92588		4.64948	5.20027	4.83166		4.8938		67.2594		zinc finger protein 345	NM_003419	ZNF345	19q13.12	intracellular // nucleus	8028206
5.03455	5.3184		5.17647		8.90347	7.69523	9.36377		8.65415		67.1824		tripartite motif-containing 2	NM_015271	TRIM2	4q31.3	intracellular // cytoplasm	8097841
4.79975	5.37696		5.08836		10.05	10.2006	5.26259		8.50439		67.1344		vestigial like 1 (Drosophila)	NM_016267	VGLL1	Xq26.3	nucleus	8170179
2.9724	2.03024		2.50132		4.52977	4.06924	3.93854		4.17918		67.0792		---	---	---	---	---	8002758
3.87782	3.9596		3.91871		6.92002	6.43904	6.2552		6.53809		66.843		pleiomorphic adenoma gene 1	NM_002655	PLAG1	8q12	intracellular // nucleus	8150881
5.82712	4.4954		5.16126		7.66603	7.69881	10.4619		8.6089		66.7984		zinc finger protein 850 pseudogene	BC052603	ZNF850P	19q13.12	intracellular // nucleus	8036351
4.94512	3.86409		4.4046		6.44455	9.64524	5.9398		7.3432		66.7165		synaptotagmin XIV	NR_027458	SYT14	1q32.2	membrane // integral to membrane	7909494
3.73031	2.86183		3.29607		5.39736	5.67634	5.37277		5.48216		66.324		---	---	---	---	---	8084878
3.91265	4.4954		4.20403		6.40944	6.99695	7.56837		6.99159		66.307		zinc finger protein 454	NM_182594	ZNF454	5q35.3	intracellular // nucleus	8110478
3.45313	2.99064		3.22188		3.42758	4.37622	8.26858		5.35746		66.2835		structural maintenance of chromosomes 1B	NM_148674	SMC1B	22q13.31	nucleus // chromosome // cytoplasm	8076704
3.66577	2.434		3.04988		7.22312	2.98679	4.94944		5.05312		65.6824		XK, Kell blood group complex subunit-related family, member 9	NM_001011720	XKR9	8q13.3	membrane // integral to membrane	8146900
3.73679	3.39591		3.56635		3.68496	6.80753	7.23095		5.90781		65.6544		zinc finger family member 788	NR_027049	ZNF788	19p13.2	intracellular // nucleus	8025992
4.21761	3.2793		3.74845		8.1654	6.18518	4.26657		6.20571		65.5539		guanylate binding protein 4	NM_052941	GBP4	1p22.2	cytoplasm	7917561
4.11702	4.09161		4.10432		8.06118	4.53179	7.78714		6.79337		65.5177		N-acetylated alpha-linked acidic dipeptidase-like 2	NM_207015	NAALADL2	3q26.31	membrane // integral to membrane	8083978
3.66547	3.53263		3.59905		6.97703	4.50624	6.37911		5.95412		65.436		chondroitin sulfate synthase 3	NM_175856	CHSY3	5q23.3	Golgi apparatus // membrane // integral to membrane // Golgi cisterna membrane	8107850
4.28237	3.76217		4.02227		6.54066	6.59642	6.82508		6.65405		65.4303		G protein-coupled receptor 137C	NM_001099652	GPR137C	14q22.1	membrane // integral to membrane	7974372
2.9724	1.72166		2.34703		4.25672	3.11263	4.26657		3.87864		65.2575		---	---	---	---	---	8114213
6.5664	6.38466		6.47553		10.1825	10.8946	11.0052		10.6941		65.1466		coagulation factor III (thromboplastin, tissue factor)	NM_001993	F3	1p22-p21	extracellular space // plasma membrane // plasma membrane // integral to membrane // extracellular matrix // intrinsic to external side of plasma membrane	7917875
2.74825	2.27157		2.50991		4.59085	4.0976	3.73407		4.14084		64.9795		leucine rich repeat containing 39	NM_144620	LRRC39	1p21.2	---	7917996
3.34807	1.87595		2.61201		4.28462	3.93605	4.70349		4.30805		64.9323		small nucleolar RNA, C/D box 116-26	NR_003340	SNORD116-26	15q11.2	---	7982000
6.5511	5.68805		6.11957		10.6258	10.2782	9.36934		10.0911		64.8989		sodium channel, nonvoltage-gated 1 alpha	NM_001038	SCNN1A	12p13	membrane fraction // plasma membrane // external side of plasma membrane // integral to membrane // apical plasma membrane // cortical actin cytoskeleton // sodium channel complex	7960529
5.48455	4.93336		5.20895		9.40322	6.89197	9.46431		8.5865		64.8412		endogenous retroviral sequence 3 (includes zinc finger protein H-plk/HPF9)	NM_001007253	ERV3	7p12-q11|7q11.2	virion // viral capsid // viral envelope	8139840
4.43815	3.81313		4.12564		4.2898	5.05447	11.0556		6.79996		64.8221		G antigen 12C	NM_001098408	GAGE12C	Xp11.23	---	8167526
3.87782	4.67556		4.27669		7.83981	6.81718	6.4493		7.03543		64.5066		serine/threonine/tyrosine kinase 1	NM_018423	STYK1	12p13.2	plasma membrane // integral to membrane	7961215
6.00399	5.54054		5.77227		9.83812	9.70643	8.91384		9.48613		64.3398		DENN/MADD domain containing 2D	NM_024901	DENND2D	1p13.3	---	7918487
3.80758	4.13388		3.97073		7.13964	5.65085	6.77983		6.52344		64.2881		Kallmann syndrome 1 sequence	NM_000216	KAL1	Xp22.32	extracellular region // proteinaceous extracellular matrix // extracellular space // cell surface	8171248
5.87707	6.14069		6.00888		10.305	7.16757	12.0527		9.84177		63.7871		cellular retinoic acid binding protein 2	NM_001878	CRABP2	1q21.3	nucleus // cytoplasm	7921099
4.44214	5.02414		4.73314		4.67546	8.05299	10.5035		7.74397		63.6117		CSAG family, member 2	NM_001080848	CSAG2	Xq28	---	8170580
4.82469	5.28733		5.05601		10.6878	8.94625	5.16552		8.26653		63.499		solute carrier family 43, member 3	NM_017611	SLC43A3	11q11	membrane // integral to membrane	7948229
4.28237	3.13861		3.71049		5.80985	5.51618	6.86275		6.06293		63.3997		zinc finger protein 568	NM_198539	ZNF568	19q13.12	intracellular // nucleus	8028213
5.65163	5.30267		5.47715		8.67767	8.88477	9.28591		8.94945		63.3962		junctophilin 1	NM_020647	JPH1	8q21	microsome // plasma membrane // junctional sarcoplasmic reticulum membrane // integral to membrane // sarcoplasmic reticulum // Z disc // junctional membrane complex	8151423
5.69385	5.47753		5.58569		8.65494	7.04079	11.6406		9.1121		63.133		tenascin C	NM_002160	TNC	9q33	extracellular region // proteinaceous extracellular matrix	8163637
4.74837	4.55799		4.65318		7.8335	7.36427	7.55753		7.5851		63.009		hypothetical LOC400590	ENST00000433145	LOC400590	17q11.2	---	8006237
4.48893	3.32192		3.90542		6.29393	6.1491	6.6275		6.35684		62.7697		zinc finger protein 321	NM_203307	ZNF321	19q13.41	intracellular	8039013
6.06118	6.40182		6.2315		10.0968	9.17184	11.1237		10.1308		62.5739		serine peptidase inhibitor, Kunitz type 1	NM_181642	SPINT1	15q15.1	extracellular region // membrane fraction	7982829
4.28171	4.42842		4.35507		7.6299	6.98597	6.61283		7.07623		62.4827		NOL1/NOP2/Sun domain family, member 7	NM_024677	NSUN7	4p14	---	8094759
4.436	4.42719		4.43159		7.78765	7.01366	6.7982		7.19984		62.4661		KIAA1305	NM_025081	KIAA1305	14q12	membrane // integral to membrane	7973724
4.3754	3.53663		3.95602		6.46898	5.54736	7.2259		6.41408		62.1347		zinc finger protein 10	NM_015394	ZNF10	12q24.33	intracellular // nucleus // cytoplasm // plasma membrane	7960158
6.97984	6.43546		6.70765		10.9916	10.8139	10.7761		10.8605		61.9123		metallothionein 1E	NM_175617	MT1E	16q13	cytoplasm	7995797
3.38261	2.99064		3.18663		8.96318	2.98679	3.52831		5.15942		61.9087		solute carrier family 6 (amino acid transporter), member 14	NM_007231	SLC6A14	Xq23-q24	integral to plasma membrane // membrane // brush border membrane	8169504
6.91615	6.38466		6.65041		10.8612	10.1871	11.2499		10.766		61.8856		laminin, beta 3	NM_001017402	LAMB3	1q32	extracellular region // basement membrane	7924029
3.45329	2.83648		3.14488		5.55626	4.32002	5.38827		5.08818		61.7925		---	---	---	---	---	7916018
4.28171	4.00446		4.14309		9.04008	5.04578	6.01769		6.70118		61.7437		Rho GTPase activating protein 20	NM_020809	ARHGAP20	11q23.1	intracellular	7951565
4.28237	3.76217		4.02227		5.25161	6.20487	8.05194		6.50281		61.6701		ADP-ribosylation factor-like 14	NM_025047	ARL14	3q25.33	intracellular	8083743
5.02955	4.70324		4.8664		8.01991	7.68458	7.88409		7.86286		61.5746		zinc finger protein 418	NM_133460	ZNF418	19q13.43	intracellular // nucleus	8039698
3.80758	4.2895		4.04854		8.40129	4.30515	6.9115		6.53931		61.5228		radical S-adenosyl methionine domain containing 2	NM_080657	RSAD2	2p25.2	endoplasmic reticulum // Golgi apparatus // membrane	8040080
3.666	3.47434		3.57017		6.35131	4.30336	6.64217		5.76561		61.4941		protocadherin 18	NM_019035	PCDH18	4q31	plasma membrane // integral to membrane	8102792
5.57811	4.97982		5.27896		8.25313	6.53551	10.771		8.51987		61.3929		S100 calcium binding protein A2	NM_005978	S100A2	1q21	cellular_component	7920285
5.07831	4.42998		4.75414		7.53214	7.43267	8.05194		7.67225		61.3803		zinc finger protein 700	NM_144566	ZNF700	19p13.2	intracellular // nucleus	8025973
4.9216	4.61797		4.76978		7.98783	6.0282	9.03139		7.68247		61.0655		heparan sulfate 6-O-sulfotransferase 2	NM_001077188	HS6ST2	Xq26.2	membrane // integral to membrane	8175195
5.56285	4.79889		5.18087		7.35855	8.90315	8.7709		8.3442		61.0578		short chain dehydrogenase/reductase family 42E, member 1	NM_145168	SDR42E1	16q23.3	membrane // integral to membrane	8003060
5.80467	6.72738		6.26602		11.7569	8.62668	9.87978		10.0878		60.9918		integrin, beta 6	NM_000888	ITGB6	2q24.2	integrin complex // membrane // integral to membrane	8056184
4.99015	4.25164		4.62089		5.01279	7.92101	9.37259		7.43547		60.9097		zinc finger protein interacting with K protein 1 homolog (mouse)	NM_001010879	ZIK1	19q13.43	intracellular // nucleus	8031768
3.94749	4.2895		4.11849		8.02291	6.14497	5.71106		6.62631		60.8916		programmed cell death 1 ligand 2	NM_025239	PDCD1LG2	9p24.2	extracellular region // plasma membrane // integral to membrane	8154245
4.46844	3.2793		3.87387		4.0999	7.0743	7.51084		6.22835		60.7785		ubiquitin specific peptidase 44	NM_032147	USP44	12q22	nucleus	7965565
4.58505	4.36145		4.47325		11.1086	5.03409	5.40548		7.18272		60.5705		G protein-coupled receptor 116	NM_015234	GPR116	6p12.3	plasma membrane // integral to membrane // integral to membrane	8126798
4.46844	4.61797		4.5432		11.9608	4.94323	4.97377		7.29258		60.5163		LIM domain only 3 (rhombotin-like 2)	NM_018640	LMO3	12p12.3	---	7961580
3.34807	3.34567		3.34687		6.60105	4.40697	5.09001		5.36601		60.3291		mucin 15, cell surface associated	NM_001135091	MUC15	11p14.3	extracellular region // plasma membrane // integral to membrane	7947156
4.53362	5.10111		4.81737		8.32907	6.07995	8.75946		7.72283		60.3122		immunoglobulin kappa constant // immunoglobulin kappa constant	AF113887 // AF113887	IGKC // IGKC	2p12 // 2p12	extracellular region // extracellular region // extracellular region // extracellular region	8043431
4.05049	3.41205		3.73127		6.23998	5.5148	6.17083		5.9752		60.1387		zinc finger protein 493	NM_001076678	ZNF493	19p12	intracellular // nucleus	8027304
4.30602	2.59668		3.45135		7.59795	5.59221	3.35843		5.5162		59.8271		GTPase, IMAP family member 2	NM_015660	GIMAP2	7q36.1	membrane // integral to membrane	8137250
2.9724	1.87366		2.42303		3.42758	3.79314	4.39055		3.87042		59.7352		chromosome 5 open reading frame 36	NM_173665	C5orf36	5q15	---	8113113
4.28171	3.59492		3.93832		3.73111	6.72466	8.36794		6.27457		59.3211		contactin associated protein-like 4	NM_033401	CNTNAP4	16q23.1	membrane // integral to membrane	7997289
5.34783	5.05228		5.20005		7.58821	8.05659	9.17384		8.27288		59.0922		DnaJ (Hsp40) homolog, subfamily A, member 4	NM_018602	DNAJA4	15q25.1	membrane	7985147
2.71716	2.19039		2.45377		3.53473	4.57079	3.59682		3.90078		58.9706		---	---	---	---	---	8034326
4.52752	3.9596		4.24356		8.72825	3.69118	7.81624		6.74523		58.9522		complement factor I	NM_000204	CFI	4q25	extracellular region // extracellular space // membrane	8102328
3.10603	2.35276		2.7294		5.49496	3.98203	3.52831		4.3351		58.8301		sodium channel, voltage-gated, type II, alpha subunit	NM_021007	SCN2A	2q23-q24	voltage-gated sodium channel complex // membrane	8046020
3.38261	1.72433		2.55347		4.42379	3.6377	4.10517		4.05555		58.8249		zinc finger protein 846	NM_001077624	ZNF846	19p13.2	intracellular // nucleus	8033809
3.45313	2.67761		3.06537		5.75748	3.58422	5.26259		4.8681		58.8095		zinc finger protein 596	NM_001042416	ZNF596	8p23.3	intracellular // nucleus	8144230
2.90701	2.67761		2.79231		4.46603	4.68735	4.13803		4.43047		58.667		---	---	---	---	---	7905054
5.01171	3.50135		4.25653		5.17159	6.14709	8.92359		6.74743		58.5194		protocadherin beta 6	NM_018939	PCDHB6	5q31	plasma membrane // integral to plasma membrane	8108703
5.3845	3.9596		4.67205		8.81729	5.87689	7.50291		7.39903		58.3679		sterile alpha motif domain containing 9-like	NM_152703	SAMD9L	7q21.2	---	8140971
5.01171	4.42998		4.72085		7.66259	6.64622	8.1157		7.47484		58.3369		tetraspanin 2	NM_005725	TSPAN2	1p13.2	membrane // integral to membrane	7918857
6.8813	5.88353		6.38242		10.3367	9.74443	10.1994		10.0935		58.1454		family with sequence similarity 84, member B	NM_174911	FAM84B	8q24.21	cytoplasm // plasma membrane	8152812
7.41965	6.43546		6.92755		10.7893	11.2652	10.8117		10.9554		58.1425		LIM domain and actin binding 1	NM_001113546	LIMA1	12q13	stress fiber // cytoplasm // focal adhesion // actin cytoskeleton // cell junction	7963187
5.5778	4.82769		5.20274		7.59976	8.17125	8.89443		8.22181		58.0285		T-cell lymphoma invasion and metastasis 1	NM_003253	TIAM1	21q22.1|21q22.11	intracellular // plasma membrane	8069880
5.62264	4.64676		5.1347		9.94666	8.52856	5.85504		8.11009		57.9466		integrin, beta 8	NM_002214	ITGB8	7p21.1	integrin complex // membrane // integral to membrane	8131666
5.16103	4.88535		5.02319		8.03945	6.95146	8.80859		7.93317		57.9309		protocadherin beta 16	NM_020957	PCDHB16	5q31	membrane // integral to membrane	8108716
4.96397	4.45972		4.71184		7.71432	7.50584	7.09121		7.43713		57.8389		neuromedin U	NM_006681	NMU	4q12	extracellular region	8100464
3.21069	2.1915		2.70109		4.75909	3.41431	4.61608		4.26316		57.831		killer cell lectin-like receptor subfamily C, member 2	NM_002260	KLRC2	12p13	integral to plasma membrane // membrane	7961182
5.92535	5.76965		5.8475		9.15506	9.33933	9.18335		9.22591		57.7754		epithelial splicing regulatory protein 2	NM_024939	ESRP2	16q22.1	nucleus	8002218
3.98384	3.4818		3.73282		5.79224	6.27338	5.59647		5.88736		57.719		---	---	---	---	---	8144717
6.01731	5.19147		5.60439		9.19486	8.4583	8.8435		8.83222		57.5946		ArfGAP with RhoGAP domain, ankyrin repeat and PH domain 2	NM_015230	ARAP2	4p14	intracellular // cytoplasm	8099760
4.64104	4.21378		4.42741		7.56298	6.82992	6.48195		6.95828		57.1636		BH3-like motif containing, cell death inducer	NM_001001786	BLID	11q24.1	cytoplasm // mitochondrion	7952309
7.81873	6.36729		7.09301		11.3521	11.2472	10.8324		11.1439		57.111		epithelial membrane protein 1	NM_001423	EMP1	12p12.3	membrane fraction // membrane // integral to membrane	7954090
4.15163	3.53663		3.84413		6.08952	5.9947	6.03087		6.03836		57.08		zinc finger protein 20	NM_021143	ZNF20	19p13.3-p13.2	intracellular // nucleus	8034334
4.13801	3.34567		3.74184		6.54242	4.91939	6.15753		5.87311		56.9579		---	---	---	---	---	7904693
4.60841	5.12789		4.86815		10.3191	5.31298	7.28892		7.64032		56.9452		nephronectin	NM_001033047	NPNT	4q24	extracellular region // proteinaceous extracellular matrix // membrane	8096704
6.26252	6.06692		6.16472		9.56514	9.20631	10.2536		9.67501		56.9417		ladinin 1	NM_005558	LAD1	1q25.1-q32.3	extracellular region // basement membrane	7923347
3.03876	2.35276		2.69576		2.51996	2.60337	7.56517		4.2295		56.8947		ring finger protein 17	NM_031277	RNF17	13q12.12	nucleus // cytoplasm	7968085
2.90701	2.19039		2.5487		4.18018	3.79314	4.00576		3.99303		56.6695		RNA, U5F small nuclear	NR_002753	RNU5F	1p34.1	---	7915590
5.50048	4.21169		4.85609		7.46803	7.35165	7.99648		7.60539		56.6156		zinc finger protein 738	NR_027130	ZNF738	19p12	intracellular // nucleus	8027297
3.80758	3.41205		3.60981		7.60063	3.98203	5.37105		5.65124		56.5522		bromodomain, testis-specific	NM_207189	BRDT	1p22.1	nucleus	7902934
5.78843	5.43388		5.61116		8.12693	5.87668	12.3163		8.7733		56.3545		lymphocyte cytosolic protein 1 (L-plastin)	NM_002298	LCP1	13q14.3	ruffle // phagocytic cup // cytoplasm // cytosol // actin filament	7971461
4.28237	3.6532		3.96779		4.46603	4.57079	9.57248		6.2031		56.3365		gametocyte specific factor 1	NM_144594	GTSF1	12q13.13	cytoplasm	7963817
3.59496	3.53663		3.5658		7.07785	5.54736	4.07231		5.56584		56.0897		major histocompatibility complex, class II, DQ beta 1	AK097297	HLA-DQB1	6p21.3	plasma membrane // membrane // membrane // integral to membrane // MHC class II protein complex	8125461
5.03268	4.90935		4.97102		7.86169	6.8416	8.5656		7.75629		56.0304		zinc finger protein 772	NM_001024596	ZNF772	19q13.43	intracellular // nucleus	8039645
4.01644	3.41205		3.71424		6.85919	3.79314	6.73314		5.79516		56.0253		guanylate binding protein family, member 6	NM_198460	GBP6	1p22.2	---	7902850
5.7488	5.26886		5.50883		8.88294	8.35652	8.53288		8.59078		55.9456		allograft inflammatory factor 1-like	NM_031426	AIF1L	9q34.13-q34.3	focal adhesion // actin cytoskeleton	8158771
6.18532	5.84688		6.0161		10.6699	7.70574	9.76385		9.37982		55.9119		semaphorin 7A, GPI membrane anchor (John Milton Hagen blood group)	NM_003612	SEMA7A	15q22.3-q23	plasma membrane // anchored to membrane	7990345
4.94241	4.21104		4.57672		4.75614	5.31298	11.3283		7.13248		55.8426		G antigen 4	NM_001474	GAGE4	Xp11.4-p11.2	---	8167482
4.94241	4.21104		4.57672		4.75614	5.31298	11.3283		7.13248		55.8426		G antigen 12C	NM_001098408	GAGE12C	Xp11.23	---	8167562
5.54918	5.47425		5.51171		8.77509	7.87192	9.10433		8.58378		55.737		myosin VB	NM_001080467	MYO5B	18q21	myosin complex	8023267
2.7799	1.89346		2.33668		4.13622	3.8122	2.9647		3.63771		55.6785		---	---	---	---	---	8003859
4.21215	4.35974		4.28594		4.95572	4.62907	10.407		6.66394		55.4836		histone cluster 1, H2ba	NM_170610	HIST1H2BA	6p22.2	nucleosome // nucleus // chromosome	8117301
6.01662	6.3046		6.16061		8.7369	9.55006	10.4382		9.57507		55.424		hexokinase 2	NM_000189	HK2	2p13	mitochondrion // mitochondrial outer membrane // cytosol // membrane	8042942
4.84964	3.41205		4.13084		7.40171	6.33566	5.50413		6.41383		55.2669		chromosome 9 open reading frame 95	NR_023352	C9orf95	9q21.13	---	8161839
5.49837	4.66555		5.08196		8.6654	7.52851	7.47063		7.88818		55.2193		interferon-induced protein with tetratricopeptide repeats 2	NM_001547	IFIT2	10q23-q25	cellular_component	7929047
3.03876	1.72166		2.38021		3.73884	3.47243	3.87075		3.69401		55.1967		---	---	---	---	---	8094391
3.03921	3.19861		3.11891		5.21271	5.10507	4.20282		4.8402		55.1888		---	---	---	---	---	8149275
3.87782	4.13156		4.00469		7.38165	4.8709	6.38598		6.21285		55.1394		solute carrier family 38, member 4	NM_018018	SLC38A4	12q13	plasma membrane // integral to membrane	7962559
2.90701	2.51576		2.71138		2.63263	3.47243	6.51387		4.20631		55.1353		---	---	---	---	---	8027332
3.63048	3.59492		3.6127		6.20924	4.06028	6.5313		5.60027		55.0163		indoleamine 2,3-dioxygenase 1	NM_002164	IDO1	8p12-p11	cytoplasm // cytosol	8146092
3.14247	2.83412		2.98829		3.92749	4.55925	5.39908		4.62861		54.8913		small nucleolar RNA, C/D box 116-13	NR_003328	SNORD116-13	15q11.2	---	7981974
3.52396	3.53663		3.5303		4.39942	5.82693	6.1776		5.46799		54.8875		POTE ankyrin domain family, member B	NM_207355	POTEB	15q11.2	---	7986605
4.46844	5.11084		4.78964		8.78495	6.79136	6.66369		7.41333		54.7785		HLA complex P5	NM_006674	HCP5	6p21.3	---	8118111
5.51642	6.14069		5.82855		8.70078	8.93595	9.35179		8.99617		54.3466		zinc finger protein 625	AK292455	ZNF625	19p13.2	intracellular // nucleus	8034342
4.58505	4.67556		4.63031		7.22975	6.77828	7.42948		7.14584		54.3275		zinc finger protein 793	NM_001013659	ZNF793	19q13.12	intracellular // nucleus	8028254
6.22444	5.41127		5.81785		10.2504	6.26238	10.414		8.97561		54.2769		anthrax toxin receptor 2	NM_058172	ANTXR2	4q21.21	extracellular region // endoplasmic reticulum // plasma membrane // integral to membrane	8101260
3.73692	2.99064		3.36378		4.8628	4.79521	5.89201		5.18334		54.0928		small nucleolar RNA, C/D box 116-29	NR_003360	SNORD116-29	15q11.2	---	7982006
3.17414	2.67761		2.92588		4.64948	4.79521	4.07231		4.50566		53.9937		---	---	---	---	---	7917514
3.24301	2.91356		3.07828		3.68872	5.4896	5.03904		4.73912		53.9534		POTE ankyrin domain family, member D	NM_174981	POTED	21q11.2	plasma membrane	8067844
7.52178	6.94902		7.2354		11.5651	11.1084	10.7409		11.1382		53.9398		solute carrier family 44, member 2	NM_020428	SLC44A2	19p13.1	membrane // integral to membrane	8025672
3.27838	2.91356		3.09597		3.63138	3.74216	6.90186		4.75847		53.6989		zinc finger protein 479 // zinc finger protein 479	NM_033273 // NM_033273	ZNF479 // ZNF479	7p11.2 // 7p11.2	intracellular // nucleus // intracellular // nucleus	8139800
3.24301	3.53663		3.38982		6.72924	4.37622	4.50935		5.20494		53.546		chromosome 7 open reading frame 58	NM_024913	C7orf58	7q31.31	endoplasmic reticulum	8135734
2.53742	2.03024		2.28383		4.46603	2.85937	3.19165		3.50568		53.5002		---	---	---	---	---	8026005
4.34511	3.74812		4.04662		5.11243	6.25267	7.25403		6.20638		53.372		zinc finger protein 826	NM_001039884	ZNF826	19p12	intracellular // nucleus	8035789
3.03876	2.67761		2.85818		4.25672	3.23604	5.6549		4.38255		53.3336		protocadherin beta 4	NM_018938	PCDHB4	5q31	cytoplasm // plasma membrane // integral to plasma membrane	8108693
3.31254	3.41205		3.36229		3.42758	3.23604	8.79891		5.15417		53.2935		hypothetical LOC100133469	NR_027457	LOC100133469	---	---	7977447
3.38261	3.13861		3.26061		5.58788	4.57079	4.83166		4.99678		53.2466		actin, beta-like 2	NM_001017992	ACTBL2	5q11.2	cytoplasm // cytoskeleton	8112198
5.86342	5.89535		5.87938		8.91453	9.27416	8.84087		9.00986		53.245		B-box and SPRY domain containing	NM_017688	BSPRY	9q32	intracellular // cytoplasm // membrane	8157300
4.40786	4.97982		4.69384		8.49624	4.89555	8.18678		7.19286		53.2405		eyes absent homolog 1 (Drosophila)	NM_000503	EYA1	8q13.3	nucleus // cytoplasm	8151310
3.24301	2.35276		2.79788		4.0999	4.68735	4.07231		4.28652		53.2058		---	---	---	---	---	8126369
5.59244	5.47717		5.5348		8.34762	8.76573	8.32309		8.47881		53.1909		Rho guanine nucleotide exchange factor (GEF) 5	NM_005435	ARHGEF5	7q33-q35	intracellular	8143610
5.12024	4.55799		4.83911		9.39895	5.41836	7.39561		7.40431		53.0097		tripartite motif-containing 55	NM_033058	TRIM55	8q13.1	intracellular // nucleus // cytoplasm // microtubule	8146669
5.94871	4.12878		5.03874		7.76466	6.58637	8.7754		7.70881		52.9907		small Cajal body-specific RNA 9	NR_002569	SCARNA9	11q21	---	7943158
3.03876	2.35276		2.69576		4.32973	4.37622	3.66545		4.1238		52.9737		---	---	---	---	---	8014863
2.90701	1.43416		2.17058		3.63861	2.85937	3.46004		3.31934		52.9239		---	---	---	---	---	7989144
3.8427	4.28193		4.06231		5.24962	5.9947	7.38192		6.20875		52.8377		DEAD/H (Asp-Glu-Ala-Asp/His) box polypeptide 26B	NM_182540	DDX26B	Xq26.3	---	8170027
3.63048	2.19471		2.91259		5.24266	4.59807	3.50555		4.44876		52.7422		---	---	---	---	---	8124846
4.49646	4.48253		4.48949		7.1043	6.61005	6.84943		6.8546		52.6809		zinc finger protein 829	NM_001037232	ZNF829	19q13.12	intracellular // nucleus	8036365
4.74761	4.52397		4.63579		8.54316	4.98976	7.69814		7.07702		52.6604		selectin L	NM_000655	SELL	1q23-q25	plasma membrane // plasma membrane // integral to plasma membrane // external side of plasma membrane	7922219
5.77538	5.50955		5.64247		9.71441	8.6394	7.48691		8.61357		52.6562		protease, serine, 8	NM_002773	PRSS8	16p11.2	extracellular region // extracellular space // plasma membrane // integral to membrane	8001007
4.43666	4.42374		4.4302		6.24777	6.81075	7.22285		6.76046		52.5993		CTAGE family, member 6	NM_178561	CTAGE6	7q35	cellular_component	8136936
5.40157	5.51926		5.46041		9.16409	10.4064	5.41761		8.32937		52.541		serpin peptidase inhibitor, clade A (alpha-1 antiproteinase, antitrypsin), member 1	NM_001002236	SERPINA1	14q32.1	extracellular region // extracellular region // proteinaceous extracellular matrix // extracellular space // platelet alpha granule lumen	7981068
4.52752	3.76217		4.14484		7.22975	4.74229	6.99304		6.32169		52.5196		microtubule-associated protein 2	NM_002374	MAP2	2q34-q35	cytoplasm // cytoskeleton // microtubule // microtubule associated complex	8047926
3.03876	2.83648		2.93762		5.21324	4.15197	4.07231		4.47917		52.4763		---	---	---	---	---	8092218
3.38261	2.35276		2.86769		4.95871	3.69118	4.45063		4.36684		52.2775		---	---	---	---	---	7916984
3.27777	2.6645		2.97114		4.25672	5.37758	3.93854		4.52428		52.2745		glutathione S-transferase alpha 3	NM_000847	GSTA3	6p12.1	cytoplasm	8127087
4.74837	2.19039		3.46938		3.83519	5.16048	6.8503		5.28199		52.246		relaxin 2	NM_134441	RLN2	9p24.1	extracellular region	8159977
3.73692	2.83648		3.2867		3.92749	4.06924	7.00432		5.00035		52.1391		zinc finger protein 479 // zinc finger protein 479	NM_033273 // NM_033273	ZNF479 // ZNF479	7p11.2 // 7p11.2	intracellular // nucleus // intracellular // nucleus	8133023
4.14665	4.21169		4.17917		6.29614	5.38382	7.39126		6.35707		52.1133		ATPase, aminophospholipid transporter (APLT), class I, type 8A, member 1	NM_006095	ATP8A1	4p14-p12	membrane // integral to membrane // cytoplasmic vesicle	8100026
[truncated: 2,233 more rows]

## Sheet: SAEC+-FCS
SAEC+FCS	SAEC-FCS		%up/down		Gene Description	Gene Accession	Gene Symbol	Cytoband	GO Cellular Component Term	Probe Set ID
[truncated: 22,283 more rows]
